# Supplementary material for: A toolbox approach to revealing a series of naphthocarbazoles to showcase photocatalytic reductive syntheses
Source: Royal Society of Chemistry journal article supplement (doi:10.1039/d4sc03438d), 2024-01-01

## Supporting Information

### A toolbox approach to revealing series of naphthocarbazoles to showcase photocatalytic reductive syntheses

Sharmila Das, Samrat Kundu, Abhisek Metya and Modhu Sudan Maji\*

Department of Chemistry, Indian Institute of Technology Kharagpur,  
Kharagpur-721302, India.

**E-mail:** msm@chem.iitkgp.ac.in

| <b>Table of contents</b>                                                                                         | <b>Page Number</b> |
|------------------------------------------------------------------------------------------------------------------|--------------------|
| General Remarks                                                                                                  | <b>S1</b>          |
| General Setup for the Reaction                                                                                   | <b>S2</b>          |
| Experimental Section for Photo-Physical Studies                                                                  | <b>S2-S13</b>      |
| Luminescence Quenching Experiments                                                                               | <b>S14-S16</b>     |
| General Procedures                                                                                               | <b>S16-S22</b>     |
| General Procedure for Borylation (GP-III)                                                                        | <b>S22-S23</b>     |
| General Procedure for the Phosphorylation (GP-IV)                                                                | <b>S24-S25</b>     |
| General Procedure for the Reductive C-C Coupling of <i>ortho</i> -bromo substituted N-phenyl benzamide (GP-V)    | <b>S25-S26</b>     |
| General Procedure for the Pinacol and Imino-Pinacol Coupling (GP-VI and GP-VII)                                  | <b>S27-S29</b>     |
| General Procedure for the Reductive Desulfonylation of Heteroaromatic Compounds and Peptides (GP-VIII and GP-IX) | <b>S29-S31</b>     |
| Gram Scale synthesis                                                                                             | <b>S31-S34</b>     |
| Compound Characterization Data of Synthesized Compounds                                                          | <b>S34-S61</b>     |
| Computational Details                                                                                            | <b>S61-S78</b>     |
| References                                                                                                       | <b>S79-S81</b>     |
| <sup>1</sup> H, <sup>13</sup> C, <sup>11</sup> B, <sup>31</sup> P and <sup>19</sup> F NMR Spectra                | <b>S82-S197</b>    |

## Experimental Sections

**General Remarks:** All reactions involving air or moisture-sensitive reagents were carried out in flame dried glassware under argon atmosphere. Ethyl acetate was obtained from SRL India. Acetonitrile (CH<sub>3</sub>CN) and dichloromethane (CH<sub>2</sub>Cl<sub>2</sub>) were distilled over calcium hydride. Dimethyl sulfoxide (DMSO) and *N, N*-dimethylformamide (DMF) were distilled over potassium carbonate. All the dry solvents were stored over 4 Å molecular sieves under argon atmosphere. Tetrahydrofuran was distilled over sodium-metal in the presence of benzophenone. Aldehydes, ketones and all other reagents were used without further purification as received from commercial sources. All photoredox reactions were performed with Kessil® PR160L-390 nm Purple LED and when performing the photochemical reactions, test tube (made of borosilicate) was placed 4 cm away from light source. No filters were used between light sources and the reaction vessel for the execution of reactions. Reactions were monitored by thin-layer chromatography (TLC) using Merck silica gel 60 F254 pre-coated plates (0.25 mm), and visualized under UV light or by dipping into appropriate staining solutions (KMnO<sub>4</sub>, DNP, anisaldehyde or ninhydrin solutions). Purification of compounds were carried out by flash column chromatography on Silica gel (particle size 100-200 mesh, purchased from SRL India) or activated neutral aluminium oxide using mixture of hexanes and ethyl acetate as eluents. The <sup>1</sup>H NMR spectroscopic data were recorded with a Bruker 400 or 500 MHz instruments. Proton decoupled <sup>13</sup>C NMR spectra (<sup>13</sup>C{<sup>1</sup>H}) was recorded at 101 or 126 MHz NMR instruments by using a broadband decoupled mode. <sup>11</sup>B, <sup>19</sup>F, and <sup>31</sup>P NMR spectra were recorded at 160 MHz, 471 MHz and 202 MHz, respectively. Proton and carbon NMR chemical shifts (δ) are reported in parts per million (ppm) relative to the residual proton or carbon signals in CDCl<sub>3</sub> (δ = 7.26, 77.16) or DMSO-*d*<sub>6</sub> (δ = 2.50, 39.52). Coupling constants (*J*) are reported in Hertz (Hz) and refer to apparent multiplicities. The following abbreviations are used for the multiplicities: s: singlet, d: doublet, t: triplet, q: quartet, dd: doublet of doublets, dt: doublet of triplet, m: multiplet, br: broad. Infrared (IR) spectra were recorded by Perkin Elmer FTIR spectrometer, and reported in terms of wave number (cm<sup>-1</sup>). High resolution mass spectra (HRMS) were recorded in ESI (+ Ve) method using a time-of-flight (TOF) mass analyser.

## General set-up for photochemical reaction:

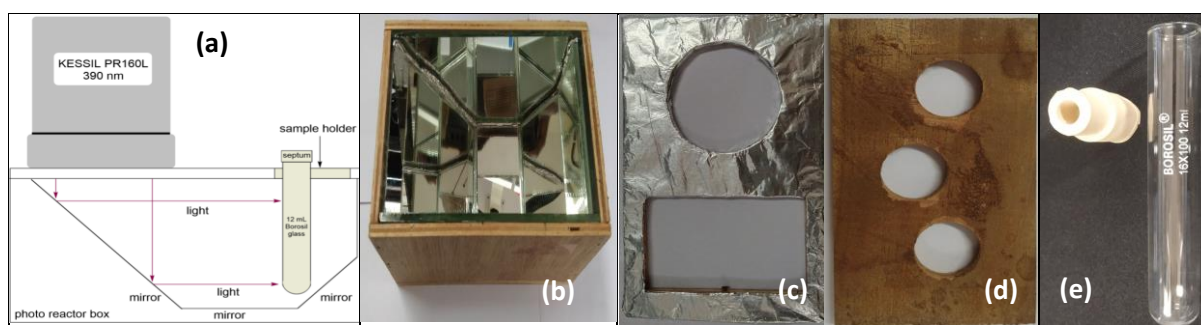

**Figure S1:** (a) Diagram of the photoreactor box. (b) Photoreactor box with several mirrors. (c) Box closer. (d) Sample holder rack. (e) 12 mL borosil reaction test tube and rubber septum.

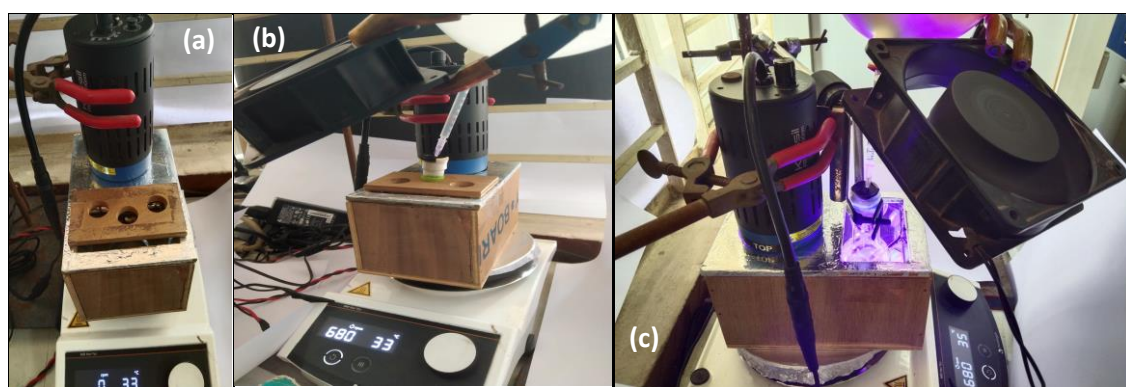

**Figure S2:** (a) Photoreactor set-up with Kessil light. (b) Complete reaction set-up with one cooling fan. (c) Set up of the gram scale reaction under irradiation Kessil purple LED (390 nm).

## Experimental Section for Photo-Physical Studies:

**Steady State Absorption and Fluorescence Measurements:** UV-Vis and fluorescence measurements have been done in Shimadzu UV-Vis spectrophotometer (model UV 2450) and Hitachi F-7000 fluorimeter, respectively. All samples were taken in micro molar concentrations using dichloromethane as solvent. Molar extinction coefficients ( $\epsilon$ ) were calculated from Beer-Lambert law ( $A = \epsilon cl$ ) where optical path length ( $l$ ) was kept as 1 cm and micro molar concentration ( $c$ ) of the samples were maintained.

**Fluorescence Quantum Yield:** For calculating quantum yield, all the measurements were performed by maintaining the concentration of the samples and reference at a low value of 3  $\mu\text{M}$  to minimize error due to self-aggregation or self-quenching. The absorbance ( $A$ ) values of all the solutions were kept below 0.1. Reference dye quinine sulphate ( $\lambda_{\text{abs}} = 350 \text{ nm}$ ) in 0.5 M  $\text{H}_2\text{SO}_4$  ( $\Phi_{\text{R}} = 0.546$  at 298 K)<sup>1</sup> was used for measuring fluorescence quantum yields ( $\Phi_{\text{S}}$ ).

The quantum yield was calculated by using the following equation:<sup>2</sup>

$$\frac{\Phi_S}{\Phi_R} = \frac{\text{Abs}_R A_S \eta_S^2}{\text{Abs}_S A_R \eta_S^2}$$

Here  $\Phi$  denotes the quantum yield, (Abs) denotes the absorbance,  $A_S$  and  $A_R$  denotes the area under the fluorescence emission curve and  $\eta$  is the refractive index of the medium. The subscript S and R represent the corresponding parameters for the samples and reference, respectively.

**Time Resolved Decay Measurements:** The excited state lifetime decay trace was monitored using Deltaflex TCSPC module in the reverse mode having repetition rate 20 MHz & time scale 50 ns. The signal was detected at a magic angle ( $54.7^\circ$ ) using Photon Counting Detector (PPD 800). The excitation source was a picosecond diode laser unit with excitation wavelength 376 nm. The instrument response function (IRF) for 376 nm excitation laser in this TCSPC set up was  $\sim 230$  ps. The decay was collected in reverse mode and fitted using EzTime decay analysis software and using single exponential decay function.

$$I(t) = b + a \exp\left(-\frac{t}{\tau}\right)$$

Here, “b” is a baseline correction (“dc” offset), and “a” and “ $\tau$ ” are pre-exponential factor and excited-state fluorescence lifetime, respectively.

In all experiments, dichloromethane (DCM, spectroscopic grade, purchased from Spectrochem) was used as solvent. For photophysical studies, 2 mM solution of the photocatalyst (NC) was prepared in a sample vial by dissolving 0.0025 mmol of NC in 1.16 mL of DCM. The freshly prepared solution was used for the spectroscopic measurements. The required amount in micromolar concentration was taken using micro pipette from the mother solution as an aliquot and it was diluted further by dissolving in 2 mL of DCM in the cuvette such that the final micromolar concentration of catalyst will be optimum to obtain expected spectra for absorption and fluorescence measurements. For obtaining all the emission spectrum, 350 nm excitation light was used.

### Cyclic Voltammetry:<sup>3</sup>

Electrochemical potentials were obtained with a standard set of conditions to maintain internal consistency. Cyclic voltammetry (CV) and square wave voltammetry (SWV) measurements were performed (maintaining IUPAC convention) by using CH Instruments Electrochemical Analyzer/Workstation Model 660E Series. The polishing material used for the cyclic voltammetry experiments is named as Micropolish Powder 0.05 micron. To polish, small amount of alumina powder was put on the polishing pad and wet with distilled water. The electrode was hold vertically and firmly (did not apply too much pressure on this) while polishing. When the polishing pad get dry, distilled water was added and polished again. A standard three-electrode cell was employed with glassy carbon (3 mm diameter) as working electrode, platinum wire as auxiliary electrode and Ag/AgCl (KCl, 3M) as reference electrode; along with that tetra-*n*-butylammonium hexafluorophosphate ( $n\text{Bu}_4\text{NPF}_6$ ) was employed as supporting electrolyte. Scan rate was set to 100 mV/s. Samples were prepared with 0.0025 mmol of substrate in 6 mL of 0.1 M  $n\text{Bu}_4\text{NPF}_6$  in anhydrous acetonitrile and *N,N*-dimethylformamide solvent mixture (MeCN/DMF = 5:1 v/v, for enhancing solubility of the catalyst). Solutions were degassed with argon prior to measurements and experiments were performed under a protective atmosphere of argon. All potentials were measured relative to Ag/AgCl at 25 °C. The applied solvents are specified in the descriptions of the corresponding experiments. CV studies were also performed looking at variable scan rates (25 to 700 mV/s) to ultimately determine the reversibility of the catalysts.

The zero-zero vibrational state excitation energy  $E_{0,0}$  was estimated by the corresponding energy of the wavelength at which emission and absorption overlap. This wavelength was determined setting the intensity of emission  $\lambda_{\text{max}}$  to the absorbance at excitation wavelength (350 nm).  $E_{\text{ox}}$  and  $E_{\text{red}}$  are the ground state oxidation and reduction potentials which were determined from cyclic voltammetry experiments. Excited state oxidation potential ( $E_{\text{ox}}^*$ ) and excited state reduction potential ( $E_{\text{red}}^*$ ) were calculated by the following approximating formulas:

$$\text{(Excited state oxidation potential) } E_{\text{ox}}^* (\text{NC}^{\bullet+} / \text{NC}^*) = E_{\text{ox}} (\text{NC}^{\bullet+} / \text{NC}) - E_{0,0}$$

$$\text{(Excited state reduction potential) } E_{\text{red}}^* (\text{NC}^* / \text{NC}^{\bullet-}) = E_{\text{red}} (\text{NC} / \text{NC}^{\bullet}) + E_{0,0}$$

### Conversion of the potential from Ag/Ag<sup>+</sup> to SCE:

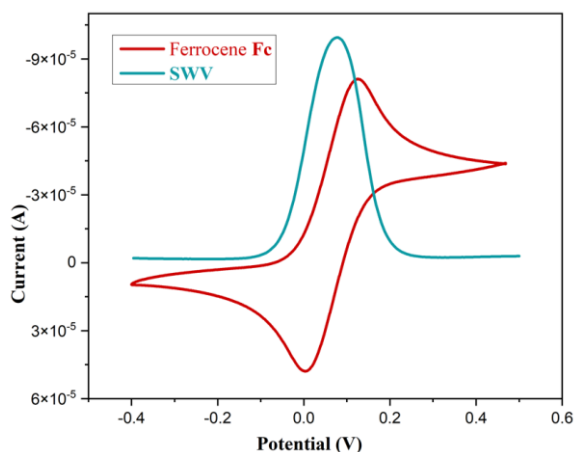

**Figure S3:** CV and SWV of Ferrocene vs Ag/Ag<sup>+</sup>

The conversion of the redox potential from Ag/AgCl to SCE was done according to the literature procedure<sup>4</sup> by measuring the redox potential for ferrocene as reference in similar solvent mixture (MeCN/DMF 5:1 v/v). From cyclic voltammetry, (Fig S3) we observed the redox potential of ferrocene (Fc): 0.07 V vs Ag/AgCl. With the reference CV, the redox potential vs SCE in MeCN/DMF 5:1 v/v was calculated using the following equations.

$$E_{1/2}(\text{NC}^{\bullet+}/\text{NC}) \text{ (vs Fc/Fc}^+) = (\text{Ground state oxidation potential of NC vs Ag/AgCl}) - 0.07$$

$$E_{1/2}(\text{NC}^{\bullet+}/\text{NC}) \text{ (vs SCE)} = (\text{Ground state oxidation potential of NC vs Fc/Fc}^+) + 0.38$$

$$E_{1/2}(\text{NC1}^{\bullet+}/\text{NC1}) = 0.753 \text{ V vs Ag/AgCl} = 1.063 \text{ V vs SCE}$$

$$E_{1/2}(\text{NC2}^{\bullet+}/\text{NC2}) = 0.724 \text{ V vs Ag/AgCl} = 1.034 \text{ V vs SCE}$$

$$E_{1/2}(\text{NC3}^{\bullet+}/\text{NC3}) = 0.696 \text{ V vs Ag/AgCl} = 1.006 \text{ V vs SCE}$$

$$E_{1/2}(\text{NC4}^{\bullet+}/\text{NC4}) = 0.776 \text{ V vs Ag/AgCl} = 1.086 \text{ V vs SCE}$$

$$E_{1/2}(\text{NC5}^{\bullet+}/\text{NC5}) = 0.904 \text{ V vs Ag/AgCl} = 1.214 \text{ V vs SCE}$$

$$E_{1/2}(\text{NC6}^{\bullet+}/\text{NC6}) = 0.844 \text{ V vs Ag/AgCl} = 1.154 \text{ V vs SCE}$$

**Table S1: Photoredox Properties of the Synthesized Photocatalysts**

| Catalyst (NC) | $\lambda_{abs,max}$ (nm) | $\epsilon^a$     | $\lambda_{em,max}$ (nm) | $\lambda_{inter}$ (nm) | $E_{0,0}$ (eV) | $\tau$ (ns) | $E_{ox}$ (V) | $E_{ox}^*$ (V) | $\Phi$ (%) |
|---------------|--------------------------|------------------|-------------------------|------------------------|----------------|-------------|--------------|----------------|------------|
| NC1           | 302, 370, 390            | 7.13, 0.71, 0.81 | 425                     | 399                    | 3.10           | 5.90        | 1.063        | -2.037         | 0.374      |
| NC2           | 302, 370, 390            | 6.38, 0.78, 0.84 | 425                     | 401                    | 3.09           | 5.78        | 1.034        | -2.056         | 0.371      |
| NC3           | 302, 370, 390            | 8.00, 0.86, 1.01 | 429                     | 402                    | 3.08           | 5.97        | 1.006        | -2.074         | 0.438      |
| NC4           | 302, 370, 390            | 5.10, 0.75, 0.83 | 426                     | 400                    | 3.10           | 5.59        | 1.086        | -2.014         | 0.385      |
| NC5           | 304, 369, 390            | 6.61, 0.53, 0.61 | 427                     | 398                    | 3.11           | 7.12        | 1.214        | -1.896         | 0.313      |
| NC6           | 303, 367, 386            | 3.70, 0.47, 0.52 | 423                     | 394                    | 3.15           | 6.11        | 1.154        | -1.996         | 0.618      |

<sup>a</sup> $\epsilon$  in units of  $10^4 \text{ M}^{-1} \text{ cm}^{-1}$ . <sup>b</sup>All the ground state potentials were calculated in SCE. ‘abs’ denotes absorbance and ‘em’ denotes emission.

## Photoredox Characteristics of Each Photocatalyst:

### 13-Methyl-7,8-diphenyl-13H-naphtho[2,1-a]carbazole (NC1):

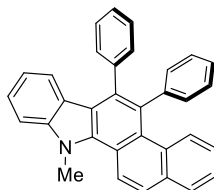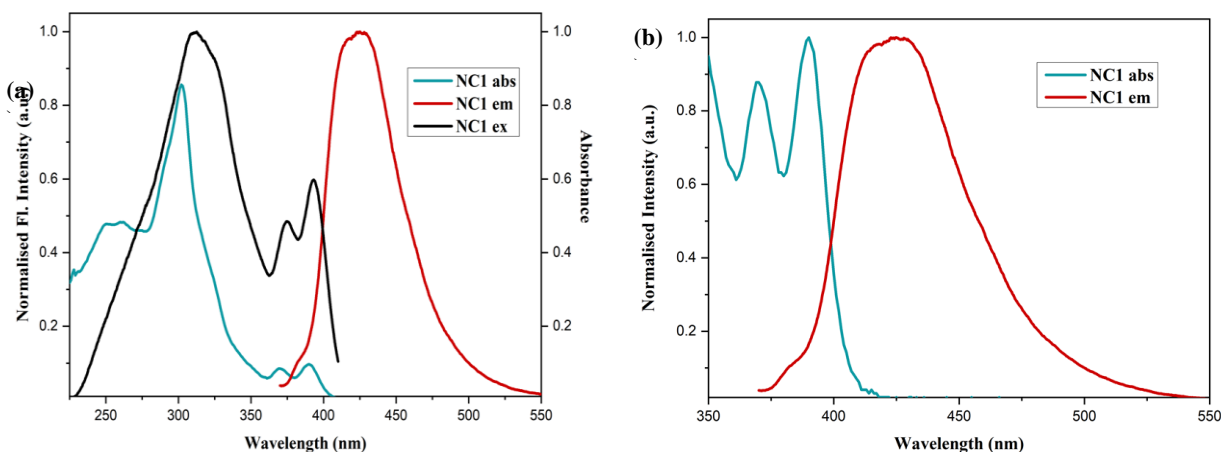

**Figure S4A:** (a) UV/Vis absorption (light cyan line), excitation (black line) and emission (red line) spectra of photocatalyst NC1 (12  $\mu$ M, in DCM). (b) Normalized absorption and emission spectra of NC1. Excitation wavelength  $\lambda_{max}$  in DCM = 350 nm, intersection wavelength  $\lambda_{intersection}$  = 399 nm;  $E_{0,0}$  = 1240/ $\lambda_{intersection}$  = 3.10 eV; Stokes shift = 35 nm.

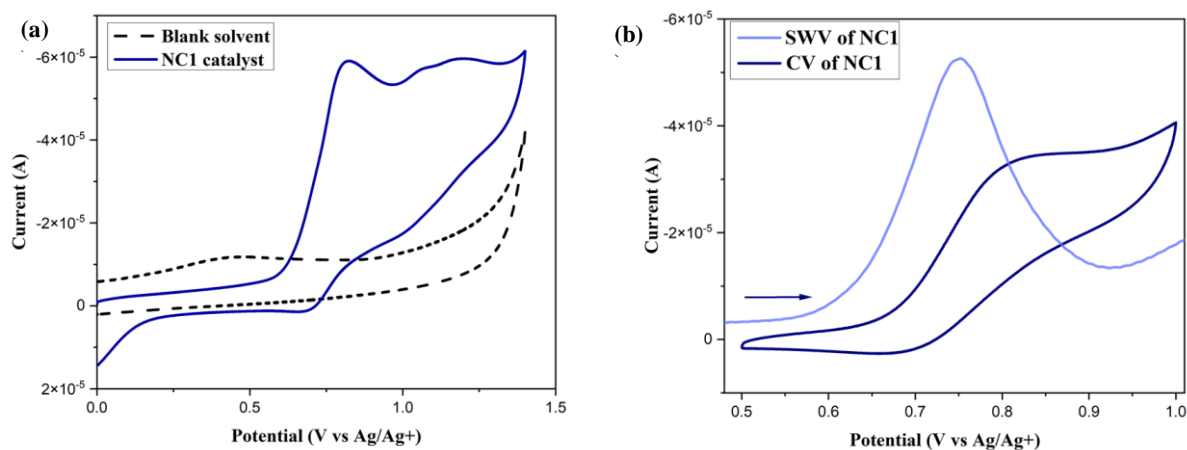

**Figure S4B:** (a, b) Cyclic voltammogram (CV) of NC1 (blue line), blank (dash black line) and square wave voltammetry (SWV) of NC1 (light blue line) in MeCN/DMF 5:1 v/v; concentration of analyte [NC1] =  $7.6 \times 10^{-4}$  M and electrolyte [ $n$ Bu $_4$ NPF $_6$ ] = 0.1 M; working electrode: glassy carbon, reference electrode: Ag/AgCl (3.0 M in KCl), counter electrode: platinum wire; for SWV frequency = 15 Hz, amplitude = 0.025 V; temperature = 25  $^{\circ}$ C.

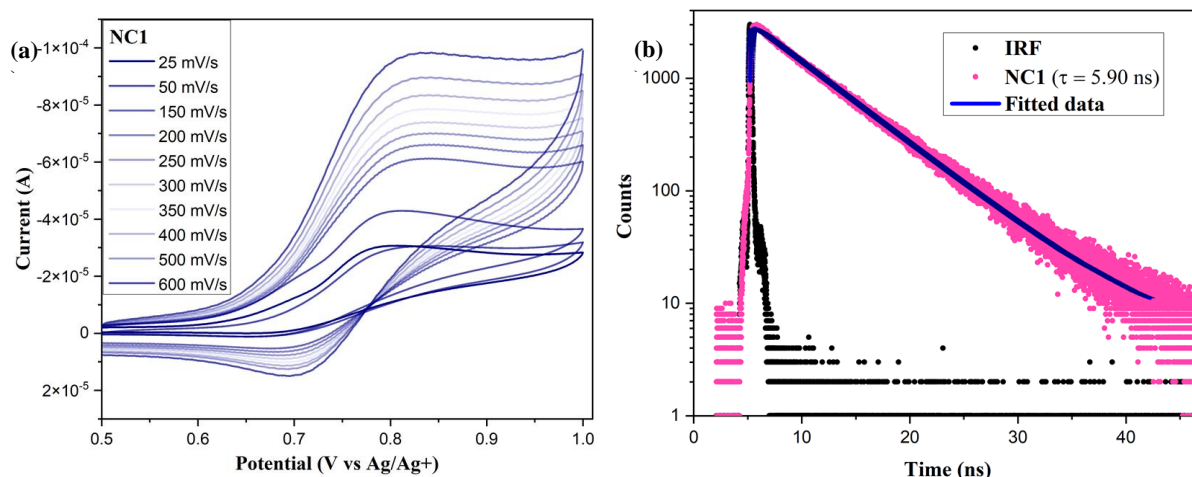

**Figure S4C:** (a) CV experiments at variable scan rates of NC1; (b) Fluorescence decay curve of NC1 in DCM (12  $\mu$ M). Lifetime  $\tau$  in DCM:  $5.90 \pm 0.01$  ns in DCM;  $\chi^2 = 1.359$ .

**8-(3-Methoxyphenyl)-13-methyl-7-phenyl-13H-naphtho[2,1-a]carbazole (NC2):**

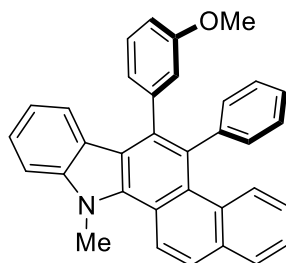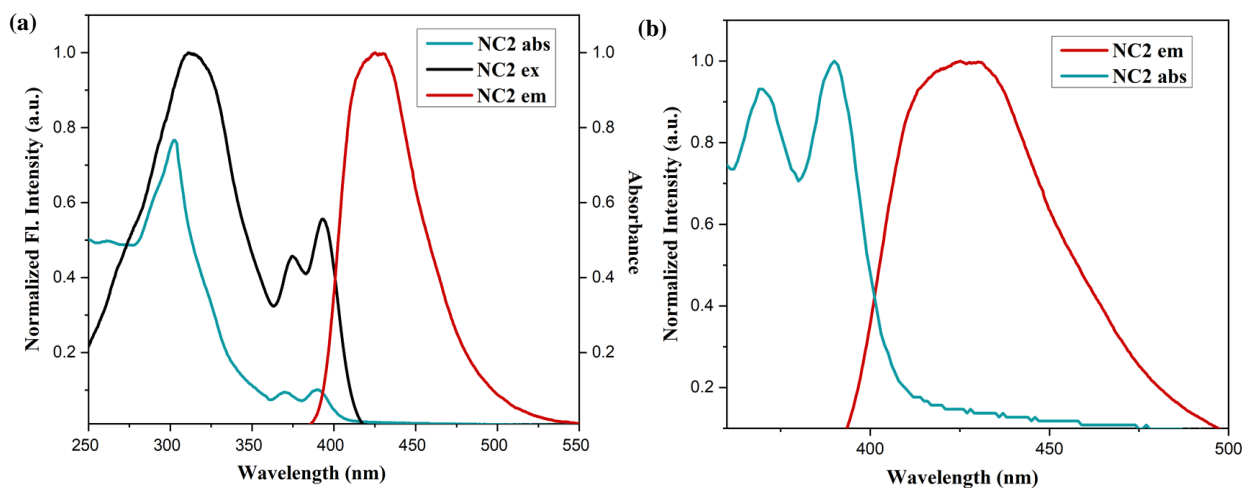

**Figure S5A:** (a) UV/Vis absorption (light cyan line), excitation (black line) and emission (red line) spectra of photocatalyst NC2 (12  $\mu$ M, in DCM), (b) Normalized absorption and emission spectra of NC2. Excitation wavelength  $\lambda_{max}$  in DCM = 350 nm, intersection wavelength  $\lambda_{intersection} = 401$  nm;  $E_{0,0} = 1240/\lambda_{intersection} = 3.09$  eV; Stokes shift = 35 nm.



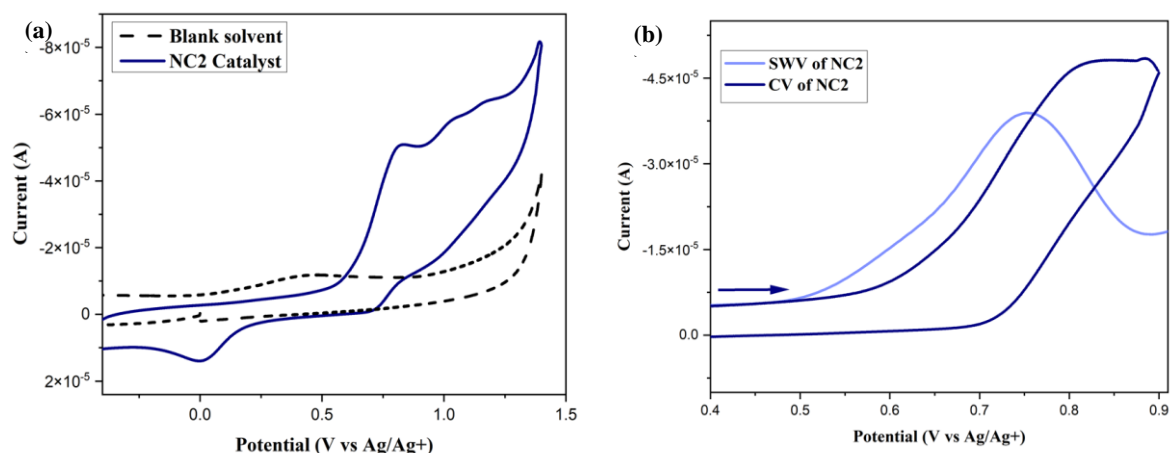

**Figure S5B:** (a, b) Cyclic voltammogram (CV) of NC2 (blue line), blank (dash black line) and square wave voltammetry (SWV) of NC2 (light blue line) in MeCN/DMF 5:1 v/v; concentration of analyte [NC2] =  $7.2 \times 10^{-4}$  M and electrolyte [ $n\text{Bu}_4\text{NPF}_6$ ] = 0.1 M; working electrode: glassy carbon, reference electrode: Ag/AgCl (3.0 M in KCl), counter electrode: platinum wire; for SWV frequency = 15 Hz, amplitude = 0.025 V; temperature = 25 °C.

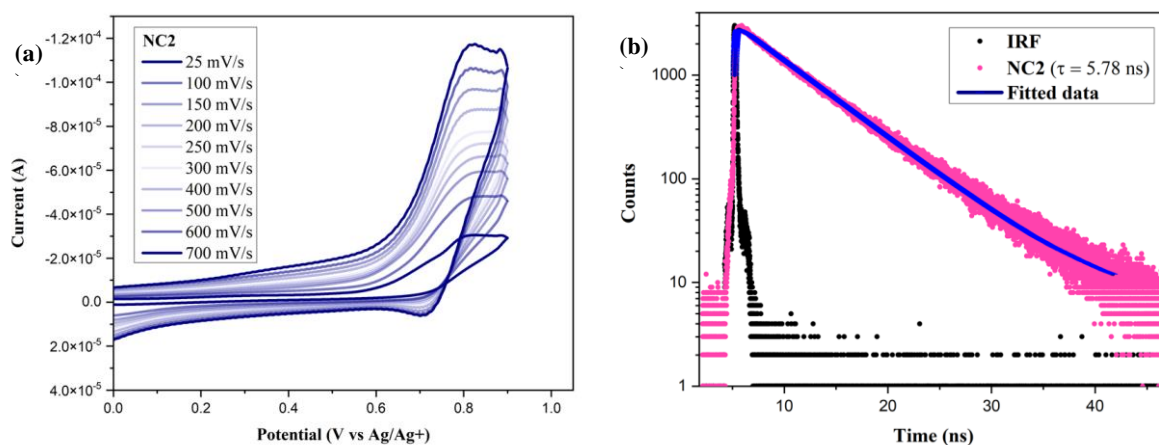

**Figure S5C:** (a) CV experiments at variable scan rates of NC2; (b) Fluorescence decay curve of NC2 in DCM (12  $\mu\text{M}$ ). Lifetime  $\tau$  in DCM:  $5.78 \pm 0.01$  ns in DCM;  $\chi^2 = 1.408$ .

**8-(4-Methoxyphenyl)-13-methyl-7-phenyl-13H-naphtho[2,1-a]carbazole (NC3):**

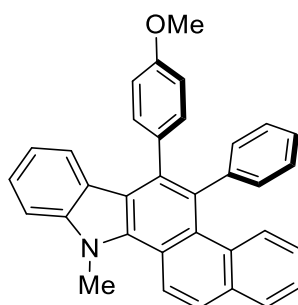

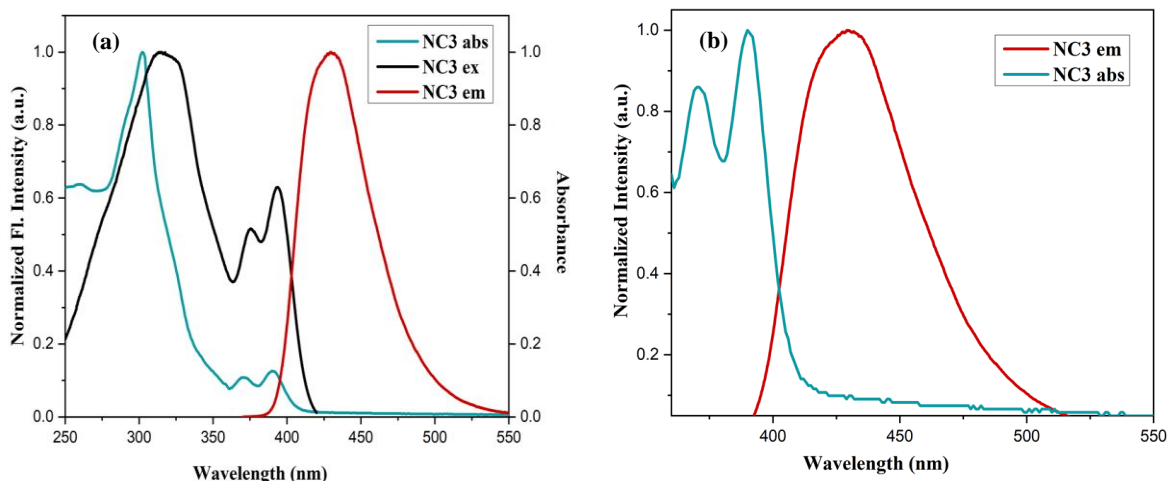

**Figure S6A:** (a) UV/Vis absorption (light cyan line), excitation (black line) and emission (red line) spectra of photocatalyst NC3 (12  $\mu\text{M}$ , in DCM), (b) Normalized absorption and emission spectra of NC3. Excitation wavelength  $\lambda_{\text{max}}$  in DCM = 350 nm, intersection wavelength  $\lambda_{\text{intersection}} = 402$  nm;  $E_{0,0} = 1240/\lambda_{\text{intersection}} = 3.08$  eV. Stokes shift = 39 nm.

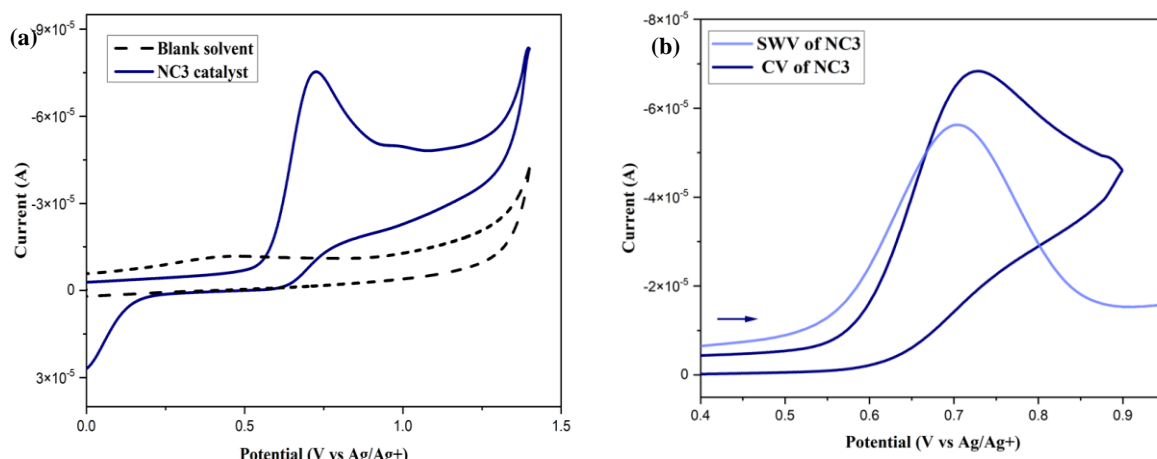

**Figure S6B:** (a, b) Cyclic voltammogram (CV) of NC3 (blue line), blank (dash black line) and square wave voltammetry (SWV) of NC3 (light blue line) in MeCN/DMF 5:1 v/v; concentration of analyte [NC3] =  $7.2 \times 10^{-4}$  M and electrolyte [ $n\text{Bu}_4\text{NPF}_6$ ] = 0.1 M; working electrode: glassy carbon, reference electrode: Ag/AgCl (3.0 M in KCl), counter electrode: platinum wire; for SWV frequency = 15 Hz, amplitude = 0.025 V; temperature = 25  $^\circ\text{C}$ .

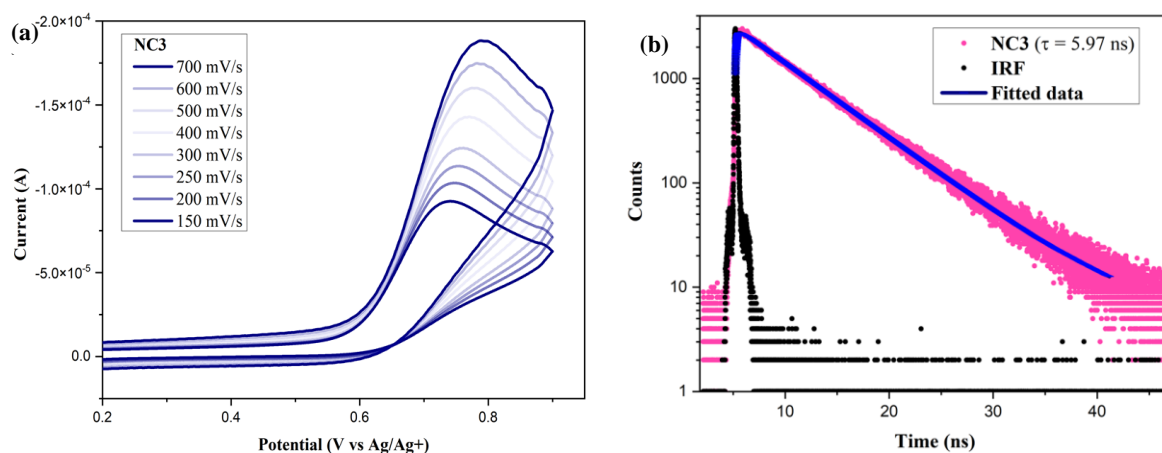

**Figure 6C:** (a) CV experiments at variable scan rates of NC3; (b) Fluorescence decay curve of NC3 in DCM (12  $\mu\text{M}$ ). Lifetime  $\tau$  in DCM:  $5.97 \pm 0.01$  ns in DCM;  $\chi^2 = 1.245$ .

**8-(4-Chlorophenyl)-13-methyl-7-phenyl-13H-naphtho[2,1-a]carbazole (NC4):**

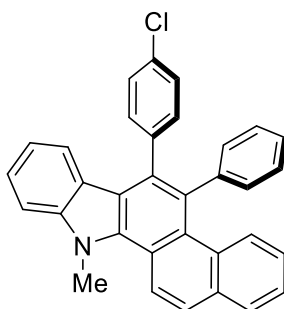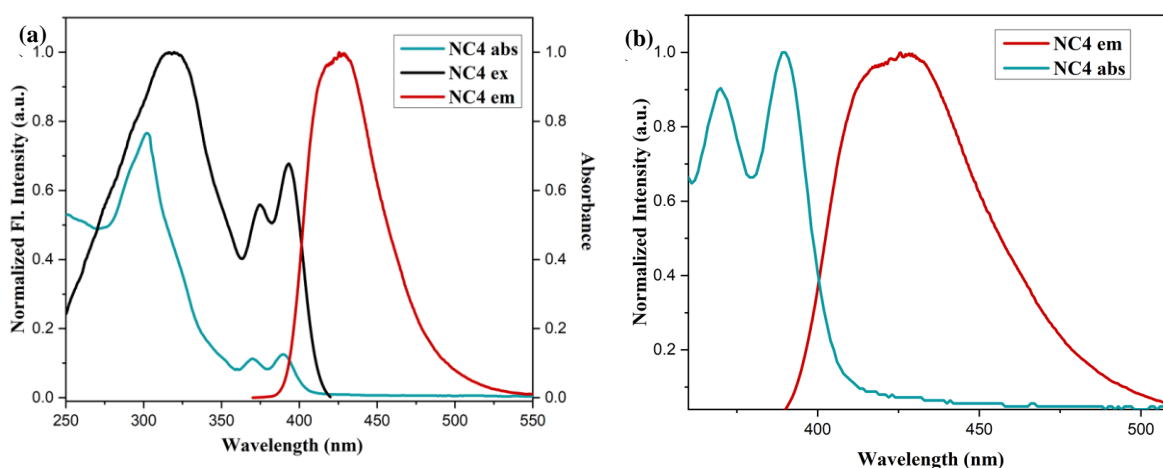

**Figure S7A:** (a) UV/Vis absorption (light cyan line), excitation (black line) and emission (red line) spectra of photocatalyst **NC4** (15  $\mu\text{M}$ , in DCM). (b) Normalized absorption and emission spectra of **NC4**. Excitation wavelength  $\lambda_{max}$  in DCM = 350 nm, intersection wavelength  $\lambda_{intersection}$  = 400 nm;  $E_{0,0}$  =  $1240/\lambda_{intersection}$  = 3.10 eV; Stokes shift = 35 nm.

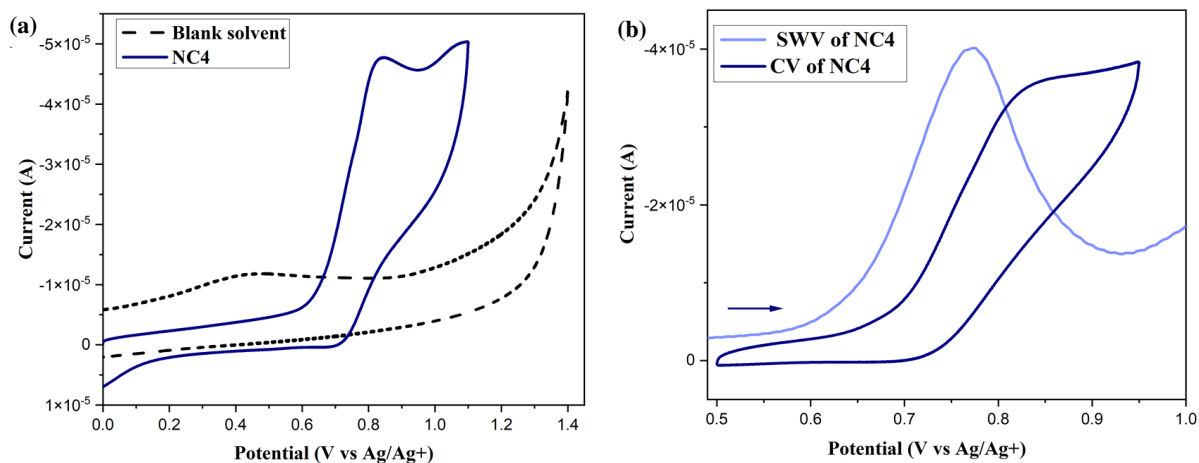

**Figure S7B:** (a, b) Cyclic voltammogram (CV) of **NC4** (blue line), blank (dash black line) and square wave voltammetry (SWV) of **NC4** (light blue line) in MeCN/DMF 5:1 v/v; concentration of analyte [**NC4**] =  $7.1 \times 10^{-4}$  M and electrolyte [ $n\text{Bu}_4\text{NPF}_6$ ] = 0.1 M; working electrode: glassy carbon, reference electrode: Ag/AgCl (3.0 M in KCl), counter electrode: platinum wire; for SWV frequency = 15 Hz, amplitude = 0.025 V; temperature = 25  $^\circ\text{C}$ .

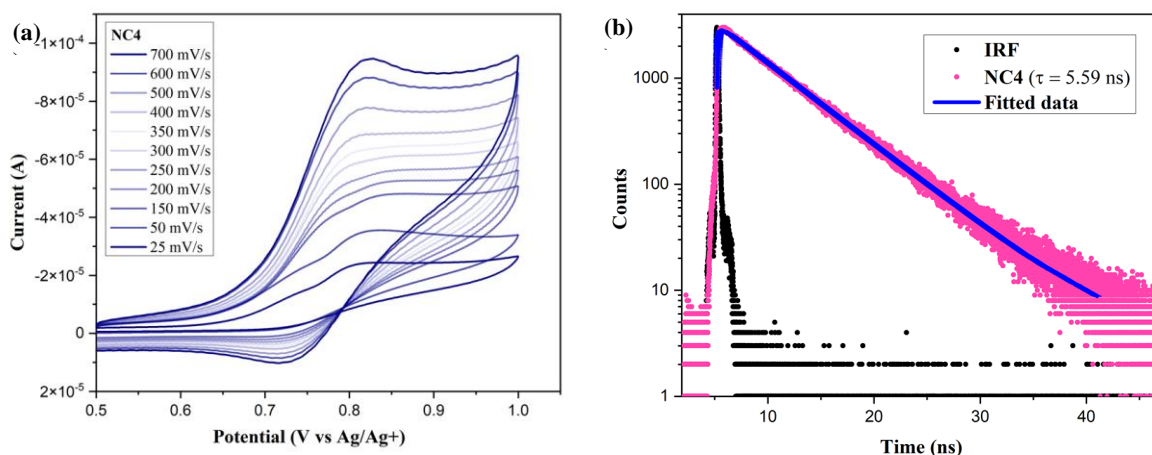

**Figure S7C:** (a) CV experiments at variable scan rates of NC4; (b) Fluorescence decay curve of NC4 in DCM (15  $\mu$ M). Lifetime  $\tau$  in DCM:  $5.59 \pm 0.01$  ns in DCM;  $\chi^2 = 1.173$ .

**13-Methyl-7,8-diphenyl-13H-naphtho[2,1-a]carbazole-10-carbonitrile (NC5):**

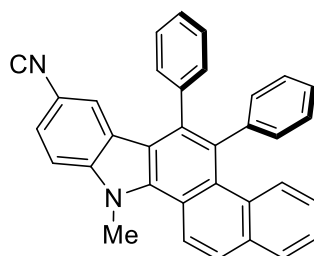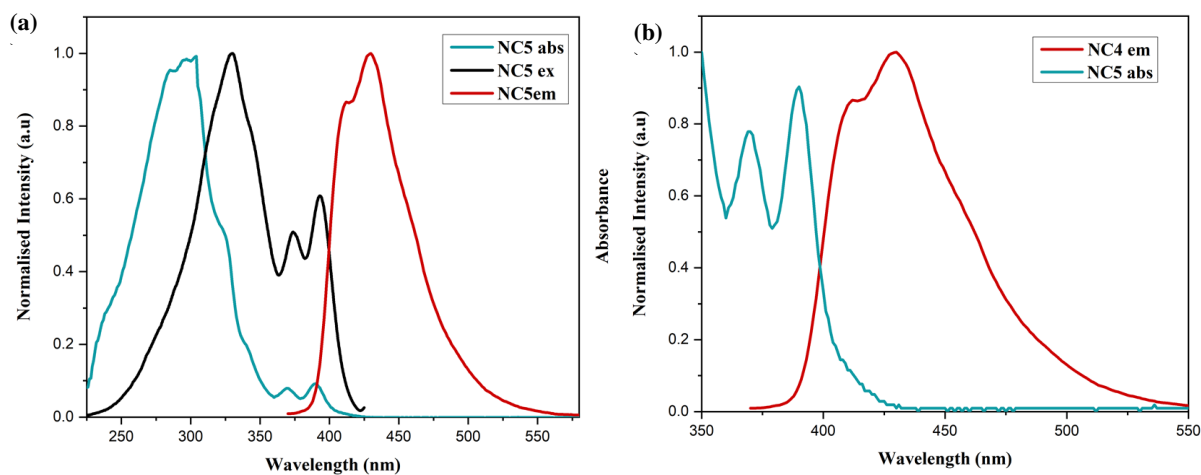

**Figure S8A:** (a) UV/Vis absorption (light cyan line), excitation (black line) and emission (red line) spectra of photocatalyst NC5 (15  $\mu$ M, in DCM). (b) Normalized absorption and emission spectra of NC5. Excitation wavelength  $\lambda_{max}$  in DCM = 350 nm, intersection wavelength  $\lambda_{intersection} = 398$  nm;  $E_{0,0} = 1240/\lambda_{intersection} = 3.11$  eV; Stokes shift = 36 nm.

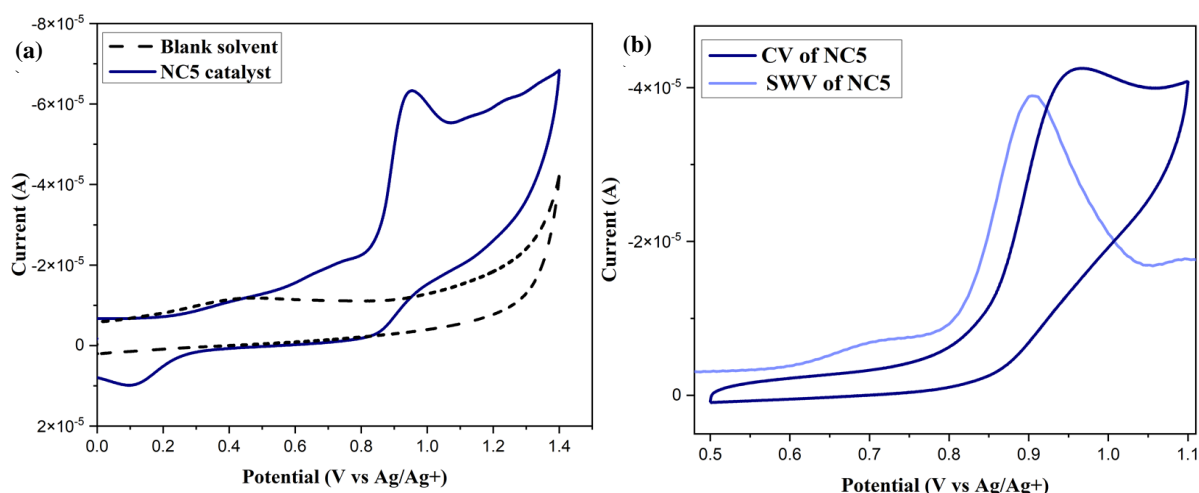

**Figure S8B:** (a, b) Cyclic voltammogram (CV) of NC5 (blue line), blank (dash black line) and square wave voltammetry (SWV) of NC5 (light blue line) in MeCN/DMF 5:1 v/v; concentration of analyte [NC5] =  $7.3 \times 10^{-4}$  M and electrolyte [ $n\text{Bu}_4\text{NPF}_6$ ] = 0.1 M; working electrode: glassy carbon, reference electrode: Ag/AgCl (3.0 M in KCl), counter electrode: platinum wire; for SWV frequency = 15 Hz, amplitude = 0.025 V; temperature = 25 °C.

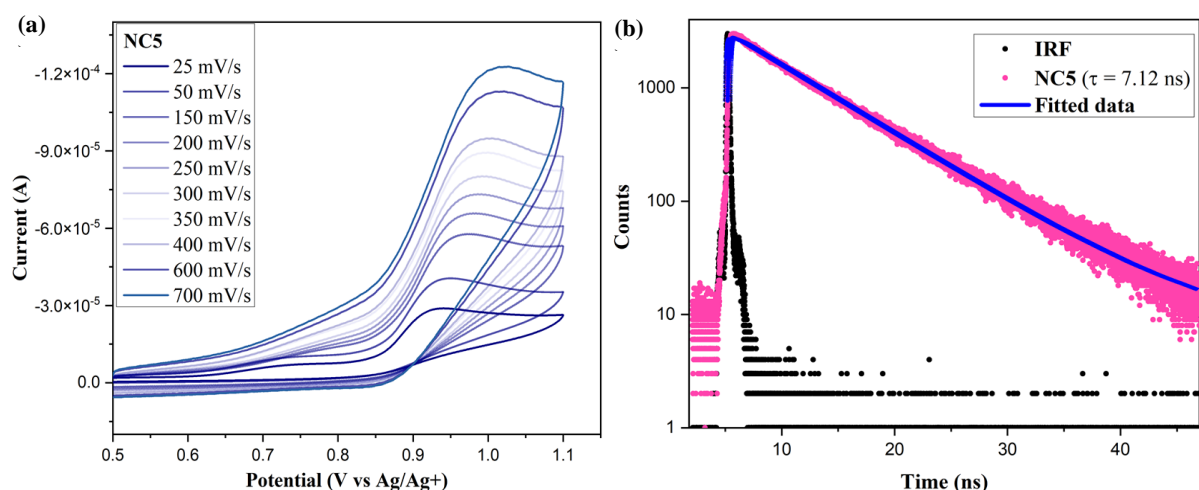

**Figure S8C:** (a) CV experiments at variable scan rates of NC5; (b) Fluorescence decay curve of NC5 in DCM (15 μM). Lifetime  $\tau$  in DCM:  $7.12 \pm 0.01$  ns in DCM;  $\chi^2 = 1.467$ .

**7,8,13-Triphenyl-13H-naphtho[2,1-a]carbazole (NC6):**

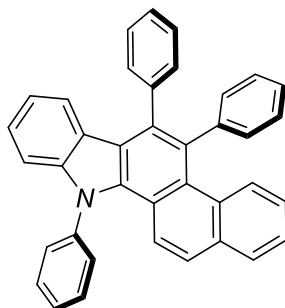

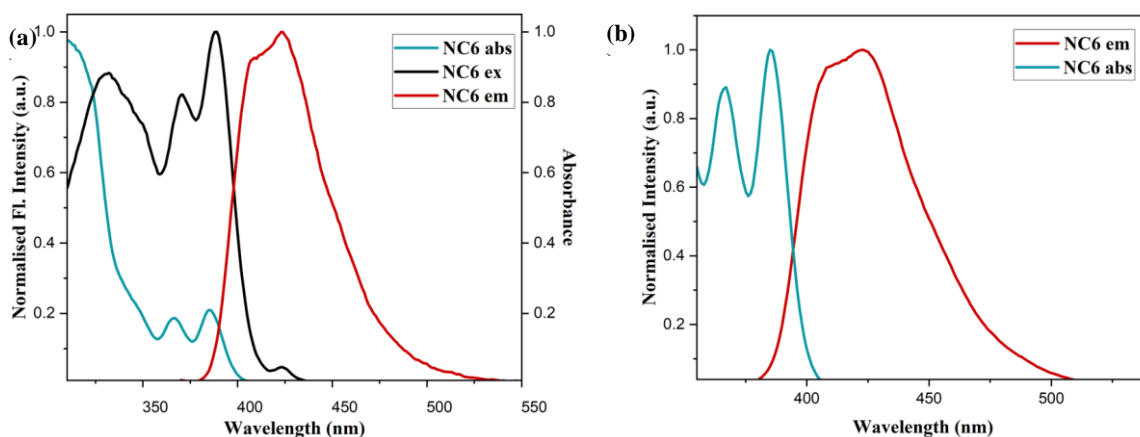

**Figure S9A:** (a) UV/Vis absorption (light cyan line), excitation (black line) and emission (red line) spectra of photocatalyst NC6(40 μM, in DCM). (b) Normalized absorption and emission spectra of NC6. Excitation wavelength  $\lambda_{max}$  in DCM = 350 nm, intersection wavelength  $\lambda_{intersection} = 394$  nm;  $E_{0,0} = 1240/\lambda_{intersection} = 3.15$  eV; Stokes shift = 37 nm.

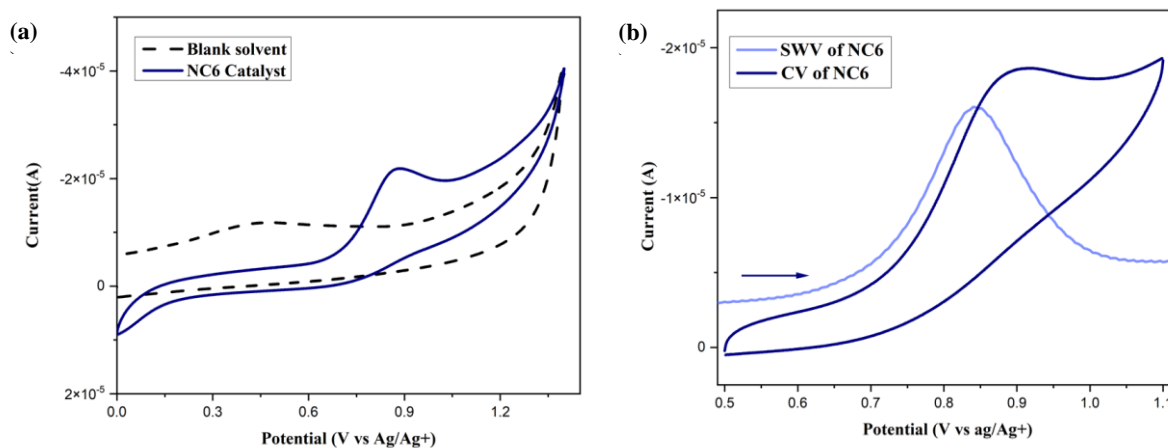

**Figure S9B:** (a, b) Cyclic voltammogram (CV) of NC6 (blue line), blank (dash black line) and square wave voltammetry (SWV) of NC6 (light blue line) in MeCN/DMF 5:1 v/v; concentration of analyte [NC6] =  $6.7 \times 10^{-4}$  M and electrolyte [ $n\text{Bu}_4\text{NPF}_6$ ] = 0.1 M; working electrode: glassy carbon, reference electrode: Ag/AgCl (3.0 M in KCl), counter electrode: platinum wire; for SWV frequency = 15 Hz, amplitude = 0.025 V; temperature = 25 °C

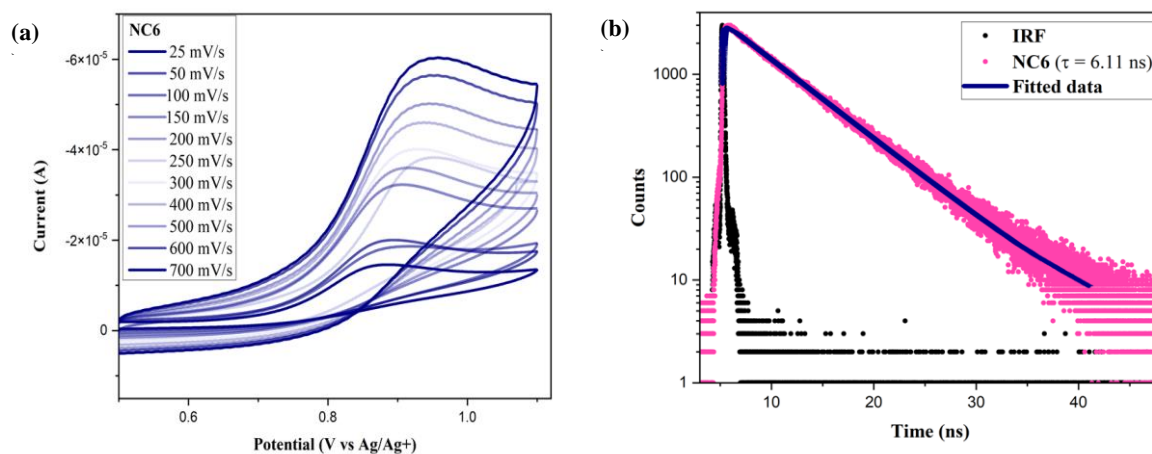

**Figure S9C:** (a) CV experiments at variable scan rates of NC6; (b) Fluorescence decay curve of NC6 in DCM (40 μM). Lifetime  $\tau$  in DCM:  $6.11 \pm 0.01$  ns in DCM;  $\chi^2 = 1.745$ .

### Luminescence Quenching Experiments:<sup>5</sup>

Preparation of the stock solution: A 2 mM solution of the photocatalyst was prepared in a sample vial by dissolving 0.0025 mmol of the respective NC catalyst in 1.16 mL of dry dichloromethane (DCM) (spectroscopic grade, purchased from Spectrochem). The freshly prepared solution was used for the spectroscopic measurement. The required amount (12  $\mu$ L) was taken using micro pipette from the mother solution as an aliquot and it was diluted further by dissolving in 2 mL of DCM in the cuvette such that the final concentration of photocatalyst was 3  $\mu$ M. Similarly, 0.24 mL 1 M solution of 1-bromo-4-methylbenzene (**1a**), *N*-(2-bromophenyl)-*N*-methylbenzamide (**4a**), acetophenone (**6g**), 1-((4-(*tert*-butyl)phenyl)sulfonyl)-1*H*-indole (**10f**) and 0.35 mL 1 M solution of *N,N*-diisopropylethylamine (DIPEA) were prepared by dissolving the requisite amount of each quencher in dry, degassed DCM. Freshly prepared those solutions were used for the quenching experiments.

**Experimental procedures:** Fluorescence emission spectra of the photocatalyst in absence and presence of different reactions components were recorded and analysed in detail to estimate the light emission properties of the pure catalyst system and their distractions by external interference from the substrates. Emission intensities of photocatalyst were recorded with a “Hitachi F-7000 FL Spectrophotometer” using 10.0 mm quartz cuvette. The sample solution of NC with a proper concentration of in DCM (degassed under inert atmosphere of argon for 5 minutes before recording the spectra) was excited at the wavelength of 350 nm and to observe quenching, the fluorescence intensity was monitored at  $\lambda_{em,max}$  (425 nm for NC1 and 429 nm for NC3). The individual substrate and DIPEA did not show any emission in that region. To study the quenching behaviour of photocatalyst, small aliquots of substrate was progressively added to the catalyst solution and the emission spectra were measured following the aforementioned procedure. Few sets of solutions with different concentration of quencher were used; the experiments were repeated and finally the Stern-Volmer plot was obtained according to the following equation.

$$\frac{F_0}{F} = 1 + K_{SV} [Q]$$

Where,  $F_0$  and  $F$  are fluorescence intensities at  $\lambda_{em,max}$  of respective catalyst in absence and presence of quencher,  $[Q]$  is corresponding molar concentration of quencher and  $K_{SV}$  is the Stern-Volmer constant. DIPEA was found to be comparatively less effective to facilitate

quenching of the emission of the catalyst. The corresponding Stern-Volmer plot was illustrated for all the cases (Fig S10 - Fig S13).

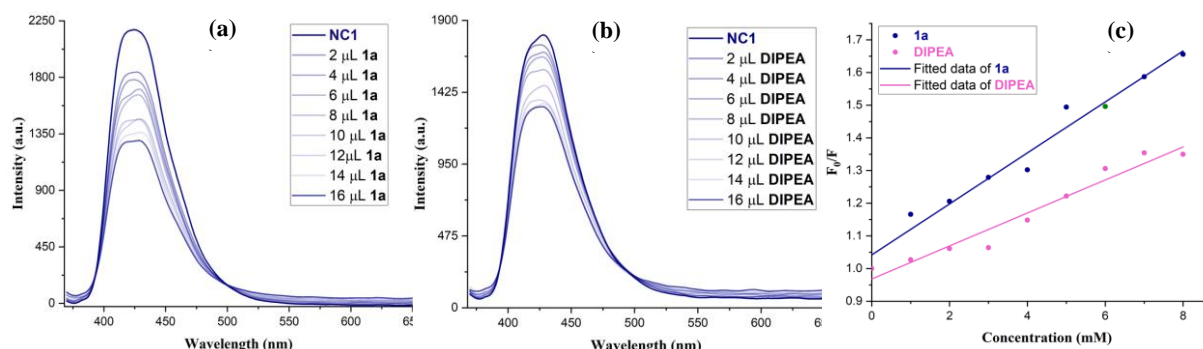

**Figure S10:** (a, b) Fluorescence quenching study of NC1 catalyst with 1-bromo-4-methylbenzene **1a** and DIPEA for borylation reaction. (c) Stern-Volmer Plot of NC1 catalyst in presence of 1-bromo-4-methylbenzene **1a** and amine DIPEA separately.

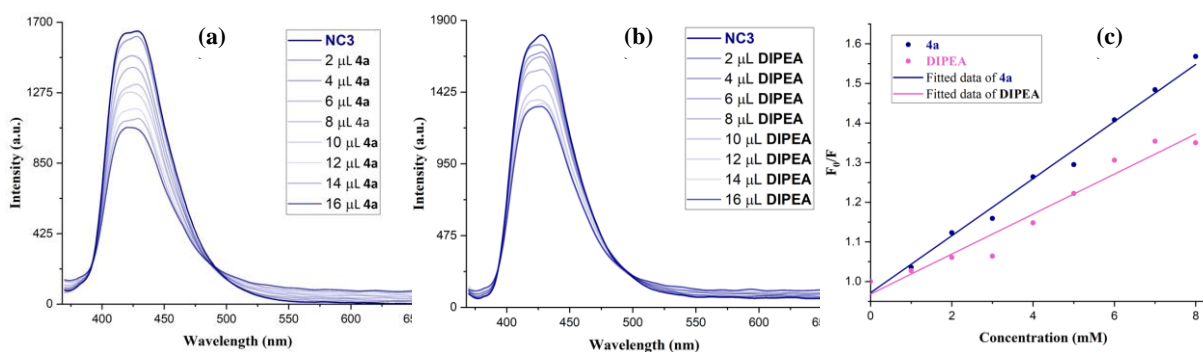

**Figure S11:** (a, b) Fluorescence quenching study of NC3 catalyst with *N*-(2-bromophenyl)-*N*-methylbenzamide (**4a**) and DIPEA, respectively. (c) Stern-Volmer Plot of NC3 catalyst in presence of *N*-(2-bromophenyl)-*N*-methylbenzamide (**4a**) and amine DIPEA separately.

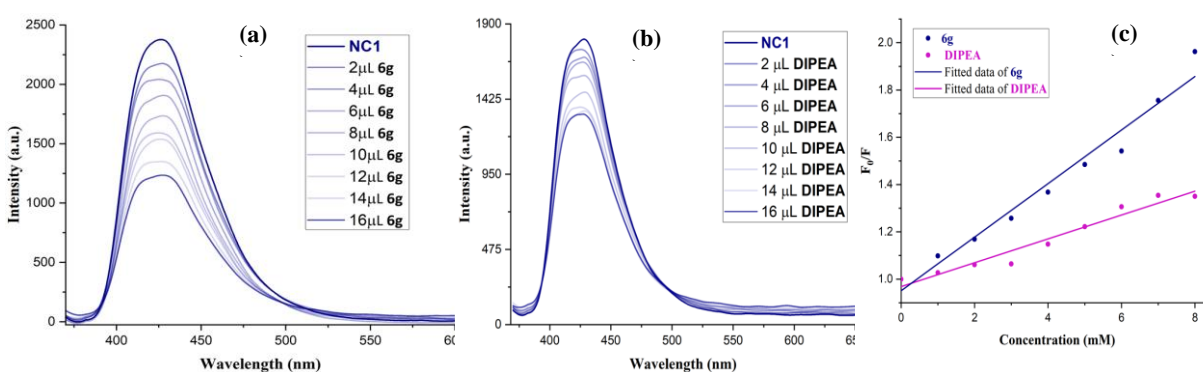

**Figure S12:** (a, b) Fluorescence quenching study of NC1 catalyst with acetophenone (**6g**) and DIPEA, respectively. (c) Stern-Volmer Plot of NC1 catalyst in presence of acetophenone (**6g**) and amine DIPEA separately.



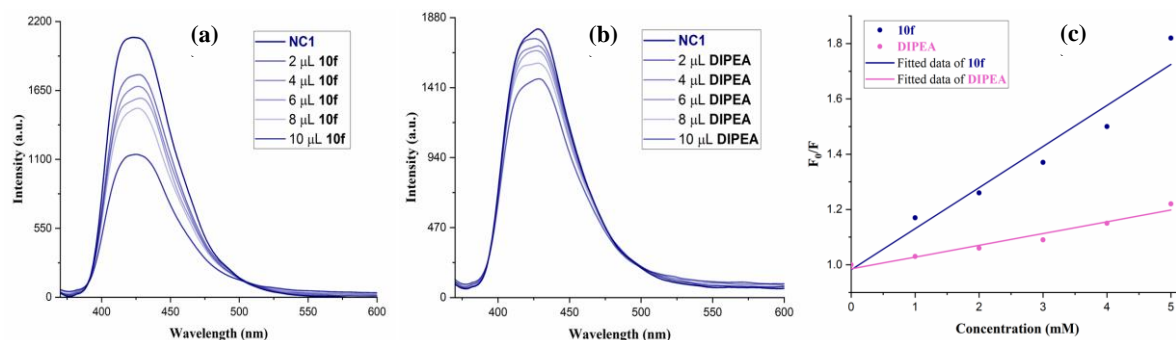

**Figure S13:** (a, b) Fluorescence quenching study of NC1 catalyst with -((4-(*tert*-butyl)phenyl)sulfonyl)-1*H*-indole (**10f**) and DIPEA, respectively. (c) Stern-Volmer Plot of NC1 catalyst in presence of -((4-(*tert*-butyl)phenyl)sulfonyl)-1*H*-indole (**10f**) and amine DIPEA separately.

### General Procedure for the Synthesis of Photocatalysts (NC1-NC4) (GP-I):

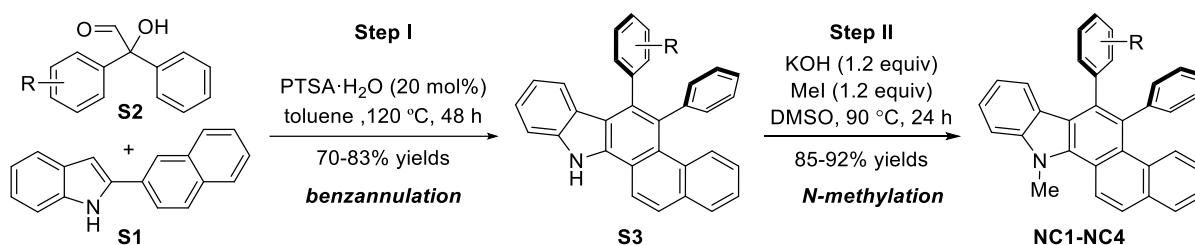

2-Naphthylindole **S1** and di-aryl  $\alpha$ -hydroxyl aldehydes **S2** were synthesized according to the literature procedures.<sup>6a,6b</sup>

The photocatalysts **NC1-NC4** were synthesized according to the modified reported literature procedure.<sup>6b</sup>

**Step I:** In a 100 mL round bottom flask, 2-(naphthalen-2-yl)-1*H*-indole **S1** (2.43 g, 10.0 mmol, 1.0 equiv) and *p*-toluenesulfonic acid monohydrate (380 mg, PTSA·H<sub>2</sub>O, 2.0 mmol, 20 mol%) were dissolved in 30 mL of toluene by stirring at room temperature for 5 min. Then, di-aryl  $\alpha$ -hydroxyl aldehydes **S2** (11.0 mmol, 1.1 equiv) were added to it and the reaction mixture was heated to reflux at 120 °C for 48 h with constant stirring. Upon completion of the reaction (as monitored by TLC, the products are KMnO<sub>4</sub> and DNP active), the crude reaction mixture was diluted with ethyl acetate and the solvent was evaporated under reduced pressure. The substituted benzo[*a*]carbazoles **S3** were isolated (70-83% yields) as yellow solid after silica gel column chromatography using ethyl acetate in hexane as eluent and were used for the next step.

**Step II:** In a 50 mL round bottom flask, substituted benzo[*a*]carbazole **S3** (5.0 mmol, 1.0 equiv) was dissolved in 15 mL dimethyl sulfoxide (DMSO) by stirring at room temperature for 5 min. Then potassium hydroxide (KOH, 336.63 mg, 6.0 mmol, 1.2 equiv) was added to the reaction mixture and stirring was continued for another 30 min at room temperature. After that, methyl

iodide (0.47 mL, 7.5 mmol, 1.5 equiv) was added to it at the same temperature and the reaction mixture was heated to reflux at 90 °C for overnight with constant stirring. Upon completion of the reaction (as indicated by TLC), sufficient amount of cold water was added to the reaction mixture and extracted with ethyl acetate (3 x 20 mL). The organic layers were dried over anhydrous Na<sub>2</sub>SO<sub>4</sub> and evaporated under reduced pressure. The crude residue was purified by silica gel column chromatography using ethyl acetate in hexane as eluent to afford desired photocatalysts NCs in 85-92% yields.

**Procedure for the Synthesis of Photocatalyst 13-Methyl-7,8-diphenyl-13*H*-naphtho[2,1-*a*]carbazole-10-carbonitrile (NC5):**

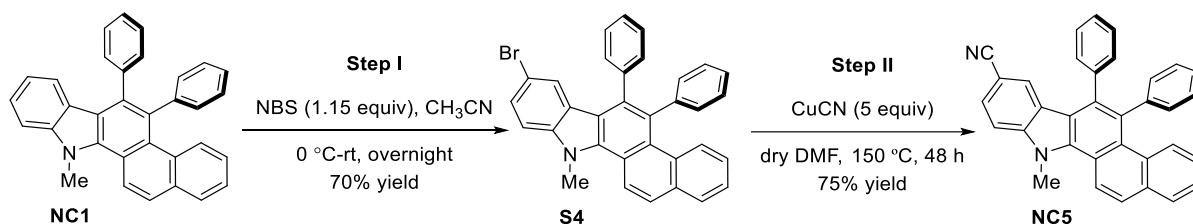

The photocatalyst **NC4** was synthesized according to the modified reported literature procedures.<sup>7a-7b</sup>

**Step I:** In a 50 mL round bottom flask, 13-methyl-7,8-diphenyl-13*H*-naphtho[2,1-*a*]carbazole **NC1** (433 mg, 1.0 mmol, 1.0 equiv) was dissolved in 15 mL acetonitrile (CH<sub>3</sub>CN) at room temperature by stirring for 10 min. After that, reaction mixture was cool down to 0 °C and *N*-bromosuccinimide (NBS, 204 mg, 1.15 mmol, 1.15 equiv, dissolved in 15 mL acetonitrile) was added dropwise to it at the same temperature, and stirring was continued for another 30 min. Then the reaction mixture was allowed to reach room temperature and stirred for overnight. Upon completion (as monitored by TLC), reaction mixture was quenched with water and extracted with ethyl acetate (3 x 12 mL). The organic layers were dried over anhydrous Na<sub>2</sub>SO<sub>4</sub> and evaporated under reduced pressure. The crude product was purified by silica gel column chromatography using 2% ethyl acetate in hexane as eluent to afford the desired product 10-bromo-13-methyl-7,8-diphenyl-13*H*-naphtho[2,1-*a*]carbazole **S4** in 70% yield and used for the next step.

**Step II:** The *N*-methylated bromocarbazole **S4** (512 mg, 1.0 mmol, 1.0 equiv) was taken in a 30 mL screw capped sealed tube and 10 mL anhydrous *N,N*-dimethylformamide (DMF) solvent was added. The resulting suspension was then stirred for 10 min until complete dissolution of starting material **S4**. After that, copper(I) cyanide (CuCN, 448 mg, 5.0 mmol, 5.0 equiv, dissolved in 5 mL anhydrous DMF) was added to the reaction mixture, the sealed tube was

closed with a screw cap and stirring was continued for 5 min at room temperature. Finally, the temperature of the oil bath was gradually increased to 150 °C (over 15 min) before stirring the reaction mixture at the same temperature for 48 h. After completion (as monitored by TLC), the reaction was cool down to room temperature and poured into a cold solution of ferric chloride (7.5 g of FeCl<sub>3</sub> dissolved in 23 mL of concentrated hydrochloric acid) and the crude reaction mixture was stirred for another 2 h at room temperature. A brown solid precipitate was generated, collected by filtration and washed with water. Then the residue was dissolved in 30 mL dichloromethane (DCM) and the accumulated filtrate was concentrated under vacuum. Then the crude product was directly purified by silica gel column chromatography using 30% ethyl acetate in hexane as eluent to obtain the desired product 13-methyl-7,8-diphenyl-13*H*-naphtho[2,1-*a*]carbazole-10-carbonitrile **NC5** as light yellow solid (344 mg, 75% yield). <sup>1</sup>H NMR (500 MHz, CDCl<sub>3</sub>): δ (ppm) 8.65 (d, *J* = 9.2 Hz, 1H), 7.88 (dd, *J* = 8.3, 4.6 Hz, 2H), 7.70 (d, *J* = 8.8 Hz, 1H), 7.62 (dd, *J* = 8.5, 1.0 Hz, 1H), 7.51 (d, *J* = 8.6 Hz, 1H), 7.43 (t, *J* = 7.3 Hz, 1H), 7.35 – 7.30 (m, 3H), 7.21 – 7.18 (m, 3H), 7.12 – 7.09 (m, 4H), 7.06 (t, *J* = 7.8 Hz, 1H), 6.80 (s, 1H), 4.41 (s, 3H). <sup>13</sup>C{<sup>1</sup>H} NMR (126 MHz, CDCl<sub>3</sub>): δ (ppm) 144.1, 142.8, 139.8, 137.4, 136.7, 133.0, 132.8, 131.6, 130.08, 129.7, 129.2, 128.4, 128.34, 128.29, 128.2, 127.44, 127.35, 127.0, 126.5, 126.1, 125.0, 123.3, 120.6, 120.3, 119.1, 109.8, 102.4, 35.5. FTIR: (neat)/ cm<sup>-1</sup> = 3055, 2952, 2854, 2220, 1954, 1883, 1744, 1610, 1524, 1478, 1441, 1384, 1208, 1128. HRMS (ESI) *m/z*: [M+H]<sup>+</sup> calcd for C<sub>34</sub>H<sub>23</sub>N<sub>2</sub>, 459.1856; found 459.1864.

**Procedure for the Synthesis of Photocatalyst 7,8,13-triphenyl-13*H*-naphtho[2,1-*a*]carbazole (NC6):**

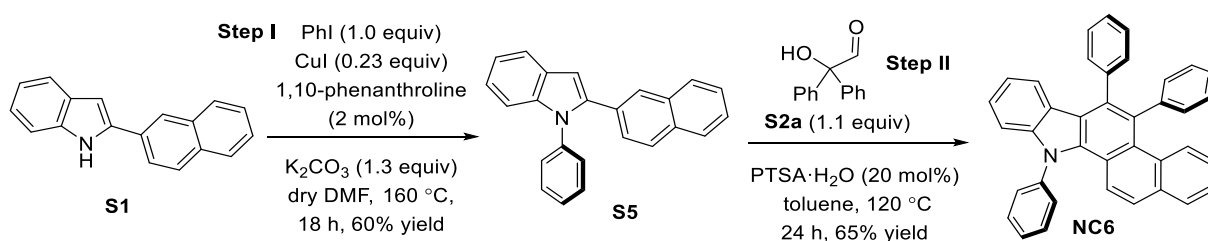

The photocatalyst **NC6** was synthesized according to the modified reported literature procedures.<sup>8,6b</sup>

**Step I:** In a 50 mL two necked round bottom flask, 2-naphthylindole **S1** (1.2 g, 5.0 mmol, 1.0 equiv), K<sub>2</sub>CO<sub>3</sub> (898 mg, 6.5 mmol, 1.3 equiv), copper iodide (CuI, 219 mg, 1.15 mmol, 0.23 equiv), and 1,10-Phenanthroline (20 mg, 0.1 mmol, 2 mol%) were taken. Then the system was evacuated and back-filled with argon (repeated twice). To the reaction flask, 13 mL anhydrous DMF was added under positive argon atmosphere and the solution was stirred for 20 min under

constant purging with argon gas applied through an Ar-filled balloon (to degas the resulting solution). After that iodobenzene (PhI, 0.6 mL, 5 mmol, 1.0 equiv) was added to the reaction mixture at room temperature and the stirring was continued for another 10 min. Then, the reaction mixture was heated to reflux at 160 °C maintaining inert atmosphere while constant stirring for 18 h. Upon completion of the reaction (as monitored by TLC), cold water was added to quench the reaction mixture and extracted with ethyl acetate (3 x 20 mL). The organic layer was then washed with saturated ammonium chloride (aq. NH<sub>4</sub>Cl) followed by brine. The organic layer was dried over anhydrous Na<sub>2</sub>SO<sub>4</sub> and evaporated under reduced pressure. Then the crude residue was directly purified by silica gel column chromatography using 1% ethyl acetate in hexane as eluent to afford the desired product **S5** and used for the next step (0.96 g, 60% yield).

**Step II:** In a 15 mL culture tube, **S5** (319 mg, 1.0 mmol, 1.0 equiv) and *p*-toluenesulfonic acid monohydrate (38 mg, PTSA·H<sub>2</sub>O, 0.2 mmol, 20 mol%) were dissolved in 30 mL of toluene by stirring at room temperature for 5 min. Then, di-phenyl  $\alpha$ -hydroxyl aldehyde **S2a** (299 mg, 1.1 mmol, 1.1 equiv) was added and the resulting reaction mixture was heated to reflux at 120 °C for 48 h with constant stirring. Upon completion of the reaction (as monitored by TLC, the products are KMnO<sub>4</sub> and DNP active), the crude reaction mixture was diluted with ethyl acetate, transferred to a 25 mL round-bottomed flask and the solvent was evaporated under reduced pressure. The crude residue was purified by using silica gel column chromatography using hexane as eluent to afford 7,8,13-triphenyl-13*H*-naphtho[2,1-*a*]carbazole **NC6** as yellow solid (322 mg, 65% yield). **<sup>1</sup>H NMR** (500 MHz, CDCl<sub>3</sub>):  $\delta$  (ppm) 7.75 (d, *J* = 7.8 Hz, 1H), 7.70 – 7.68 (m, 3H), 7.66 – 7.64 (m, 2H), 7.61 (d, *J* = 7.4 Hz, 2H), 7.50 (d, *J* = 9.1 Hz, 1H), 7.37 – 7.34 (m, 4H), 7.32 – 7.30 (m, 3H), 7.21 – 7.20 (m, 6H), 7.03 – 7.00 (m, 1H), 6.98 (t, *J* = 7.5 Hz, 1H), 6.64 (d, *J* = 7.9 Hz, 1H). **<sup>13</sup>C {<sup>1</sup>H} NMR** (126 MHz, CDCl<sub>3</sub>):  $\delta$  (ppm) 143.6, 143.4, 141.0, 140.9, 136.9, 136.3, 133.0, 132.1, 131.9, 131.7, 130.6, 130.4, 129.0, 128.74, 128.66, 128.3, 128.2, 128.1, 126.8, 126.23, 126.21, 125.6, 125.5, 124.7, 123.5, 122.2, 121.4, 120.4, 120.3, 120.1, 110.3. **FTIR:** (neat)/ cm<sup>-1</sup> = 3746, 3645, 3049, 2325, 2163, 2080, 1966, 1907, 1826, 1744, 1591, 1496, 1452, 1389, 1316, 1204, 1140. **HRMS (ESI) *m/z*:** [M+H]<sup>+</sup> calcd for C<sub>38</sub>H<sub>26</sub>N, 496.2060; found 496.2060.

**Synthesis of Bromoarene Precursors:** Bromoarenes were used as received from commercial sources without further purification. Bromoarene **1n**, **1s** and **1t** were synthesised according to the literature procedures.<sup>9a-9c</sup>

**General Procedure for the Synthesis of *ortho*-Bromo Substituted *N*-Aryl Benzamide Derivatives 4a-4m (GP-II):<sup>10a,10b</sup>**

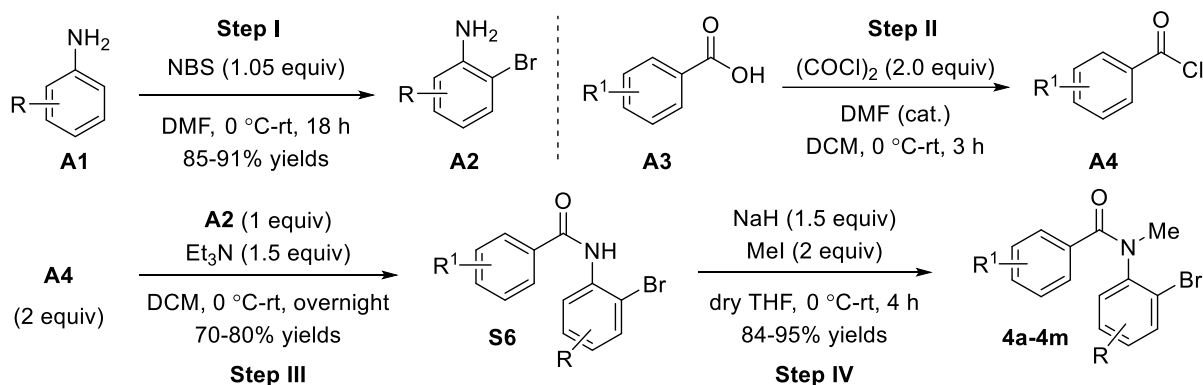

**Step I:** According to literature procedures, in a 50 mL round bottom flask, aniline derivatives **A1** (5.0 mmol, 1.0 equiv) were dissolved in 10 mL *N,N*-dimethylformamide (DMF) by stirring at room temperature for 10 min. After that, the resulting solution was cool down to 0 °C and *N*-bromosuccinimide (NBS, 0.94 g, dissolved in 5 mL DMF) was added portion wise and stirring was continued for another 30 min at the same temperature. The reaction mixture was allowed to reach room temperature gradually and stirring was continued for 18 h at the same temperature. Upon completion of the reaction (as monitored by TLC), the reaction mixture was quenched with cold water and extracted with ethyl acetate (3 x 10 mL). The organic layers were dried over anhydrous Na<sub>2</sub>SO<sub>4</sub> and evaporated under reduced pressure. The crude residue was purified by silica gel chromatography by using ethyl acetate in hexane as eluent to afford the *ortho*-bromoaniline derivatives **A2** in 85-91% yields.

**Step II:** In a 25 mL round bottom flask, aryl carboxylic acid derivative **A3** (3.0 mmol, 1.0 equiv) was dissolved in dichloromethane (DCM) (9.9 mL, 0.3 M) and catalytic amount of *N,N*-dimethylformamide (DMF, 3 drops) was added dropwise and stirring was continued for 10 min. Then the solution was cool down to 0 °C and to this mixture, oxalyl chloride (0.53 mL, 6.0 mmol, 2.0 equiv) was added dropwise at the same temperature. After that, the reaction mixture was allowed to reach room temperature and stirring was continued for another 3 h. Upon completion of the reaction (as monitored by TLC), the resulting reaction mixture was concentrated under reduced pressure to afford the acyl chloride derivatives **A4** as a yellow slurry which was used for the next step without further purification.

**Step III:** In a 25 mL round bottom flask, *ortho*-bromoaniline derivative **A2** (1.5 mmol, 1.0 equiv) was dissolved in 5 mL of DCM at room temperature by stirring for 10 min. After that reaction mixture was cool down to 0 °C, triethylamine (0.3 mL, 2.25 mmol, 1.5 equiv) was

added dropwise and stirring was continued for another 30 min at same temperature. Then, previously prepared acyl chloride derivative **A4** (3 mmol, 2.0 equiv, dissolved in 5 mL of DCM) was added dropwise at 0 °C to the reaction mixture while stirring, the mixture was allowed to reach room temperature and stirring was continued for overnight. After complete consumption of the *ortho*-bromoaniline derivative **A2** (as monitored by TLC), reaction mixture was quenched by addition of saturated aq. NH<sub>4</sub>Cl solution and organic layer was extracted with DCM (2 x 10 mL). The accumulated organic layers were dried over anhydrous Na<sub>2</sub>SO<sub>4</sub> and evaporated under reduced pressure. The crude residue was purified by silica gel chromatography by using ethyl acetate in hexane as eluent to afford the desired products **S6** in 70-80% yields.

**Step IV:** In a 50 mL two necked round bottom flask, *N*-(2-bromophenyl)benzamide derivatives **S6** (1.5 mmol, 1.0 equiv) were taken, and the flask was evacuated and backfilled with argon (repeated twice). After that 10 mL of anhydrous tetrahydrofuran (THF) was added to it under positive argon pressure and the reaction mixture was cool down to 0 °C. Then, NaH (60% dispersion in mineral oil, 120 mg, 5.0 mmol, 2.0 equiv) was added portion wise to the reaction mixture under positive argon pressure while stirring at the same temperature. After complete addition of NaH, the resulting mixture was stirred at room temperature for 30 min. Then, the reaction mixture was cool down to 0 °C and iodomethane (0.2 mL, 3.3 mmol, 2.2 equiv) was added. The reaction mixture was then allowed to reach room temperature and stirring was continued for another 3 h. Upon completion of the reaction (as monitored by TLC), the reaction mixture was quenched with saturated aq. NH<sub>4</sub>Cl solution and extracted with ethyl acetate (3 x 10 mL). The organic layers were dried over anhydrous Na<sub>2</sub>SO<sub>4</sub> and evaporated under reduced pressure. The crude residue was purified by silica gel chromatography by using ethyl acetate in hexane as eluent to afford *ortho*-bromo substituted *N*-aryl benzamide derivatives **4a-4m** in 84-95% yields.

The benzamide derivative **4p** was synthesized according to GP II by using benzylbromide (0.27 mL, 2.25 mmol, 1.5 equiv).<sup>10c</sup>

**Synthesis of Imine Precursors:** Aldehydes and ketones were used as received from commercial sources without further purification. All the imines were synthesised according to the literature procedures.<sup>11</sup>

**Synthesis of Sulfonylated Heteroaromatic and Peptide Derivatives:** All the sulfonylated heteroaromatic derivatives and sulfone protected tryptophan containing peptides were synthesised according to the literature procedures.<sup>12</sup>

**General Procedure for Borylation of Aryl Halides (GP-III):**

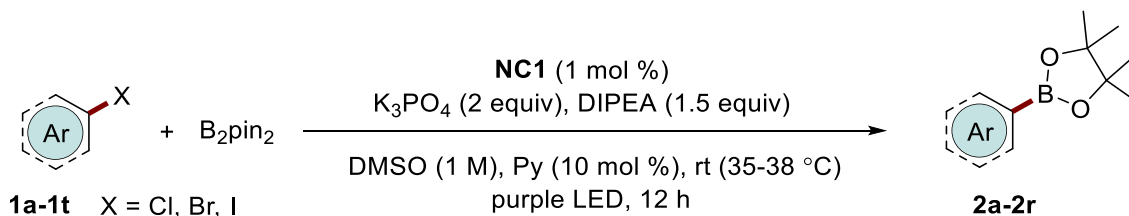

Aryl halide **1** (if solid, 0.5 mmol, 1.0 equiv), photocatalyst **NC1** (1.1 mg, 0.005 mmol, 1 mol%), bis(pinacolato)diboron (B<sub>2</sub>pin<sub>2</sub>, 254 mg, 1.0 mmol, 2.0 equiv), and tripotassium phosphate (K<sub>3</sub>PO<sub>4</sub>, 212 mg, 1.0 mmol, 2.0 equiv) were taken in an oven dried 12 mL glass reaction tube, and it was capped with rubber septum. Then, the reaction vessel was evacuated and backfilled with argon (repeated twice). After that, aryl halide **1** (if liquid, 0.5 mmol, 1.0 equiv), *N,N*-disopropylethylamine (DIPEA, 0.13 mL, 0.75 mmol, 1.5 equiv) and pyridine (5 μL, 10 mol%) were added successively by using Hamilton syringe under positive argon pressure. Anhydrous degassed 0.5 mL DMSO was added to the reaction vessel using syringe. Finally, the tube was placed 4 cm away from Kessil purple light (390 nm) and the reaction mixture was stirred under the irradiation of 390 nm at room temperature (maintaining ~35-38 °C temperature by employing one cooling fan) for 12 h. Upon complete consumption of starting material (as monitored by TLC), the reaction mixture was quenched with saturated aq. NH<sub>4</sub>Cl solution and the organic layer was extracted with ethyl acetate. Then, the organic solvent was evaporated under reduced pressure. The crude residue was purified by column chromatography on silica gel by using ethyl acetate in hexane as eluents to afford borylated products **2a-2r** in 30-90% yields.

**Table S2: Optimization of Borylation Reaction Conditions<sup>a</sup>**

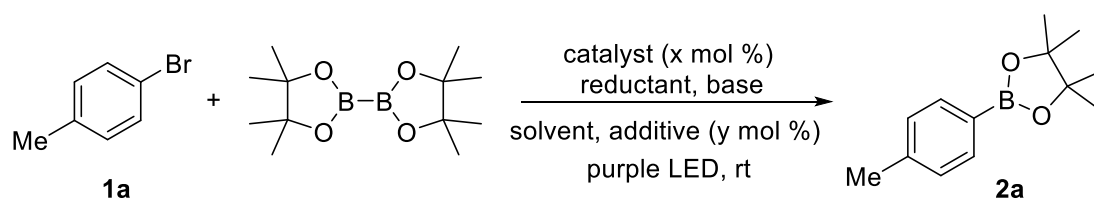

| entry           | catalyst (x mol%) | solvent     | reductant                                     | additive (y mol%) | base                               | time (h)  | yield of 2a [%] <sup>b</sup> |
|-----------------|-------------------|-------------|-----------------------------------------------|-------------------|------------------------------------|-----------|------------------------------|
| 1               | NC1 (3)           | DCM         | Na <sub>2</sub> C <sub>2</sub> O <sub>4</sub> | 4-CN-Py (10)      | K <sub>3</sub> PO <sub>4</sub>     | 48        | nd                           |
| 2               | NC1 (3)           | DMSO        | Na <sub>2</sub> C <sub>2</sub> O <sub>4</sub> | 4-CN-Py (10)      | K <sub>3</sub> PO <sub>4</sub>     | 48        | 63                           |
| 3               | NC1 (3)           | DMF         | Na <sub>2</sub> C <sub>2</sub> O <sub>4</sub> | 4-CN-Py (10)      | K <sub>3</sub> PO <sub>4</sub>     | 48        | 61                           |
| 4               | NC1 (3)           | DMSO        | Hantzsch Ester                                | 4-CN-Py (10)      | K <sub>3</sub> PO <sub>4</sub>     | 48        | nd                           |
| 5               | NC1 (3)           | DMSO        | DIPEA                                         | 4-CN-Py (10)      | K <sub>3</sub> PO <sub>4</sub>     | 48        | 78                           |
| 6               | NC1 (3)           | DMSO        | NEt <sub>3</sub>                              | 4-CN-Py (10)      | K <sub>3</sub> PO <sub>4</sub>     | 48        | 69                           |
| 7               | NC1 (3)           | DMSO        | DIPEA                                         | 4-CN-Py (10)      | K <sub>2</sub> HPO <sub>4</sub>    | 48        | 47                           |
| 8               | NC1 (3)           | DMSO        | DIPEA                                         | 4-CN-Py (10)      | KF                                 | 48        | 63                           |
| 9               | NC1 (3)           | DMSO        | DIPEA                                         | 4-CN-Py (10)      | Cs <sub>2</sub> CO <sub>3</sub>    | 48        | 74                           |
| 10              | NC1 (1)           | DMSO        | DIPEA                                         | Py (10)           | NaOMe                              | 48        | 76                           |
| 11              | NC1 (3)           | DMSO        | DIPEA                                         | Py (10)           | K <sub>3</sub> PO <sub>4</sub>     | 48        | 83                           |
| 12              | NC1 (3)           | DMSO        | DIPEA                                         | –                 | K <sub>3</sub> PO <sub>4</sub>     | 48        | 59                           |
| 13              | NC1 (3)           | DMSO        | DIPEA                                         | Py (100)          | K <sub>3</sub> PO <sub>4</sub>     | 48        | 60                           |
| 14              | NC1 (3)           | DMSO        | DIPEA                                         | 4-CN-Py (100)     | K <sub>3</sub> PO <sub>4</sub>     | 48        | nd                           |
| 15              | NC1 (3)           | DMSO        | DIPEA                                         | Py (10)           | K <sub>3</sub> PO <sub>4</sub>     | 12        | 93                           |
| 16              | NC1 (3)           | DMSO        | DIPEA                                         | Py (10)           | K <sub>3</sub> PO <sub>4</sub>     | 24        | 86                           |
| 17              | NC1 (3)           | DMSO        | DIPEA                                         | Py (10)           | K <sub>3</sub> PO <sub>4</sub>     | 36        | 82                           |
| 18              | NC3 (3)           | DMSO        | DIPEA                                         | Py (10)           | K <sub>3</sub> PO <sub>4</sub>     | 12        | 74                           |
| 19              | NC4 (3)           | DMSO        | DIPEA                                         | Py (10)           | K <sub>3</sub> PO <sub>4</sub>     | 12        | 75                           |
| 20              | NC2 (3)           | DMSO        | DIPEA                                         | Py (10)           | K <sub>3</sub> PO <sub>4</sub>     | 12        | 76                           |
| 21              | NC1 (0.5)         | DMSO        | DIPEA                                         | Py (10)           | K <sub>3</sub> PO <sub>4</sub>     | 12        | 73                           |
| <b>22</b>       | <b>NC1 (1)</b>    | <b>DMSO</b> | <b>DIPEA</b>                                  | <b>Py (10)</b>    | <b>K<sub>3</sub>PO<sub>4</sub></b> | <b>12</b> | <b>88 [72]<sup>c</sup></b>   |
| 23 <sup>d</sup> | NC1 (1)           | DMSO        | DIPEA                                         | Py(10)            | K <sub>3</sub> PO <sub>4</sub>     | 12        | 74                           |



|                 |         |      |       |         |                                |    |    |
|-----------------|---------|------|-------|---------|--------------------------------|----|----|
| 24 <sup>e</sup> | NC1 (1) | DMSO | DIPEA | Py(10)  | K <sub>3</sub> PO <sub>4</sub> | 12 | 69 |
| 25              | NC2 (2) | DMSO | DIPEA | Py (10) | K <sub>3</sub> PO <sub>4</sub> | 12 | 85 |
| 26              | NC1 (1) | DMSO | DIPEA | Py (25) | K <sub>3</sub> PO <sub>4</sub> | 12 | 72 |
| 27              | NC1 (1) | DMSO | DIPEA | Py (50) | K <sub>3</sub> PO <sub>4</sub> | 12 | 56 |
| 28 <sup>f</sup> | NC1(1)  | DMSO | DIPEA | Py (10) | K <sub>3</sub> PO <sub>4</sub> | 12 | 50 |
| 29              | –       | DMSO | DIPEA | Py (10) | K <sub>3</sub> PO <sub>4</sub> | 12 | 4  |
| 30              | NC1 (1) | DMSO | –     | Py (10) | K <sub>3</sub> PO <sub>4</sub> | 12 | 57 |
| 31              | NC1(1)  | DMSO | DIPEA | Py (10) | –                              | 12 | 29 |
| 32 <sup>g</sup> | NC1(1)  | DMSO | DIPEA | Py (10) | K <sub>3</sub> PO <sub>4</sub> | 12 | 51 |
| 33 <sup>h</sup> | NC1 (1) | DMSO | DIPEA | Py (10) | K <sub>3</sub> PO <sub>4</sub> | 12 | nd |

<sup>a</sup>Reaction conditions: **1a** (0.3 mmol), B<sub>2</sub>Pin<sub>2</sub> (0.6 mmol), reductant (1.5 equiv), base (2.0 equiv), solvent (0.3 mL, 1 M), nd = not detected. <sup>b</sup>NMR yields by taking mesitylene as internal standard. <sup>c</sup>Isolated yields. <sup>d</sup>Using 1 equiv of DIPEA. <sup>e</sup>Using 2 equiv of DIPEA. <sup>f</sup>1 Equiv of B<sub>2</sub>Pin<sub>2</sub> and 1 equiv of K<sub>3</sub>PO<sub>4</sub> has been used. <sup>g</sup>Under air. <sup>h</sup>Without degassing the solvent.

#### General Procedure for the Phosphorylation of Aryl Halides (GP-IV):

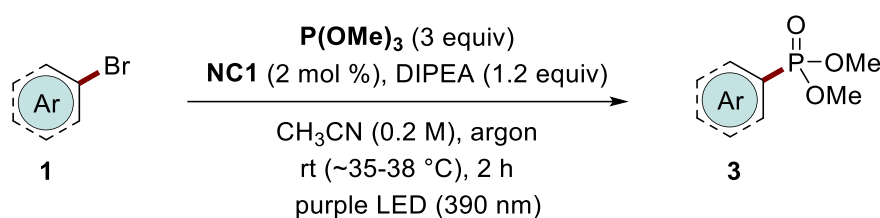

Aryl bromide **1** (if solid, 0.2 mmol, 1.0 equiv) and photocatalyst **NC1** (1.7 mg, 0.004 mmol, 2 mol%) were taken in an oven dried 12 mL glass reaction tube and it was capped with a rubber septum. Then the reaction vessel was evacuated and backfilled with argon (repeated twice). After that, aryl bromide **1** (if liquid, 0.2 mmol, 1.0 equiv) and trimethylphosphite (70  $\mu$ L, 0.6 mmol, 3 equiv) were successively added using Hamilton syringe under positive argon pressure. Then 1 mL anhydrous degassed acetonitrile followed by *N,N*-diisopropylethylamine (42  $\mu$ L, 0.24 mmol, 1.2 equiv) were successively added by Hamilton syringe. Finally, the tube was placed 4 cm away from Kessil purple LED light (390 nm), and stirred vigorously under the irradiation of 390 nm purple LED light at room temperature (maintaining ~35-38  $^\circ$ C temperature by employing one cooling fan). Upon complete consumption of bromide (as monitored by TLC), the reaction mixture was diluted with ethyl acetate, the crude reaction mixture was transferred to a round bottom flask and organic solvent was evaporated under

reduced pressure. The crude residue was purified by silica gel column chromatography by using ethyl

acetate in hexane as eluent to afford the desired phosphonate products **3a-3f** in 49-90% yields.

**General Procedure for the Reductive C-C Coupling of *ortho*-Bromo Substituted *N*-Phenyl Benzamide (GP-V):**

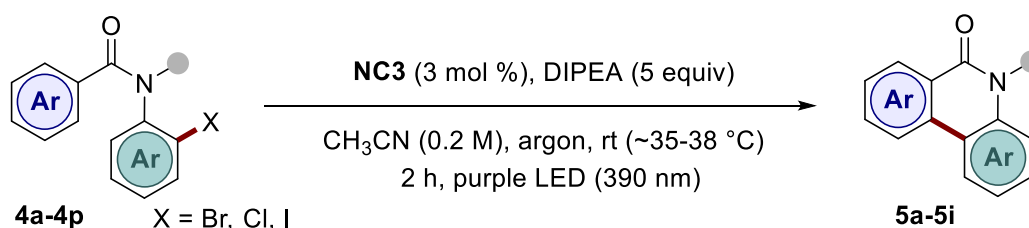

The halogen substituted *N*-methylbenzamide **4** (0.5 mmol, 1.0 equiv) and photocatalyst **NC3** (0.015 mmol, 3 mol%) were taken in an oven dried 12 mL glass reaction tube and it was capped with a rubber septum. Then the reaction vessel was evacuated and backfilled with argon (repeated twice). After that, 2.5 mL of anhydrous degassed acetonitrile and *N,N*-diisopropylethylamine (0.43 mL, 2.5 mmol, 5.0 equiv) were successively added using syringe. Finally, the tube was placed 4 cm away from purple LED light (390 nm), and stirred vigorously under the irradiation of 390 nm purple LED light at room temperature (maintaining ~35-38 °C temperature by employing one cooling fan). Upon complete consumption of starting material (as monitored by TLC), the reaction mixture was diluted with ethyl acetate, the crude reaction mixture was transferred to a round bottom flask and organic solvent was evaporated under reduced pressure. The crude residue was purified by silica gel column chromatography by using ethyl acetate in hexane as eluent to afford the desired phenanthridine products **5a-5i** in 55-89% yields.

**Table S3: Optimization of the C-C coupling Reaction Conditions:<sup>a</sup>**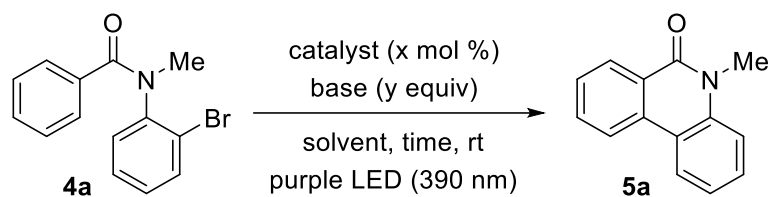

| entry | catalyst (x mol%) | base (y equiv)       | solvent                 | time     | yield (%) <sup>b</sup> |
|-------|-------------------|----------------------|-------------------------|----------|------------------------|
| 1     | NC1 (2)           | NBu <sub>3</sub> (5) | CH <sub>3</sub> CN      | 24       | 20                     |
| 2     | NC1 (2)           | DIPEA (1)            | CH <sub>3</sub> CN      | 2        | 53                     |
| 3     | NC1 (2)           | DIPEA (1)            | CH <sub>3</sub> CN      | 10       | 30                     |
| 4     | NC1 (2)           | –                    | CH <sub>3</sub> CN      | 10       | 0                      |
| 5     | –                 | DIPEA (1)            | CH <sub>3</sub> CN      | 10       | 0                      |
| 6     | NC1 (2)           | DIPEA (0.5)          | CH <sub>3</sub> CN      | 12       | <5                     |
| 7     | NC1 (2)           | DIPEA (0.25)         | CH <sub>3</sub> CN      | 12       | <5                     |
| 8     | NC1 (2)           | DIPEA (9)            | CH <sub>3</sub> CN      | 2        | 55                     |
| 9     | NC1 (2)           | DIPEA (2)            | CH <sub>3</sub> CN      | 2        | 66                     |
| 10    | NC1 (2)           | DIPEA (5)            | CH <sub>3</sub> CN      | 2        | 69                     |
| 11    | NC1 (2)           | NEt <sub>3</sub> (5) | CH <sub>3</sub> CN      | 2        | 0                      |
| 12    | NC3 (2)           | DIPEA (5)            | CH <sub>3</sub> CN      | 2        | 74                     |
| 13    | NC2 (2)           | DIPEA (5)            | CH <sub>3</sub> CN      | 2        | 56                     |
| 14    | NC4 (2)           | DIPEA (5)            | CH <sub>3</sub> CN      | 2        | 71                     |
| 15    | NC5 (2)           | DIPEA (5)            | CH <sub>3</sub> CN      | 2        | 45                     |
| 16    | NC6(2)            | DIPEA (5)            | CH <sub>3</sub> CN      | 2        | 73                     |
| 17    | NC3 (2)           | NEt <sub>3</sub> (5) | CH <sub>3</sub> CN      | 2        | 0                      |
| 18    | NC3 (2)           | DIPEA (5)            | DMF                     | 2        | 70                     |
| 19    | NC3 (2)           | DIPEA (2)            | DMF                     | 2        | 49                     |
| 20    | NC3 (2)           | DIPEA (2)            | CH <sub>3</sub> CN      | 2        | 71                     |
| 21    | <b>NC3 (3)</b>    | <b>DIPEA (5)</b>     | <b>CH<sub>3</sub>CN</b> | <b>2</b> | <b>91</b>              |
| 22    | NC3 (1)           | DIPEA (5)            | CH <sub>3</sub> CN      | 2        | 77                     |

<sup>a</sup>Reaction conditions: **4a** (0.2 mmol), anhydrous degassed solvent (1 mL, 0.2 M). <sup>b</sup>NMR yield by taking mesitylene as internal standard.

### General Procedure for the Reductive Dimerization of Aldehydes and Ketones (GP-VI):

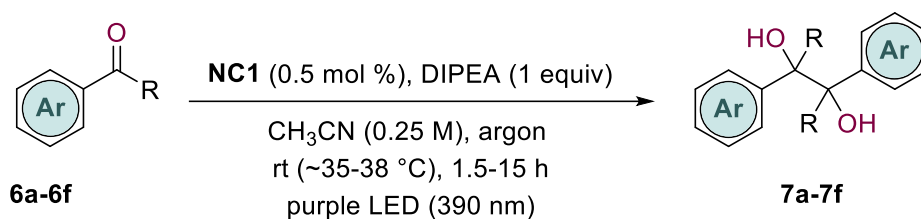

Aldehyde or ketone **6** (if solid, 0.5 mmol, 1.0 equiv) and photocatalyst **NC1** (1.1 mg, 0.0025 mmol, 0.5 mol%) were taken in a 12 mL oven dried glass reaction tube and it was capped with a rubber septum. Then the reaction vessel was evacuated and backfilled with argon (repeated twice). After that, aldehyde or ketone (if liquid, 0.5 mmol, 1.0 equiv) and *N,N*-diisopropylethylamine (87  $\mu\text{L}$ , 0.5 mmol, 1.0 equiv) were successively added using Hamilton syringe under positive argon pressure. Then 2 mL degassed anhydrous acetonitrile was added via syringe. Finally, the tube was placed 4 cm away from Kessil purple LED light (390 nm), and stirred vigorously under the irradiation of 390 nm purple LED light at room temperature (maintaining ~35-38 °C temperature by employing one cooling fan). Upon complete consumption of aldehyde or ketone (as monitored by TLC), the reaction mixture was diluted with ethyl acetate, the crude reaction mixture was transferred to a round bottom flask and organic solvent was evaporated under reduced pressure. The crude residue was purified by silica gel column chromatography by using ethyl acetate in hexane as eluent to afford the desired pinacol products **7a-7i** in 63-99% yields. The *meso:dl* diastereoisomeric ratio of the various products were evaluated by  $^1\text{H}$  NMR analysis of the hydroxyl and benzylic proton (for aldehydes)/ methyl proton (for ketones) and comparing their chemical shift values with the reported data.

### General Procedure for the Reductive Dimerization of Imines (GP-VII):

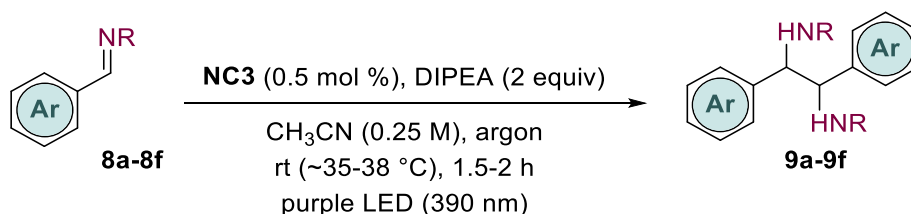

Imine **8** (0.5 mmol, 1.0 equiv) and photocatalyst **NC3** (1.2 mg, 0.0025 mmol, 0.5 mol%) were taken in an oven dried 12 mL glass reaction tube and it was capped with a rubber septum. Then the reaction vessel was evacuated and backfilled with argon (repeated twice). After that, 2 mL degassed anhydrous acetonitrile and *N,N*-diisopropylethylamine (0.180  $\mu\text{L}$ , 1.0 mmol, 2.0

equiv) were successively added via syringe under positive argon pressure. Finally, the tube was placed 4 cm away from Kessil purple LED light (40 W), and stirred vigorously under the irradiation of 390 nm purple LED light at room temperature (maintaining ~35-38 °C temperature by employing one cooling fan). Upon complete consumption of imine (as monitored by TLC), the crude reaction mixture was diluted with ethyl acetate, the crude mixture was transferred to a round bottom flask and organic solvent was evaporated under reduced pressure. The crude residue was purified by column chromatography on neutral activated alumina to afford the desired imino-pinacol products **9a-9f** in 52-96% yield. The *meso:dl* diastereoisomeric ratios of the various products were evaluated by <sup>1</sup>H NMR analysis of the benzylic proton and comparing their chemical shift values with the reported data.

**Table S4: Optimization of the Piancol Coupling Reaction Conditions:<sup>a</sup>**

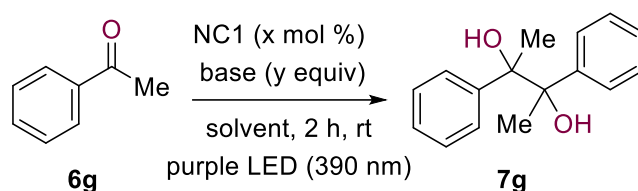

| entry           | catalyst (x mol%) | base (y equiv)       | solvent                 | yield (%) <sup>d</sup> |
|-----------------|-------------------|----------------------|-------------------------|------------------------|
| 1               | NC1 (1)           | DIPEA (1)            | CH <sub>3</sub> CN      | 77                     |
| <b>2</b>        | <b>NC1 (0.5)</b>  | <b>DIPEA (1)</b>     | <b>CH<sub>3</sub>CN</b> | <b>76</b>              |
| 3               | NC1 (0.5)         | NEt <sub>3</sub> (1) | CH <sub>3</sub> CN      | 30                     |
| 4               | NC1 (0.5)         | Hantzsch ester (1)   | CH <sub>3</sub> CN      | 30                     |
| 5               | NC1 (0.5)         | DIPA (1)             | CH <sub>3</sub> CN      | 0                      |
| 6               | NC1 (0.5)         | DABCO (1)            | CH <sub>3</sub> CN      | 0                      |
| 7               | NC1 (0.5)         | DIPEA (1)            | DCM                     | 30                     |
| 8               | NC1 (0.5)         | DIPEA (1)            | DMF                     | 41                     |
| 9               | NC1 (0.5)         | DIPEA (1)            | DMSO                    | 38                     |
| 10              | -                 | DIPEA (1)            | CH <sub>3</sub> CN      | 0                      |
| 11              | NC1 (0.5)         | -                    | CH <sub>3</sub> CN      | 0                      |
| 12 <sup>b</sup> | NC1 (0.5)         | DIPEA (1)            | CH <sub>3</sub> CN      | 0                      |
| 13 <sup>c</sup> | NC1 (0.5)         | DIPEA (1)            | CH <sub>3</sub> CN      | 0                      |

<sup>a</sup>Reaction conditions: ketone **6g** (0.5 mmol), anhydrous degassed solvent (2.0 mL, 0.25 M).

<sup>b</sup>Under air. <sup>c</sup>Without degassing the solvent. <sup>d</sup>Isolated yields.

**Table S5: Catalyst Screening for Pinacol and Imino-Pinacol Reaction:**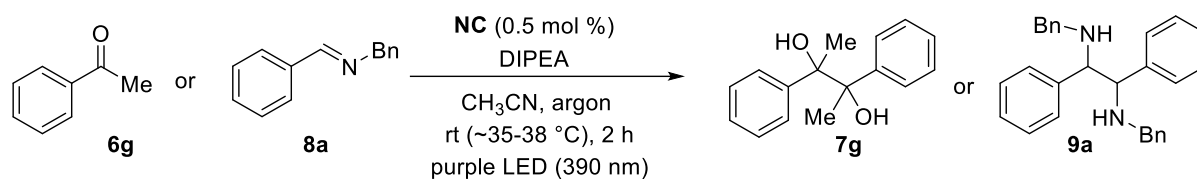

| catalyst                    | NC1    | NC2    | NC3    | NC4    | NC5    | NC6    |
|-----------------------------|--------|--------|--------|--------|--------|--------|
| <i>meso:dl</i> <sup>a</sup> | 1:1.11 | 1:1.17 | 1:1.18 | 1:1.15 | 1:1.11 | 1:1.35 |
| yield <sup>a</sup>          | 76%    | 61%    | 71%    | 62%    | 67%    | 65     |
| <i>meso:dl</i> <sup>b</sup> | 1:1.76 | 1:2.08 | 1:1.82 | 1:3.03 | 1:1.91 | 1:1.70 |
| yield <sup>b</sup>          | 68%    | 73%    | 89%    | 66%    | 82     | 63%    |

Reaction conditions: *Pinacol reaction*:<sup>a</sup> Ketone **6g** (0.5 mmol), NC catalyst (0.0025 mmol, 0.5 mol%), DIPEA (0.5 mmol, 1.0 equiv), anhydrous degassed CH<sub>3</sub>CN (2.0 mL, 0.25 M). *Imino-pinacol reaction*:<sup>b</sup> Imine **8a** (0.5 mmol), NC catalyst (0.0025 mmol, 0.5 mol%), DIPEA (1.0 mmol, 2.0 equiv), anhydrous degassed CH<sub>3</sub>CN (2.0 mL, 0.25 M).

### General Procedure for the Reductive Desulfonation of *N*-Sulfonyl Heteroaromatic Compounds (GP-VIII):

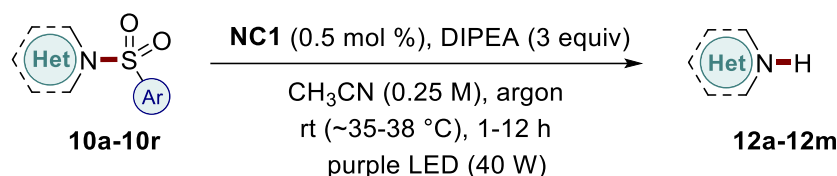

The *N*-sulfonyl heteroaromatic compound **10** (0.5 mmol, 1.0 equiv) and photocatalyst **NC1** (1.1 mg, 0.0025 mmol, 0.5 mol%) were taken in an oven dried 10 mL glass reaction tube and it was capped with a rubber septum. Then the reaction vessel was evacuated and backfilled with argon (repeated twice). After that, 2 mL of degassed anhydrous acetonitrile and *N,N*-diisopropylethylamine (0.26 mL, 1.5 mmol, 3.0 equiv) were successively added via syringe under positive argon pressure. Finally, the tube was placed 4 cm away from Kessil purple LED light and stirred vigorously under the irradiation of 390 nm purple LED light at room temperature (maintaining ~35-38 °C temperature by employing one cooling fan). Upon complete consumption of starting material (as monitored by TLC), the crude reaction mixture was diluted with ethyl acetate, the crude mixture was transferred to a round bottom flask and organic solvent was evaporated under reduced pressure. The crude residue was purified by

column chromatography on silica gel by using ethyl acetate in hexane to afford desulfonylated heteroaromatics **12a-12m** in 75-97% yields.

**Table S6: Optimization of the Desulfonylation Reaction Conditions:<sup>a</sup>**

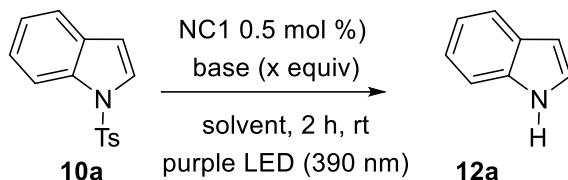

| entry           | base (x equiv)       | solvent                 | yield (%) <sup>b</sup> |
|-----------------|----------------------|-------------------------|------------------------|
| 1               | DIPEA (1)            | CH <sub>3</sub> CN      | 72                     |
| <b>2</b>        | <b>DIPEA (3)</b>     | <b>CH<sub>3</sub>CN</b> | <b>90</b>              |
| 3               | NEt <sub>3</sub> (3) | CH <sub>3</sub> CN      | 30                     |
| 4               | Hantzsch ester (3)   | CH <sub>3</sub> CN      | 32                     |
| 5               | DIPA (3)             | CH <sub>3</sub> CN      | 0                      |
| 6               | DABCO (3)            | CH <sub>3</sub> CN      | 0                      |
| 7               | DIPEA (3)            | DCM                     | 25                     |
| 8               | DIPEA (3)            | DMF                     | 40                     |
| 9               | DIPEA (3)            | DMSO                    | 45                     |
| 10              | -                    | CH <sub>3</sub> CN      | 0                      |
| 11 <sup>c</sup> | DIPEA (3)            | CH <sub>3</sub> CN      | 0                      |
| 12 <sup>d</sup> | DIPEA (3)            | CH <sub>3</sub> CN      | 0                      |
| 13 <sup>e</sup> | DIPEA (3)            | CH <sub>3</sub> CN      | 0                      |

<sup>a</sup>Reaction conditions: **10a** (0.5 mmol), NC1 (0.0025 mmol), and anhydrous degassed solvent (2.0 mL, 0.1 M). <sup>b</sup>Isolated yields. <sup>c</sup>Under air. <sup>d</sup>Without degassing the solvent. <sup>e</sup>In the absence of NC1.

## General Procedure for the Reductive Desulfonylation of *N*-Sulfonylated Peptides (GP-IX):

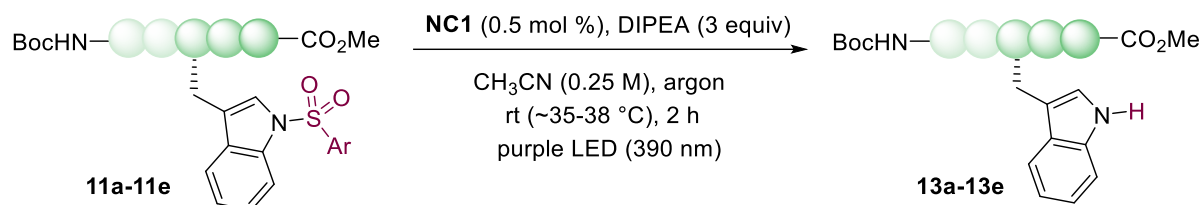

The sulfonyl protected tryptophan containing peptide **11** (0.1 mmol, 1.0 equiv) and photocatalyst **NC1** (0.2 mg, 0.0005 mmol, 0.5 mol%) were taken in an oven dried 12 mL glass reaction tube and it was capped with a rubber septum. Then the reaction vessel was evacuated and backfilled with argon (repeated twice). After that, degassed anhydrous acetonitrile (1.5 mL) and *N,N*-diisopropylethylamine (52  $\mu$ L, 0.3 mmol, 3.0 equiv) were successively added via syringe under positive argon pressure. Finally, the tube was placed 4 cm away from Kessil purple LED light, and stirred vigorously under the irradiation of 390 nm purple LED light at room temperature (maintaining ~35-38 °C temperature by employing one cooling fan). Upon complete consumption of starting material (as monitored by TLC), the crude reaction mixture was diluted with ethyl acetate, the crude mixture was transferred to a round bottom flask and organic solvent was evaporated under reduced pressure. The crude residue was purified by column chromatography on silica gel by using methanol in dichloromethane to afford desulfonylated peptide products **13a-13e** in 89-91% yields.

## Gram-Scale Synthesis and Catalyst Recovery Experiment for Borylation Reaction:

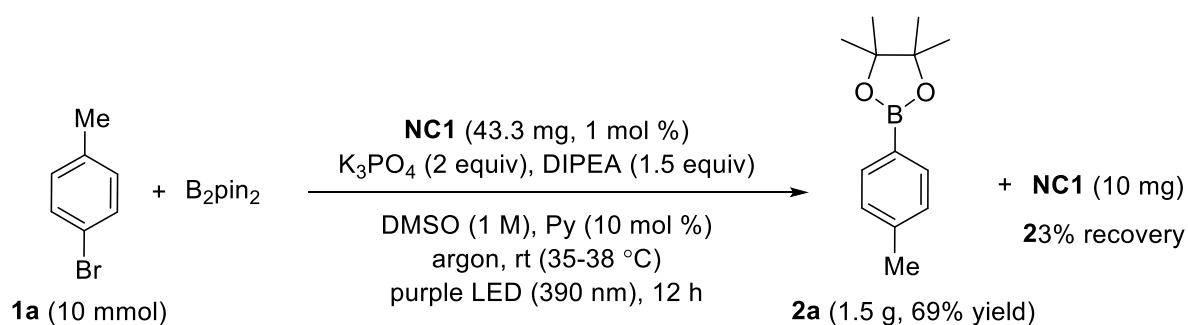

Photocatalyst **NC1** (43.3 mg, 0.1 mmol, 1 mol%), bis(pinacolato)diboron (**B<sub>2</sub>pin<sub>2</sub>**, 5.3 g, 20.0 mmol, 2.0 equiv), and tripotassium phosphate (**K<sub>3</sub>PO<sub>4</sub>**, 4.2 g, 20.0 mmol, 2.0 equiv) were taken in an oven dried 25 mL round bottom flask, and it was capped with rubber septum. Then, the reaction vessel was evacuated and backfilled with argon (repeated twice). After that, 1-bromo-4-methylbenzene **1a** (1.23 mL, 10.0 mmol, 1.0 equiv) and *N,N*-diisopropylethylamine (DIPEA, 2.61 mL, 15.0 mmol, 1.5 equiv) and pyridine (0.1 mL, 10 mol%) were added successively by



Hamilton syringe under positive argon pressure. Anhydrous degassed 10 mL DMSO was added to the reaction vessel using syringe. Finally, the tube was placed 4 cm away from Kessil purple light (390 nm) and the reaction mixture was stirred under the irradiation of 390 nm at room temperature (maintaining ~35-38 °C temperature by employing one cooling fan) for 12 h. Upon complete consumption of starting material (as monitored by TLC), the reaction mixture was quenched with saturated aq. NH<sub>4</sub>Cl solution and the organic layer was extracted with ethyl acetate. Then, the organic solvent was evaporated under reduced pressure. The crude residue was isolated after column chromatography on silica gel using 1% ethyl acetate/hexane as eluent to afford the borylated product **2a** (white solid, 1.5 g, 69% yield). In a second fractions, the catalyst NC1 was recovered by further eluting the column by using 2% ethyl acetate in hexane as eluent (light yellow solid, 10 mg, 23% recovered).

#### Gram-Scale Synthesis and Catalyst Recovery Experiment for C-C Coupling Reaction:

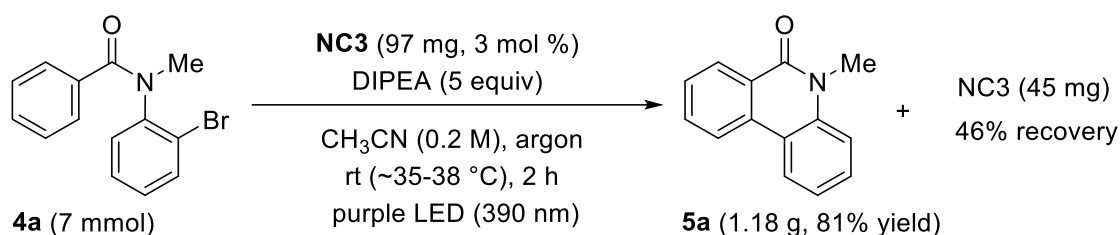

*N*-(2-Bromophenyl)-*N*-methylbenzamide **4a** (2 g, 7.0 mmol, 1.0 equiv) and photocatalyst **NC3** (97.3 mg, 0.21 mmol, 3 mol%) were taken in an oven dried 50 mL round bottom flask and it was capped with a rubber septum. Then the reaction vessel was evacuated and backfilled with argon (repeated twice). After that, degassed anhydrous acetonitrile (35 mL) and *N,N*-diisopropylethylamine (6.1 mL, 35 mmol, 5.0 equiv) were successively added using syringe under positive argon pressure. Finally, the tube was placed 4 cm away from purple LED light (390 nm), and stirred vigorously under the irradiation of 390 nm purple LED light at room temperature (maintaining ~35-38 °C temperature by employing one cooling fan). Upon complete consumption of starting material (as monitored by TLC), the reaction mixture was diluted with ethyl acetate, organic solvent was evaporated under reduced pressure. The catalyst **NC3** was recovered after column chromatography on silica gel using 2% ethyl acetate in hexane as eluent (light yellow solid, 45 mg, 46% recovered). In another fractions the desired product **5a** was also isolated by further eluting the column using 10% ethyl acetate in hexane as eluent (white solid, 1.18 g, 81% yield).

### Gram-Scale Synthesis and Catalyst Recovery Experiment for Pinacol Coupling Reaction:

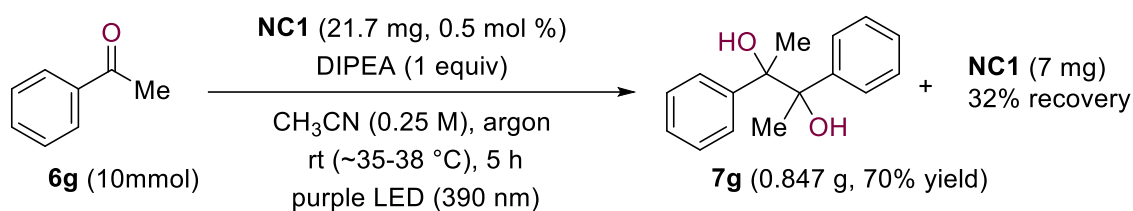

Photocatalyst **NC1** (21.65 mg, 0.05 mmol, 0.5 mol%) was taken in a 50 mL round bottom flask and it was capped with a rubber septum. Then the reaction vessel was evacuated and backfilled with argon (repeated twice). After that, ketone (1.16 mL, 10 mmol, 1.0 equiv) and *N,N*-diisopropylethylamine (1.74 mL, 10 mmol, 1.0 equiv) were successively added using syringe under positive argon pressure. Then 25 mL degassed anhydrous acetonitrile was added by syringe. Finally, the tube was placed 4 cm away from Kessil purple LED light (40 W), and stirred vigorously under the irradiation of 390 nm purple LED light at room temperature (maintaining ~35-38 °C temperature by employing one cooling fan). Upon complete consumption of aldehyde or ketone (as monitored by TLC), the reaction mixture was diluted with ethyl acetate and organic solvent was evaporated under reduced pressure. The catalyst **NC1** was recovered after column chromatography on silica gel using 2% ethyl acetate in hexane as eluent (light yellow solid, 7 mg, 32% recovered). In a second fractions, the desired product **7g** was isolated as white solid by further eluting the column using 10% ethyl acetate in hexane as eluent (0.847 g, 70% yield).

### Gram-Scale Synthesis and Catalyst Recovery Experiment for Imino-pinacol Coupling Reaction:

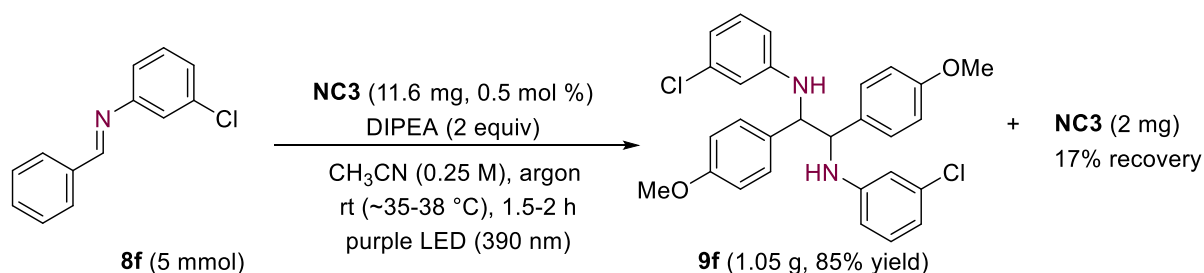

Imine **8f** (1.23 g, 5.0 mmol, 1.0 equiv) and photocatalyst **NC3** (11.6 mg, 0.025 mmol, 0.5 mol%) were taken in a 12 mL oven dried glass reaction tube and it was capped with a rubber septum. Then the reaction vessel was evacuated and backfilled with argon (repeated twice). Then 13 mL degassed anhydrous acetonitrile and *N,N*-diisopropylethylamine (1.74 mL, 10.0 mmol, 2.0 equiv) were added by syringe under positive argon pressure. Finally, the tube was placed 4 cm away from Kessil purple LED light, and stirred vigorously under the irradiation

of 390 nm purple LED light at room temperature (maintaining ~35-38 °C temperature by employing one cooling fan). Upon complete consumption of aldehyde or ketone (as monitored by TLC), the reaction mixture was diluted with ethyl acetate and organic solvent was evaporated under reduced pressure. The catalyst NC3 was recovered after column chromatography on silica gel using 2% ethyl acetate in hexane as eluent (light yellow solid, 3 mg, 17% recovered). In a second fractions, the desired product **9f** was isolated as white solid by further eluting the column using 10% ethyl acetate in hexane as eluent (1.05 g, 85% yield).

### Gram-Scale Synthesis and Catalyst Recovery Experiment for Desulfonylation Reaction:

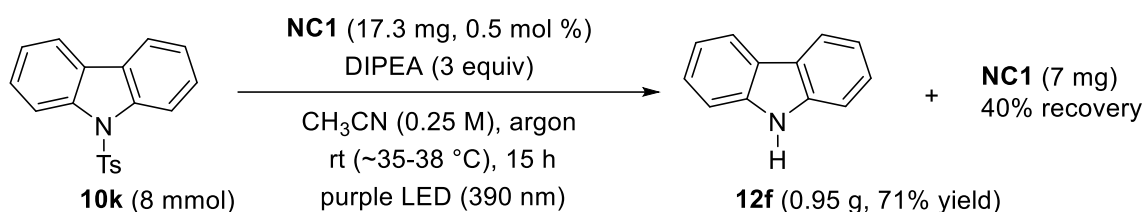

**10k** (2.6 g, 8.0 mmol, 1.0 equiv) and photocatalyst **NC1** (17.3 mg, 0.04 mmol, 0.5 mol%) were taken in an oven dried 50 mL round bottom flask and it was capped with a rubber septum. Then the reaction vessel was evacuated and backfilled with argon (repeated twice). After that, 32 mL degassed anhydrous acetonitrile and *N, N*-diisopropylethylamine (4.18 mL, 24.0 mmol, 3.0 equiv) were successively added using syringe under positive argon pressure. Finally, the tube was placed 4 cm away from Kessil purple LED light and stirred vigorously under the irradiation of 390 nm purple LED light at room temperature (maintaining ~35-38 °C temperature by employing one cooling fan). Upon complete consumption of starting material (as monitored by TLC), the crude reaction mixture was diluted with ethyl acetate and organic solvent was evaporated under reduced pressure. The catalyst **NC1** was recovered after column chromatography on silica gel using 2% ethyl acetate in hexane as eluent (light yellow solid, 7 mg, 40% recovered). In a second fractions, the desired product **12f** was isolated as white solid by further eluting the column using 10% ethyl acetate in hexane as eluent (0.95 g, 71% yield).

### **13-Methyl-7,8-diphenyl-13H-naphtho[2,1-a]carbazole (NC1):**<sup>6b</sup> The titled compound **NC1**

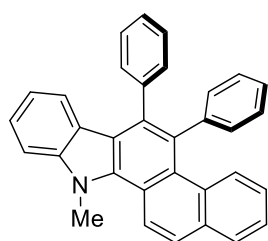

was synthesized according to the **GP-I**. The product **NC1** was isolated after column chromatography using 2% ethyl acetate in hexane as eluent (light yellow solid, 1.95 g, 90% yield). <sup>1</sup>H NMR (400 MHz, CDCl<sub>3</sub>): δ (ppm) 8.72 (d, *J* = 9.1 Hz, 1H), 7.88 (t, *J* = 7.5 Hz, 2H), 7.73 (d, *J* = 8.7 Hz, 1H), 7.53 (d, *J* = 8.2 Hz, 1H), 7.47 – 7.41 (m, 2H), 7.35 – 7.32 (m,

3H), 7.24 – 7.15 (m, 7H), 7.07 (t,  $J = 7.8$  Hz, 1H), 6.98 (t,  $J = 7.5$  Hz, 1H), 6.63 (d,  $J = 7.9$  Hz, 1H), 4.42 (s, 3H).

**8-(3-Methoxyphenyl)-13-methyl-7-phenyl-13H-naphtho[2,1-a]carbazole (NC2):** The titled compound **NC2** was synthesized according to the **GP-I**. The product

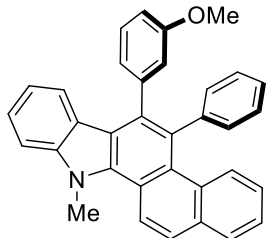

**NC2** was isolated after column chromatography using 2% ethyl acetate in hexane as eluent (light yellow solid, 2.1 g, 92% yield, mixture of two isomers).  $^1\text{H NMR}$  (500 MHz,  $\text{CDCl}_3$ ):  $\delta$  (ppm) 8.73 (d,  $J = 9.1$  Hz, 2H), 7.88 (d,  $J = 8.4$  Hz, 5H), 7.80 (d,  $J = 8.4$  Hz, 1H), 7.71 (d,  $J = 8.8$  Hz, 1H), 7.54 (d,  $J = 8.2$  Hz, 2H), 7.47 – 7.39 (m, 5H), 7.37 – 7.31 (m,

5H), 7.23 – 7.13 (m, 7H), 7.11 – 7.03 (m, 3H), 7.01 – 6.94 (m, 2H), 6.88 – 6.85 (m, 2H), 6.74 (d,  $J = 7.8$  Hz, 6H), 6.61 (d,  $J = 7.6$  Hz, 1H), 4.45 (s, 7H), 3.68 (s, 3H), 3.63 (s, 4H).  $^{13}\text{C}$   $\{^1\text{H}\}$  **NMR** (126 MHz,  $\text{CDCl}_3$ ):  $\delta$  (ppm) 159.5, 159.3, 144.6, 143.3, 142.8, 142.1, 140.8, 136.8, 136.7, 136.6, 132.84, 132.76, 131.8, 131.73, 131.69, 131.20, 131.0, 130.5, 130.3, 129.2, 129.0, 128.7, 128.6, 128.3, 128.18, 128.12, 128.1, 128.0, 127.9, 126.8, 126.3, 126.2, 125.63, 125.57, 125.4, 125.3, 124.8, 124.7, 124.6, 123.2, 123.1, 123.0, 122.5, 122.3, 121.3, 121.2, 120.22, 120.18, 119.69, 119.66, 119.6, 117.0, 115.6, 113.0, 112.5, 109.1, 55.4, 35.4. **FTIR:** (neat)/  $\text{cm}^{-1} = 3052, 2935, 2832, 1597, 1575, 1464, 1425, 1385, 1322, 1244, 1167, 1025$ . **HRMS (ESI)**  $m/z$ :  $[\text{M}+\text{H}]^+$  calcd for  $\text{C}_{34}\text{H}_{26}\text{NO}$ , 464.2009; found 464.2021.

**8-(4-Methoxyphenyl)-13-methyl-7-phenyl-13H-naphtho[2,1-a]carbazole (NC3):**<sup>6b</sup> The titled

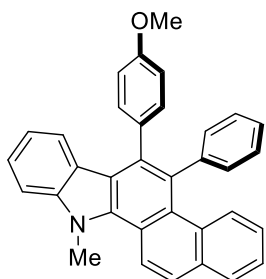

compound **NC3** was synthesized according to the **GP-I**. The product **NC3** was isolated after column chromatography using 2% ethyl acetate in hexane as eluent (light yellow solid, 1.97 g, 85% yield, mixture of two isomers).  $^1\text{H NMR}$  (400 MHz,  $\text{CDCl}_3$ ):  $\delta$  (ppm) 8.72 (d,  $J = 9.1$  Hz, 2H), 7.87 – 7.85 (m, 4H), 7.75 (d,  $J = 8.8$  Hz, 1H), 7.67 (d,  $J = 8.8$  Hz, 1H), 7.53 (d,  $J = 8.2$  Hz, 2H), 7.45 – 7.38 (m, 4H), 7.35 – 7.31 (m, 3H),

7.23 – 7.17 (m, 5H), 7.14 – 7.07 (m, 5H), 7.06 – 7.00 (m, 3H), 7.00 – 6.96 (m, 1H), 6.93 (d,  $J = 7.2$  Hz, 1H), 6.87 – 6.84 (m, 2H), 6.75 – 6.73 (m, 2H), 6.70 (d,  $J = 8.0$  Hz, 1H), 6.57 (d,  $J = 8.0$  Hz, 1H), 4.44 (s, 6H), 3.85 (s, 3H), 3.79 (s, 3H).

**7-(4-Chlorophenyl)-13-methyl-8-phenyl-13H-naphtho[2,1-a]carbazole (NC4):** The titled

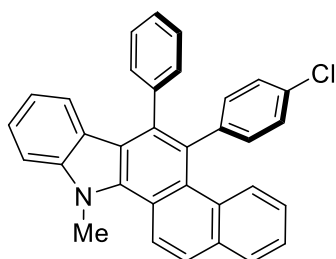

compound **NC4** was synthesized according to the **GP-I**. The

product **NC4** was isolated after column chromatography using 2%

ethyl acetate in hexane as eluent (light yellow solid, 2.1 g, 90 %

yield, mixture of two isomer).  $^1\text{H NMR}$  (500 MHz,  $\text{CDCl}_3$ ):  $\delta$  8.72

(d,  $J = 9.1$  Hz, 3H), 7.90 – 7.87 (m, 5H), 7.69 – 7.66 (m, 3H), 7.56

– 7.53 (m, 3H), 7.47 – 7.39 (m, 6H), 7.35 – 7.32 (m, 5H), 7.30 –

7.28 (m, 2H), 7.22 – 7.13 (m, 12H), 7.12 – 7.03 (m, 8H), 7.02 – 6.98 (m, 1H), 6.95 (t,  $J = 7.5$

Hz, 2H), 6.67 (d,  $J = 8.0$  Hz, 1H), 6.57 (d,  $J = 8.0$  Hz, 2H), 4.451 (s, 3H), 4.447 (s, 5H).  $^{13}\text{C}$

$\{^1\text{H}\}$  NMR (126 MHz,  $\text{CDCl}_3$ ):  $\delta$  (ppm) 143.1, 142.9, 142.8, 142.0, 140.6, 139.4, 137.0, 136.9,

135.4, 133.2, 132.9, 132.7, 132.1, 132.0, 131.8, 131.7, 131.51, 131.48, 130.4, 129.8, 129.1,

128.7, 128.6, 128.4, 128.24, 128.20, 128.18, 128.1, 127.1, 126.43, 126.36, 126.3, 125.68,

125.66, 125.5, 125.4, 124.8, 123.1, 123.0, 122.3, 122.15, 121.22, 121.19, 120.4, 120.3, 119.81,

119.76, 119.7, 119.5, 109.2, 109.1, 35.3, 35.2. **FTIR:** (neat)/  $\text{cm}^{-1} = 3046, 2936, 2832, 2248,$

1597, 1466, 1385, 1323, 1257, 1125, 1085. **HRMS (ESI)  $m/z$ :**  $[\text{M}+\text{H}]^+$  calcd for  $\text{C}_{33}\text{H}_{23}\text{ClN}$ ,

468.1514; found 468.1523.

***N*-(2-Bromophenyl)-*N*,3-dimethylbenzamide (4d):** The titled compound **4d** was synthesised

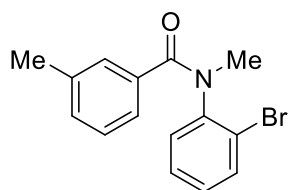

according to **GP-II**. The product **4d** was isolated after column

chromatography using 15% ethyl acetate in hexane as eluent (white

solid, 433 mg, 95% yield).  $^1\text{H NMR}$  (400 MHz,  $\text{CDCl}_3$ ):  $\delta$  (ppm) 7.52

(d,  $J = 7.8$  Hz, 1H), 7.22 (s, 1H), 7.16 – 7.12 (m, 1H), 7.07 – 6.98 (m,

5H), 3.37 (s, 3H), 2.20 (s, 3H).  $^{13}\text{C}$   $\{^1\text{H}\}$  NMR (101 MHz,  $\text{CDCl}_3$ ):  $\delta$  (ppm) 170.8, 143.3,

137.1, 135.3, 133.3, 130.4, 130.3, 128.8, 128.6, 128.2, 127.1, 124.7, 122.3, 36.8, 21.0. **FTIR:**

(neat)/  $\text{cm}^{-1} = 3750, 3671, 2966, 2922, 2865, 1645, 1581, 1474, 1361, 1304, 1158, 1107, 1033.$

**HRMS (ESI)  $m/z$ :**  $[\text{M}+\text{H}]^+$  calcd for  $\text{C}_{15}\text{H}_{15}\text{BrNO}$ , 304.0332; found 304.0322.

***N*-(2-Bromophenyl)-*N*,4-dimethylbenzamide (4e):** The titled compound **4e** was synthesised

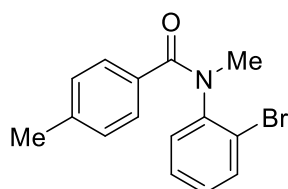

according to **GP-II**. The desired product **4e** was purified by silica gel

column chromatography by using 15% ethyl acetate in hexane as

eluent (yellow solid, 424 mg, 93% yield, rotameric mixture as 28:1).

The characterisation data of the major rotamer is given.  $^1\text{H NMR}$  (500

MHz,  $\text{CDCl}_3$ ):  $\delta$  (ppm) 7.51 (d,  $J = 7.7$  Hz, 1H), 7.23 (d,  $J = 7.5$  Hz, 2H), 7.14 (d,  $J = 7.4$  Hz,

1H), 7.06 (dd,  $J = 12.2, 8.2$  Hz, 2H), 6.92 (d,  $J = 7.1$  Hz, 2H), 3.35 (s, 3H), 2.20 (s, 3H).  $^{13}\text{C}$

$\{^1\text{H}\}$  NMR (126 MHz,  $\text{CDCl}_3$ ):  $\delta$  (ppm) 171.1, 144.0, 140.0, 133.8, 132.8, 130.7, 129.0, 128.5,

128.4, 128.3, 122.8, 37.3, 21.4. **FTIR:** (neat)/  $\text{cm}^{-1}$  = 3058, 2923, 1645, 1477, 1417, 1355, 1306, 1254, 1178, 1110, 1048. **HRMS (ESI)  $m/z$ :**  $[\text{M}+\text{H}]^+$  calcd for  $\text{C}_{15}\text{H}_{15}\text{BrNO}$ , 304.0332; found 304.0321.

***N*-(2-Bromophenyl)-4-methoxy-*N*-methylbenzamide (4f):** The titled compound **4f** was synthesised according to **GP-II**. The product **4f** was isolated after column chromatography using 50% ethyl acetate in hexane as eluent (gummy liquid, 418 mg, 87% yield, rotameric mixture as 15:1). The characterisation data of the major rotamer is given.  **$^1\text{H}$  NMR** (400 MHz,  $\text{CDCl}_3$ ):  $\delta$  (ppm) 7.55 (d,  $J$  = 7.6 Hz, 1H), 7.30 (d,  $J$  = 7.5 Hz, 2H), 7.18 (t,  $J$  = 6.9 Hz, 1H), 7.08 (d,  $J$  = 7.5 Hz, 2H), 6.65 (d,  $J$  = 7.6 Hz, 2H), 3.71 (s, 3H), 3.36 (s, 3H).  **$^{13}\text{C}$   $\{^1\text{H}\}$  NMR** (126 MHz,  $\text{CDCl}_3$ ):  $\delta$  (ppm) 170.8, 160.9, 133.9, 132.3, 130.7, 130.4, 129.0, 128.6, 128.0, 122.9, 113.1, 55.3, 37.5. **FTIR:** (neat)/  $\text{cm}^{-1}$  = 3060, 2933, 2838, 1647, 1608, 1513, 1478, 1419, 1361, 1305, 1253, 1171, 1029. **HRMS (ESI)  $m/z$ :**  $[\text{M}+\text{H}]^+$  calcd for  $\text{C}_{15}\text{H}_{15}\text{BrNO}_2$ , 320.0281; found 320.0291.

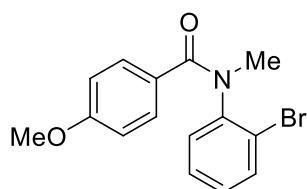

***N*-(2-Bromophenyl)-3,4-dimethoxy-*N*-methylbenzamide (4g):** The titled compound **4g** was

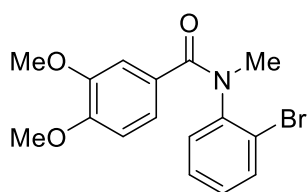

synthesised according to **GP-II**. The product **4g** was isolated after column chromatography using 60% ethyl acetate in hexane as eluent (white solid, 446 mg, 85% yield, rotameric mixture as 16:1).  **$^1\text{H}$  NMR** (400 MHz,  $\text{CDCl}_3$ , major rotamer):  $\delta$  (ppm) 7.55 (d,  $J$  = 7.6 Hz, 1H), 7.17 – 7.14 (m, 1H), 7.05 (t,  $J$  = 6.9 Hz, 2H), 6.96 (d,  $J$  = 7.3 Hz, 1H), 6.88 (s, 1H), 6.62 (d,  $J$  = 7.6 Hz, 1H), 3.77 (s, 3H), 3.66 (s, 3H), 3.34 (s, 3H).  **$^{13}\text{C}$   $\{^1\text{H}\}$  NMR** (101 MHz,  $\text{CDCl}_3$ , rotameric mixture):  $\delta$  (ppm) 170.6, 150.3, 147.8, 144.4, 133.8, 130.6, 129.3, 129.0, 128.7, 127.8, 126.8, 126.4, 122.8, 122.7, 122.1, 111.6, 110.0, 55.8, 55.7, 37.5. **FTIR:** (neat)/  $\text{cm}^{-1}$  = 3058, 2920, 2280, 2168, 2052, 1984, 1635, 1609, 1420, 1255, 1139, 1019. **HRMS (ESI)  $m/z$ :**  $[\text{M}+\text{H}]^+$  calcd for  $\text{C}_{16}\text{H}_{17}\text{BrNO}_3$ , 350.0386; found 350.0392.

***N*-(2-Bromophenyl)-4-fluoro-*N*-methylbenzamide (4h):** The titled compound **4h** was

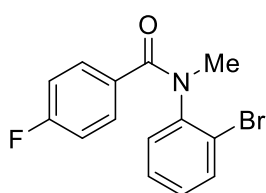

synthesised according to **GP-II**. The product **4h** was isolated after column chromatography using 15% ethyl acetate in hexane as eluent (white solid, 439 mg, 95% yield).  **$^1\text{H}$  NMR** (400 MHz,  $\text{CDCl}_3$ ):  $\delta$  (ppm) 7.53 (d,  $J$  = 7.9 Hz, 1H), 7.35 – 7.32 (m, 2H), 7.18 (t,  $J$  = 7.5 Hz, 1H), 7.12 – 7.05 (m, 2H), 6.82 (t,  $J$  = 8.5 Hz, 2H), 3.36 (s, 3H).  **$^{13}\text{C}$   $\{^1\text{H}\}$  NMR** (101 MHz,  $\text{CDCl}_3$ , rotameric mixture):  $\delta$  (ppm) 170.1, 168.5, 166.0 (d,  $J$  = 254.0 Hz) 163.4 (d,  $J$  = 250.4 Hz),

143.6, 133.9, 132.7 (d,  $J = 9.4$  Hz), 131.8 (d,  $J = 3.3$  Hz), 130.5 (d,  $J = 9.2$  Hz), 129.3, 128.7, 122.7, 115.6 (d,  $J = 22.0$  Hz), 114.9 (d,  $J = 21.8$  Hz), 37.4.  **$^{19}\text{F}$  NMR** (470 MHz,  $\text{CDCl}_3$ , rotameric mixture):  $\delta$  (ppm) -105.5, -109.7. **FTIR**: (neat)/  $\text{cm}^{-1}$  = 3068, 2927, 1652, 1611, 1513, 1479, 1419, 1365, 1307, 1228, 1157, 1112, 1048. **HRMS (ESI)  $m/z$** :  $[\text{M}+\text{H}]^+$  calcd for  $\text{C}_{14}\text{H}_{12}\text{BrFNO}$ , 308.0081; found 308.0081.

***N*-(2-Bromophenyl)-*N*-methyl-3-(trifluoromethyl)benzamide (4i)**: The titled compound **4i**

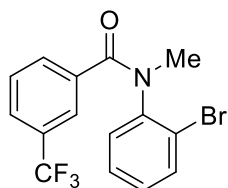

was synthesised according to **GP-II**. The product **4i** was isolated after column chromatography using 20% ethyl acetate in hexane as eluent (yellow liquid, 489 mg, 91% yield, rotameric mixture as 3:1).  **$^1\text{H}$  NMR** (500 MHz,  $\text{CDCl}_3$ , major rotamer):  $\delta$  (ppm) 7.62 (s, 1H), 7.54 (t,  $J = 7.6$  Hz, 2H), 7.47 (d,  $J = 7.7$  Hz, 1H), 7.28 (t,  $J = 7.9$  Hz, 1H), 7.20 (t,  $J = 7.5$  Hz, 1H), 7.13 (d,  $J = 7.5$  Hz, 1H), 7.08 (t,  $J = 7.5$  Hz, 1H), 3.41 (s, 3H).  **$^{13}\text{C}$   $\{^1\text{H}\}$  NMR** (126 MHz,  $\text{CDCl}_3$ , rotameric mixture):  $\delta$  (ppm) 169.6, 168.8, 143.2, 136.5, 134.0, 133.4, 131.5, 131.2, 130.8, 130.6, 130.4, 130.1, 130.0 (q,  $J = 3.6$  Hz), 129.7, 129.3, 128.8, 128.4, 127.2 (q,  $J = 3.8$  Hz), 126.61, 126.58, 125.40, 15.38, 123.8 (q,  $J = 272.3$  Hz), 123.7 (q,  $J = 272.4$  Hz), 122.9, 37.3.  **$^{19}\text{F}$  NMR** (471 MHz,  $\text{CDCl}_3$ , rotameric mixture as 3:1):  $\delta$  (ppm) -102.8, -103.0. **FTIR**: (neat)/  $\text{cm}^{-1}$  = 3069, 2933, 1725, 1654, 1584, 1479, 1371, 1327, 1304, 1167, 1126, 1073. **HRMS (ESI)  $m/z$** :  $[\text{M}+\text{H}]^+$  calcd for  $\text{C}_{15}\text{H}_{12}\text{F}_3\text{NO}$ , 358.0049; found 358.0056.

***N*-(2-Bromo-4-methylphenyl)-*N*-methylbenzamide (4j)**: The titled compound **4j** was

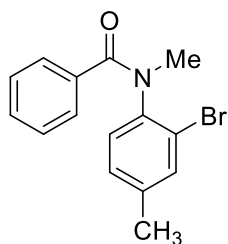

synthesised according to **GP-II**. The product **4j** was isolated after column chromatography using 15% ethyl acetate in hexane as eluent (brown liquid, 419 mg, 92% yield, rotameric mixture as 1:1).  **$^1\text{H}$  NMR** (400 MHz,  $\text{CDCl}_3$ ):  $\delta$  (ppm) 7.35 (d,  $J = 7.6$  Hz, 3H), 7.30 (d,  $J = 7.1$  Hz, 2H), 7.24 – 7.18 (m, 2H), 7.18 – 7.14 (m, 4H), 7.01 (d,  $J = 8.1$  Hz, 2H), 6.97 – 6.90 (m, 4H), 3.47 (s, 3H), 3.36 (s, 3H), 2.26 (s, 3H), 2.24 (s, 3H).  **$^{13}\text{C}$   $\{^1\text{H}\}$  NMR** (101 MHz,  $\text{CDCl}_3$ , rotameric mixture):  $\delta$  (ppm) 171.3, 170.9, 167.9, 142.2, 140.5, 139.5, 136.4, 135.8, 135.7, 134.4, 134.0, 133.0, 132.1, 130.1, 130.0, 129.8, 129.64, 129.55, 129.2, 128.7, 128.10, 128.05, 127.70, 127.66, 126.7, 122.2, 38.6, 37.3, 21.0, 20.7. **FTIR**: (neat)/  $\text{cm}^{-1}$  = 3029, 2924, 1721, 1647, 1576, 1512, 1494, 1362, 1302, 1111, 1048. **HRMS (ESI)  $m/z$** :  $[\text{M}+\text{H}]^+$  calcd for  $\text{C}_{15}\text{H}_{15}\text{BrNO}$ , 304.0332; found 304.0323.

***N*-(2-Bromo-4-methoxyphenyl)-*N*-methylbenzamide (4k):** The titled compound **4k** was

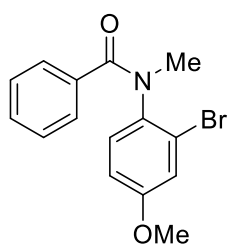

synthesised according to **GP-II**. The product **4k** was isolated after column chromatography using 50% ethyl acetate in hexane as eluent (gummy liquid, 402 mg, 84% yield). **<sup>1</sup>H NMR** (500 MHz, CDCl<sub>3</sub>): δ (ppm) 7.33 (d, *J* = 7.2 Hz, 2H), 7.19 (t, *J* = 7.3 Hz, 1H), 7.13 (t, *J* = 7.4 Hz, 2H), 7.01 (d, *J* = 2.7 Hz, 1H), 6.97 (d, *J* = 8.7 Hz, 1H), 6.65 (dd, *J* = 8.7, 2.7 Hz, 1H),

3.68 (s, 3H), 3.33 (s, 3H). **<sup>13</sup>C {<sup>1</sup>H} NMR** (126 MHz, CDCl<sub>3</sub>): δ (ppm) 171.2, 159.1, 136.5, 136.0, 130.9, 129.6, 128.0, 127.7, 123.2, 118.4, 114.3, 55.7, 37.3. **FTIR:** (neat)/ cm<sup>-1</sup> = 2938, 1645, 1600, 1494, 1364, 1312, 1286, 1228, 1113, 1031. **HRMS (ESI) *m/z*:** [M+H]<sup>+</sup> calcd for C<sub>15</sub>H<sub>15</sub>BrNO<sub>2</sub>, 320.0281; found 320.0274.

***N*-(2-Bromo-4-(trifluoromethyl)phenyl)-*N*-methylbenzamide (4l):** The titled compound **4l**

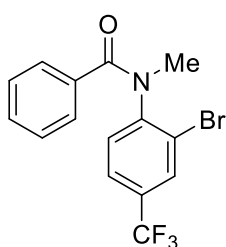

was synthesised according to **GP-II**. The product **4l** was isolated after column chromatography using 20% ethyl acetate in hexane as eluent (yellow gummy liquid, 495 mg, 92% yield). **<sup>1</sup>H NMR** (400 MHz, CDCl<sub>3</sub>): δ (ppm) 7.79 (s, 1H), 7.40 – 7.31 (m, 3H), 7.22 – 7.16 (m, 4H), 3.36 (s, 3H). **<sup>13</sup>C {<sup>1</sup>H} NMR** (101 MHz, CDCl<sub>3</sub>): δ (ppm) 170.8, 147.1, 135.1,

131.1, 131.0 (q, *J* = 3.7 Hz), 130.3, 128.1, 128.0, 125.5, 123.1, 122.7 (q, *J* = 272.3 Hz), 37.02. **<sup>19</sup>F NMR** (471 MHz, CDCl<sub>3</sub>): δ (ppm) -62.7. **FTIR:** (neat)/ cm<sup>-1</sup> = 3066, 2940, 1655, 1605, 1498, 1356, 1320, 1255, 1172, 1078. **HRMS (ESI) *m/z*:** [M+H]<sup>+</sup> calcd for C<sub>15</sub>H<sub>12</sub>F<sub>3</sub>NO, 358.0049; found 358.0043.

***N*-(2-Bromophenyl)-*N*-ethylbenzamide (4n):** The titled compound **4n** was synthesised

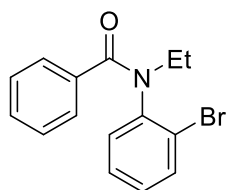

according to **GP-II** by using bromoethane (0.2 mL, 3.0 mmol, 2.0 equiv). The product **4n** was isolated after column chromatography using 15% ethyl acetate in hexane as eluent (white solid, 410 mg, 90% yield). **<sup>1</sup>H NMR** (500 MHz, CDCl<sub>3</sub>): δ (ppm) 7.52 (d, *J* = 7.8 Hz, 1H), 7.33 (d, *J* = 7.4 Hz, 2H),

7.21 – 7.11 (m, 4H), 7.05 (t, *J* = 6.9 Hz, 2H), 4.27 (dq, *J* = 14.1, 7.1 Hz, 1H), 3.57 (dq, *J* = 14.1, 7.1 Hz, 1H), 1.22 (t, *J* = 7.1 Hz, 3H). **<sup>13</sup>C {<sup>1</sup>H} NMR** (126 MHz, CDCl<sub>3</sub>): δ (ppm) 170.5, 141.9, 136.3, 133.9, 132.1, 129.7, 129.1, 128.1, 127.7, 123.5, 44.2, 12.6. **FTIR:** (neat)/ cm<sup>-1</sup> = 3057, 2981, 2931, 2870, 1638, 1577, 1472, 1435, 1391, 1304, 1115, 1029. **HRMS (ESI) *m/z*:** [M+H]<sup>+</sup> calcd for C<sub>15</sub>H<sub>15</sub>BrNO, 304.0332; found 304.0330.



***N*-(2-Bromophenyl)-*N*-hexylbenzamide (4o):** The titled compound **4o** was synthesised

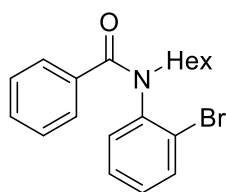

according to **GP-II** by using 1-bromohexane (0.3 mL, 2.25 mmol, 1.5 equiv). The product **4o** was isolated after column chromatography using 5% ethyl acetate in hexane as eluent (liquid, 281 mg, 50% yield). **<sup>1</sup>H NMR** (400 MHz, CDCl<sub>3</sub>): δ (ppm) 7.51 (d, *J* = 7.7 Hz, 1H), 7.31 (d, *J* = 7.5 Hz, 2H), 7.21 – 7.10 (m, 4H), 7.06 – 7.02 (m, 2H), 4.26 – 4.19 (m, 1H), 3.47 – 3.40 (m, 1H), 1.71 – 1.65 (m, 1H), 1.58 – 1.49 (m, 1H), 1.40 – 1.25 (m, 6H), 0.87 – 0.85 (m, 3H). **<sup>13</sup>C {<sup>1</sup>H} NMR** (126 MHz, CDCl<sub>3</sub>): δ (ppm) 170.6, 142.2, 136.3, 133.9, 132.0, 129.6, 129.0, 128.1, 128.0, 127.7, 123.5, 49.4, 31.7, 27.4, 26.8, 22.7, 14.1. **FTIR:** (neat)/ cm<sup>-1</sup> = 3060, 2955, 2928, 2857, 1651, 1580, 1446, 1388, 1310, 1130, 1029. **HRMS (ESI) *m/z*:** [M+H]<sup>+</sup> calcd for C<sub>19</sub>H<sub>23</sub>BrNO, 360.0958; found 360.0956.

***N*-(2-Bromo-4-methylphenyl)-*N*-tosylbenzamide (10q):**<sup>10b,12</sup> The titled compound **10q** was

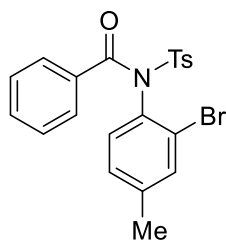

synthesised according to modified literature procedure by using the corresponding **S6** (578 mg, 2 mmol, 1.0 equiv), triethylamine (3 mmol, 1.5 equiv) and tosyl chloride (3 mmol, 1.5 equiv). The desired product **10q** was isolated after silica gel column chromatography by using 5% ethyl acetate in hexane as eluent (white solid, 799 mg, 90% yield). **<sup>1</sup>H NMR** (400 MHz, CDCl<sub>3</sub>): δ 8.00 (d, *J* = 8.2 Hz, 2H), 7.43 (d, *J* = 7.6 Hz, 2H), 7.40 (d, *J* = 8.2 Hz, 1H), 7.34 (d, *J* = 8.1 Hz, 1H), 7.30 – 7.26 (m, 1H), 7.18 – 7.11 (m, 3H), 2.45 (s, 3H), 2.28 (s, 3H). **<sup>13</sup>C {<sup>1</sup>H} NMR** (126 MHz, CDCl<sub>3</sub>): δ (ppm) 169.3, 145.2, 141.7, 136.0, 134.4, 134.2, 133.9, 133.3, 131.5, 130.2, 129.3, 129.04, 128.96, 127.8, 124.6, 21.9, 21.0. **FTIR:** (neat)/ cm<sup>-1</sup> = 1692, 1598, 1448, 1364, 1278, 1259, 1242, 1085, 1027. **HRMS (ESI) *m/z*:** [M+H]<sup>+</sup> calcd for C<sub>21</sub>H<sub>19</sub>BrNO<sub>3</sub>S, 444.0264; found 444.0272.

**4,4,5,5-Tetramethyl-2-(*p*-tolyl)-1,3,2-dioxaborolane (2a):**<sup>13a</sup> The titled compound **2a** was

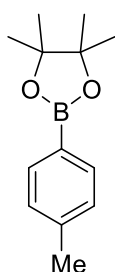

synthesised according to the **GP-III** by using 1-bromo-4-methylbenzene **1a** (62 μL, 0.5 mmol, 1.0 equiv) as prototype. The borylated product **2a** was isolated after column chromatography using 2% ethyl acetate in hexane as eluent (white solid, 79 mg, 72% yield). **<sup>1</sup>H NMR** (400 MHz, CDCl<sub>3</sub>): δ (ppm) 7.73 (d, *J* = 7.8 Hz, 2H), 7.21 (d, *J* = 7.9 Hz, 2H), 2.38 (s, 3H), 1.36 (s, 12H). **<sup>13</sup>C {<sup>1</sup>H} NMR** (101 MHz, CDCl<sub>3</sub>): δ (ppm) 141.5, 134.9, 128.6, 83.7, 25.0, 21.9. (The carbon directly attached to the boron atom was not detected due to quadrupolar broadening). **<sup>11</sup>B NMR** (160 MHz, CDCl<sub>3</sub>): δ (ppm) 31.0.

**<sup>11</sup>B NMR** (160 MHz, CDCl<sub>3</sub>): δ (ppm) 31.0.

**2-(4-(tert-Butyl)phenyl)-4,4,5,5-tetramethyl-1,3,2-dioxaborolane (2b):**<sup>13a</sup> The titled

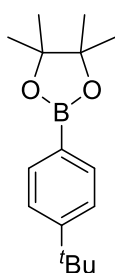

compound **2b** was synthesised according to the **GP-III** by using 1-bromo-4-(tert-butyl)benzene **1b** (87  $\mu$ L, 0.5 mmol, 1.0 equiv) as prototype. The product **2b** was isolated after column chromatography using 2% ethyl acetate in hexane as eluent (white solid, 110 mg, 85% yield). <sup>1</sup>H NMR (400 MHz, CDCl<sub>3</sub>):  $\delta$  (ppm) 7.79 (d,  $J$  = 7.7 Hz, 2H), 7.43 (d,  $J$  = 7.6 Hz, 2H), 1.36 (s, 12H), 1.35 (s, 9H). <sup>13</sup>C {<sup>1</sup>H} NMR (101 MHz, CDCl<sub>3</sub>):  $\delta$  (ppm) 154.6, 134.8, 124.8, 83.7, 35.0, 31.3, 25.0. (The carbon directly attached to the boron atom was not detected due to quadrupolar broadening). <sup>11</sup>B NMR (160 MHz, CDCl<sub>3</sub>):  $\delta$  (ppm) 31.0.

**2-(4-Methoxyphenyl)-4,4,5,5-tetramethyl-1,3,2-dioxaborolane (2c):**<sup>13a</sup> The titled compound

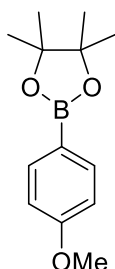

**2c** was synthesised according to the **GP-III** by using 1-bromo-4-methoxybenzene **1c** (63  $\mu$ L, 0.5 mmol, 1.0 equiv). The borylated product **2c** was isolated after column chromatography using 2% ethyl acetate in hexane as eluent (white solid, 94.8 mg, 81% yield). <sup>1</sup>H NMR (400 MHz, CDCl<sub>3</sub>):  $\delta$  (ppm) 7.78 (d,  $J$  = 8.4 Hz, 2H), 6.91 (d,  $J$  = 8.5 Hz, 2H), 3.83 (s, 3H), 1.34 (s, 12H). <sup>13</sup>C {<sup>1</sup>H} NMR (126 MHz, CDCl<sub>3</sub>):  $\delta$  (ppm) 162.3, 136.7, 113.5, 83.7, 55.2, 25.0. (The carbon directly attached to the boron atom was not detected due to quadrupolar broadening). <sup>11</sup>B NMR (160 MHz, CDCl<sub>3</sub>):  $\delta$  (ppm) 30.79.

**2-([1,1'-Biphenyl]-4-yl)-4,4,5,5-tetramethyl-1,3,2-dioxaborolane (2d):**<sup>13a</sup> The titled

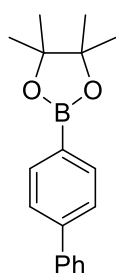

compound **2d** was synthesised according to the **GP-III** by using 4-bromo-1,1'-biphenyl **1d** (117 mg, 0.5 mmol, 1.0 equiv). The product **2d** was isolated after column chromatography using 2% ethyl acetate in hexane as eluent (white solid, 126 mg, 90% yield). <sup>1</sup>H NMR (400 MHz, CDCl<sub>3</sub>):  $\delta$  (ppm) 7.94 (d,  $J$  = 7.8 Hz, 2H), 7.66 (d,  $J$  = 7.2 Hz, 4H), 7.48 (t,  $J$  = 7.3 Hz, 2H), 7.39 (t,  $J$  = 7.0 Hz, 1H), 1.40 (s, 12H). <sup>13</sup>C {<sup>1</sup>H} NMR (126 MHz, CDCl<sub>3</sub>):  $\delta$  (ppm) 144.0, 141.2, 135.4, 128.9, 127.7, 127.4, 126.6, 83.9, 25.0. (The carbon directly attached to the boron atom was not detected due to quadrupolar broadening). <sup>11</sup>B NMR (160 MHz, CDCl<sub>3</sub>):  $\delta$  (ppm) 31.2.

**Methyl 4-(4,4,5,5-tetramethyl-1,3,2-dioxaborolan-2-yl)benzoate (2e):**<sup>13a</sup> The titled compound

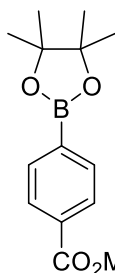

**2e** was synthesised according to the **GP-III** by using methyl 4-bromobenzoate **1e** (108 mg, 0.5 mmol, 1.0 equiv). The product **2e** was isolated after column chromatography using 4% ethyl acetate in hexane as eluent (white solid, 106 mg, 81% yield). <sup>1</sup>H NMR (500 MHz, CDCl<sub>3</sub>):  $\delta$  (ppm) 8.02 (d,  $J$  = 7.9 Hz, 2H), 7.87 (d,  $J$  = 7.9 Hz, 2H), 3.92 (s, 3H), 1.35 (s, 12H). <sup>13</sup>C {<sup>1</sup>H} NMR (126 MHz, CDCl<sub>3</sub>):

$\delta$  (ppm) 167.3, 134.8, 132.5, 128.7, 84.3, 52.3, 25.0. (The carbon directly attached to the boron atom was not detected due to quadrupolar broadening).  $^{11}\text{B}$  NMR (160 MHz,  $\text{CDCl}_3$ ):  $\delta$  (ppm) 30.8.

**4-(4,4,5,5-Tetramethyl-1,3,2-dioxaborolan-2-yl)benzonitrile (2f):**<sup>13a</sup> The titled compound **2f**

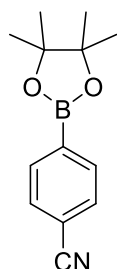

was synthesised according to the **GP-III** by using 4-bromobenzonitrile **1h** (91 mg, 0.5 mmol, 1.0 equiv). The product **2f** was isolated after column chromatography using 3% ethyl acetate in hexane as eluent (white solid, 76.7 mg, 67% yield).  $^1\text{H}$  NMR (500 MHz,  $\text{CDCl}_3$ ):  $\delta$  (ppm) 7.87 (d,  $J = 8.1$  Hz, 2H), 7.63 (d,  $J = 8.2$  Hz, 2H), 1.34 (s, 12H).  $^{13}\text{C}$   $\{^1\text{H}\}$  NMR (126 MHz,  $\text{CDCl}_3$ ):  $\delta$  (ppm) 135.2, 131.2, 119.1, 114.9, 84.6, 25.0. (The carbon directly attached to the boron atom was not detected due to quadrupolar broadening).  $^{11}\text{B}$  NMR (160 MHz,  $\text{CDCl}_3$ ):  $\delta$  (ppm) 30.6.

**Methyl 2-(2-(4,4,5,5-tetramethyl-1,3,2-dioxaborolan-2-yl)phenyl)acetate (2g):**<sup>13b</sup> The titled

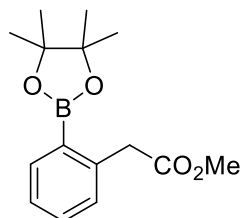

compound **2g** was synthesised according to the **GP-III** by using methyl 2-(2-bromophenyl)acetate **1i** (115 mg, 0.5 mmol, 1.0 equiv). The product **2g** was isolated after column chromatography using 5% ethyl acetate in hexane as eluent (colourless liquid, 81.4 mg, 59% yield).  $^1\text{H}$  NMR (400 MHz,  $\text{CDCl}_3$ ):  $\delta$  (ppm) 7.84 (d,  $J = 7.2$  Hz, 1H), 7.39 (dt,  $J = 7.5, 3.8$  Hz, 1H), 7.29 – 7.26 (m, 1H), 7.20 (d,  $J = 7.4$  Hz, 1H), 3.99 (s, 2H), 3.67 (s, 3H), 1.33 (s, 12H).  $^{13}\text{C}$   $\{^1\text{H}\}$  NMR (126 MHz,  $\text{CDCl}_3$ ):  $\delta$  (ppm) 173.0, 140.5, 136.2, 131.1, 130.2, 126.5, 83.8, 51.8, 41.1, 24.8. (The carbon directly attached to the boron atom was not detected due to quadrupolar broadening).  $^{11}\text{B}$  NMR (160 MHz,  $\text{CDCl}_3$ ):  $\delta$  (ppm) 31.1.

**4,4,5,5-Tetramethyl-2-(naphthalen-1-yl)-1,3,2-dioxaborolane (2h):**<sup>13a</sup> The titled compound

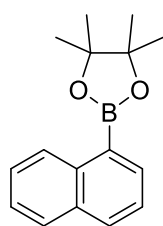

**2h** was synthesised according to the **GP-III** by using 1-bromonaphthalene **1j** (104 mg, 0.5 mmol, 1.0 equiv). The product **2h** was isolated after column chromatography using 2% ethyl acetate in hexane as eluent (white solid, 58.4 mg, 46% yield).  $^1\text{H}$  NMR (400 MHz,  $\text{CDCl}_3$ ):  $\delta$  (ppm) 8.81 (d,  $J = 8.3$  Hz, 1H), 8.13 (d,  $J = 6.4$  Hz, 1H), 7.97 (d,  $J = 8.1$  Hz, 1H), 7.87 (d,  $J = 8.0$  Hz, 1H), 7.57 (t,  $J = 7.2$  Hz, 1H), 7.51 (t,  $J = 7.4$  Hz, 2H), 1.46 (s, 12H).  $^{13}\text{C}$   $\{^1\text{H}\}$  NMR (101 MHz,  $\text{CDCl}_3$ ):  $\delta$  (ppm) 137.1, 135.8, 133.3, 131.7, 128.6, 128.5, 126.5, 125.6, 125.1, 83.8, 25.1. (The carbon directly attached to the boron atom was not detected due to quadrupolar broadening).  $^{11}\text{B}$  NMR (160 MHz,  $\text{CDCl}_3$ ):  $\delta$  (ppm) 31.8.

**4,4,5,5-Tetramethyl-2-(pyren-1-yl)-1,3,2-dioxaborolane (2i):**<sup>13c</sup> The titled compound **2i** was

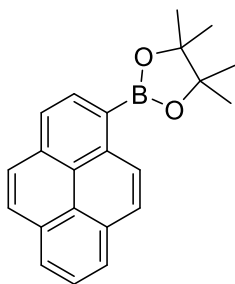

synthesised according to the **GP-III** by using 1-bromopyrene **1k** (104 mg, 0.5 mmol, 1.0 equiv). The product **2i** was isolated after column chromatography using 5% ethyl acetate in hexane as eluent (white solid, 131 mg, 80% yield). **<sup>1</sup>H NMR** (500 MHz, CDCl<sub>3</sub>): δ (ppm) 9.14 – 9.12 (m, 1H), 8.59 (ddd, *J* = 7.5, 3.1, 1.9 Hz, 1H), 8.24 (d, *J* = 7.6 Hz, 1H), 8.21 – 8.17 (m, 3H), 8.13 (d, *J* = 8.9 Hz, 1H), 8.08 (d, *J* = 8.9 Hz, 1H), 8.02 (t, *J* = 7.6 Hz, 1H), 1.53 (s, 12H). **<sup>13</sup>C {<sup>1</sup>H} NMR** (126 MHz, CDCl<sub>3</sub>): δ (ppm) 136.6, 134.0, 133.6, 131.3, 130.9, 128.7, 128.2, 127.9, 127.6, 125.8, 125.5, 125.3, 124.8, 124.5, 124.2, 84.0, 25.2. (The carbon directly attached to the boron atom was not detected due to quadrupolar broadening). **<sup>11</sup>B NMR** (160 MHz, CDCl<sub>3</sub>): δ (ppm) 31.9.

**5-(4,4,5,5-Tetramethyl-1,3,2-dioxaborolan-2-yl)-1H-indole (2j):**<sup>13d</sup> The titled compound **2j**

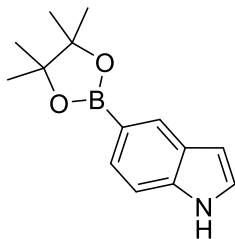

was synthesised according to the **GP-III** by using 5-bromo-1H-indole **1l** (98 mg, 0.5 mmol, 1.0 equiv). The product **2j** was isolated after column chromatography using 3% ethyl acetate in hexane as eluent (white solid, 36.5 mg, 30% yield). **<sup>1</sup>H NMR** (400 MHz, CDCl<sub>3</sub>): δ (ppm) 8.24 (br s, 1H), 8.20 (s, 1H), 7.65 (d, *J* = 8.2 Hz, 1H), 7.38 (d, *J* = 8.2 Hz, 1H), 7.18 (t, *J* = 2.7 Hz, 1H), 6.57 (s, 1H), 1.38 (s, 12H). **<sup>13</sup>C {<sup>1</sup>H} NMR** (101 MHz, CDCl<sub>3</sub>): δ (ppm) 138.0, 128.8, 128.2, 127.7, 124.3, 110.6, 103.3, 83.6, 25.0. (The carbon directly attached to the boron atom was not detected due to quadrupolar broadening). **<sup>11</sup>B NMR** (160 MHz, CDCl<sub>3</sub>): δ (ppm) 31.6.

**Methyl 5-(4,4,5,5-tetramethyl-1,3,2-dioxaborolan-2-yl)-1H-indole-1-carboxylate (2k):** The

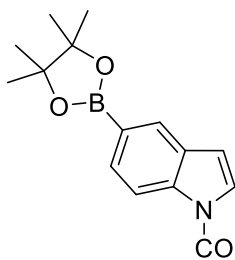

titled compound **2k** was synthesised according to the **GP-III** by using methyl 5-bromo-1H-indole-1-carboxylate **1m** (127 mg, 0.5 mmol, 1.0 equiv). The product **2k** was isolated after column chromatography using 5% ethyl acetate in hexane as eluent (white solid, 93.4 mg, 62% yield). **<sup>1</sup>H NMR** (400 MHz, CDCl<sub>3</sub>): δ (ppm) 8.17 (d, *J* = 7.8 Hz, 1H), 8.07 (s, 1H), 7.78 (d, *J* = 8.3 Hz, 1H), 7.59 (d, *J* = 3.3 Hz, 1H), 6.60 (d, *J* = 3.6 Hz, 1H), 4.04 (s, 3H), 1.37 (s, 12H). **<sup>13</sup>C {<sup>1</sup>H} NMR** (126 MHz, CDCl<sub>3</sub>): δ (ppm) 151.6, 137.4, 131.0, 130.2, 128.4, 125.7, 114.6, 108.5, 83.9, 53.9, 25.0. (The carbon directly attached to the boron atom was not detected due to quadrupolar broadening). **<sup>11</sup>B NMR** (160 MHz, CDCl<sub>3</sub>): δ (ppm) 31.4. **FTIR:** (neat)/ cm<sup>-1</sup> = 3672, 2978, 1745, 1612, 1540, 1444, 1243, 1214, 1145, 1087. **HRMS (ESI) *m/z*:** [M+H]<sup>+</sup> calcd for C<sub>16</sub>H<sub>21</sub>BNO<sub>4</sub>, 302.1558; found 302.1555.

**2-(4-(4,4,5,5-Tetramethyl-1,3,2-dioxaborolan-2-yl)phenyl)-1H-indole (2l):** The titled

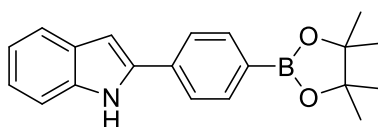

compound **2l** was synthesised according to the **GP-III** by using methyl 2-(4-bromophenyl)-1H-indole **1n** (135 mg, 0.5 mmol, 1.0 equiv). The product **2l** was isolated after column

chromatography using 3% ethyl acetate in hexane as eluent (white solid, 104 mg, 65% yield).

**<sup>1</sup>H NMR** (400 MHz, CDCl<sub>3</sub>): δ (ppm) 8.42 (s, 1H), 7.88 (d, *J* = 8.0 Hz, 2H), 7.68 (d, *J* = 8.1 Hz, 2H), 7.63 (d, *J* = 7.8 Hz, 1H), 7.40 (d, *J* = 8.1 Hz, 1H), 7.20 (t, *J* = 7.6 Hz, 1H), 7.12 (t, *J* = 7.4 Hz, 1H), 6.91 (s, 1H), 1.37 (s, 12H). **<sup>13</sup>C {<sup>1</sup>H} NMR** (101 MHz, CDCl<sub>3</sub>): δ (ppm) 137.7, 137.0, 135.6, 134.9, 129.3, 124.3, 122.8, 120.9, 120.5, 111.1, 100.8, 84.1, 25.0. (The carbon directly attached to the boron atom was not detected due to quadrupolar broadening). **<sup>11</sup>B NMR** (160 MHz, CDCl<sub>3</sub>): δ (ppm) 30.6. **FTIR:** (neat)/ cm<sup>-1</sup> = 3344, 2977, 2924, 2853, 1609, 1453, 1360, 1283, 1121. **HRMS (ESI) *m/z*:** [M+H]<sup>+</sup> calcd for C<sub>20</sub>H<sub>23</sub>BNO<sub>2</sub>, 320.1816; found 320.1820.

**3-(4,4,5,5-Tetramethyl-1,3,2-dioxaborolan-2-yl)-9H-carbazole (2m):**<sup>13e</sup> The titled compound

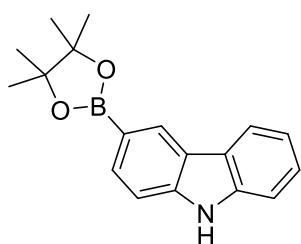

**2m** was synthesised according to the **GP-III** by using 3-bromo-9H-carbazole **1o** (123 mg, 0.5 mmol, 1.0 equiv). The product **2m** was isolated after column chromatography using 2% ethyl acetate in hexane as eluent (white solid, 88 mg, 60% yield). **<sup>1</sup>H NMR** (400 MHz, CDCl<sub>3</sub>): δ (ppm) 8.61 (s, 1H), 8.16 (br s, 1H), 8.12 (d, *J* = 7.3 Hz, 1H), 7.90 (d, *J* = 8.0 Hz, 1H), 7.44 – 7.39 (m, 3H), 7.25 (d, *J* = 7.5 Hz, 1H), 1.42 (s, 12H).

**<sup>13</sup>C {<sup>1</sup>H} NMR** (126 MHz, CDCl<sub>3</sub>): δ (ppm) 141.9, 139.6, 132.5, 127.9, 126.0, 123.6, 123.2, 120.7, 120.0, 110.7, 110.2, 83.8, 25.1. (The carbon directly attached to the boron atom was not detected due to quadrupolar broadening). **<sup>11</sup>B NMR** (160 MHz, CDCl<sub>3</sub>): δ (ppm) 31.6.

**3,6-Bis(4,4,5,5-tetramethyl-1,3,2-dioxaborolan-2-yl)-9H-carbazole (2n):**<sup>13f</sup> The titled

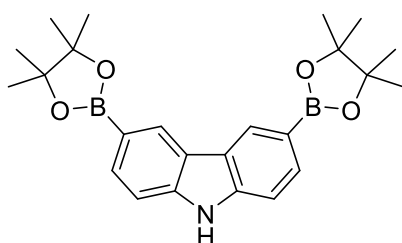

compound **2n** was synthesised according to the **GP-III** by using 3,6-dibromo-9H-carbazole **1p** (163 mg, 0.5 mmol, 1.0 equiv). The product **2n** was isolated after column chromatography using 2% ethyl acetate in hexane as eluent (white solid, 46 mg, 22% yield). In another fractions, the

debrominated mono-borylation product **2m** was isolated as major product (79 mg, 54% yield).

**<sup>1</sup>H NMR** (400 MHz, CDCl<sub>3</sub>): δ (ppm) 8.65 (s, 2H), 8.25 (br s, 1H), 7.86 (d, *J* = 8.1 Hz, 2H), 7.39 (d, *J* = 8.1 Hz, 2H), 1.39 (s, 24H). **<sup>13</sup>C {<sup>1</sup>H} NMR** (101 MHz, CDCl<sub>3</sub>): δ (ppm) 141.8,

132.5, 128.3, 123.4, 110.2, 83.8, 25.2. (The carbon directly attached to the boron atom was not detected due to quadrupolar broadening).  $^{11}\text{B}$  NMR (160 MHz,  $\text{CDCl}_3$ ):  $\delta$  (ppm) 31.5.

**1,3-Bis(4,4,5,5-tetramethyl-1,3,2-dioxaborolan-2-yl)benzene (2o).**<sup>13g</sup> The titled compound **2o**

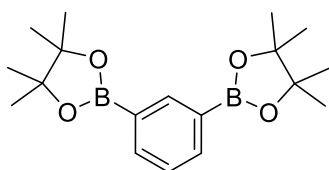

was synthesised according to the **GP-III** by using 1,3-dibromobenzene **1q** (60  $\mu\text{L}$ , 0.5 mmol, 1.0 equiv). The product **2o** was isolated after column chromatography using 2% ethyl acetate in hexane as eluent (white solid, 91 mg, 55% yield).  $^1\text{H}$  NMR (400 MHz,  $\text{CDCl}_3$ ):  $\delta$  (ppm) 8.28 (s, 1H), 7.90 (d,  $J = 8.1$  Hz, 2H), 7.38 (t,  $J = 7.4$  Hz, 1H), 1.34 (s, 24H).  $^{13}\text{C}$   $\{^1\text{H}\}$  NMR (101 MHz,  $\text{CDCl}_3$ ): 141.4, 137.8, 127.2, 83.9, 25.0.  $^{11}\text{B}$  NMR (160 MHz,  $\text{CDCl}_3$ ):  $\delta$  (ppm) 31.2.

**1,4-Bis(4,4,5,5-tetramethyl-1,3,2-dioxaborolan-2-yl)benzene (2p).**<sup>13a</sup> The titled compound **2p**

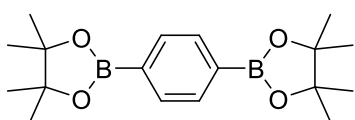

was synthesised according to the **GP-III** by using 1,4-dibromobenzene **1r** (65  $\mu\text{L}$ , 0.5 mmol, 1.0 equiv). The product **2p** was isolated after column chromatography using 2% ethyl

acetate in hexane as eluent (white solid, 119 mg, 72% yield).  $^1\text{H}$  NMR (400 MHz,  $\text{CDCl}_3$ ):  $\delta$  (ppm) 7.80 (s, 4H), 1.35 (s, 24H).  $^{13}\text{C}$   $\{^1\text{H}\}$  NMR (101 MHz,  $\text{CDCl}_3$ ):  $\delta$ (ppm) 134.0, 84.0, 25.0. (The carbon directly attached to the boron atom was not detected due to quadrupolar broadening).  $^{11}\text{B}$  NMR (160 MHz,  $\text{CDCl}_3$ ):  $\delta$  (ppm) 31.01.

**3,3'-Bis(4,4,5,5-tetramethyl-1,3,2-dioxaborolan-2-yl)-1,1'-biphenyl (2q).**<sup>13h</sup> The titled

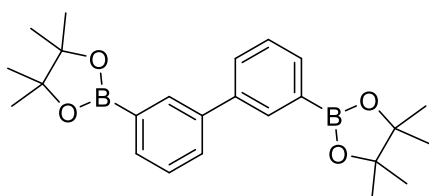

compound **2q** was synthesised according to the **GP-III** by using 3,3'-dibromo-1,1'-biphenyl **1s** (156 mg, 0.5 mmol, 1.0 equiv). The product **2q** was isolated after column chromatography using 2% ethyl acetate in hexane as eluent

(white solid, 144 mg, 71% yield).  $^1\text{H}$  NMR (400 MHz,  $\text{CDCl}_3$ ):  $\delta$  (ppm) 8.07 (s, 2H), 7.80 (d,  $J = 7.3$  Hz, 2H), 7.73 (d,  $J = 7.8$  Hz, 2H), 7.44 (t,  $J = 7.5$  Hz, 2H), 1.37 (s, 24H).  $^{13}\text{C}$   $\{^1\text{H}\}$  NMR (101 MHz,  $\text{CDCl}_3$ ):  $\delta$  (ppm) 140.7, 133.8, 133.7, 130.4, 128.2, 84.0, 25.0. (The carbon directly attached to the boron atom was not detected due to quadrupolar broadening).  $^{11}\text{B}$  NMR (160 MHz,  $\text{CDCl}_3$ ):  $\delta$  (ppm) 31.2.

**1,1'-(2,7-bis(4,4,5,5-tetramethyl-1,3,2-dioxaborolan-2-yl)-9H-fluorene-9,9-diyl)bis(hexan-**

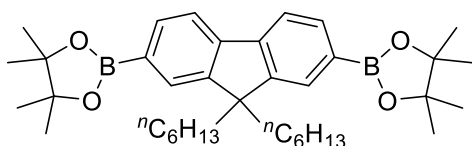

**1-one) (2r).**<sup>13i</sup> The titled compound **2r** was synthesised according to the **GP-III** by using 1,1'-(2,7-dibromo-9H-fluorene-9,9-diyl)bis(hexan-1-one) **1t** (260 mg, 0.5

mmol, 1.0 equiv). The product **2r** was isolated after column chromatography using 5% ethyl acetate in hexane as eluent (white solid, 175 mg, 57% yield).  $^1\text{H NMR}$  (400 MHz,  $\text{CDCl}_3$ ):  $\delta$  (ppm) 7.80 (d,  $J = 7.5$  Hz, 2H), 7.74 (s, 2H), 7.72 (d,  $J = 7.6$  Hz, 2H), 2.02 – 1.97 (m, 4H), 1.39 (s, 24H), 1.10 – 1.00 (m, 12H), 0.76 – 0.72 (m, 6H), 0.57 – 0.50 (m, 4H).  $^{13}\text{C}$   $\{^1\text{H}\}$  NMR (101 MHz,  $\text{CDCl}_3$ ):  $\delta$  (ppm) 150.6, 144.1, 133.8, 129.1, 119.5, 83.9, 55.3, 40.2, 31.6, 29.8, 25.1, 23.7, 22.7, 14.2. (The carbon directly attached to the boron atom was not detected due to quadrupolar broadening).

**Dimethyl [1,1'-biphenyl]-4-ylphosphonate (3a):**<sup>14</sup> The titled compound **3a** was synthesized

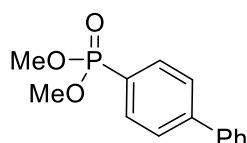

according to **GP-IV** by using 4-bromo-1,1'-biphenyl **1d** (47 mg, 0.2 mmol). The desired product **3a** was isolated after silica gel column chromatography by using 60% ethyl acetate in hexane as eluent (yellow solid, 48.2 mg, 92% yield).  $^1\text{H NMR}$  (400 MHz,  $\text{CDCl}_3$ ):  $\delta$  (ppm) 7.89 – 7.84 (m, 2H), 7.69 (dd,  $J = 7.9, 3.8$  Hz, 2H), 7.60 (d,  $J = 7.6$  Hz, 2H), 7.46 (t,  $J = 7.5$  Hz, 2H), 7.39 (t,  $J = 7.0$  Hz, 1H), 3.78 (d,  $J = 11.1$  Hz, 6H).  $^{13}\text{C}$   $\{^1\text{H}\}$  NMR (101 MHz,  $\text{CDCl}_3$ ):  $\delta$  (ppm) 145.6 (d,  $J = 3.2$  Hz) 139.9, 132.5 (d,  $J = 10.3$  Hz), 129.1, 128.3, 127.37, 127.36 (d,  $J = 15.4$  Hz), 125.4 (d,  $J = 190.7$  Hz), 52.7 (d,  $J = 5.5$  Hz).  $^{31}\text{P NMR}$  (202 MHz,  $\text{CDCl}_3$ ):  $\delta$  (ppm) 22.5.

**Dimethyl benzo[d][1,3]dioxol-5-ylphosphonate (3b):** The titled compound **3b** was synthesized

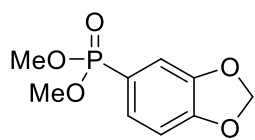

according to **GP-IV** by using 5-bromobenzo[d][1,3]dioxole **1u** (24  $\mu\text{L}$  mg, 0.2 mmol). The desired product **3b** was isolated after silica gel column chromatography by using 80% ethyl acetate in hexane as eluent (yellow oil, 22 mg, 49% yield).  $^1\text{H NMR}$  (400 MHz,  $\text{CDCl}_3$ )  $\delta$  (ppm) 7.37 (ddd,  $J = 14.0, 7.9, 0.9$  Hz, 1H), 7.18 (d,  $J = 14.1$  Hz, 1H), 6.90 (dd,  $J = 7.9, 3.7$  Hz, 1H), 6.03 (s, 2H), 3.74 (d,  $J = 11.1$  Hz, 6H).  $^{13}\text{C}$   $\{^1\text{H}\}$  NMR (101 MHz,  $\text{CDCl}_3$ ):  $\delta$  (ppm) 151.6 (d,  $J = 3.5$  Hz), 148.1 (d,  $J = 22.7$  Hz), 127.8 (d,  $J = 11.1$  Hz), 119.8 (d,  $J = 194.4$  Hz), 111.4 (d,  $J = 12.3$  Hz), 108.8 (d,  $J = 18.8$  Hz), 101.8, 52.8 (d,  $J = 5.4$  Hz).  $^{31}\text{P NMR}$  (202 MHz,  $\text{CDCl}_3$ ):  $\delta$  (ppm) 22.5. **FTIR:** (neat)/  $\text{cm}^{-1} = 3458, 2923, 2853, 1722, 1604, 1485, 1428, 1344, 1246, 1184, 1029$ . **HRMS (ESI)  $m/z$ :**  $[\text{M}+\text{H}]^+$  calcd for  $\text{C}_9\text{H}_{12}\text{O}_5\text{P}$ , 231.0417; found 231.0414.

**Dimethyl naphthalen-1-ylphosphonate (3c):**<sup>14</sup> The titled compound **3c** was synthesized

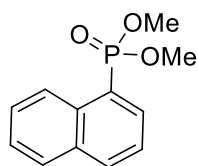

according to **GP-IV** by using 1-bromonaphthalene **1j** (28  $\mu\text{L}$ , 0.2 mmol). The desired product **3c** was isolated after silica gel column chromatography by using 50% ethyl acetate in hexane as eluent (colourless oil, 40.5 mg, 86% yield).  $^1\text{H NMR}$  (400 MHz,  $\text{CDCl}_3$ ):  $\delta$  (ppm) 8.46 (d,  $J = 8.3$  Hz, 1H), 8.23

(dd,  $J = 16.2, 6.6$  Hz, 1H), 8.05 (d,  $J = 7.9$  Hz, 1H), 7.90 (d,  $J = 7.5$  Hz, 1H), 7.63 – 7.60 (m, 1H), 7.57 – 7.51 (m, 2H), 3.79 (d,  $J = 11.3$  Hz, 6H).  $^{13}\text{C}$  { $^1\text{H}$ } NMR (101 MHz,  $\text{CDCl}_3$ ):  $\delta$  (ppm) 135.1 (d,  $J = 9.2$  Hz), 134.0 (d,  $J = 3.4$  Hz), 133.7 (d,  $J = 12.8$  Hz), 132.8 (d,  $J = 11.0$  Hz), 128.9 (d,  $J = 1.9$  Hz), 127.8, 126.59, 126.55 (d,  $J = 4.4$  Hz), 124.7 (d,  $J = 16.7$  Hz), 123.3 (d,  $J = 183.6$  Hz), 52.8 (d,  $J = 5.4$  Hz).  $^{31}\text{P}$  NMR (202 MHz,  $\text{CDCl}_3$ ):  $\delta$  (ppm) 23.0.

**Dimethyl phenanthren-9-ylphosphonate (3d):** The titled compound **3d** was synthesized

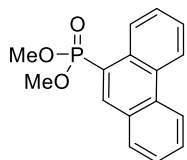

according to **GP-IV** by using 9-bromophenanthrene **1v** (52 mg, 0.2 mmol).

The desired product **3d** was isolated after silica gel column chromatography by using 50% ethyl acetate in hexane as eluent (yellow solid, 36.6 mg, 64% yield).  $^1\text{H}$  NMR (400 MHz,  $\text{CDCl}_3$ ):  $\delta$  (ppm) 8.73 (d,  $J = 7.3$  Hz, 1H), 8.69 (d,  $J = 8.4$  Hz, 1H), 8.64 (d,  $J = 18.1$  Hz, 1H), 8.48 (d,  $J = 7.6$  Hz, 1H), 8.01 (d,  $J = 7.9$  Hz, 1H), 7.77 (t,  $J = 7.6$  Hz, 1H), 7.73 – 7.64 (m, 3H), 3.82 (d,  $J = 11.3$  Hz, 6H).  $^{13}\text{C}$  { $^1\text{H}$ } NMR (126 MHz,  $\text{CDCl}_3$ ):  $\delta$  (ppm) 138.7 (d,  $J = 8.7$  Hz), 132.6 (d,  $J = 2.8$  Hz), 130.7 (d,  $J = 12.1$  Hz), 130.2, 130.0 (d,  $J = 10.2$  Hz), 129.9, 129.5, 127.6, 127.47 (d,  $J = 3.6$  Hz), 127.35, 127.3, 123.2 (d,  $J = 1.6$  Hz), 122.9, 122.2 (d,  $J = 183.3$  Hz), 52.9 (d,  $J = 5.3$  Hz).  $^{31}\text{P}$  NMR (202 MHz,  $\text{CDCl}_3$ ):  $\delta$  (ppm) 23.3. **FTIR:** (neat)/  $\text{cm}^{-1} = 3476, 2952, 2850, 1450, 1256, 1024$ . **HRMS (ESI)  $m/z$ :**  $[\text{M}+\text{H}]^+$  calcd for  $\text{C}_{16}\text{H}_{16}\text{O}_3\text{P}$ , 287.0832; found 287.0832.

**Dimethyl (4-(1H-indol-2-yl)phenyl)phosphonate (3e):** The titled compound **3e** was

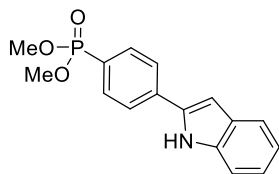

synthesized according to **GP-IV** by using methyl 2-(4-bromophenyl)-

1H-indole **1n** (57.2mg, 0.2 mmol). The desired product **3e** was isolated after silica gel column chromatography by using 80% ethyl acetate in hexane as eluent (yellow solid, 40.4 mg, 67% yield).  $^1\text{H}$  NMR (400 MHz,  $\text{CDCl}_3$ ):  $\delta$  (ppm) 9.58 (br s, 1H), 7.80 (d,  $J = 8.4$  Hz, 4H), 7.65 (d,  $J = 7.9$  Hz, 1H), 7.47 (d,  $J = 8.2$  Hz, 1H), 7.22 (t,  $J = 7.5$  Hz, 1H), 7.13 (t,  $J = 7.4$  Hz, 1H), 6.92 (s, 1H), 3.78 (d,  $J = 11.1$  Hz, 6H).  $^{13}\text{C}$  { $^1\text{H}$ } NMR (101 MHz,  $\text{CDCl}_3$ ):  $\delta$  (ppm) 137.7, 136.96 (d,  $J = 3.3$  Hz), 136.6, 132.66 (d,  $J = 10.3$  Hz), 129.1, 125.3 (d,  $J = 15.4$  Hz), 124.9 (d,  $J = 191.9$  Hz), 123.1, 121.0, 120.4, 111.5, 101.6, 53.0 (d,  $J = 5.6$  Hz).  $^{31}\text{P}$  NMR (202 MHz,  $\text{CDCl}_3$ ):  $\delta$  (ppm) 22.2. **FTIR:** (neat)/  $\text{cm}^{-1} = 3215, 2952, 1604, 1434, 1343, 1306, 1238, 1183, 1052, 1026$ . **HRMS (ESI)  $m/z$ :**  $[\text{M}+\text{H}]^+$  calcd for  $\text{C}_{16}\text{H}_{17}\text{NO}_3\text{P}$ , 302.0941; found 302.0941.



**Dimethyl (1-benzyl-1H-indol-5-yl)phosphonate (3f):** The titled compound **3f** was synthesized

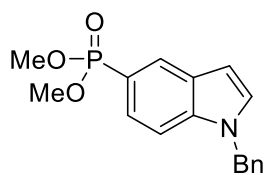

according to **GP-IV** by using 1-benzyl-5-bromo-1H-indole **1w** (55mg, 0.2 mmol). The desired product **3f** was isolated after silica gel column chromatography by using 60% ethyl acetate in hexane as eluent (yellow oil, 33 mg, 52% yield). **<sup>1</sup>H NMR** (400 MHz, CDCl<sub>3</sub>): δ (ppm) 8.18 (d, *J* = 14.4 Hz, 1H), 7.56 (dd, *J* = 11.9, 8.5 Hz, 1H), 7.37 (dd, *J* = 8.4, 3.1 Hz, 1H), 7.33 – 7.27 (m, 3H), 7.22 (d, *J* = 3.0 Hz, 1H), 7.11 (d, *J* = 7.3 Hz, 2H), 6.64 (d, *J* = 3.0 Hz, 1H), 5.35 (s, 2H), 3.75 (d, *J* = 11.1 Hz, 6H). **<sup>13</sup>C {<sup>1</sup>H} NMR** (126 MHz, CDCl<sub>3</sub>): δ (ppm) 138.4 (d, *J* = 2.8 Hz), 136.8, 129.7, 128.9, 128.4 (d, *J* = 17.9 Hz), 127.9, 126.8, 126.7 (d, *J* = 11.3 Hz), 124.5 (d, *J* = 12.1 Hz), 116.6 (d, *J* = 192.3 Hz), 110.0 (d, *J* = 16.7 Hz), 102.9 (*J* = 1.3 Hz), 52.6 (d, *J* = 5.3 Hz), 50.28. **<sup>31</sup>P NMR** (202 MHz, CDCl<sub>3</sub>): δ (ppm) 25.6. **FTIR:** (neat)/ cm<sup>-1</sup> = 3458, 3029, 2951, 2851, 1717, 1608, 1454, 1336, 1243, 1183, 1026. **HRMS (ESI) *m/z*:** [M+H]<sup>+</sup> calcd for C<sub>17</sub>H<sub>19</sub>NO<sub>3</sub>P, 316.1097; found 316.1098.

**5-Methylphenanthridin-6(5H)-one (5a):**<sup>15a</sup> The titled compound **5a** was synthesized

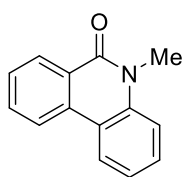

according to **GP-V** by using *N*-(2-bromophenyl)-*N*-methylbenzamide **4a** (145 mg, 0.5 mmol). The desired product **5a** was isolated after silica gel column chromatography by using 4% ethyl acetate in hexane as eluent (white solid, 93 mg, 89% yield). **<sup>1</sup>H NMR** (400 MHz, CDCl<sub>3</sub>): δ (ppm) 8.51 (dd, *J* = 8.0, 1.0 Hz, 1H), 8.19 (d, *J* = 8.1 Hz, 2H), 7.70 (t, *J* = 8.3 Hz, 1H), 7.54 (t, *J* = 8.0 Hz, 1H), 7.49 (t, *J* = 8.5 Hz, 1H), 7.34 (d, *J* = 8.1 Hz, 1H), 7.26 (t, *J* = 8.0 Hz, 1H), 3.75 (s, 3H). **<sup>13</sup>C {<sup>1</sup>H} NMR** (101 MHz, CDCl<sub>3</sub>): δ (ppm) 161.6, 138.0, 133.5, 132.4, 129.6, 128.9, 128.0, 125.6, 123.2, 122.5, 121.6, 119.3, 115.0, 30.0.

**5,8-Dimethylphenanthridin-6(5H)-one (5b):**<sup>15b</sup> The titled compound **5b** was synthesized

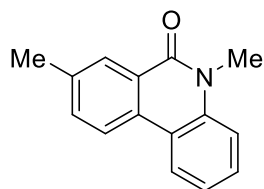

according to **GP-V** by using *N*-(2-bromophenyl)-*N*,3-dimethylbenzamide **4d** (152 mg, 0.5 mmol). The desired product **5b** was isolated after silica gel column chromatography by using 7% ethyl acetate in hexane as eluent (white solid, 61.5 mg, 55% yield). **<sup>1</sup>H NMR** (400 MHz, CDCl<sub>3</sub>): δ (ppm) 8.35 (s, 1H), 8.26 (d, *J* = 7.6 Hz, 1H), 8.18 (d, *J* = 8.2 Hz, 1H), 7.59 – 7.51 (m, 2H), 7.42 (d, *J* = 8.3 Hz, 1H), 7.32 (t, *J* = 7.6 Hz, 1H), 3.82 (s, 3H), 2.53 (s, 3H). **<sup>13</sup>C {<sup>1</sup>H} NMR** (101 MHz, CDCl<sub>3</sub>): δ (ppm) 161.9, 138.3, 137.8, 133.9, 131.2, 129.2, 128.8, 125.6, 123.1, 122.6, 121.8, 119.6, 115.2, 30.2, 21.5.

**5,9-Dimethylphenanthridin-6(5H)-one (5c):**<sup>15a</sup> The titled compound **5c** was synthesized

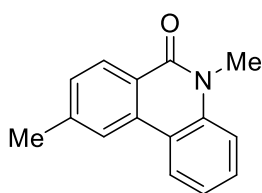

according to **GP-V** by using *N*-(2-bromophenyl)-*N*,4-dimethylbenzamide **4e** (153 mg, 0.5 mmol). The desired product **5c** was isolated after silica gel column chromatography by using 6% ethyl acetate in hexane as eluent (white solid, 73 mg, 65% yield). <sup>1</sup>H NMR (400 MHz, CDCl<sub>3</sub>): δ (ppm) 8.43 (d, *J* = 8.1 Hz, 1H), 8.28 (d, *J* = 7.7 Hz, 1H), 8.06 (s, 1H), 7.54 (t, *J* = 7.8 Hz, 1H), 7.41 (d, *J* = 8.6 Hz, 2H), 7.31 (t, *J* = 7.6 Hz, 1H), 3.81 (s, 3H), 2.56 (s, 3H). <sup>13</sup>C {<sup>1</sup>H} NMR (126 MHz, CDCl<sub>3</sub>): δ (ppm) 161.9, 143.0, 138.4, 133.7, 129.6, 129.5, 129.1, 123.5, 123.3, 122.5, 121.8, 119.5, 115.2, 30.0, 22.3.

**9-Methoxy-5-methylphenanthridin-6(5H)-one (5d):**<sup>15a</sup> The titled compound **5d** was

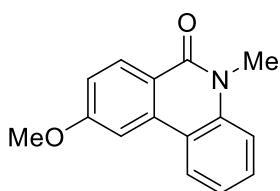

synthesized according to **GP-V** by using *N*-(2-bromophenyl)-4-methoxy-*N*-methylbenzamide **4f** (160 mg, 0.5 mmol). The desired product **5d** was isolated after silica gel column chromatography by using 20% ethyl acetate in hexane as eluent (white solid, 84 mg, 70% yield). <sup>1</sup>H NMR (400 MHz, CDCl<sub>3</sub>): δ (ppm) 8.48 (d, *J* = 8.8 Hz, 1H), 8.21 (d, *J* = 8.0 Hz, 1H), 7.64 (s, 1H), 7.55 (t, *J* = 7.7 Hz, 1H), 7.40 (d, *J* = 8.5 Hz, 1H), 7.31 (t, *J* = 7.5 Hz, 1H), 7.15 (d, *J* = 8.9 Hz, 1H), 3.99 (s, 3H), 3.79 (s, 3H). <sup>13</sup>C {<sup>1</sup>H} NMR (126 MHz, CDCl<sub>3</sub>): δ (ppm) 163.1, 161.6, 138.7, 135.7, 131.3, 129.9, 123.4, 122.4, 119.6, 119.3, 116.0, 115.3, 104.7, 55.7, 29.9.

**8,9-Dimethoxy-5-methylphenanthridin-6(5H)-one (5e):**<sup>15b</sup> The titled compound **5e** was

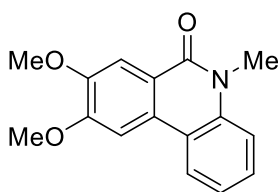

synthesized according to **GP-V** by using *N*-(2-bromophenyl)-3,4-dimethoxy-*N*-methylbenzamide **4g** (175 mg, 0.5 mmol). The desired product **5e** was isolated after silica gel column chromatography by using 25% ethyl acetate in hexane as eluent (white solid, 78 mg, 58% yield). <sup>1</sup>H NMR (400 MHz, CDCl<sub>3</sub>): δ (ppm) 8.16 (d, *J* = 8.0 Hz, 1H), 7.94 (s, 1H), 7.60 (s, 1H), 7.52 (t, *J* = 7.7 Hz, 1H), 7.42 (d, *J* = 8.4 Hz, 1H), 7.32 (t, *J* = 7.6 Hz, 1H), 4.09 (s, 3H), 4.04 (s, 3H), 3.82 (s, 3H). <sup>13</sup>C {<sup>1</sup>H} NMR (126 MHz, CDCl<sub>3</sub>): δ (ppm) 161.4, 153.5, 150.1, 137.8, 128.8, 128.5, 119.9, 119.4, 109.4, 102.8, 56.4, 56.3, 30.1.

**9-Fluoro-5-methylphenanthridin-6(5H)-one (5f):**<sup>15a</sup> The titled compound **5f** was synthesized

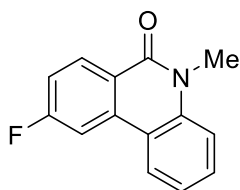

according to **GP-V** by using *N*-(2-bromophenyl)-4-fluoro-*N*-methylbenzamide **4h** (154 mg, 0.5 mmol). The desired product **5f** was isolated after silica gel column chromatography by using 5% ethyl acetate

in hexane as eluent (white solid, 82 mg, 72% yield).  $^1\text{H NMR}$  (400 MHz,  $\text{CDCl}_3$ ):  $\delta$  (ppm) 8.56 (dd,  $J = 8.6, 6.3$  Hz, 1H), 8.16 (d,  $J = 8.0$  Hz, 1H), 7.89 – 7.86 (m, 1H), 7.59 (t,  $J = 7.8$  Hz, 1H), 7.42 (d,  $J = 8.4$  Hz, 1H), 7.34 (t,  $J = 7.6$  Hz, 1H), 7.30 – 7.26 (m, 1H), 3.80 (s, 3H).  $^{13}\text{C}$   $\{^1\text{H}\}$  NMR (101 MHz,  $\text{CDCl}_3$ ):  $\delta$  (ppm) 165.7 (d,  $J = 252.1$  Hz), 161.1, 138.6, 136.3 (d,  $J = 9.5$  Hz), 132.3 (d,  $J = 9.8$  Hz), 130.5, 123.6, 122.7, 122.3, 118.7 (d,  $J = 3.1$  Hz), 116.4 (d,  $J = 22.9$  Hz), 115.4, 107.7 (d,  $J = 23.3$  Hz), 30.1.  $^{19}\text{F}$   $\{^1\text{H}\}$  (471 MHz,  $\text{CDCl}_3$ ):  $\delta$  (ppm) -145.9.

**2,5-Dimethylphenanthridin-6(5H)-one (5g):**<sup>15c</sup> The titled compound **5g** was synthesized

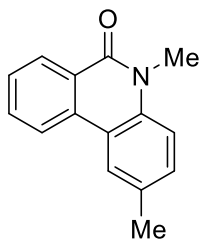

according to **GP-V** by using *N*-(2-bromo-4-methylphenyl)-*N*-methylbenzamide **4j** (153 mg, 0.5 mmol). The desired product **5g** was isolated as white solid after silica gel column chromatography by using 7% ethyl acetate in hexane as eluent (74 mg, 66% yield).  $^1\text{H NMR}$  (400 MHz,  $\text{CDCl}_3$ ):  $\delta$  (ppm) 8.55 (d,  $J = 8.0$  Hz, 1H), 8.28 (d,  $J = 8.1$  Hz, 1H), 8.09 (s,

1H), 7.75 (t,  $J = 7.6$  Hz, 1H), 7.58 (t,  $J = 7.6$  Hz, 1H), 7.37 (d,  $J = 8.6$  Hz, 1H), 7.32 (d,  $J = 8.5$  Hz, 1H), 3.81 (s, 3H), 2.50 (s, 3H).  $^{13}\text{C}$   $\{^1\text{H}\}$  NMR (101 MHz,  $\text{CDCl}_3$ ):  $\delta$  (ppm) 161.6, 136.1, 133.6, 132.4, 132.1, 130.7, 129.1, 128.0, 125.8, 123.5, 121.7, 119.3, 115.1, 30.1, 21.1.

**2-Methoxy-5-methylphenanthridin-6(5H)-one (5h):**<sup>15c</sup> The titled compound **5h** was

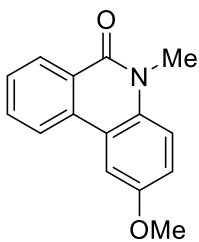

synthesized according to **GP-V** by using *N*-(2-bromo-4-methoxyphenyl)-*N*-methylbenzamide **4k** (160 mg, 0.5 mmol). The desired product **5h** was isolated as white solid after silica gel column chromatography by using 30% ethyl acetate in hexane as eluent (74.2 mg, 62% yield).  $^1\text{H NMR}$  (400 MHz,  $\text{CDCl}_3$ ):  $\delta$  (ppm) 8.56 (d,  $J = 8.0$  Hz, 1H), 8.22 (d,  $J = 8.1$  Hz, 1H), 7.77 –

7.74 (m, 2H), 7.59 (t,  $J = 7.5$  Hz, 1H), 7.36 (d,  $J = 9.1$  Hz, 1H), 7.15 (dd,  $J = 9.1, 2.8$  Hz, 1H), 3.94 (s, 3H), 3.80 (s, 3H).  $^{13}\text{C}$   $\{^1\text{H}\}$  NMR (126 MHz,  $\text{CDCl}_3$ ):  $\delta$  (ppm) 161.4, 155.3, 133.4, 132.6, 132.4, 129.2, 128.3, 126.1, 121.8, 120.4, 116.7, 116.4, 107.3, 55.9, 30.2.

**5-Methyl-2-(trifluoromethyl)phenanthridin-6(5H)-one (5i):**<sup>15d</sup> The titled compound **5i** was

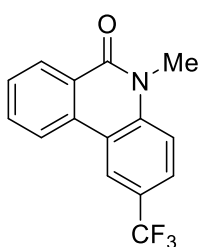

synthesized according to **GP-V** by using *N*-(2-bromo-4-(trifluoromethyl)phenyl)-*N*-methylbenzamide **4l** (180 mg, 0.5 mmol). The desired product **5i** was isolated after silica gel column chromatography by using 9% ethyl acetate in hexane as eluent (white solid, 90 mg, 65% yield).

$^1\text{H NMR}$  (400 MHz,  $\text{CDCl}_3$ ):  $\delta$  (ppm) 8.55 (d,  $J = 7.9$  Hz, 1H), 8.50 (s, 1H), 8.28 (d,  $J = 8.1$  Hz, 1H), 7.81 (t,  $J = 7.7$  Hz, 1H), 7.77 (d,  $J = 8.8$  Hz, 1H), 7.65 (t,  $J = 7.6$  Hz, 1H), 7.50 (d,  $J = 8.8$  Hz, 1H), 3.83 (s, 3H).  $^{13}\text{C}$   $\{^1\text{H}\}$  NMR (101 MHz,  $\text{CDCl}_3$ ):  $\delta$  (ppm) 161.7,

140.4, 133.0, 132.7, 129.2, 129.0, 126.2 (q,  $J = 3.5$  Hz), 125.9, 124.7 (q,  $J = 33.2$  Hz), 124.4 (q,  $J = 271.7$  Hz), 121.9, 120.8 (q,  $J = 3.9$  Hz), 119.4, 115.6, 30.4.  $^{19}\text{F}$   $\{^1\text{H}\}$  NMR (471 MHz,  $\text{CDCl}_3$ ):  $\delta$  (ppm) -61.72.

**1'-Methyl-3-(trifluoromethyl)spiro[cyclohexane-1,3'-indoline]-2,5-dien-2'-one (5'a):** The

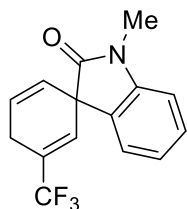

titled compound **5'a** was synthesized according to **GP-V** by using *N*-(2-bromophenyl)-*N*-methyl-3-(trifluoromethyl)benzamide **4i** (179 mg, 0.5 mmol). The desired product **5'a** was isolated after silica gel column chromatography by using 5% ethyl acetate in hexane as eluent (brown solid, 81 mg, 58% yield).  $^1\text{H}$  NMR (500 MHz,  $\text{CDCl}_3$ ):  $\delta$  (ppm) 7.36 – 7.31 (m, 1H), 7.09 – 7.08 (m, 2H), 6.88 (d,  $J = 7.8$  Hz, 1H), 6.21 – 6.17 (m, 1H), 5.98 (s, 1H), 5.44 (dd,  $J = 9.9, 2.0$  Hz, 1H), 3.25 (s, 3H), 3.11 (d,  $J = 22.6$  Hz, 1H), 3.00 (d,  $J = 22.4$  Hz, 1H).  $^{13}\text{C}$   $\{^1\text{H}\}$  NMR (126 MHz,  $\text{CDCl}_3$ ):  $\delta$  (ppm) 176.1, 143.2, 132.4, 130.6, 129.4, 129.0 (q,  $J = 31.1$  Hz), 126.7 (q,  $J = 5.8$  Hz), 125.9, 125.1, 123.5 (q,  $J = 272.4$  Hz), 123.4, 123.3, 108.5, 52.0, 26.9, 23.4.  $^{19}\text{F}$  NMR (471 MHz,  $\text{CDCl}_3$ ):  $\delta$  (ppm) -109.7. FTIR: (neat)/  $\text{cm}^{-1} = 2924, 2854, 1711, 1610, 1490, 1470, 1211, 1369, 1343, 1258, 1182, 1201$ . HRMS (ESI)  $m/z$ :  $[\text{M}+\text{H}]^+$  calcd for  $\text{C}_{15}\text{H}_{13}\text{F}_3\text{NO}$ , 280.0944; found 280.0946.

**1-Methyl-4'H-spiro[indoline-3,1'-naphthalen]-2-one (5'b):**<sup>15e</sup> The titled compound **5'b** was

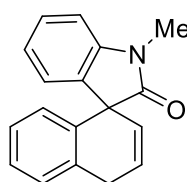

synthesized according to **GP-V** by using *N*-(2-bromophenyl)-*N*-methyl-1-naphthamide **4m** (170 mg, 0.5 mmol). The desired product **5'b** was isolated after silica gel column chromatography by using 5% ethyl acetate in hexane as eluent (white solid, 81 mg, 62% yield).  $^1\text{H}$  NMR (500 MHz,  $\text{CDCl}_3$ ):  $\delta$  (ppm) 7.32 (t,  $J = 7.9$  Hz, 1H), 7.26 – 7.24 (d,  $J = 9.5$  Hz, 1H), 7.19 (t,  $J = 7.4$  Hz, 1H), 7.06 – 7.01 (m, 3H), 6.94 (d,  $J = 8.5$  Hz, 1H), 6.55 (d,  $J = 7.8$  Hz, 1H), 6.35 – 6.31 (m, 1H), 5.57 (d,  $J = 9.8$  Hz, 1H), 3.80 (d,  $J = 21.8$  Hz, 1H), 3.59 (dd,  $J = 21.8, 3.8$  Hz, 1H), 3.27 (s, 3H).  $^{13}\text{C}$   $\{^1\text{H}\}$  NMR (126 MHz,  $\text{CDCl}_3$ ):  $\delta$  (ppm) 178.4, 143.9, 136.0, 134.5, 134.4, 128.9, 128.6, 128.2, 127.5, 127.0, 126.8, 125.6, 124.9, 123.4, 108.2, 54.9, 30.2, 26.8.

**1,2-Diphenylethane-1,2-diol (7a):**<sup>11</sup> The titled compound **7a** was synthesized according to the

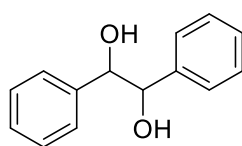

**GP-VI** by using benzaldehyde **6a** (51  $\mu\text{L}$ , 0.5 mmol, 1.0 equiv). The reaction was continued for 2 h. The desired product **7a** was isolated after column chromatography on silica gel using 20% ethyl acetate in hexane as eluent (white solid, 45 mg, 84% yield). *meso:dl* 1:1.05.  $^1\text{H}$  NMR (400 MHz,  $\text{CDCl}_3$ ):  $\delta$

(ppm) 7.33 – 7.30 (m, 6H), 7.23 – 7.22 (m, 10H), 7.11 – 7.09 (m, 4H), 4.80 (s, 2H, *meso*), 4.66 (s, 1.05 × 2H, *dl*), 3.12 (s, 1.05 × 2H, *dl*), 2.46 (br s, 2H, *meso*).

**1,2-Bis(2-methoxyphenyl)ethane-1,2-diol (7b):**<sup>11</sup> The titled compound **7b** was synthesized

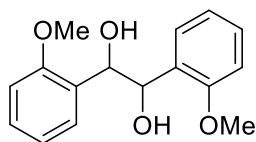

according to the **GP-VI** by using 2-methoxybenzaldehyde **6b** (60  $\mu$ L, 0.5 mmol, 1.0 equiv). The reaction was continued for 1.5 h. The desired product **7b** was isolated after column chromatography on silica gel using 30% ethyl acetate in hexane as eluent (colorless oil, 55.5 mg, 81% yield). *meso:dl* 1:1.1. <sup>1</sup>H NMR (400 MHz, CDCl<sub>3</sub>):  $\delta$  (ppm) 7.23 – 7.15 (m 8H), 6.90 – 6.85 (m, 4H), 6.80 (d, *J* = 8.2 Hz, 2H), 6.75 (d, *J* = 8.6 Hz, 2H), 5.26 (s, 2H, *meso*), 5.04 (s, 1.1 × 2H, *dl*), 3.67 (s, 6H, *meso*), 3.64 (s, 1.1 × 6H, *dl*), 3.52 (br s, 1.1 × 2H, *dl*), 3.21 (br s, 2H, *meso*).

**1,2-Bis(4-methoxyphenyl)ethane-1,2-diol (7c):**<sup>11</sup> The titled compound **7c** was synthesized

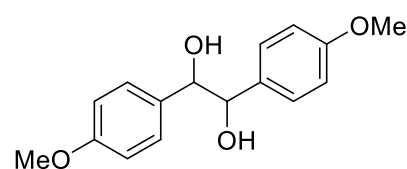

according to the **GP-VI** by using 4-methoxybenzaldehyde **6c** (60  $\mu$ L, 0.5 mmol, 1.0 equiv). The reaction was continued for 2 h. The desired product **7c** was isolated after column chromatography on silica gel using 30% ethyl acetate in hexane as eluent (white solid, 48 mg, 70% yield). *meso:dl* 1:2.52. <sup>1</sup>H NMR (400 MHz, CDCl<sub>3</sub>):

$\delta$  (ppm) 7.19 (dd, *J* = 8.6, 1.6 Hz, 4H), 7.02 (dd, *J* = 8.6, 1.6 Hz, 10H), 6.85 (dd, *J* = 8.6, 1.6 Hz, 4H), 6.75 (dd, *J* = 8.6, 1.7 Hz, 10H), 4.72 (s, 2H, *meso*), 4.61 (s, 2.52 × 2H, *dl*), 3.80 (s, 6H, *meso*), 3.76 (s, 2.52 × 6H, *dl*), 2.95 (br s, 2.52 × 2H, *dl*), 2.22 (br s, 2H, *meso*).

**1,2-Bis(2-fluorophenyl)ethane-1,2-diol (7d):** The titled compound **7d** was synthesized

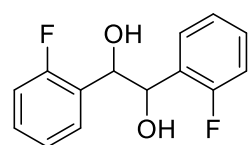

according to the **GP-VI** by using 2-fluorobenzaldehyde **6d** (53  $\mu$ L, 0.5 mmol, 1.0 equiv). The reaction was continued for 2 h. The desired product **7d** was isolated after column chromatography on silica gel using 30%

ethyl acetate in hexane as eluent (white solid, 40 mg, 64% yield). *meso:dl* 1:1.26. <sup>1</sup>H NMR (400 MHz, CDCl<sub>3</sub>):  $\delta$  (ppm) 7.44 (t, *J* = 6.8 Hz, 2H), 7.26 – 7.25 (m, 1H), 7.23 – 7.18 (m, 6H), 7.10 (t, *J* = 7.5 Hz, 3H), 7.03 (t, *J* = 7.5 Hz, 2H), 6.93 – 6.88 (m, 4H), 5.35 (s, 2H, *meso*), 5.14 (s, 1.26 × 2H, *dl*), 2.98 (br s, 4.5H, 2H *meso* and 1.26 × 2 H *dl*). <sup>13</sup>C {<sup>1</sup>H} NMR (126 MHz, CDCl<sub>3</sub>):  $\delta$  (ppm) 161.2, 161.1, 159.3, 159.1, 129.7, 129.6, 129.41, 129.35, 128.60, 128.57, 128.44, 128.41, 127.2, 127.1, 126.6, 126.5, 124.2, 123.94, 123.92, 115.4, 115.2, 115.0, 114.8, 72.01, 70.64 (all signal for both the diastereomers are reported) <sup>19</sup>F NMR (471 MHz, CDCl<sub>3</sub>)  $\delta$  (ppm) -118.16, -118.60. **FTIR:** (neat)/ cm<sup>-1</sup> = 3372, 2925, 1618, 1588, 1489, 1456, 1398,

1271, 1227, 1102, 1034. **HRMS (ESI)  $m/z$ :**  $[M+Na]^+$  calcd for  $C_{14}H_{12}F_2NaO_2$ , 273.0698 found 273.0703.

**1,2-Bis(4-fluorophenyl)ethane-1,2-diol (7e):**<sup>11</sup> The titled compound **7e** was synthesized

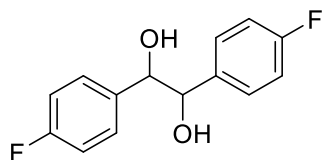

according to the **GP-VI** by using 4-fluorobenzaldehyde **6e** (54  $\mu$ L, 0.5 mmol, 1.0 equiv). The reaction was continued for 2 h. The desired product **7e** was isolated after column chromatography on silica gel using 30% ethyl acetate in hexane as eluent (white solid, 62 mg, 99% yield). **meso:dl**

1.3:1.  **$^1H$  NMR** (500 MHz,  $CDCl_3$ ):  $\delta$  (ppm) 7.17 – 7.14 (m,  $1.3 \times 4H$ , *meso*), 7.07 – 7.04 (m, 4H, *dl*), 6.99 – 6.96 (m,  $1.3 \times 4H$ , *dl*), 6.93 – 6.90 (m, 4H, *meso*), 4.82 (s,  $1.3 \times 2H$ , *meso*), 4.63 (s, *dl*), 2.90 (s, 2H, *dl*), 2.31 (s,  $1.3 \times 2H$  *meso*).

**4,4'-(1,2-Dihydroxyethane-1,2-diyl)dibenzonitrile (7f):**<sup>11</sup> The titled compound **7f** was

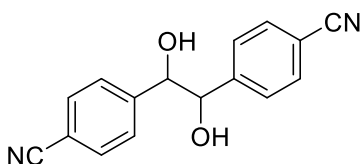

synthesized according to the **GP-VI** by using 4-formylbenzonitrile **6f** (66 mg, 0.5 mmol, 1.0 equiv). The reaction was continued for 15 h. The desired product **7f** was isolated after column chromatography on silica gel using 50% ethyl acetate in hexane as eluent (orange solid, 47 mg, 71% yield). **meso:dl** 1:1.5.  **$^1H$  NMR** (400 MHz,  $DMSO-d_6$ ):  $\delta$  (ppm) 7.73 (d,  $J = 7.9$  Hz,  $1.5 \times 4H$ , *dl*), 7.68 (d,  $J = 7.9$  Hz, 4H, *meso*), 7.43 (d,  $J = 7.8$  Hz,  $1.5 \times 4H$ , *dl*), 7.34 (d,  $J = 7.9$  Hz, 4H, *meso*), 5.75 (s, 2H, *meso*), 5.69 (s,  $1.5 \times 2H$ , *dl*), 4.83 (s, 2H, *meso*), 4.69 (s,  $1.5 \times 2H$ , *dl*).

**2,3-Diphenylbutane-2,3-diol (7g):**<sup>11</sup> The titled compound **7g** was synthesized according to the **GP-VI** by using acetophenone **6g** (58  $\mu$ L, 0.5 mmol, 1.0 equiv). The reaction was continued for 2 h. The desired product **7g** was isolated after column chromatography on silica gel using 50% ethyl acetate in hexane as eluent (white solid, 46 mg, 76% yield). **meso:dl** 1:1.11.  **$^1H$  NMR** (400 MHz,  $CDCl_3$ )  $\delta$  (ppm) 7.29-7.21 (m, 10H *meso* and  $1.11 \times 10H$  *dl*), 2.82 (s,  $1.11 \times 2H$ , *dl*), 2.51 (s, 2H, *meso*), 1.61 (s, 6H, *meso*), 1.52 (s,  $1.11 \times 6H$ , *dl*).

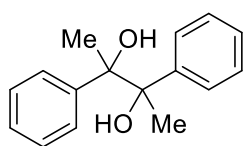

**GP-VI** by using acetophenone **6g** (58  $\mu$ L, 0.5 mmol, 1.0 equiv). The reaction was continued for 2 h. The desired product **7g** was isolated after column chromatography on silica gel using 50% ethyl acetate in hexane

as eluent (white solid, 46 mg, 76% yield). **meso:dl** 1:1.11.  **$^1H$  NMR** (400 MHz,  $CDCl_3$ )  $\delta$  (ppm) 7.29-7.21 (m, 10H *meso* and  $1.11 \times 10H$  *dl*), 2.82 (s,  $1.11 \times 2H$ , *dl*), 2.51 (s, 2H, *meso*), 1.61 (s, 6H, *meso*), 1.52 (s,  $1.11 \times 6H$ , *dl*).

**2,3-Bis(4-methoxyphenyl)butane-2,3-diol (7h):**<sup>11</sup> The titled compound **7h** was synthesized

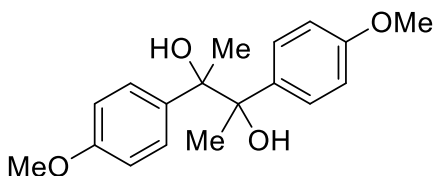

according to the **GP-VI** by using 1-(4-methoxyphenyl)ethan-1-one **6h** (75 mg, 0.5 mmol, 1.0 equiv). The reaction was continued for 2 h. The desired product **7h** was isolated after column chromatography on silica gel using 30% ethyl acetate in hexane as eluent (white solid, 48 mg, 63% yield). **meso:dl**

silica gel using 30% ethyl acetate in hexane as eluent (white solid, 48 mg, 63% yield). **meso:dl**

1:1.2  $^1\text{H}$  NMR (400 MHz,  $\text{CDCl}_3$ )  $\delta$  7.11 (dd,  $J = 12.8, 8.8$  Hz, 8H), 6.76 (dd,  $J = 8.8, 6.2$  Hz, 8H), 3.80 (s,  $1.18 \times 6\text{H}$ , *dl*), 3.78 (s, 6H, *meso*), 2.64 (s,  $1.2 \times 2\text{H}$ , *dl*), 2.35 (s, 2H, *meso*), 1.55 (s, 6H, *meso*), 1.46 (s,  $1.2 \times 6\text{H}$ , *dl*).

**1,1,2,2-Tetraphenylethane-1,2-diol (7i):**<sup>11</sup> The titled compound **7i** was synthesized according

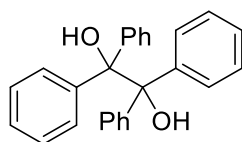

to the **GP-VI** by using benzophenone **6i** (91 mg, 0.5 mmol, 1.0 equiv).

The reaction was continued for 2 h. The desired product **7i** was isolated after column chromatography on silica gel using 50% ethyl acetate in hexane as eluent (white solid, 87 mg, 95% yield).  $^1\text{H}$  NMR (500 MHz,  $\text{CDCl}_3$ )  $\delta$  (ppm) 7.34 – 7.32 (m, 8H), 7.22 – 7.13 (m, 12H), 3.06 (br s, 2H).

***N*<sup>1</sup>,*N*<sup>2</sup>-Dibenzyl-1,2-diphenylethane-1,2-diamine (9a):**<sup>11</sup> The titled compound **9a** was

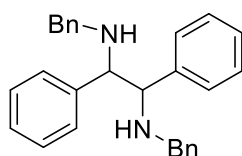

synthesized according to the **GP-VII** by using (*E*)-*N*-benzyl-1-

phenylmethanimine **8a** (98 mg, 0.5 mmol, 1.0 equiv). The reaction was continued for 2 h. The desired product **9a** was isolated after column chromatography on neutral activated aluminium oxide using 2% ethyl acetate in hexane as eluent (white solid, 87 mg, 89% yield). The ratio *meso:dl* 1:1.82 was determined by  $^1\text{H}$  NMR analysis of the crude reaction mixture.  $^1\text{H}$  NMR (400 MHz,  $\text{CDCl}_3$ )  $\delta$  (ppm):  $\delta$  7.36 – 7.28 (m, 10H), 7.24 – 7.15 (m, 6H), 6.98 (d,  $J = 6.6$  Hz, 4H), 3.76 (s, 2H), 3.55 (d,  $J = 13.8$  Hz, 2H), 3.31 (d,  $J = 13.7$  Hz, 2H), 1.68 (s, 2H).

***N*<sup>1</sup>,*N*<sup>2</sup>-Dibenzyl-1,2-bis(2-methoxyphenyl)ethane-1,2-diamine (9b):**<sup>11</sup> The titled compound

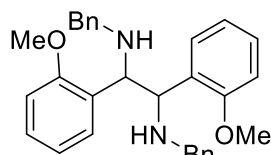

**9b** was synthesized according to the **GP-VII** by using (*E*)-*N*-benzyl-1-

(2-methoxyphenyl)methanimine **8b** (113 mg, 0.5 mmol, 1.0 equiv). The reaction was continued for 1.5 h. The desired product **9b** was isolated after column chromatography on neutral activated aluminium oxide using 5% ethyl acetate in hexane as eluent (greenish yellow liquid, 59 mg, 52% yield, major diastereomer). The ratio *meso:dl* 1:1.23 was determined by  $^1\text{H}$  NMR analysis of the crude reaction mixture.  $^1\text{H}$  NMR (400 MHz,  $\text{CDCl}_3$ ):  $\delta$  (ppm)  $\delta$  7.28 – 7.18 (m, 14H), 6.88 (t,  $J = 7.0$  Hz, 2H), 6.79 (d,  $J = 7.9$  Hz, 2H), 4.53 (s, 2H), 3.65 (d,  $J = 13.3$  Hz, 2H), 3.56 (s, 6H), 3.48 (d,  $J = 13.4$  Hz, 2H), 2.04 (s, 2H).

***N*<sup>1</sup>,*N*<sup>2</sup>-dibenzyl-1,2-bis(4-methoxyphenyl)ethane-1,2-diamine (9c):**<sup>11</sup> The titled compound **9c**

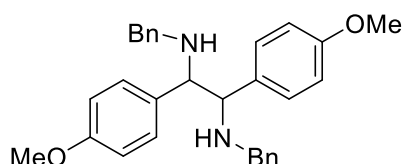

was synthesized according to the **GP-VII** by using (*E*)-*N*-benzyl-1-(4-methoxyphenyl)methanimine **8c** (113 mg, 0.5 mmol, 1.0 equiv). The reaction was continued for 2 h. The

desired product **9c** was isolated after column chromatography on neutral activated aluminium oxide using 10% ethyl acetate in hexane as eluent (white solid, 77 mg, 68% yield). *meso:dl* 1:2.38. <sup>1</sup>H NMR (500 MHz, CDCl<sub>3</sub>): δ (ppm) 7.25 – 7.08 (m, 34H), 6.91 – 6.88 (m, 13H), 6.80 (d, *J* = 7.3 Hz, 10H), 6.64 (d, *J* = 8.2 Hz, 3H), 3.75 (s, 14H), 3.72 (s, 1H), 3.67 (s, 5H), 3.58 (d, *J* = 10.0 Hz, 8H), 3.46 (d, *J* = 13.8 Hz, 5H), 3.41 (d, *J* = 13.4 Hz, 2H, *meso*), 3.21 (d, *J* = 13.8 Hz, 2 × 2.38 H, *dl*), 1.76 (br s, 8H).

**Dimethyl 4,4'-(1,2-bis(benzylamino)ethane-1,2-diyl)dibenzoate (9d):**<sup>11</sup> The titled compound

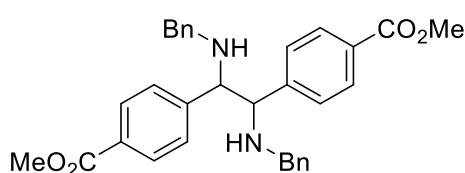

**9d** was synthesized according to the **GP-VII** by using methyl (*E*)-4-((benzylimino)methyl)benzoate **8d** (134 mg, 0.5 mmol, 1.0 equiv). The reaction was continued for 2 h. The desired product **9d** was isolated after column

chromatography on neutral activated aluminium oxide using 15% ethyl acetate in hexane as eluent (white solid, 96.5 mg, 76% yield). *meso:dl* 1:1.36. <sup>1</sup>H NMR (400 MHz, CDCl<sub>3</sub>): δ (ppm) 7.99 (d, *J* = 8.4 Hz, 5H), 7.85 (d, *J* = 8.4 Hz, 4H), 7.35 – 7.20 (m, 26H), 7.11 (d, *J* = 8.3 Hz, 4H), 7.04 (d, *J* = 7.9 Hz, 5H), 3.94 (s, 8H), 3.90 (s, 3H), 3.88 (s, 4H), 3.78 (s, 2H), 3.65 (d, *J* = 13.2 Hz, 2H), 3.58 (d, *J* = 13.6 Hz, 3H), 3.49 (d, *J* = 13.3 Hz, 2H, *meso*), 3.35 (d, *J* = 13.6 Hz, 1.36 × 2H, *dl*), 2.08 (br s, 5H).

**N1,N2-Dibenzyl-1,2-di(pyridin-3-yl)ethane-1,2-diamine (9e):**<sup>11</sup> The titled compound **9e** was

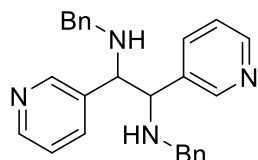

synthesized according to the **GP-VII** by using methyl (*E*)-4-((benzylimino)methyl)benzoate **8d** (98 mg, 0.5 mmol, 1.0 equiv). The reaction was continued for 2 h. The desired product **9e** was isolated after

column chromatography on neutral activated aluminium oxide using 40% ethyl acetate in hexane as eluent (white solid, 114 mg, 58% yield) *meso:dl* 1:2.86. <sup>1</sup>H NMR (400 MHz, CDCl<sub>3</sub>): δ (ppm) 8.53 – 8.51 (m, 6H), 8.40 – 8.37 (m, 7H), 8.21 (s, 1H), 7.46 – 7.39 (m, 8H), 7.29 – 7.19 (m, 34H), 7.10 – 7.08 (m, 14H), 3.88 (s, 2.86 × 2H *dl*), 3.75 (s, 2H, *meso*), 3.68 (d, *J* = 13.4 Hz, 2H, *meso*), 3.61 (d, *J* = 13.4 Hz, 2.86 × 2H *dl*), 3.51 (d, *J* = 13.2 Hz, 2H, *meso*), 3.39 (d, *J* = 13.5 Hz, 2.86 × 2H, *dl*), 2.34 (br s, 7H).



*N*<sup>1</sup>,*N*<sup>2</sup>-Bis(3-chlorophenyl)-1,2-bis(4-methoxyphenyl)ethane-1,2-diamine (**9f**):<sup>11</sup> The titled

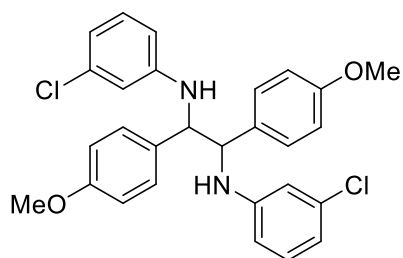

compound **9f** was synthesized according to the **GP-VII** by using (*E*)-*N*-(3-chlorophenyl)-1-(4-methoxyphenyl) methanimine **8f** (123 mg, 0.5 mmol, 1.0 equiv). The reaction was continued for 2 h. The desired product **9f** was isolated after column chromatography on neutral activated aluminium oxide using 2% ethyl acetate in hexane as eluent (gummy

liquid, 118 mg, 96% yield). *meso:dl* 1.01:1. <sup>1</sup>H NMR (400 MHz, CDCl<sub>3</sub>): δ (ppm) 7.02 – 6.96 (m, 8H), 6.86 (d, *J* = 8.3 Hz, 4H), 6.80 – 6.77 (m, 8H), 6.64 (d, *J* = 7.8 Hz, 4H), 6.51 (s, 4H), 6.38 (d, *J* = 8.2 Hz, 4H), 4.83 (d, *J* = 7.4 Hz, 1.01 × 2H, *meso*), 4.54 (d, *J* = 7.8 Hz, 1.01 × 2H, *meso* and 2H *dl*), 4.48 (br s, 2H), 3.79 (s, 1.01 × 6H, *meso*), 3.77 (s, 6H, *dl*).

*1H-Indole* (**12a**):<sup>12</sup> The titled compound **12a** was synthesized according to **GP-VIII** by using

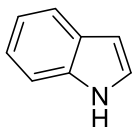

1-tosyl-1*H*-indole **10a**, **10f-10h** (0.5 mmol, 1.0 equiv). The reactions were continued for 1.5-4.5 h. The desired product **12a** was isolated after silica gel column chromatography by using 5% ethyl acetate in hexane as eluent (white solid, 85-97% yields). <sup>1</sup>H NMR (400 MHz, CDCl<sub>3</sub>): δ (ppm) 8.11 (br s, 1H), 7.74 (d, *J* = 7.8 Hz, 1H), 7.44 (d, *J* = 8.1 Hz, 1H), 7.28 (t, *J* = 7.5 Hz, 1H), 7.24 (s, 1H), 7.21 (t, *J* = 7.7 Hz, 1H), 6.63 (s, 1H).

*5-Methoxy-1H-indole* (**12b**):<sup>12</sup> The titled compound **12b** was synthesized according to **GP-**

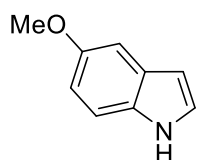

**VIII** by using 5-methoxy-1-tosyl-1*H*-indole **10b** (150 mg, 0.5 mmol, 1.0 equiv). The reaction was continued for 3 h. The desired product **12b** was isolated after silica gel column chromatography by using 5% ethyl acetate in hexane as eluent (white solid, 67.6 mg, 92% yield). <sup>1</sup>H NMR (500 MHz, CDCl<sub>3</sub>): δ (ppm) 8.02 (br s, 1H), 7.24 (d, *J* = 7.9 Hz, 1H), 7.15 (t, *J* = 2.8 Hz, 1H), 7.08 (d, *J* = 2.3 Hz, 1H), 6.84 (dd, *J* = 8.8, 2.4 Hz, 1H), 6.45 (s, 1H), 3.83 (s, 3H).

*1H-Indole-5-carbonitrile* (**12c**):<sup>12</sup> The titled compound **12c** was synthesized according to **GP-**

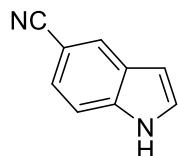

**VIII** by using 1-tosyl-1*H*-indole-5-carbonitrile **10c** (148 mg, 0.5 mmol, 1.0 equiv). The reaction was continued for 3 h. The desired product **12c** was isolated after silica gel column chromatography by using 10% ethyl acetate in hexane as eluent (yellow solid, 64 mg, 90% yield). <sup>1</sup>H NMR (400 MHz, CDCl<sub>3</sub>): δ (ppm) 8.72 (br s, 1H), 8.00 (s, 1H), 7.48 (d, *J* = 8.5 Hz, 1H), 7.42 (d, *J* = 8.5 Hz, 1H), 7.36 – 7.35 (m, 1H), 6.64 – 6.63 (m, 1H).

**4-Bromo-1H-indole (12d):**<sup>12</sup> The titled compound **12d** was synthesized according to **GP-VIII**

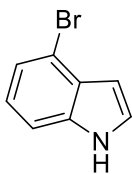

by using 4-bromo-1-tosyl-1H-indole **10d** (175 mg, 0.5 mmol, 1.0 equiv) as prototype. The reaction was continued for 4.5 h. The desired product **12d** was isolated after silica gel column chromatography by using 5% ethyl acetate in hexane as eluent (liquid, 83.3 mg, 85% yield). <sup>1</sup>H NMR (400 MHz, CDCl<sub>3</sub>): δ (ppm) 8.23 (br s, 1H), 7.35 – 7.32 (m, 2H), 7.23 (s, 1H), 7.09 (t, *J* = 7.8 Hz, 1H), 6.65 (s, 1H).

**1-(1H-Indol-3-yl)ethan-1-one (12e):**<sup>12</sup> The titled compound **12e** was synthesized according to

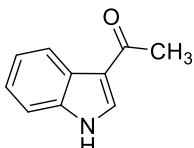

**GP-VIII** by using 1-(1-(phenylsulfonyl)-1H-indol-3-yl)ethan-1-one **10e** (149 mg, 0.5 mmol, 1.0 equiv). The reaction was continued for 2 h. The desired product **12e** was isolated after silica gel column chromatography by using 60% ethyl acetate in hexane as eluent (yellow solid, 59.5 mg, 75% yield). <sup>1</sup>H NMR (400 MHz, CDCl<sub>3</sub>): δ (ppm) 8.91 (br s, 1H), 8.42 – 8.38 (m, 1H), 7.88 – 7.87 (m, 1H), 7.44 – 7.40 (m, 1H), 7.32 – 7.27 (m, 2H), 2.56 (s, 3H).

**9H-Carbazole (12f):**<sup>12</sup> The titled compound **12f** was synthesized according to **GP-VIII** by

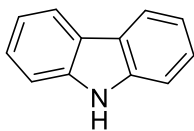

using 9-tosyl-9H-carbazole **10k** (160 mg, 0.5 mmol, 1.0 equiv). The reaction was continued for 10 h. The desired product **12f** was isolated after silica gel column chromatography by using 5% ethyl acetate in hexane as eluent (white solid, 62.7 mg, 75% yield). <sup>1</sup>H NMR (400 MHz, DMSO-*d*<sub>6</sub>): δ (ppm) 11.24 (br s, 1H), 8.11 (d, *J* = 7.5 Hz, 2H), 7.48 (d, *J* = 8.0 Hz, 2H), 7.38 (t, *J* = 7.2 Hz, 2H), 7.15 (t, *J* = 7.1 Hz, 2H).

**1H-Imidazole (12g):**<sup>12</sup> The titled compound **12g** was synthesized according to **GP-VIII** by

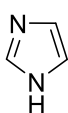

using 1-tosyl-1H-imidazole **10l** (111 mg, 0.5 mmol, 1.0 equiv). The reaction was continued for 2.5 h. The desired product **12g** was isolated after silica gel column chromatography by using DCM as eluent (white solid, 27 mg, 80% yield). <sup>1</sup>H NMR (400 MHz, CDCl<sub>3</sub>) δ (ppm) 11.17 (br s, 1H), 7.72 (s, 1H), 7.13 – 7.10 (m, 2H).

**1H-1,2,4-Triazole (12h):**<sup>12</sup> The titled compound **12h** was synthesized according to **GP-VIII**

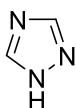

by using 1-tosyl-1H-imidazole **10m** (112 mg, 0.5 mmol, 1.0 equiv). The reaction was continued for 2.5 h. The desired product **12h** was isolated after silica gel column chromatography by using DCM as eluent (white solid, 29.3 mg, 85% yield). <sup>1</sup>H NMR (400 MHz, CDCl<sub>3</sub>) δ 8.23 (s, 2H), 5.89 (br s, 1H).

**1H-Benzo[d][1,2,3]triazole (12i):**<sup>12</sup> The titled compound **12i** was synthesized according to

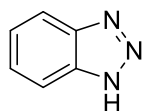

**GP-VIII** by using 1-tosyl-1H-benzo[d][1,2,3]triazole **10n** (136 mg, 0.5 mmol, 1.0 equiv). The reaction was continued for 1 h. The desired product **12i** was isolated after silica gel column chromatography by using 25% ethyl acetate in hexane as eluent (white solid, 45.2 mg, 76% yield). **<sup>1</sup>H NMR** (500 MHz, CDCl<sub>3</sub>): δ (ppm) 13.33 (br s, 1H), 7.94 (dd, *J* = 6.3, 3.0 Hz, 2H), 7.42 (d, *J* = 6.1 Hz, 2H).

**N-Benzylbenzamide (12j):**<sup>12</sup> The titled compound **12j** was synthesized according to **GP-VIII**

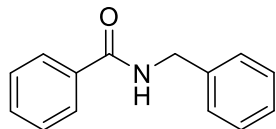

by using *N*-benzyl-*N*-tosylbenzamide **10o** (182 mg, 0.5 mmol, 1.0 equiv). The reaction was continued for 3.5 h. The desired product **12j** was isolated after silica gel column chromatography by using 15% ethyl acetate in hexane as eluent (white solid, 91.7 mg, 87% yield). **<sup>1</sup>H NMR** (400 MHz, CDCl<sub>3</sub>): δ (ppm) 7.81–7.78 (m, 2H), 7.52–7.48 (m, 1H), 7.45 – 7.40 (m, 2H), 7.36 – 7.35 (m, 4H), 7.33 – 7.28 (m, 1H), 6.47 (br s, 1H), 4.65 (d, *J* = 5.7 Hz, 2H).

**N-Benzyl-4-methylbenzenesulfonamide (12k):**<sup>12</sup> The titled compound **12k** was synthesized

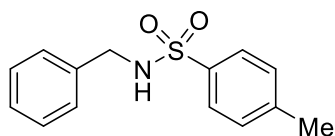

according to **GP-VIII** by using *N*-benzyl-4-methyl-*N*-tosylbenzenesulfonamide **10p** (207 mg, 0.5 mmol, 1.0 equiv). The reaction was continued for 1.5 h. The desired product **12k** was isolated after silica gel column chromatography by using 10% ethyl acetate in hexane as eluent (white solid, 116 mg, 89% yield). **<sup>1</sup>H NMR** (400 MHz, CDCl<sub>3</sub>): δ (ppm) 7.79 – 7.76 (m, 2H), 7.34 – 7.27 (m, 5H), 7.22 (s, 2H), 4.86 (br s, 1H), 4.15 – 4.12 (m, 2H), 2.45 (s, 3H).

**N-(2-Bromo-4-methylphenyl)benzamide (12l):**<sup>10c</sup> The titled compound **12l** was synthesized

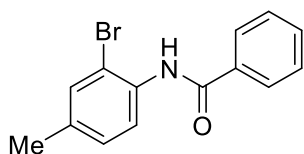

according to **GP-VIII** by using *N*-(2-bromo-4-methylphenyl)-*N*-tosylbenzamide **10q** (221 mg, 0.5 mmol, 1.0 equiv). The reaction was continued for 2 h. The desired product **12l** was isolated after silica gel column chromatography by using 5% ethyl acetate in hexane as eluent (white solid, 123 mg, 85% yield). **<sup>1</sup>H NMR** (400 MHz, CDCl<sub>3</sub>): δ (ppm) 8.40 (d, *J* = 8.5 Hz, 1H), 8.39 (br s, 1H), 7.93 (d, *J* = 7.4 Hz, 2H), 7.58 (t, *J* = 7.2 Hz, 1H), 7.52 (t, *J* = 7.3 Hz, 2H), 7.41 (s, 1H), 7.18 (d, *J* = 8.4 Hz, 1H), 2.33 (s, 3H).

**Naphthalen-2-ol (12m):**<sup>12</sup> The titled compound **12m** was synthesized according to **GP-VIII**

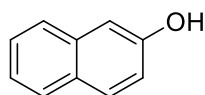

by using naphthalen-2-yl 4-methylbenzenesulfonate **10r** (149 mg, 0.5 mmol, 1.0 equiv). The reaction was continued for 12 h. The desired product **12m** was isolated after silica gel column chromatography by using 10% ethyl acetate in hexane as

eluent (white solid, 50.4 mg, 70% yield).  $^1\text{H NMR}$  (400 MHz,  $\text{CDCl}_3$ ):  $\delta$  (ppm) 7.78 (t,  $J = 8.3$  Hz, 2H), 7.69 (d,  $J = 8.2$  Hz, 1H), 7.45 (t,  $J = 7.5$  Hz, 1H), 7.35 (t,  $J = 7.5$  Hz, 1H), 7.16 (d,  $J = 1.4$  Hz, 1H), 7.12 (dd,  $J = 8.8, 2.4$  Hz, 1H), 5.23 (br s, 1H).

**Methyl  $N^2, N^6$ -bis(tert-butoxycarbonyl)- $L$ -lysyl- $L$ -tryptophanate (13a):**<sup>12</sup> The titled compound

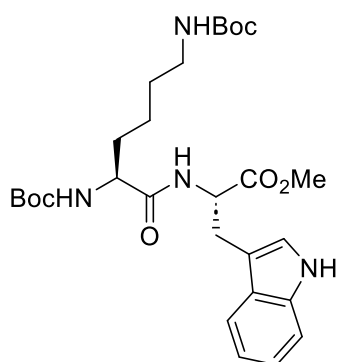

**13a** was synthesized according to **GP-IX** by using methyl  $N^a$ -( $N^2, N^6$ -bis(tert-butoxycarbonyl)- $L$ -lysyl)-1-tosyl- $L$ -tryptophanate **12a** (70 mg, 0.1 mmol, 1.0 equiv). The reaction was continued for 2 h. The desired product **11a** was isolated as after silica gel column chromatography by using 2% MeOH in DCM as eluent (yellow semiliquid, 49 mg, 90% yield).  $^1\text{H NMR}$  (500 MHz,  $\text{DMSO-}d_6$ ):  $\delta$  (ppm) 10.86 (s, 1H), 8.12 (d,  $J = 7.4$  Hz, 1H), 7.47 (d,  $J = 7.9$

Hz, 1H), 7.33 (d,  $J = 8.1$  Hz, 1H), 7.15 – 7.11 (m, 1H), 7.06 (t,  $J = 7.9$  Hz, 1H), 6.98 (t,  $J = 7.7$  Hz, 1H), 6.77 – 6.69 (m, 2H), 4.51 (dd,  $J = 13.7, 7.1$  Hz, 1H), 3.91 (dd,  $J = 13.1, 8.4$  Hz, 1H), 3.54 (s, 3H), 3.14 (dd,  $J = 14.6, 5.8$  Hz, 1H), 3.07 (dd,  $J = 14.7, 7.6$  Hz, 1H), 2.89 – 2.84 (m, 2H), 1.56 – 1.41 (m, 2H), 1.37 (s, 18H), 1.23 – 1.16 (m, 4H). **HRMS (ESI)  $m/z$ :**  $[\text{M}+\text{H}]^+$  calcd for  $\text{C}_{28}\text{H}_{43}\text{N}_4\text{O}_7$ , 547.3126; found 547.3127.

**Methyl (tert-butoxycarbonyl)- $L$ -phenylalanyl- $L$ -tryptophyl- $L$ -leucyl- $L$ -tyrosinate (13b):**<sup>12</sup>

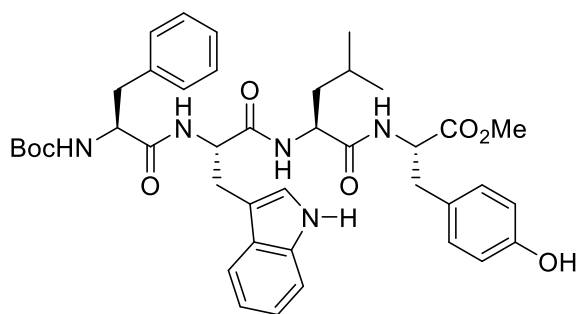

The titled compound **13b** was synthesized according to **GP-IX** by using methyl  $N^a$ -((tert-butoxycarbonyl)- $L$ -phenylalanyl)-1-tosyl- $L$ -tryptophyl- $L$ -leucyl- $L$ -tyrosinate **11b** (90 mg, 0.1 mmol, 1.0 equiv). The reaction was continued for 2 h. The desired product **13b** was isolated after silica gel column

chromatography by using 5% MeOH in DCM as eluent (white solid, 67.4 mg, 91% yield).  $^1\text{H NMR}$  (400 MHz,  $\text{DMSO-}d_6$ ):  $\delta$  (ppm) 10.80 (s, 1H), 9.25 (s, 1H), 8.23 (d,  $J = 7.0$  Hz, 1H), 8.08 (d,  $J = 8.3$  Hz, 1H), 7.95 (d,  $J = 7.7$  Hz, 1H), 7.59 (d,  $J = 7.8$  Hz, 1H), 7.31 (d,  $J = 8.1$  Hz, 1H), 7.20 – 7.11 (m, 6H), 7.05 (t,  $J = 7.5$  Hz, 1H), 6.98 (t,  $J = 7.5$  Hz, 2H), 6.96 – 6.90 (m, 2H), 6.66 (d,  $J = 7.6$  Hz, 2H), 4.60 (dd,  $J = 12.9, 7.6$  Hz, 1H), 4.41 – 4.37 (m, 2H), 4.13 – 4.07 (m, 1H), 3.54 (s, 3H), 3.11 (dd,  $J = 14.6, 4.2$  Hz, 1H), 2.97 (dd,  $J = 14.7, 8.4$  Hz, 1H), 2.91 – 2.81 (m, 3H), 2.68 – 2.62 (m, 1H), 1.58 – 1.51 (m, 1H), 1.42 – 1.38 (m, 2H), 1.27 (s, 9H), 0.86 (d,  $J = 6.2$  Hz, 3H), 0.82 (d,  $J = 6.1$  Hz, 3H). **HRMS (ESI)  $m/z$ :**  $[\text{M}+\text{H}]^+$  calcd for  $\text{C}_{41}\text{H}_{52}\text{N}_5\text{O}_8$ , 742.3810; found 742.3813.

**Methyl  $N^2,N^6$ -bis(*tert*-butoxycarbonyl)-*L*-lysyl-*L*-tyrosyl-*L*-methionyl-*D*-alloisoleucyl-*L*-tryptophyl-*L*-phenylalaninate (**13c**):<sup>12</sup>**

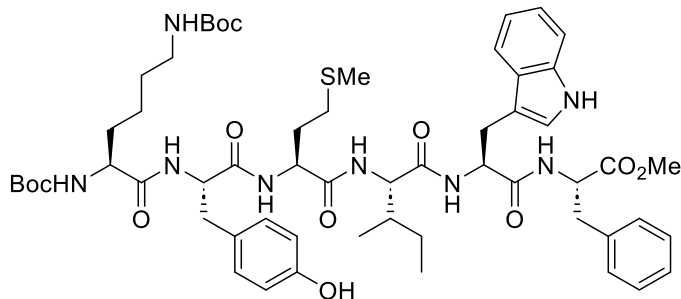

The titled compound **13c** was synthesized according to **GP-IX** by using methyl  $N^2,N^6$ -bis(*tert*-butoxycarbonyl)-*L*-lysyl-*L*-tyrosyl-*L*-methionyl-*D*-alloisoleucyl-1-tosyl-*L*-tryptophyl-*L*-phenylalaninate **11c** (125

mg, 0.5 mmol, 1.0 equiv). The reaction was continued for 2 h. The desired product **13c** was isolated after silica gel column chromatography by using 3% MeOH in DCM as eluent (99 mg, yellow foamy solid, 90% yield). <sup>1</sup>H NMR (400 MHz, DMSO-*d*<sub>6</sub>): δ (ppm) 10.79 (s, 1H), 9.13 (s, 1H), 8.41 – 8.36 (m, 1H), 8.20 – 8.10 (m, 1H), 8.00 (d, *J* = 8.2 Hz, 1H), 7.78 (d, *J* = 8.5 Hz, 1H), 7.68 – 7.61 (m, 1H), 7.54 (d, *J* = 7.8 Hz, 1H), 7.31 (d, *J* = 8.1 Hz, 1H), 7.23 (d, *J* = 6.9 Hz, 2H), 7.19 (d, *J* = 7.1 Hz, 1H), 7.15 (d, *J* = 7.5 Hz, 2H), 7.07 – 7.03 (m, 2H), 6.97 – 6.92 (m, 3H), 6.86 (t, *J* = 8.3 Hz, 1H), 6.74 – 6.73 (m, 1H), 6.59 (d, *J* = 7.4 Hz, 2H), 4.63 – 4.56 (m, 1H), 4.47 – 4.35 (m, 3H), 3.79 – 3.77 (m, 1H), 3.54 – 3.50 (m, 3H), 3.07 – 2.78 (m, 8H), 2.71 – 2.58 (m, 1H), 2.40 – 2.32 (m, 1H), 1.97 – 1.96 (m, 2H), 1.91 – 1.65 (m, 3H), 1.36 (s, 18H), 1.27 – 1.17 (m, 8H), 1.04 – 0.98 (m, 2H), 0.75 (t, *J* = 6.9 Hz, 3H), 0.71 (d, *J* = 6.6 Hz, 3H). **HRMS (ESI) *m/z***: [M+H]<sup>+</sup> calcd for C<sub>57</sub>H<sub>81</sub>N<sub>8</sub>O<sub>12</sub>S, 1101.5689; found 1101.5696.

**Methyl  $N^2,N^6$ -bis(*tert*-butoxycarbonyl)-*L*-lysyl-*L*-tyrosyl-*L*-methionyl-*L*-alloisoleucyl-*L*-tryptophyl-*L*-alloisoleucinate (**13d**):<sup>12</sup>**

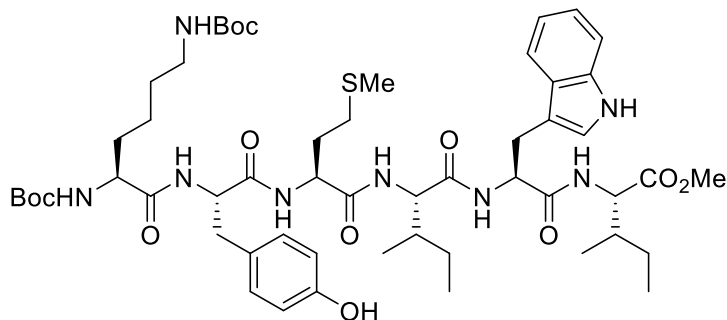

The titled compound **13d** was synthesized according to **GP-IX** by using methyl  $N^2,N^6$ -bis(*tert*-butoxycarbonyl)-*L*-lysyl-*L*-tyrosyl-*L*-methionyl-*L*-alloisoleucyl-1-tosyl-*L*-tryptophyl-

*L*-alloisoleucinate **11d** (122 mg, 0.1 mmol, 1.0 equiv). The reaction was continued for 3 h. The desired product **13d** was isolated after silica gel column chromatography by using 5% MeOH in DCM as eluent (yellow foamy solid, 95 mg, 89% yield). <sup>1</sup>H NMR (400 MHz, DMSO-*d*<sub>6</sub>): δ (ppm) 10.81 (br s, 1H), 9.11 (s, 1H), 8.32 – 8.07 (m, 3H), 7.62 (d, *J* = 7.9 Hz, 1H), 7.54 (d, *J* = 7.7 Hz, 1H), 7.30 (d, *J* = 8.1 Hz, 1H), 7.10 (s, 1H), 7.04 (t, *J* = 7.5 Hz, 1H), 6.97 – 6.92 (m, 4H), 6.86 (d, *J* = 7.5 Hz, 1H), 6.75 – 6.72 (m, 1H), 6.59 – 6.55 (m, 2H), 4.68 – 4.62 (m, 1H), 4.46 – 4.40 (m, 1H), 4.25 – 4.19 (m, 1H), 3.80 – 3.74 (m, 1H), 3.62–3.57 (m, 4H), 3.51 – 3.50

(m, 1H), 3.08 (dd,  $J = 14.9, 5.9$  Hz, 1H), 2.94 (dd,  $J = 14.3, 7.6$  Hz, 1H), 2.87 – 2.80 (m, 4H), 2.67 – 2.62 (m, 1H), 1.81 – 1.65(m, 2H), 1.36 – 1.16 (m, 34H), 0.85 – 0.75 (m, 12H). **HRMS (ESI)  $m/z$ :**  $[M+H]^+$  calcd for  $C_{54}H_{83}N_8O_{12}S$ , 1067.5846; found 1067.5874.

**(3*S*,6*S*)-3-((1*H*-Indol-3-yl)methyl)-6-benzylpiperazine-2,5-dione (13e):**<sup>12</sup> The titled

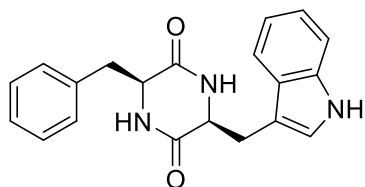

compound **13e** was synthesized according to **GP-IX** by using (3*S*,6*S*)-3-benzyl-6-((1-tosyl-1*H*-indol-3-yl)methyl)piperazine-2,5-dione **11e** (49 mg, 0.1 mmol, 1.0 equiv). The reaction was continued for 4 h. The desired product **13e** was isolated after

silica gel column chromatography by using 4% MeOH in DCM as eluent (white solid, 30 mg, 89% yield). **<sup>1</sup>H NMR** (400 MHz, DMSO-*d*<sub>6</sub>):  $\delta$  10.91 (s, 1H), 7.94 (s, 1H), 7.73 (s, 1H), 7.49 (d,  $J = 7.9$  Hz, 1H), 7.32 (d,  $J = 8.1$  Hz, 1H), 7.20 – 7.14 (m, 3H), 7.07 (t,  $J = 7.5$  Hz, 1H), 7.00 (d,  $J = 7.5$  Hz, 1H), 6.96 (s, 1H), 6.70 (d,  $J = 7.3$  Hz, 2H), 3.97 (s, 1H), 3.85 (s, 1H), 2.80 (dd,  $J = 14.4, 4.3$  Hz, 1H), 2.54 (d,  $J = 5.8$  Hz, 1H), 2.46 (dd,  $J = 13.5, 4.6$  Hz, 1H), 1.84 (dd,  $J = 13.4, 7.1$  Hz, 1H). **HRMS (ESI)  $m/z$ :**  $[M+H]^+$  calcd for  $C_{20}H_{20}N_3O_2$ , 334.1550; found 334.1555.

### Computational Studies:

All the calculations were performed with the Gaussian 16, Revision B.01 program package.<sup>16</sup> We selected the hybrid density functional B3LYP<sup>17</sup> together with Pople's 6-311+G\*\* triple- $\xi$  valence basis set,<sup>17</sup> with diffuse function on heavy atoms and polarization function on all atoms, considering the Grimme's D3 (BJ-damping) dispersion effect. The SMD solvent model<sup>18</sup> was used to simulate the implicit solvent effect. Here, acetonitrile was utilized as the solvent. In all cases, ultrafine integral grid was employed. Harmonic vibrational frequencies were computed at the same level of theory to verify the optimized geometries as minima with all real modes in the Hessian matrix. TD-DFT calculations were conducted with the optimized geometries, at the same level of theory, with  $n$  states =5 and root =1 (Figure S14).

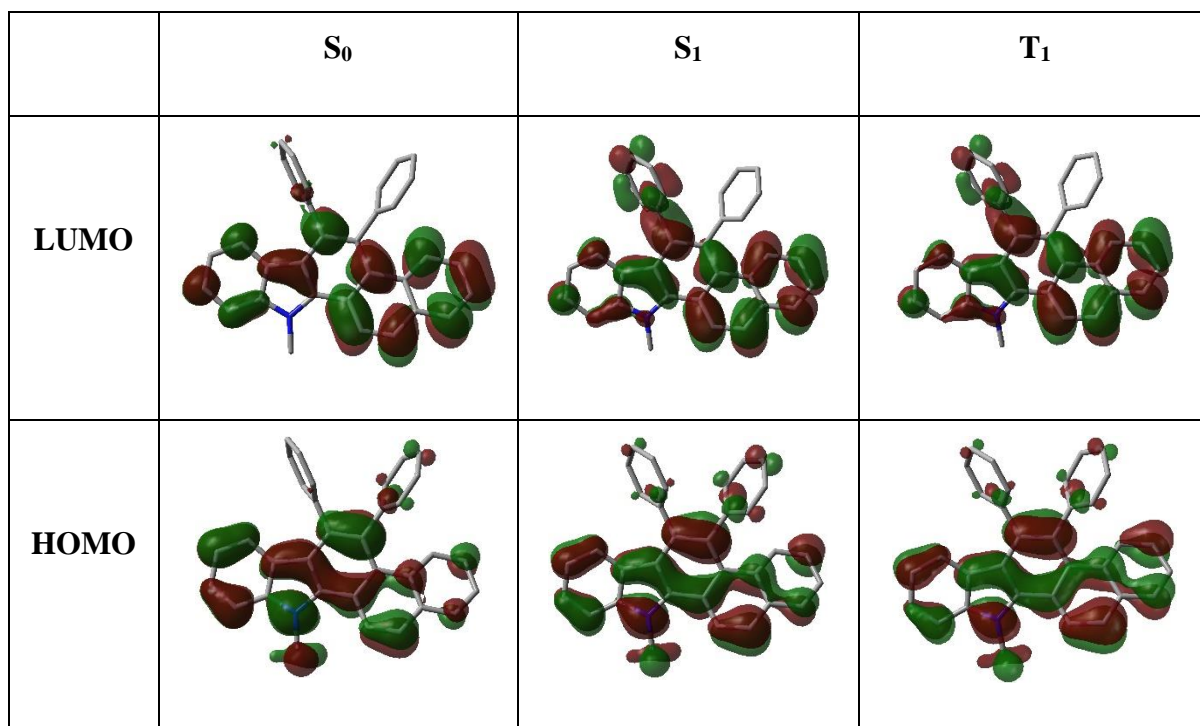

**Figure S14.** DFT (B3LYP-D3(BJ)/6-311+G\*\*/SMD( $\epsilon$ =MeCN)) optimized geometries and calculated frontier MOs for NC1 in S<sub>0</sub>, S<sub>1</sub> and T<sub>1</sub> states. HOMO (Highest Occupied Molecular Orbital); LUMO (Lowest Unoccupied Molecular Orbital); Color coding: N(blue), C(grey).

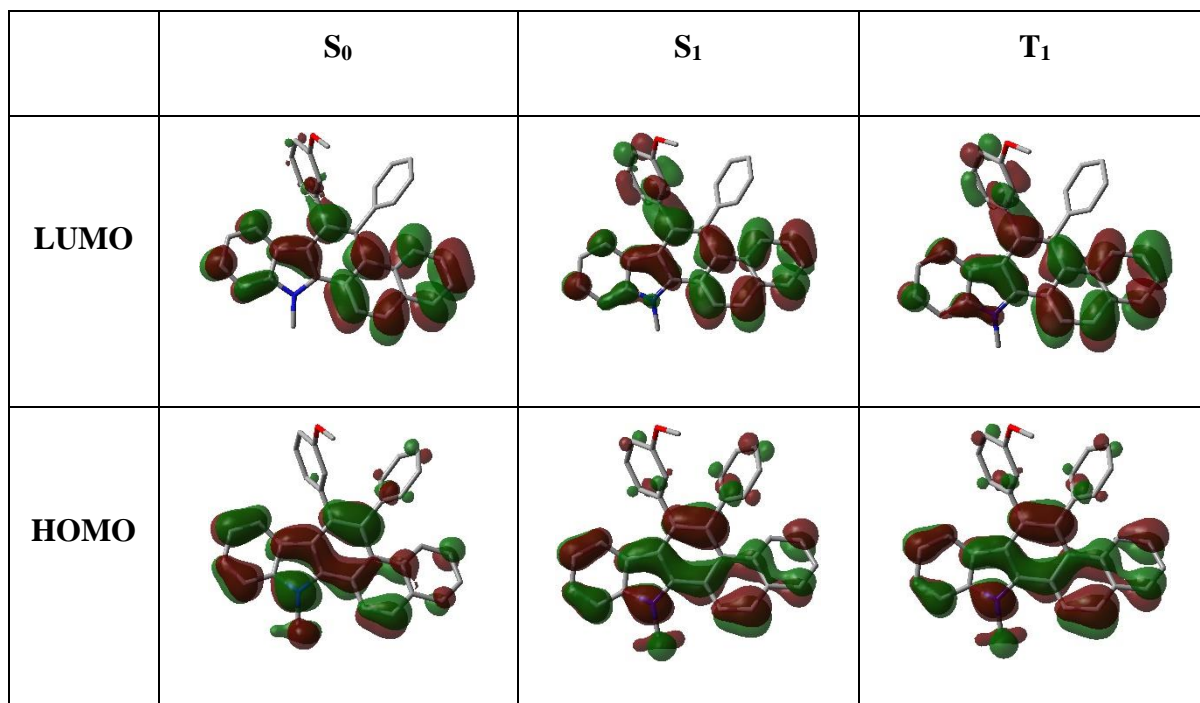

**Figure S15.** DFT (B3LYP-D3(BJ)/6-311+G\*\*/SMD( $\epsilon$ =MeCN)) optimized geometries and calculated frontier MOs for NC2 in S<sub>0</sub>, S<sub>1</sub> and T<sub>1</sub> states. HOMO (Highest Occupied Molecular Orbital); LUMO (Lowest Unoccupied Molecular Orbital); Color coding: N(blue), C(grey), O(red).

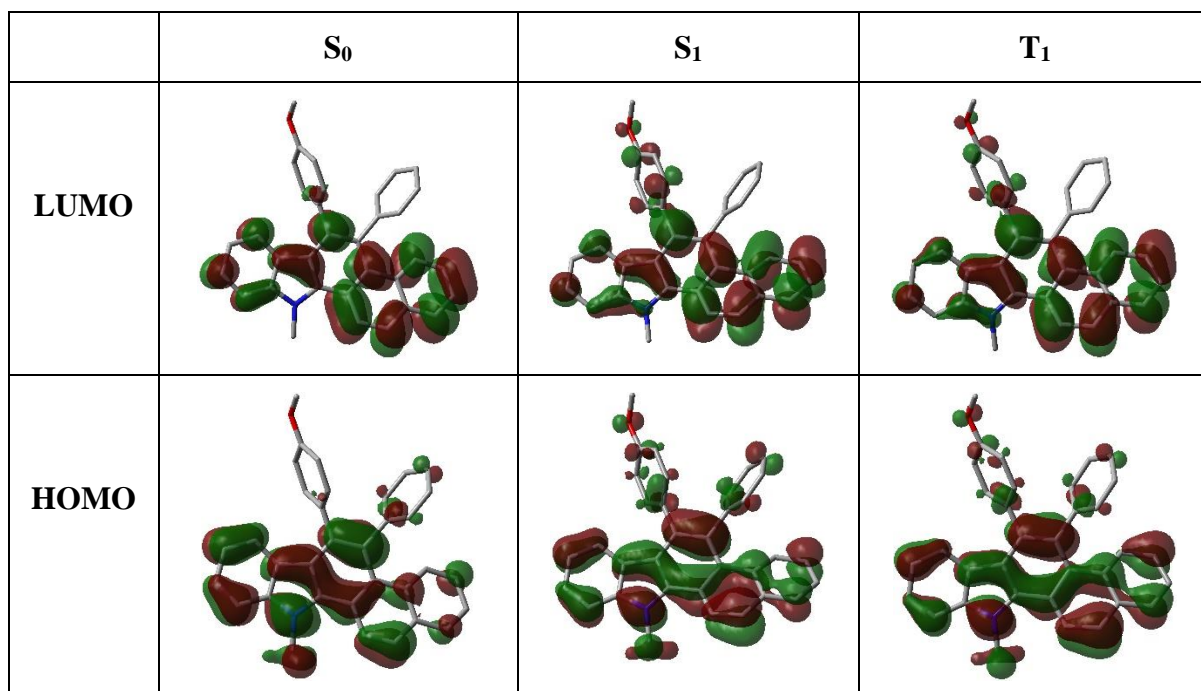

**Figure S16.** DFT (B3LYP-D3(BJ)/6-311+G\*\*/SMD( $\epsilon$ =MeCN)) optimized geometries and calculated frontier MOs for NC3 in S<sub>0</sub>, S<sub>1</sub> and T<sub>1</sub> states. HOMO (Highest Occupied Molecular Orbital); LUMO (Lowest Unoccupied Molecular Orbital); Color coding: N(blue), C(grey), O(red).

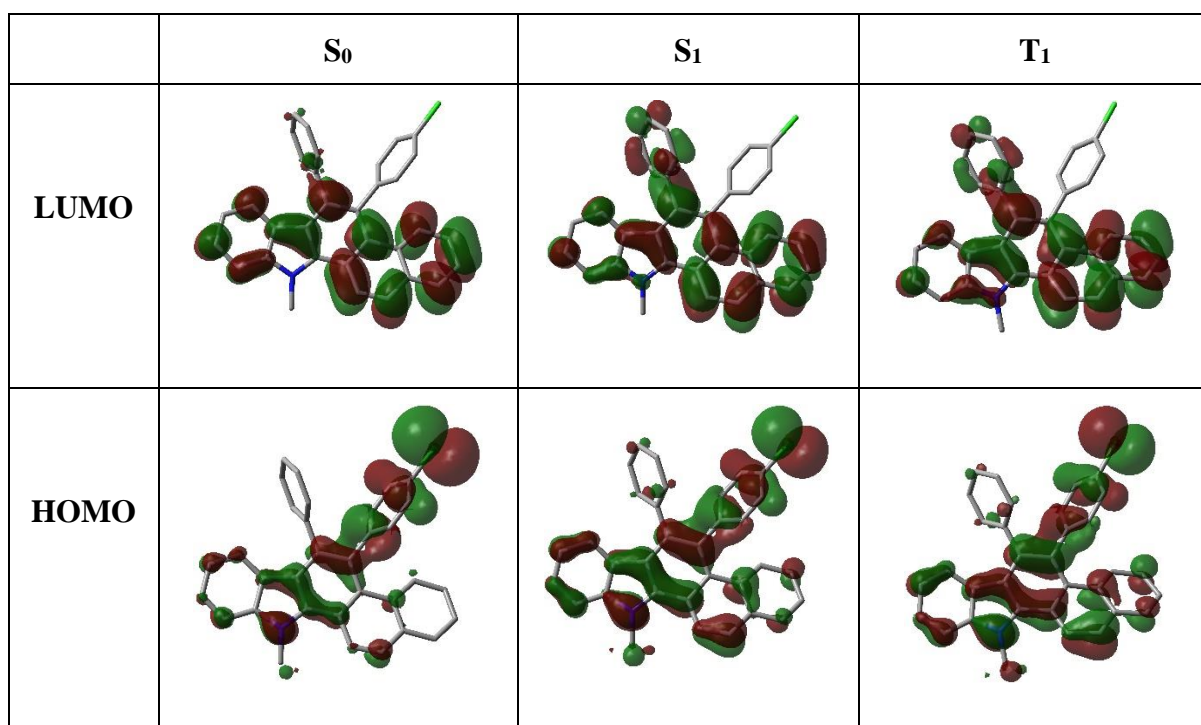

**Figure S17.** DFT (B3LYP-D3(BJ)/6-311+G\*\*/SMD( $\epsilon$ =MeCN)) optimized geometries and calculated frontier MOs for NC4 in S<sub>0</sub>, S<sub>1</sub> and T<sub>1</sub> states. HOMO (Highest Occupied Molecular Orbital); LUMO (Lowest Unoccupied Molecular Orbital); Color coding: N(blue), C(grey), Cl(green).



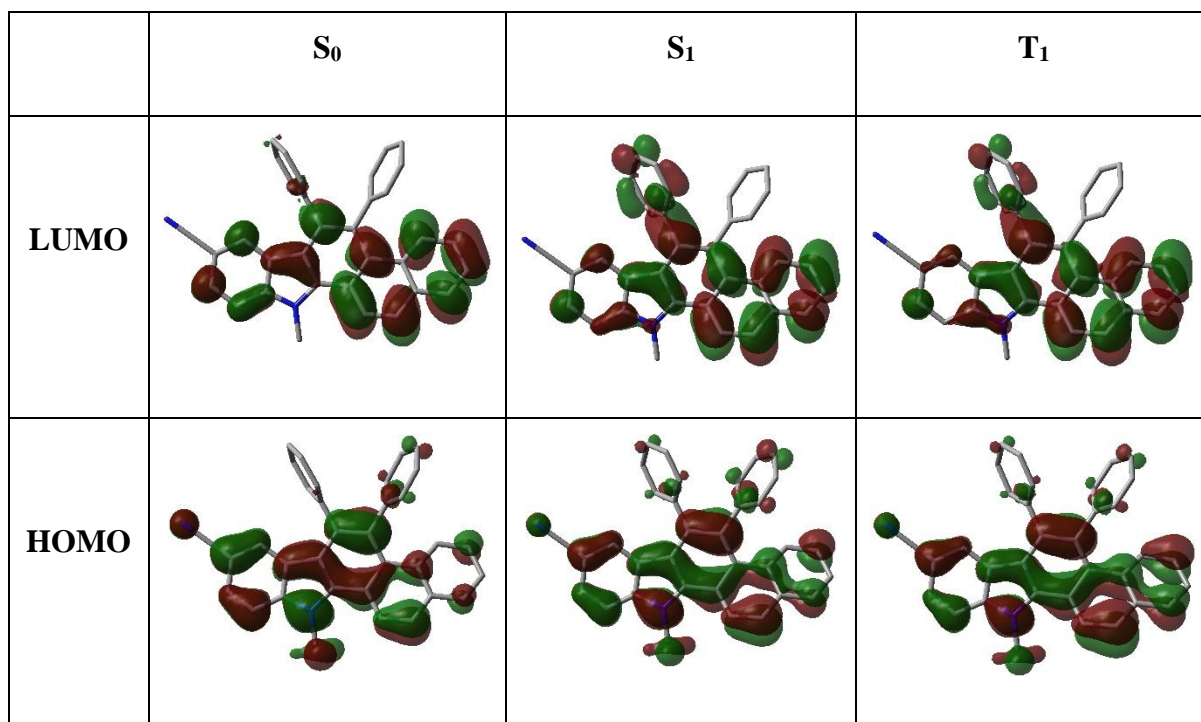

**Figure S18.** DFT (B3LYP-D3(BJ)/6-311+G\*\*/SMD( $\epsilon$ =MeCN)) optimized geometries and calculated frontier MOs for NC5 in S<sub>0</sub>, S<sub>1</sub> and T<sub>1</sub> states. HOMO (Highest Occupied Molecular Orbital); LUMO (Lowest Unoccupied Molecular Orbital); Color coding: N(blue), C(grey).

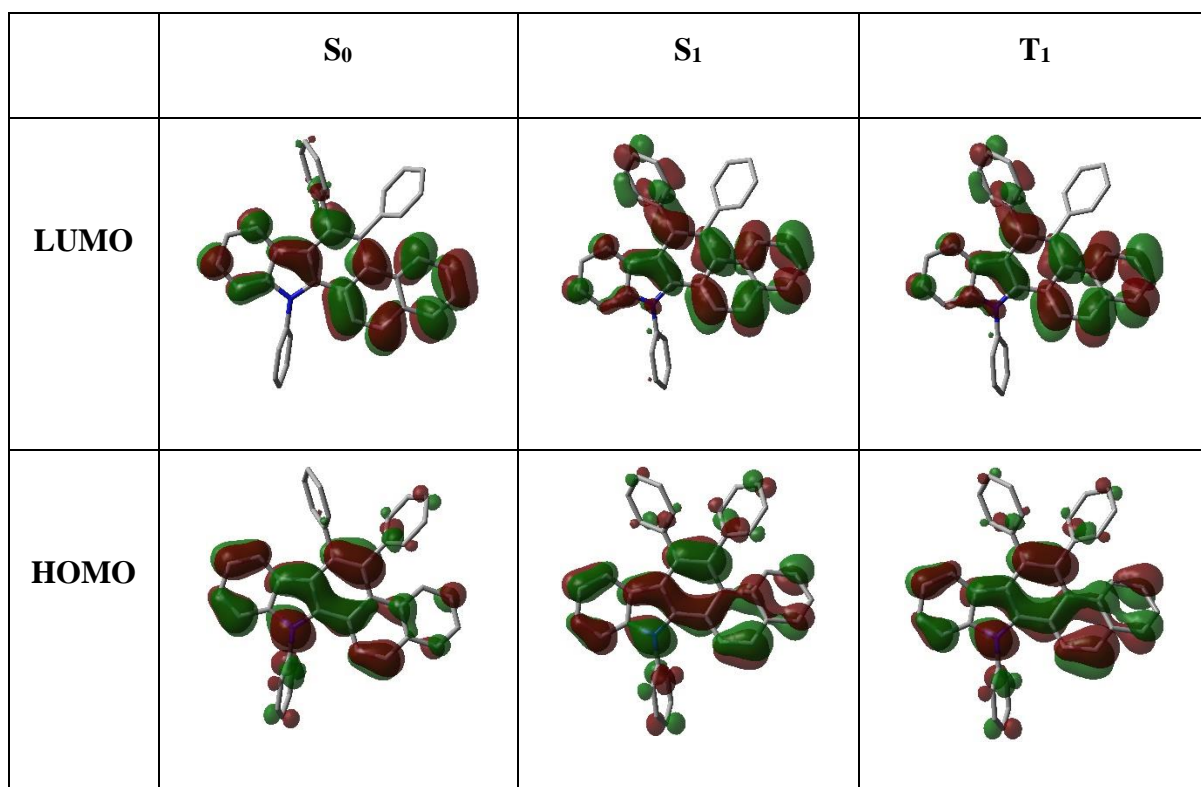

**Figure S19.** DFT (B3LYP-D3(BJ)/6-311+G\*\*/SMD( $\epsilon$ =MeCN)) optimized geometries and calculated frontier MOs for NC6 in S<sub>0</sub>, S<sub>1</sub> and T<sub>1</sub> states. HOMO (Highest Occupied Molecular Orbital); LUMO (Lowest Unoccupied Molecular Orbital); Color coding: N(blue), C(grey).

**Table S7.** Enthalpy and Gibbs free energies (in Hartree) of all the catalysts at the B3LYP-D3(BJ)/6311+G\*\*/SMD( $\epsilon$ =MeCN) level of theory.

| Structures            | <i>E</i>     | <i>G</i>     | Structures            | <i>E</i>     | <i>G</i>     |
|-----------------------|--------------|--------------|-----------------------|--------------|--------------|
| NC1 (S <sub>0</sub> ) | -1326.177785 | -1326.259784 | NC4 (S <sub>0</sub> ) | -1785.814685 | -1785.900146 |
| NC1 (S <sub>1</sub> ) | -1326.070065 | -1326.152005 | NC4 (S <sub>1</sub> ) | -1785.706897 | -1785.792242 |
| NC1 (T <sub>1</sub> ) | -1326.100888 | -1326.183653 | NC4 (T <sub>1</sub> ) | -1785.737848 | -1785.824097 |
| NC2 (S <sub>0</sub> ) | -1440.708793 | -1440.797054 | NC5 (S <sub>0</sub> ) | -1418.457123 | -1418.543515 |
| NC2 (S <sub>1</sub> ) | -1440.601364 | -1440.689304 | NC5 (S <sub>1</sub> ) | -1418.347961 | -1418.434414 |
| NC2 (T <sub>1</sub> ) | -1440.632087 | -1440.721195 | NC5 (T <sub>1</sub> ) | -1418.380004 | -1418.467238 |
| NC3 (S <sub>0</sub> ) | -1440.707928 | -1440.796246 | NC6 (S <sub>0</sub> ) | -1517.933781 | -1518.024882 |
| NC3 (S <sub>1</sub> ) | -1440.600504 | -1440.688342 | NC6 (S <sub>1</sub> ) | -1517.824193 | -1517.914589 |
| NC3 (T <sub>1</sub> ) | -1440.631177 | -1440.719932 | NC6 (T <sub>1</sub> ) | -1517.856101 | -1517.947133 |

*G* = Sum of electronic and thermal free energies.

**Table S8:** Computational spectral data from TDDFT calculations at B3LYP-D3(BJ)/6311+G\*\*/SMD( $\epsilon$ =MeCN)

| Catalyst | Transition                                  | $\Delta E(\text{eV})/\lambda(\text{nm})$ | <i>f</i> (Oscillator Strength) | Transition Character |
|----------|---------------------------------------------|------------------------------------------|--------------------------------|----------------------|
| NC1      | S <sub>0</sub> →S <sub>1</sub> (absorption) | 3.30/375.4                               | 0.15                           | HOMO → LUMO (67%)    |
| NC2      | S <sub>0</sub> →S <sub>1</sub> (absorption) | 3.30/375.9                               | 0.15                           | HOMO → LUMO (67%)    |
| NC3      | S <sub>0</sub> →S <sub>1</sub> (absorption) | 3.30/376.0                               | 0.15                           | HOMO → LUMO (67%)    |
| NC4      | S <sub>0</sub> →S <sub>1</sub> (absorption) | 3.30/375.3                               | 0.14                           | HOMO → LUMO (67%)    |
| NC5      | S <sub>0</sub> →S <sub>1</sub> (absorption) | 3.33/372.3                               | 0.08                           | HOMO → LUMO (66%)    |
| NC6      | S <sub>0</sub> →S <sub>1</sub> (absorption) | 3.37/368.2                               | 0.13                           | HOMO → LUMO (66%)    |

**Table S9.** Cartesian coordinates (Å) of the optimized structures of all the catalysts (NC1-NC6) at B3LYP-D3(BJ)/6311+G\*\*/SMD( $\epsilon$ =MeCN) level of theory.

**NC1 (S<sub>0</sub>)**

|   |             |              |              |
|---|-------------|--------------|--------------|
| N | 8.781202000 | 1.181631000  | 15.438257000 |
| C | 8.411006000 | 1.660403000  | 14.188575000 |
| C | 8.828352000 | 1.234709000  | 12.924158000 |
| H | 9.534746000 | 0.423527000  | 12.802885000 |
| C | 8.290534000 | 1.876191000  | 11.813431000 |
| H | 8.593821000 | 1.559614000  | 10.821820000 |
| C | 7.357148000 | 2.917443000  | 11.953373000 |
| H | 6.950605000 | 3.392943000  | 11.068177000 |
| C | 6.945987000 | 3.342182000  | 13.211724000 |
| H | 6.225894000 | 4.142931000  | 13.305608000 |
| C | 7.475944000 | 2.717834000  | 14.350308000 |
| C | 7.292681000 | 2.874722000  | 15.777909000 |
| C | 8.087292000 | 1.895458000  | 16.411810000 |
| C | 8.062329000 | 1.725021000  | 17.820974000 |
| C | 8.651934000 | 0.588781000  | 18.467399000 |
| H | 9.097931000 | -0.189624000 | 17.869881000 |
| C | 8.608615000 | 0.435004000  | 19.815164000 |
| H | 9.020513000 | -0.453273000 | 20.281141000 |
| C | 8.073389000 | 1.462061000  | 20.648346000 |
| C | 8.179343000 | 1.355483000  | 22.054528000 |
| H | 8.610718000 | 0.451147000  | 22.470341000 |
| C | 7.776672000 | 2.383586000  | 22.878311000 |
| H | 7.869496000 | 2.295914000  | 23.954811000 |
| C | 7.278244000 | 3.564681000  | 22.301786000 |
| H | 7.008696000 | 4.403964000  | 22.933006000 |
| C | 7.136594000 | 3.675830000  | 20.932318000 |
| C | 7.483497000 | 2.618547000  | 20.054458000 |
| C | 7.333748000 | 2.683547000  | 18.598972000 |
| C | 6.485692000 | 3.635336000  | 17.934725000 |
| C | 6.470500000 | 3.724107000  | 16.543562000 |
| C | 5.562839000 | 4.673166000  | 15.833828000 |
| C | 6.053446000 | 5.886211000  | 15.341986000 |
| H | 7.095799000 | 6.140912000  | 15.496499000 |
| C | 5.214312000 | 6.764432000  | 14.659586000 |
| H | 5.606523000 | 7.704071000  | 14.286769000 |
| C | 3.873869000 | 6.435693000  | 14.456434000 |
| H | 3.219870000 | 7.118146000  | 13.925362000 |
| C | 3.378951000 | 5.224826000  | 14.940490000 |
| H | 2.338334000 | 4.961989000  | 14.786075000 |
| C | 4.219635000 | 4.348651000  | 15.625230000 |
| C | 5.534522000 | 5.845146000  | 18.711666000 |
| C | 4.548735000 | 6.583554000  | 19.362986000 |
| H | 4.618362000 | 7.665338000  | 19.391856000 |

|   |              |              |              |
|---|--------------|--------------|--------------|
| C | 3.476568000  | 5.934958000  | 19.975833000 |
| H | 2.708417000  | 6.508877000  | 20.481822000 |
| C | 3.396999000  | 4.542783000  | 19.929401000 |
| H | 2.563593000  | 4.029942000  | 20.396743000 |
| C | 4.384768000  | 3.807190000  | 19.278973000 |
| C | 5.467954000  | 4.448572000  | 18.667842000 |
| C | 9.869449000  | 0.231804000  | 15.627311000 |
| H | 10.509416000 | 0.554305000  | 16.447610000 |
| H | 9.498226000  | -0.776535000 | 15.825810000 |
| H | 10.472594000 | 0.207872000  | 14.721745000 |
| H | 4.320225000  | 2.725553000  | 19.244422000 |
| H | 6.775025000  | 4.608981000  | 20.535946000 |
| H | 6.368726000  | 6.353055000  | 18.243568000 |
| H | 3.833463000  | 3.408916000  | 16.002839000 |

**NC1 (S<sub>1</sub>)**

|   |             |              |              |
|---|-------------|--------------|--------------|
| N | 8.876976000 | 1.286110000  | 15.442320000 |
| C | 8.531117000 | 1.734150000  | 14.160010000 |
| C | 9.012937000 | 1.300789000  | 12.934103000 |
| H | 9.775006000 | 0.535754000  | 12.858740000 |
| C | 8.459483000 | 1.873596000  | 11.781629000 |
| H | 8.811222000 | 1.554925000  | 10.807753000 |
| C | 7.450995000 | 2.838177000  | 11.880195000 |
| H | 7.025409000 | 3.258898000  | 10.976244000 |
| C | 6.977225000 | 3.273561000  | 13.120865000 |
| H | 6.197191000 | 4.019105000  | 13.165413000 |
| C | 7.524634000 | 2.728825000  | 14.289960000 |
| C | 7.281688000 | 2.885540000  | 15.712239000 |
| C | 8.104222000 | 1.925610000  | 16.370757000 |
| C | 8.029293000 | 1.686967000  | 17.785705000 |
| C | 8.498084000 | 0.536032000  | 18.420117000 |
| H | 8.937994000 | -0.266135000 | 17.847919000 |
| C | 8.365520000 | 0.369787000  | 19.804693000 |
| H | 8.699053000 | -0.551973000 | 20.268365000 |
| C | 7.926363000 | 1.430012000  | 20.625698000 |
| C | 7.981987000 | 1.342465000  | 22.044743000 |
| H | 8.282559000 | 0.400905000  | 22.492001000 |
| C | 7.698908000 | 2.441230000  | 22.839354000 |
| H | 7.751250000 | 2.358798000  | 23.919662000 |
| C | 7.382380000 | 3.667041000  | 22.242300000 |
| H | 7.207718000 | 4.544842000  | 22.853941000 |
| C | 7.284928000 | 3.766258000  | 20.849592000 |
| C | 7.476504000 | 2.655677000  | 20.015289000 |
| C | 7.289797000 | 2.676542000  | 18.556089000 |
| C | 6.414887000 | 3.563381000  | 17.889942000 |

|                            |              |              |              |                            |              |              |              |
|----------------------------|--------------|--------------|--------------|----------------------------|--------------|--------------|--------------|
| C                          | 6.401912000  | 3.694968000  | 16.457084000 | H                          | 8.892251000  | -0.287830000 | 17.824016000 |
| C                          | 5.519526000  | 4.668637000  | 15.783946000 | C                          | 8.279332000  | 0.325073000  | 19.811449000 |
| C                          | 6.073172000  | 5.704416000  | 15.011807000 | H                          | 8.581450000  | -0.612368000 | 20.263181000 |
| H                          | 7.150550000  | 5.775501000  | 14.916995000 | C                          | 7.867991000  | 1.390637000  | 20.633174000 |
| C                          | 5.260756000  | 6.648911000  | 14.393615000 | C                          | 7.915238000  | 1.291709000  | 22.050231000 |
| H                          | 5.711405000  | 7.447706000  | 13.814811000 | H                          | 8.163586000  | 0.333465000  | 22.493696000 |
| C                          | 3.871486000  | 6.575965000  | 14.523894000 | C                          | 7.684471000  | 2.401596000  | 22.852836000 |
| H                          | 3.237651000  | 7.311818000  | 14.042201000 | H                          | 7.728486000  | 2.309988000  | 23.932337000 |
| C                          | 3.307206000  | 5.547588000  | 15.281273000 | C                          | 7.428076000  | 3.638334000  | 22.260457000 |
| H                          | 2.229878000  | 5.477041000  | 15.384321000 | H                          | 7.287459000  | 4.521955000  | 22.871842000 |
| C                          | 4.119910000  | 4.607646000  | 15.907226000 | C                          | 7.333955000  | 3.744954000  | 20.859338000 |
| C                          | 5.379347000  | 5.746286000  | 18.608383000 | C                          | 7.478858000  | 2.637116000  | 20.030176000 |
| C                          | 4.435566000  | 6.456091000  | 19.343334000 | C                          | 7.292614000  | 2.679755000  | 18.557143000 |
| H                          | 4.431154000  | 7.539689000  | 19.307941000 | C                          | 6.423120000  | 3.551690000  | 17.908889000 |
| C                          | 3.494514000  | 5.777267000  | 20.119017000 | C                          | 6.385801000  | 3.653308000  | 16.462936000 |
| H                          | 2.752865000  | 6.330819000  | 20.683704000 | C                          | 5.467311000  | 4.603312000  | 15.794035000 |
| C                          | 3.510034000  | 4.382330000  | 20.160378000 | C                          | 5.975096000  | 5.697610000  | 15.080045000 |
| H                          | 2.776938000  | 3.847554000  | 20.753748000 | H                          | 7.048120000  | 5.838237000  | 15.018085000 |
| C                          | 4.467911000  | 3.673411000  | 19.443053000 | C                          | 5.119211000  | 6.609878000  | 14.468139000 |
| C                          | 5.415465000  | 4.345963000  | 18.659442000 | H                          | 5.531414000  | 7.455407000  | 13.928545000 |
| C                          | 9.968922000  | 0.351077000  | 15.679439000 | C                          | 3.736840000  | 6.439955000  | 14.552922000 |
| H                          | 10.483032000 | 0.614911000  | 16.600799000 | H                          | 3.069322000  | 7.149669000  | 14.077372000 |
| H                          | 9.598459000  | -0.674697000 | 15.743798000 | C                          | 3.219265000  | 5.351461000  | 15.256224000 |
| H                          | 10.673089000 | 0.423551000  | 14.853322000 | H                          | 2.146435000  | 5.208979000  | 15.324913000 |
| H                          | 4.484751000  | 2.590706000  | 19.480684000 | C                          | 4.076366000  | 4.444296000  | 15.874057000 |
| H                          | 7.043923000  | 4.725568000  | 20.417462000 | C                          | 5.516516000  | 5.791579000  | 18.630291000 |
| H                          | 6.106993000  | 6.277087000  | 18.007691000 | C                          | 4.593689000  | 6.561577000  | 19.333196000 |
| H                          | 3.671996000  | 3.813424000  | 16.491382000 | H                          | 4.659972000  | 7.643391000  | 19.300132000 |
| <b>NC1 (T<sub>1</sub>)</b> |              |              |              | C                          | 3.586227000  | 5.944619000  | 20.075955000 |
| N                          | 8.910498000  | 1.287347000  | 15.422314000 | H                          | 2.864507000  | 6.543908000  | 20.619517000 |
| C                          | 8.561239000  | 1.741069000  | 14.157860000 | C                          | 3.510275000  | 4.552128000  | 20.110301000 |
| C                          | 9.064475000  | 1.348530000  | 12.916407000 | H                          | 2.726427000  | 4.063862000  | 20.678678000 |
| H                          | 9.843468000  | 0.601249000  | 12.832052000 | C                          | 4.439365000  | 3.783953000  | 19.412923000 |
| C                          | 8.513239000  | 1.934042000  | 11.781158000 | C                          | 5.455666000  | 4.393993000  | 18.670068000 |
| H                          | 8.878078000  | 1.643284000  | 10.802725000 | C                          | 10.019311000 | 0.375221000  | 15.667521000 |
| C                          | 7.482261000  | 2.883982000  | 11.884883000 | H                          | 10.510248000 | 0.635490000  | 16.603010000 |
| H                          | 7.062011000  | 3.314206000  | 10.982905000 | H                          | 9.680143000  | -0.662877000 | 15.709383000 |
| C                          | 6.989954000  | 3.279641000  | 13.124172000 | H                          | 10.742823000 | 0.478328000  | 14.860360000 |
| H                          | 6.194797000  | 4.009193000  | 13.180813000 | H                          | 4.380087000  | 2.702024000  | 19.441746000 |
| C                          | 7.534029000  | 2.718197000  | 14.289051000 | H                          | 7.127397000  | 4.714401000  | 20.431322000 |
| C                          | 7.283787000  | 2.857229000  | 15.711901000 | H                          | 6.296946000  | 6.275457000  | 18.055733000 |
| C                          | 8.122413000  | 1.929686000  | 16.357391000 | H                          | 3.668372000  | 3.604909000  | 16.424210000 |
| C                          | 8.032344000  | 1.674779000  | 17.778176000 | <b>NC2 (S<sub>0</sub>)</b> |              |              |              |
| C                          | 8.451109000  | 0.515522000  | 18.394197000 | N                          | 8.856831000  | 1.191168000  | 15.423135000 |

|   |             |              |              |                            |              |              |              |
|---|-------------|--------------|--------------|----------------------------|--------------|--------------|--------------|
| C | 8.501459000 | 1.665472000  | 14.167415000 | C                          | 4.352198000  | 3.744696000  | 19.171465000 |
| C | 8.940116000 | 1.241052000  | 12.909736000 | C                          | 5.439798000  | 4.408038000  | 18.592326000 |
| H | 9.655481000 | 0.436132000  | 12.799582000 | C                          | 9.949842000  | 0.250411000  | 15.629398000 |
| C | 8.410770000 | 1.874501000  | 11.790331000 | H                          | 10.573359000 | 0.577338000  | 16.460473000 |
| H | 8.730316000 | 1.558456000  | 10.803661000 | H                          | 9.584085000  | -0.761353000 | 15.820506000 |
| C | 7.464932000 | 2.906459000  | 11.915116000 | H                          | 10.568249000 | 0.232726000  | 14.734037000 |
| H | 7.065113000 | 3.375329000  | 11.023333000 | H                          | 4.309888000  | 2.662046000  | 19.133796000 |
| C | 7.033197000 | 3.330440000  | 13.166784000 | H                          | 6.704445000  | 4.581151000  | 20.488369000 |
| H | 6.304465000 | 4.124533000  | 13.250061000 | H                          | 6.314411000  | 6.330025000  | 18.194287000 |
| C | 7.554829000 | 2.714692000  | 14.313793000 | H                          | 3.891987000  | 3.381350000  | 15.976490000 |
| C | 7.348284000 | 2.871291000  | 15.738249000 | O                          | 2.086318000  | 4.943742000  | 14.671848000 |
| C | 8.140605000 | 1.898552000  | 16.385272000 | C                          | 1.530338000  | 3.730689000  | 15.187507000 |
| C | 8.090578000 | 1.724771000  | 17.793416000 | H                          | 2.011458000  | 2.854858000  | 14.742035000 |
| C | 8.682223000 | 0.594936000  | 18.449177000 | H                          | 1.621915000  | 3.687214000  | 16.276735000 |
| H | 9.151743000 | -0.175315000 | 17.859221000 | H                          | 0.477343000  | 3.746809000  | 14.910984000 |
| C | 8.612563000 | 0.436245000  | 19.795320000 | <b>NC2 (S<sub>1</sub>)</b> |              |              |              |
| H | 9.027174000 | -0.447591000 | 20.267315000 | N                          | 9.056414000  | 1.306333000  | 15.425909000 |
| C | 8.044732000 | 1.452603000  | 20.620022000 | C                          | 8.738963000  | 1.731402000  | 14.129031000 |
| C | 8.120421000 | 1.342360000  | 22.027871000 | C                          | 9.279298000  | 1.306733000  | 12.924319000 |
| H | 8.554891000 | 0.442605000  | 22.450344000 | H                          | 10.072678000 | 0.571513000  | 12.882963000 |
| C | 7.684887000 | 2.361771000  | 22.845724000 | C                          | 8.743987000  | 1.847442000  | 11.748411000 |
| H | 7.754506000 | 2.271457000  | 23.923751000 | H                          | 9.140717000  | 1.534413000  | 10.790115000 |
| C | 7.182885000 | 3.537920000  | 22.262117000 | C                          | 7.695853000  | 2.772717000  | 11.803313000 |
| H | 6.887484000 | 4.370966000  | 22.890027000 | H                          | 7.285429000  | 3.168544000  | 10.881282000 |
| C | 7.070473000 | 3.652020000  | 20.890201000 | C                          | 7.164245000  | 3.200918000  | 13.022749000 |
| C | 7.452086000 | 2.602854000  | 20.017079000 | H                          | 6.356782000  | 3.918035000  | 13.034637000 |
| C | 7.333439000 | 2.671125000  | 18.559027000 | C                          | 7.691709000  | 2.687896000  | 14.215146000 |
| C | 6.488300000 | 3.615010000  | 17.880664000 | C                          | 7.392757000  | 2.845129000  | 15.627021000 |
| C | 6.503588000 | 3.710749000  | 16.489866000 | C                          | 8.226691000  | 1.921739000  | 16.321524000 |
| C | 5.601747000 | 4.656354000  | 15.767360000 | C                          | 8.106321000  | 1.684420000  | 17.733454000 |
| C | 6.095724000 | 5.859385000  | 15.265335000 | C                          | 8.598579000  | 0.555778000  | 18.390158000 |
| H | 7.137734000 | 6.117508000  | 15.410471000 | H                          | 9.098042000  | -0.226031000 | 17.839384000 |
| C | 5.240947000 | 6.724922000  | 14.580674000 | C                          | 8.413845000  | 0.383214000  | 19.767661000 |
| H | 5.620590000 | 7.663360000  | 14.192199000 | H                          | 8.767970000  | -0.522870000 | 20.246719000 |
| C | 3.904142000 | 6.398784000  | 14.391907000 | C                          | 7.890278000  | 1.421411000  | 20.567054000 |
| H | 3.231904000 | 7.065211000  | 13.864135000 | C                          | 7.885353000  | 1.334477000  | 21.987114000 |
| C | 3.408138000 | 5.188780000  | 14.894090000 | H                          | 8.207124000  | 0.406628000  | 22.448068000 |
| C | 4.257935000 | 4.316814000  | 15.578200000 | C                          | 7.518425000  | 2.418554000  | 22.767214000 |
| C | 5.477572000 | 5.805394000  | 18.638507000 | H                          | 7.525533000  | 2.337269000  | 23.848845000 |
| C | 4.457188000 | 6.523595000  | 19.258491000 | C                          | 7.175526000  | 3.629944000  | 22.155350000 |
| H | 4.503830000 | 7.606587000  | 19.288779000 | H                          | 6.935589000  | 4.498686000  | 22.757756000 |
| C | 3.379553000 | 5.853509000  | 19.837644000 | C                          | 7.136547000  | 3.726286000  | 20.759673000 |
| H | 2.584235000 | 6.411820000  | 20.318496000 | C                          | 7.414058000  | 2.626133000  | 19.935960000 |
| C | 3.330098000 | 4.459906000  | 19.790528000 | C                          | 7.291528000  | 2.640525000  | 18.469564000 |
| H | 2.493037000 | 3.930328000  | 20.231974000 |                            |              |              |              |

|   |              |              |              |   |             |              |              |
|---|--------------|--------------|--------------|---|-------------|--------------|--------------|
| C | 6.408642000  | 3.488802000  | 17.766228000 | C | 7.691672000 | 2.686833000  | 14.215050000 |
| C | 6.452538000  | 3.621277000  | 16.332715000 | C | 7.388415000 | 2.827811000  | 15.627790000 |
| C | 5.568206000  | 4.565568000  | 15.622945000 | C | 8.231047000 | 1.929084000  | 16.307843000 |
| C | 6.118831000  | 5.608570000  | 14.863575000 | C | 8.095360000 | 1.672899000  | 17.724548000 |
| H | 7.194776000  | 5.708762000  | 14.791396000 | C | 8.529322000 | 0.528457000  | 18.358251000 |
| C | 5.285789000  | 6.529354000  | 14.232789000 | H | 9.019117000 | -0.259509000 | 17.806712000 |
| H | 5.718790000  | 7.341720000  | 13.659521000 | C | 8.308393000 | 0.331376000  | 19.766709000 |
| C | 3.901551000  | 6.430246000  | 14.340228000 | H | 8.626181000 | -0.594607000 | 20.231167000 |
| H | 3.245918000  | 7.146533000  | 13.859270000 | C | 7.825369000 | 1.380893000  | 20.570383000 |
| C | 3.343287000  | 5.387478000  | 15.092626000 | C | 7.818714000 | 1.283333000  | 21.988166000 |
| C | 4.168122000  | 4.459179000  | 15.724295000 | H | 8.084071000 | 0.334783000  | 22.442511000 |
| C | 5.237460000  | 5.619073000  | 18.440725000 | C | 7.515584000 | 2.383765000  | 22.779179000 |
| C | 4.217790000  | 6.277607000  | 19.119695000 | H | 7.519602000 | 2.293740000  | 23.859704000 |
| H | 4.159748000  | 7.359634000  | 19.083493000 | C | 7.238182000 | 3.610783000  | 22.175335000 |
| C | 3.267999000  | 5.549493000  | 19.837963000 | H | 7.041320000 | 4.488509000  | 22.779668000 |
| H | 2.466398000  | 6.062862000  | 20.356749000 | C | 7.196677000 | 3.714144000  | 20.772062000 |
| C | 3.352427000  | 4.157189000  | 19.880358000 | C | 7.415532000 | 2.612180000  | 19.950821000 |
| H | 2.613471000  | 3.583828000  | 20.428714000 | C | 7.288791000 | 2.649519000  | 18.471588000 |
| C | 4.385456000  | 3.500212000  | 19.219908000 | C | 6.414801000 | 3.489898000  | 17.789059000 |
| C | 5.340329000  | 4.222188000  | 18.491415000 | C | 6.437382000 | 3.597466000  | 16.341332000 |
| C | 10.175241000 | 0.416535000  | 15.707942000 | C | 5.534624000 | 4.536332000  | 15.638267000 |
| H | 10.643857000 | 0.704475000  | 16.646060000 | C | 6.058706000 | 5.618033000  | 14.922355000 |
| H | 9.843613000  | -0.622960000 | 15.764297000 | H | 7.131328000 | 5.758710000  | 14.870732000 |
| H | 10.905899000 | 0.514237000  | 14.907787000 | C | 5.200501000 | 6.522278000  | 14.297072000 |
| H | 4.453546000  | 2.419454000  | 19.255821000 | H | 5.610376000 | 7.364752000  | 13.751029000 |
| H | 6.873896000  | 4.674505000  | 20.315992000 | C | 3.822079000 | 6.363505000  | 14.374165000 |
| H | 5.968969000  | 6.187737000  | 17.880585000 | H | 3.146791000 | 7.064981000  | 13.898379000 |
| H | 3.745545000  | 3.651546000  | 16.302356000 | C | 3.290907000 | 5.281280000  | 15.088457000 |
| O | 1.980553000  | 5.357085000  | 15.154491000 | C | 4.142463000 | 4.370369000  | 15.712769000 |
| C | 1.366286000  | 4.349235000  | 15.961960000 | C | 5.365787000 | 5.680413000  | 18.477624000 |
| H | 1.591604000  | 3.347221000  | 15.584377000 | C | 4.367312000 | 6.397075000  | 19.131669000 |
| H | 1.687286000  | 4.429703000  | 17.004763000 | H | 4.375656000 | 7.480975000  | 19.100947000 |
| H | 0.294312000  | 4.528968000  | 15.895225000 | C | 3.357115000 | 5.724515000  | 19.820464000 |

## NC2 (T<sub>1</sub>)

|   |              |             |              |   |              |              |              |
|---|--------------|-------------|--------------|---|--------------|--------------|--------------|
| N | 9.071436000  | 1.306665000 | 15.405411000 | H | 2.575587000  | 6.282326000  | 20.323965000 |
| C | 8.752459000  | 1.741454000 | 14.126690000 | C | 3.356551000  | 4.329941000  | 19.852898000 |
| C | 9.309833000  | 1.354911000 | 12.906688000 | H | 2.571736000  | 3.798268000  | 20.379437000 |
| H | 10.115060000 | 0.632824000 | 12.856446000 | C | 4.360720000  | 3.615482000  | 19.204405000 |
| C | 8.778139000  | 1.911851000 | 11.748084000 | C | 5.377901000  | 4.281587000  | 18.512429000 |
| H | 9.184770000  | 1.624973000 | 10.785104000 | C | 10.202248000 | 0.435154000  | 15.694551000 |
| C | 7.713061000  | 2.827371000 | 11.808574000 | H | 10.644269000 | 0.710358000  | 16.649770000 |
| H | 7.308331000  | 3.234654000 | 10.889011000 | H | 9.900348000  | -0.614917000 | 15.720854000 |
| C | 7.167643000  | 3.218169000 | 13.026956000 | H | 10.953807000 | 0.567277000  | 14.917655000 |
| H | 6.348007000  | 3.921890000 | 13.050741000 | H | 4.357429000  | 2.531805000  | 19.228103000 |
|   |              |             |              | H | 6.972702000  | 4.675261000  | 20.334008000 |
|   |              |             |              | H | 6.145402000  | 6.207495000  | 17.941257000 |

|   |             |             |              |
|---|-------------|-------------|--------------|
| H | 3.744533000 | 3.535481000 | 16.270256000 |
| O | 1.930196000 | 5.197053000 | 15.124009000 |
| C | 1.340958000 | 4.155230000 | 15.907094000 |
| H | 1.609567000 | 3.167868000 | 15.519601000 |
| H | 1.642203000 | 4.233364000 | 16.955891000 |
| H | 0.264305000 | 4.296189000 | 15.824963000 |

**NC3 (S<sub>0</sub>)**

|   |             |              |              |
|---|-------------|--------------|--------------|
| N | 8.852660000 | 1.156091000  | 15.453783000 |
| C | 8.503623000 | 1.618469000  | 14.191881000 |
| C | 8.948028000 | 1.181979000  | 12.940399000 |
| H | 9.661973000 | 0.374357000  | 12.841012000 |
| C | 8.426827000 | 1.807353000  | 11.812559000 |
| H | 8.751106000 | 1.481960000  | 10.830479000 |
| C | 7.483774000 | 2.843423000  | 11.923116000 |
| H | 7.091026000 | 3.306348000  | 11.025094000 |
| C | 7.045816000 | 3.279095000  | 13.168699000 |
| H | 6.318792000 | 4.075885000  | 13.240847000 |
| C | 7.558170000 | 2.670887000  | 14.323929000 |
| C | 7.345800000 | 2.842244000  | 15.745800000 |
| C | 8.134689000 | 1.875646000  | 16.405683000 |
| C | 8.081607000 | 1.719300000  | 17.815586000 |
| C | 8.665466000 | 0.594142000  | 18.486191000 |
| H | 9.128689000 | -0.187486000 | 17.906156000 |
| C | 8.595525000 | 0.454282000  | 19.834415000 |
| H | 9.003594000 | -0.426113000 | 20.318416000 |
| C | 8.036657000 | 1.486714000  | 20.645265000 |
| C | 8.114713000 | 1.396386000  | 22.054407000 |
| H | 8.543168000 | 0.499466000  | 22.488889000 |
| C | 7.689316000 | 2.431014000  | 22.858397000 |
| H | 7.760840000 | 2.355878000  | 23.937469000 |
| C | 7.195518000 | 3.602551000  | 22.258793000 |
| H | 6.908535000 | 4.447157000  | 22.875067000 |
| C | 7.080505000 | 3.697387000  | 20.885607000 |
| C | 7.451279000 | 2.632551000  | 20.026833000 |
| C | 7.329772000 | 2.680430000  | 18.567970000 |
| C | 6.488548000 | 3.618431000  | 17.876273000 |
| C | 6.500045000 | 3.693515000  | 16.483577000 |
| C | 5.600266000 | 4.628273000  | 15.747290000 |
| C | 6.088532000 | 5.837322000  | 15.237026000 |
| H | 7.128867000 | 6.100779000  | 15.390581000 |
| C | 5.261341000 | 6.705986000  | 14.540171000 |
| H | 5.640939000 | 7.643655000  | 14.150997000 |
| C | 3.915404000 | 6.378399000  | 14.331552000 |
| C | 3.414151000 | 5.172277000  | 14.828274000 |

|   |              |              |              |
|---|--------------|--------------|--------------|
| H | 2.379844000  | 4.894191000  | 14.679927000 |
| C | 4.260944000  | 4.312281000  | 15.530034000 |
| C | 5.505397000  | 5.829897000  | 18.606082000 |
| C | 4.501981000  | 6.569010000  | 19.228831000 |
| H | 4.562028000  | 7.651683000  | 19.243331000 |
| C | 3.424161000  | 5.920028000  | 19.831605000 |
| H | 2.642321000  | 6.494488000  | 20.315550000 |
| C | 3.356986000  | 4.526792000  | 19.803385000 |
| H | 2.519577000  | 4.013424000  | 20.262981000 |
| C | 4.362533000  | 3.790564000  | 19.181231000 |
| C | 5.451258000  | 4.432288000  | 18.580603000 |
| C | 9.942452000  | 0.215017000  | 15.674725000 |
| H | 10.561409000 | 0.547886000  | 16.506845000 |
| H | 9.573518000  | -0.794325000 | 15.872643000 |
| H | 10.566476000 | 0.188271000  | 14.783472000 |
| H | 4.307250000  | 2.708036000  | 19.160575000 |
| H | 6.721182000  | 4.623606000  | 20.471228000 |
| H | 6.343202000  | 6.338297000  | 18.144923000 |
| H | 3.862193000  | 3.381040000  | 15.915659000 |
| O | 3.176630000  | 7.290272000  | 13.638728000 |
| C | 1.794825000  | 7.002754000  | 13.408842000 |
| H | 1.674004000  | 6.090529000  | 12.816938000 |
| H | 1.249805000  | 6.904122000  | 14.352395000 |
| H | 1.404304000  | 7.852170000  | 12.850557000 |

**NC3 (S<sub>1</sub>)**

|   |             |              |              |
|---|-------------|--------------|--------------|
| N | 9.001226000 | 1.251786000  | 15.468195000 |
| C | 8.675038000 | 1.656408000  | 14.168807000 |
| C | 9.197976000 | 1.205457000  | 12.964754000 |
| H | 9.982608000 | 0.460574000  | 12.927863000 |
| C | 8.657252000 | 1.731790000  | 11.786071000 |
| H | 9.040372000 | 1.397992000  | 10.829192000 |
| C | 7.619001000 | 2.669929000  | 11.835236000 |
| H | 7.203492000 | 3.053824000  | 10.910395000 |
| C | 7.104795000 | 3.124409000  | 13.051622000 |
| H | 6.303566000 | 3.848712000  | 13.057378000 |
| C | 7.639012000 | 2.626911000  | 14.248249000 |
| C | 7.358158000 | 2.814159000  | 15.659559000 |
| C | 8.188989000 | 1.897504000  | 16.361443000 |
| C | 8.079893000 | 1.688219000  | 17.779273000 |
| C | 8.559510000 | 0.564600000  | 18.452539000 |
| H | 9.040140000 | -0.236250000 | 17.912246000 |
| C | 8.385291000 | 0.423101000  | 19.836398000 |
| H | 8.727775000 | -0.480045000 | 20.329550000 |
| C | 7.893114000 | 1.486853000  | 20.621413000 |

|                            |              |              |              |   |              |              |              |
|----------------------------|--------------|--------------|--------------|---|--------------|--------------|--------------|
| C                          | 7.902308000  | 1.429337000  | 22.043519000 | C | 8.702949000  | 1.666061000  | 14.167686000 |
| H                          | 8.206670000  | 0.503709000  | 22.520581000 | C | 9.247056000  | 1.254477000  | 12.949746000 |
| C                          | 7.570108000  | 2.538631000  | 22.805040000 | H | 10.040342000 | 0.518938000  | 12.904530000 |
| H                          | 7.587783000  | 2.478930000  | 23.888065000 | C | 8.718551000  | 1.805064000  | 11.786616000 |
| C                          | 7.248294000  | 3.744636000  | 22.172983000 | H | 9.115412000  | 1.498826000  | 10.825510000 |
| H                          | 7.034673000  | 4.630806000  | 22.759727000 | C | 7.669350000  | 2.739299000  | 11.840045000 |
| C                          | 7.194008000  | 3.812368000  | 20.774554000 | H | 7.267300000  | 3.141648000  | 10.917142000 |
| C                          | 7.435364000  | 2.689254000  | 19.971622000 | C | 7.136524000  | 3.154553000  | 13.055916000 |
| C                          | 7.291299000  | 2.673420000  | 18.506774000 | H | 6.327978000  | 3.871299000  | 13.073768000 |
| C                          | 6.411540000  | 3.519647000  | 17.796500000 | C | 7.657261000  | 2.629265000  | 14.248207000 |
| C                          | 6.432652000  | 3.614766000  | 16.360450000 | C | 7.364652000  | 2.795868000  | 15.659768000 |
| C                          | 5.550464000  | 4.554594000  | 15.645992000 | C | 8.198599000  | 1.896626000  | 16.348941000 |
| C                          | 6.099612000  | 5.578300000  | 14.849849000 | C | 8.069020000  | 1.668192000  | 17.770755000 |
| H                          | 7.176456000  | 5.660619000  | 14.760533000 | C | 8.488405000  | 0.528665000  | 18.422779000 |
| C                          | 5.295218000  | 6.501452000  | 14.205180000 | H | 8.961572000  | -0.277374000 | 17.882952000 |
| H                          | 5.728930000  | 7.297774000  | 13.611347000 | C | 8.274581000  | 0.363103000  | 19.837139000 |
| C                          | 3.898816000  | 6.423983000  | 14.322966000 | H | 8.577847000  | -0.559875000 | 20.317133000 |
| C                          | 3.328540000  | 5.408368000  | 15.097575000 | C | 7.819865000  | 1.437184000  | 20.624329000 |
| H                          | 2.255621000  | 5.319234000  | 15.198364000 | C | 7.822861000  | 1.366563000  | 22.043900000 |
| C                          | 4.152488000  | 4.495694000  | 15.750984000 | H | 8.071137000  | 0.421111000  | 22.514113000 |
| C                          | 5.305265000  | 5.695217000  | 18.430025000 | C | 7.550122000  | 2.488198000  | 22.816388000 |
| C                          | 4.324025000  | 6.400544000  | 19.118820000 | H | 7.561017000  | 2.418275000  | 23.898383000 |
| H                          | 4.293767000  | 7.482312000  | 19.052975000 | C | 7.294285000  | 3.709164000  | 22.191669000 |
| C                          | 3.378546000  | 5.719147000  | 19.886685000 | H | 7.121212000  | 4.602314000  | 22.780496000 |
| H                          | 2.607703000  | 6.268502000  | 20.415231000 | C | 7.242745000  | 3.786693000  | 20.786498000 |
| C                          | 3.427530000  | 4.326525000  | 19.967182000 | C | 7.430334000  | 2.665175000  | 19.984605000 |
| H                          | 2.691558000  | 3.789542000  | 20.555001000 | C | 7.288790000  | 2.675242000  | 18.505942000 |
| C                          | 4.422470000  | 3.623131000  | 19.296470000 | C | 6.424960000  | 3.519200000  | 17.813814000 |
| C                          | 5.374317000  | 4.297779000  | 18.519630000 | C | 6.429729000  | 3.593066000  | 16.365196000 |
| C                          | 10.111784000 | 0.353642000  | 15.756695000 | C | 5.527116000  | 4.522886000  | 15.652112000 |
| H                          | 10.594594000 | 0.654549000  | 16.683571000 | C | 6.045857000  | 5.602011000  | 14.917756000 |
| H                          | 9.769269000  | -0.680691000 | 15.837747000 | H | 7.119462000  | 5.740685000  | 14.863052000 |
| H                          | 10.835374000 | 0.425946000  | 14.947335000 | C | 5.212308000  | 6.507311000  | 14.279770000 |
| H                          | 4.464680000  | 2.542597000  | 19.364331000 | H | 5.621155000  | 7.345126000  | 13.726755000 |
| H                          | 6.946070000  | 4.756602000  | 20.313929000 | C | 3.821283000  | 6.353459000  | 14.350909000 |
| H                          | 6.036462000  | 6.227843000  | 17.835346000 | C | 3.283052000  | 5.280206000  | 15.067231000 |
| H                          | 3.696026000  | 3.715950000  | 16.347554000 | H | 2.213889000  | 5.133090000  | 15.133382000 |
| O                          | 3.188611000  | 7.371799000  | 13.654174000 | C | 4.136699000  | 4.384999000  | 15.710597000 |
| C                          | 1.761914000  | 7.347916000  | 13.760509000 | C | 5.457377000  | 5.756736000  | 18.462220000 |
| H                          | 1.352773000  | 6.413975000  | 13.364326000 | C | 4.500246000  | 6.523335000  | 19.121354000 |
| H                          | 1.442585000  | 7.479903000  | 14.798517000 | H | 4.546850000  | 7.605302000  | 19.066273000 |
| H                          | 1.406467000  | 8.184172000  | 13.160734000 | C | 3.483138000  | 5.902759000  | 19.848029000 |
| <b>NC3 (T<sub>1</sub>)</b> |              |              |              | H | 2.734480000  | 6.499280000  | 20.357130000 |
| N                          | 9.022981000  | 1.245612000  | 15.450680000 | C | 3.432873000  | 4.510161000  | 19.910824000 |
|                            |              |              |              | H | 2.642312000  | 4.018778000  | 20.467120000 |



|   |              |              |              |
|---|--------------|--------------|--------------|
| C | 4.396197000  | 3.745629000  | 19.256997000 |
| C | 5.421750000  | 4.359189000  | 18.530025000 |
| C | 10.140172000 | 0.359147000  | 15.746958000 |
| H | 10.597223000 | 0.645783000  | 16.691807000 |
| H | 9.819364000  | -0.684401000 | 15.798264000 |
| H | 10.886259000 | 0.460965000  | 14.960272000 |
| H | 4.356311000  | 2.663601000  | 19.307522000 |
| H | 7.034933000  | 4.744000000  | 20.332476000 |
| H | 6.244441000  | 6.243477000  | 17.899313000 |
| H | 3.706056000  | 3.563650000  | 16.270469000 |
| O | 3.079911000  | 7.291128000  | 13.697870000 |
| C | 1.654756000  | 7.194204000  | 13.770011000 |
| H | 1.299139000  | 6.258965000  | 13.327627000 |
| H | 1.306594000  | 7.268121000  | 14.804662000 |
| H | 1.271194000  | 8.036341000  | 13.196139000 |

#### NC4 (S<sub>0</sub>)

|   |             |              |              |
|---|-------------|--------------|--------------|
| N | 8.784534000 | 1.180796000  | 15.438222000 |
| C | 8.414626000 | 1.658856000  | 14.187996000 |
| C | 8.832010000 | 1.232208000  | 12.923953000 |
| H | 9.538341000 | 0.420906000  | 12.803232000 |
| C | 8.294297000 | 1.873063000  | 11.812838000 |
| H | 8.597568000 | 1.555809000  | 10.821446000 |
| C | 7.361034000 | 2.914541000  | 11.952012000 |
| H | 6.954581000 | 3.389444000  | 11.066467000 |
| C | 6.950029000 | 3.340332000  | 13.210008000 |
| H | 6.230056000 | 4.141246000  | 13.303478000 |
| C | 7.479905000 | 2.716551000  | 14.348890000 |
| C | 7.296724000 | 2.874520000  | 15.776269000 |
| C | 8.090984000 | 1.895034000  | 16.411077000 |
| C | 8.065441000 | 1.724472000  | 17.820408000 |
| C | 8.653676000 | 0.588263000  | 18.468100000 |
| H | 9.100972000 | -0.190232000 | 17.871707000 |
| C | 8.607077000 | 0.434479000  | 19.815850000 |
| H | 9.017410000 | -0.454095000 | 20.282603000 |
| C | 8.070837000 | 1.461708000  | 20.648193000 |
| C | 8.172590000 | 1.354953000  | 22.054648000 |
| H | 8.601036000 | 0.449842000  | 22.471752000 |
| C | 7.769596000 | 2.383923000  | 22.877234000 |
| H | 7.858957000 | 2.295976000  | 23.953987000 |
| C | 7.276112000 | 3.566522000  | 22.299515000 |
| H | 7.007648000 | 4.406726000  | 22.929964000 |
| C | 7.139020000 | 3.678059000  | 20.929670000 |
| C | 7.484641000 | 2.619316000  | 20.053114000 |
| C | 7.337009000 | 2.683233000  | 18.597726000 |

|    |              |              |              |
|----|--------------|--------------|--------------|
| C  | 6.490205000  | 3.634423000  | 17.932206000 |
| C  | 6.474392000  | 3.724000000  | 16.541018000 |
| C  | 5.565062000  | 4.674036000  | 15.834900000 |
| C  | 6.056467000  | 5.883881000  | 15.336093000 |
| H  | 7.102155000  | 6.132692000  | 15.477188000 |
| C  | 5.213228000  | 6.767240000  | 14.665449000 |
| H  | 5.605830000  | 7.704668000  | 14.287572000 |
| C  | 3.868049000  | 6.446845000  | 14.481398000 |
| C  | 3.372553000  | 5.238695000  | 14.971684000 |
| H  | 2.328245000  | 4.982403000  | 14.831986000 |
| C  | 4.217222000  | 4.357375000  | 15.644600000 |
| C  | 5.528146000  | 5.842535000  | 18.696807000 |
| C  | 4.542271000  | 6.587773000  | 19.337808000 |
| H  | 4.597704000  | 7.668664000  | 19.361581000 |
| C  | 3.487267000  | 5.918283000  | 19.946256000 |
| C  | 3.396060000  | 4.531256000  | 19.925790000 |
| H  | 2.563298000  | 4.025943000  | 20.398191000 |
| C  | 4.392572000  | 3.804869000  | 19.280730000 |
| C  | 5.471442000  | 4.446046000  | 18.663736000 |
| C  | 9.871347000  | 0.229330000  | 15.628005000 |
| H  | 10.511638000 | 0.551439000  | 16.448175000 |
| H  | 9.498299000  | -0.778208000 | 15.827008000 |
| H  | 10.474490000 | 0.203998000  | 14.722503000 |
| H  | 4.328825000  | 2.723452000  | 19.257885000 |
| H  | 6.783183000  | 4.613192000  | 20.532836000 |
| H  | 6.356663000  | 6.357137000  | 18.227259000 |
| H  | 3.830342000  | 3.420491000  | 16.028491000 |
| H  | 3.210707000  | 7.133725000  | 13.960276000 |
| Cl | 2.227083000  | 6.853471000  | 20.760667000 |

#### NC4 (S<sub>1</sub>)

|   |             |             |              |
|---|-------------|-------------|--------------|
| N | 8.881845000 | 1.287594000 | 15.442262000 |
| C | 8.538794000 | 1.735897000 | 14.159664000 |
| C | 9.025102000 | 1.304653000 | 12.934581000 |
| H | 9.789148000 | 0.541441000 | 12.860778000 |
| C | 8.473700000 | 1.877182000 | 11.781287000 |
| H | 8.828855000 | 1.560161000 | 10.808122000 |
| C | 7.462830000 | 2.839555000 | 11.877755000 |
| H | 7.038954000 | 3.260146000 | 10.972964000 |
| C | 6.984661000 | 3.272898000 | 13.117469000 |
| H | 6.202903000 | 4.016755000 | 13.160339000 |
| C | 7.529911000 | 2.728452000 | 14.287442000 |
| C | 7.282764000 | 2.883780000 | 15.709291000 |
| C | 8.105574000 | 1.925279000 | 16.369100000 |
| C | 8.027936000 | 1.685164000 | 17.783952000 |

|                            |              |              |              |   |             |              |              |
|----------------------------|--------------|--------------|--------------|---|-------------|--------------|--------------|
| C                          | 8.493221000  | 0.533586000  | 18.419292000 | N | 8.913112000 | 1.286541000  | 15.422173000 |
| H                          | 8.934544000  | -0.268588000 | 17.848161000 | C | 8.565249000 | 1.740309000  | 14.157292000 |
| C                          | 8.354683000  | 0.366229000  | 19.803592000 | C | 9.069752000 | 1.347736000  | 12.916372000 |
| H                          | 8.684722000  | -0.556612000 | 20.267567000 | H | 9.848571000 | 0.600197000  | 12.832778000 |
| C                          | 7.914426000  | 1.426267000  | 20.623753000 | C | 8.519980000 | 1.933659000  | 11.780663000 |
| C                          | 7.963302000  | 1.337829000  | 22.043179000 | H | 8.885789000 | 1.642932000  | 10.802589000 |
| H                          | 8.257528000  | 0.394763000  | 22.491446000 | C | 7.489295000 | 2.884044000  | 11.883335000 |
| C                          | 7.681571000  | 2.437422000  | 22.836724000 | H | 7.070329000 | 3.314602000  | 10.980930000 |
| H                          | 7.728217000  | 2.354153000  | 23.917213000 | C | 6.995691000 | 3.279692000  | 13.122082000 |
| C                          | 7.374422000  | 3.665510000  | 22.239089000 | H | 6.200740000 | 4.009543000  | 13.177963000 |
| H                          | 7.202282000  | 4.544022000  | 22.850388000 | C | 7.538236000 | 2.717697000  | 14.287368000 |
| C                          | 7.283904000  | 3.765701000  | 20.845972000 | C | 7.286460000 | 2.856702000  | 15.709847000 |
| C                          | 7.471837000  | 2.654128000  | 20.012767000 | C | 8.124473000 | 1.929017000  | 16.356380000 |
| C                          | 7.287380000  | 2.674746000  | 18.553034000 | C | 8.033334000 | 1.674067000  | 17.777100000 |
| C                          | 6.414149000  | 3.560362000  | 17.885651000 | C | 8.450201000 | 0.515111000  | 18.394938000 |
| C                          | 6.399695000  | 3.691142000  | 16.452411000 | H | 8.891870000 | -0.289095000 | 17.826372000 |
| C                          | 5.513667000  | 4.662532000  | 15.781401000 | C | 8.274821000 | 0.325690000  | 19.812068000 |
| C                          | 6.062203000  | 5.699371000  | 15.006797000 | H | 8.574713000 | -0.611967000 | 20.264788000 |
| H                          | 7.138922000  | 5.771127000  | 14.905513000 | C | 7.862560000 | 1.391849000  | 20.632540000 |
| C                          | 5.245609000  | 6.644539000  | 14.395326000 | C | 7.905153000 | 1.293856000  | 22.049731000 |
| H                          | 5.692369000  | 7.444147000  | 13.814653000 | H | 8.149962000 | 0.335469000  | 22.494802000 |
| C                          | 3.857205000  | 6.571908000  | 14.535358000 | C | 7.673903000 | 2.404942000  | 22.850771000 |
| C                          | 3.297852000  | 5.542573000  | 15.294983000 | H | 7.713861000 | 2.313867000  | 23.930458000 |
| H                          | 2.221266000  | 5.472157000  | 15.405548000 | C | 7.422849000 | 3.641993000  | 22.256997000 |
| C                          | 4.114670000  | 4.601495000  | 15.913748000 | H | 7.282844000 | 4.526460000  | 22.867282000 |
| C                          | 5.381098000  | 5.746529000  | 18.594122000 | C | 7.334023000 | 3.747907000  | 20.855359000 |
| C                          | 4.446109000  | 6.469664000  | 19.325045000 | C | 7.477662000 | 2.638726000  | 20.027933000 |
| H                          | 4.434390000  | 7.551252000  | 19.285874000 | C | 7.293349000 | 2.679343000  | 18.554974000 |
| C                          | 3.523701000  | 5.778230000  | 20.103378000 | C | 6.424516000 | 3.550173000  | 17.904916000 |
| C                          | 3.520146000  | 4.388855000  | 20.169985000 | C | 6.387100000 | 3.652300000  | 16.459537000 |
| H                          | 2.788555000  | 3.866959000  | 20.773390000 | C | 5.466547000 | 4.601726000  | 15.792795000 |
| C                          | 4.476240000  | 3.683064000  | 19.449328000 | C | 5.971695000 | 5.696404000  | 15.077453000 |
| C                          | 5.419336000  | 4.347587000  | 18.655339000 | H | 7.044500000 | 5.835773000  | 15.009426000 |
| C                          | 9.974040000  | 0.353526000  | 15.682266000 | C | 5.113303000 | 6.611222000  | 14.472939000 |
| H                          | 10.484472000 | 0.616998000  | 16.605768000 | H | 5.523374000 | 7.457170000  | 13.932408000 |
| H                          | 9.604208000  | -0.672619000 | 15.744332000 | C | 3.731205000 | 6.443837000  | 14.566975000 |
| H                          | 10.681048000 | 0.427595000  | 14.858737000 | C | 3.216217000 | 5.354801000  | 15.271291000 |
| H                          | 4.487584000  | 2.601259000  | 19.498614000 | H | 2.143614000 | 5.214327000  | 15.347150000 |
| H                          | 7.051738000  | 4.727037000  | 20.413404000 | C | 4.075759000 | 4.444754000  | 15.881294000 |
| H                          | 6.102344000  | 6.278081000  | 17.987297000 | C | 5.509038000 | 5.788422000  | 18.618253000 |
| H                          | 3.670310000  | 3.806399000  | 16.499517000 | C | 4.589250000 | 6.564990000  | 19.315688000 |
| H                          | 3.220287000  | 7.308812000  | 14.059397000 | H | 4.642218000 | 7.645601000  | 19.280651000 |
| Cl                         | 2.323227000  | 6.687410000  | 21.024093000 | C | 3.600663000 | 5.927292000  | 20.056801000 |
| <b>NC4 (T<sub>1</sub>)</b> |              |              |              | C | 3.512993000 | 4.541330000  | 20.114539000 |
|                            |              |              |              | H | 2.731689000 | 4.060949000  | 20.689510000 |

|    |              |              |              |
|----|--------------|--------------|--------------|
| C  | 4.447061000  | 3.782363000  | 19.415931000 |
| C  | 5.457394000  | 4.391557000  | 18.665950000 |
| C  | 10.020719000 | 0.373268000  | 15.668715000 |
| H  | 10.510831000 | 0.633126000  | 16.604750000 |
| H  | 9.680287000  | -0.664417000 | 15.710237000 |
| H  | 10.745241000 | 0.475595000  | 14.862376000 |
| H  | 4.387862000  | 2.701304000  | 19.454589000 |
| H  | 7.133559000  | 4.718207000  | 20.426299000 |
| H  | 6.282358000  | 6.278552000  | 18.040434000 |
| H  | 3.669790000  | 3.605047000  | 16.432538000 |
| H  | 3.061866000  | 7.156025000  | 14.097745000 |
| Cl | 2.422024000  | 6.903516000  | 20.941381000 |

**NC5 (S<sub>0</sub>)**

|   |             |              |              |
|---|-------------|--------------|--------------|
| N | 8.775831000 | 1.186941000  | 15.426902000 |
| C | 8.406885000 | 1.664759000  | 14.187695000 |
| C | 8.821783000 | 1.240294000  | 12.919259000 |
| H | 9.525438000 | 0.428557000  | 12.792975000 |
| C | 8.291173000 | 1.877653000  | 11.812346000 |
| H | 8.586096000 | 1.568949000  | 10.817470000 |
| C | 7.355518000 | 2.927957000  | 11.963613000 |
| C | 6.942285000 | 3.356740000  | 13.231134000 |
| H | 6.226429000 | 4.160415000  | 13.319847000 |
| C | 7.472286000 | 2.726992000  | 14.354517000 |
| C | 7.290583000 | 2.881538000  | 15.781706000 |
| C | 8.082290000 | 1.900401000  | 16.409345000 |
| C | 8.062022000 | 1.726995000  | 17.817534000 |
| C | 8.655570000 | 0.592064000  | 18.462524000 |
| H | 9.103192000 | -0.185405000 | 17.865518000 |
| C | 8.614169000 | 0.439359000  | 19.810171000 |
| H | 9.028956000 | -0.447718000 | 20.275738000 |
| C | 8.078355000 | 1.465233000  | 20.644194000 |
| C | 8.187059000 | 1.358228000  | 22.050035000 |
| H | 8.620191000 | 0.454373000  | 22.464869000 |
| C | 7.784807000 | 2.385987000  | 22.874270000 |
| H | 7.879626000 | 2.298475000  | 23.950574000 |
| C | 7.284226000 | 3.566682000  | 22.298876000 |
| H | 7.015142000 | 4.405541000  | 22.930772000 |
| C | 7.139752000 | 3.678105000  | 20.929861000 |
| C | 7.486420000 | 2.621070000  | 20.051831000 |
| C | 7.334814000 | 2.685868000  | 18.596732000 |
| C | 6.484190000 | 3.638030000  | 17.935350000 |
| C | 6.467975000 | 3.731311000  | 16.545588000 |
| C | 5.561525000 | 4.678213000  | 15.832038000 |
| C | 6.052528000 | 5.891381000  | 15.340840000 |

|   |              |              |              |
|---|--------------|--------------|--------------|
| H | 7.092227000  | 6.150949000  | 15.504646000 |
| C | 5.216862000  | 6.762243000  | 14.644838000 |
| H | 5.608963000  | 7.701521000  | 14.271189000 |
| C | 3.880457000  | 6.426014000  | 14.428407000 |
| H | 3.229647000  | 7.102323000  | 13.885772000 |
| C | 3.385303000  | 5.215614000  | 14.913281000 |
| H | 2.347738000  | 4.947338000  | 14.748409000 |
| C | 4.222156000  | 4.346207000  | 15.611099000 |
| C | 5.529984000  | 5.845221000  | 18.713449000 |
| C | 4.543198000  | 6.581083000  | 19.366021000 |
| H | 4.610457000  | 7.662963000  | 19.395297000 |
| C | 3.472927000  | 5.929765000  | 19.979221000 |
| H | 2.703941000  | 6.501857000  | 20.485968000 |
| C | 3.395932000  | 4.537498000  | 19.932311000 |
| H | 2.563847000  | 4.022867000  | 20.399940000 |
| C | 4.384839000  | 3.804024000  | 19.281301000 |
| C | 5.465816000  | 4.448685000  | 18.670100000 |
| C | 9.851358000  | 0.220033000  | 15.615043000 |
| H | 10.502468000 | 0.542870000  | 16.425938000 |
| H | 9.461270000  | -0.777459000 | 15.828023000 |
| H | 10.445148000 | 0.176739000  | 14.704587000 |
| H | 4.322910000  | 2.722274000  | 19.246574000 |
| H | 6.776609000  | 4.610965000  | 20.534421000 |
| H | 6.362750000  | 6.354854000  | 18.244733000 |
| H | 3.836685000  | 3.405865000  | 15.987833000 |
| C | 6.821589000  | 3.560865000  | 10.806021000 |
| N | 6.388578000  | 4.075449000  | 9.863427000  |

**NC5 (S<sub>1</sub>)**

|   |             |              |              |
|---|-------------|--------------|--------------|
| N | 8.878267000 | 1.302332000  | 15.433862000 |
| C | 8.528827000 | 1.745750000  | 14.156904000 |
| C | 9.009838000 | 1.313447000  | 12.930830000 |
| H | 9.772580000 | 0.550277000  | 12.852140000 |
| C | 8.460213000 | 1.878649000  | 11.778034000 |
| H | 8.805581000 | 1.567945000  | 10.801044000 |
| C | 7.440784000 | 2.844812000  | 11.887348000 |
| C | 6.960840000 | 3.283532000  | 13.132647000 |
| H | 6.176191000 | 4.023242000  | 13.170378000 |
| C | 7.517357000 | 2.741189000  | 14.292462000 |
| C | 7.278397000 | 2.898414000  | 15.711209000 |
| C | 8.103836000 | 1.938598000  | 16.366222000 |
| C | 8.028326000 | 1.698562000  | 17.778031000 |
| C | 8.497050000 | 0.544681000  | 18.408796000 |
| H | 8.936764000 | -0.255199000 | 17.833100000 |
| C | 8.366027000 | 0.371208000  | 19.789573000 |

|                            |              |              |              |   |             |              |              |
|----------------------------|--------------|--------------|--------------|---|-------------|--------------|--------------|
| H                          | 8.700272000  | -0.552616000 | 20.248150000 | C | 8.557321000 | 1.750360000  | 14.155319000 |
| C                          | 7.924651000  | 1.427605000  | 20.617154000 | C | 9.061618000 | 1.362902000  | 12.910570000 |
| C                          | 7.988079000  | 1.330730000  | 22.033051000 | H | 9.840076000 | 0.616682000  | 12.820927000 |
| H                          | 8.296976000  | 0.388235000  | 22.472249000 | C | 8.519519000 | 1.946634000  | 11.778898000 |
| C                          | 7.701081000  | 2.422501000  | 22.835794000 | H | 8.879554000 | 1.666512000  | 10.797337000 |
| H                          | 7.758583000  | 2.335446000  | 23.915192000 | C | 7.482026000 | 2.902561000  | 11.893149000 |
| C                          | 7.375152000  | 3.648662000  | 22.244810000 | C | 6.982246000 | 3.296925000  | 13.140678000 |
| H                          | 7.198508000  | 4.522270000  | 22.861870000 | H | 6.187133000 | 4.025582000  | 13.192065000 |
| C                          | 7.272304000  | 3.757367000  | 20.854576000 | C | 7.527477000 | 2.730208000  | 14.291480000 |
| C                          | 7.468127000  | 2.652682000  | 20.012820000 | C | 7.276517000 | 2.864499000  | 15.713138000 |
| C                          | 7.281665000  | 2.681452000  | 18.554551000 | C | 8.113619000 | 1.934404000  | 16.351814000 |
| C                          | 6.406960000  | 3.567305000  | 17.892846000 | C | 8.026696000 | 1.677355000  | 17.772287000 |
| C                          | 6.397652000  | 3.704612000  | 16.458117000 | C | 8.442841000 | 0.516338000  | 18.385072000 |
| C                          | 5.521761000  | 4.682292000  | 15.786163000 | H | 8.882141000 | -0.286729000 | 17.813109000 |
| C                          | 6.082638000  | 5.705190000  | 15.000734000 | C | 8.273106000 | 0.322772000  | 19.802964000 |
| H                          | 7.160203000  | 5.765328000  | 14.901000000 | H | 8.574568000 | -0.616211000 | 20.251550000 |
| C                          | 5.276649000  | 6.650678000  | 14.376510000 | C | 7.867590000 | 1.388744000  | 20.626714000 |
| H                          | 5.732258000  | 7.439037000  | 13.787540000 | C | 7.920643000 | 1.288664000  | 22.043321000 |
| C                          | 3.887309000  | 6.591644000  | 14.512892000 | H | 8.167577000 | 0.329374000  | 22.485143000 |
| H                          | 3.258469000  | 7.327622000  | 14.025002000 | C | 7.697126000 | 2.398999000  | 22.847238000 |
| C                          | 3.316109000  | 5.577135000  | 15.283857000 | H | 7.745558000 | 2.306885000  | 23.926429000 |
| H                          | 2.238595000  | 5.517662000  | 15.391021000 | C | 7.442126000 | 3.636751000  | 22.256477000 |
| C                          | 4.121661000  | 4.636769000  | 15.917386000 | H | 7.306962000 | 4.520462000  | 22.868870000 |
| C                          | 5.370493000  | 5.747749000  | 18.614248000 | C | 7.341835000 | 3.744610000  | 20.855943000 |
| C                          | 4.428970000  | 6.455241000  | 19.353996000 | C | 7.480113000 | 2.636664000  | 20.026384000 |
| H                          | 4.424309000  | 7.538878000  | 19.321801000 | C | 7.288806000 | 2.682066000  | 18.554092000 |
| C                          | 3.490254000  | 5.773918000  | 20.130284000 | C | 6.418126000 | 3.555809000  | 17.911036000 |
| H                          | 2.750091000  | 6.325889000  | 20.698402000 | C | 6.379456000 | 3.660831000  | 16.465322000 |
| C                          | 3.505403000  | 4.378703000  | 20.167912000 | C | 5.461513000 | 4.609824000  | 15.794930000 |
| H                          | 2.773297000  | 3.842641000  | 20.761244000 | C | 5.970453000 | 5.703165000  | 15.080450000 |
| C                          | 4.461371000  | 3.671711000  | 19.446803000 | H | 7.043422000 | 5.846369000  | 15.022691000 |
| C                          | 5.406908000  | 4.347052000  | 18.662677000 | C | 5.114699000 | 6.610518000  | 14.461087000 |
| C                          | 9.973385000  | 0.369465000  | 15.671131000 | H | 5.526796000 | 7.455020000  | 13.919979000 |
| H                          | 10.486798000 | 0.637714000  | 16.591730000 | C | 3.732667000 | 6.436187000  | 14.539899000 |
| H                          | 9.605018000  | -0.656605000 | 15.737223000 | H | 3.065346000 | 7.141663000  | 14.057900000 |
| H                          | 10.677241000 | 0.443387000  | 14.844959000 | C | 3.214615000 | 5.349175000  | 15.245061000 |
| H                          | 4.478501000  | 2.588944000  | 19.481088000 | H | 2.141916000 | 5.204013000  | 15.309002000 |
| H                          | 7.025720000  | 4.718527000  | 20.430067000 | C | 4.071035000 | 4.446667000  | 15.870433000 |
| H                          | 6.096932000  | 6.279956000  | 18.013406000 | C | 5.510535000 | 5.794095000  | 18.635008000 |
| H                          | 3.668414000  | 3.852305000  | 16.510238000 | C | 4.588602000 | 6.562369000  | 19.340976000 |
| C                          | 6.874734000  | 3.396895000  | 10.701463000 | H | 4.652912000 | 7.644273000  | 19.307868000 |
| N                          | 6.416394000  | 3.844200000  | 9.737434000  | C | 3.584642000 | 5.943509000  | 20.086800000 |
| <b>NC5 (T<sub>1</sub>)</b> |              |              |              | H | 2.863650000 | 6.541521000  | 20.632701000 |
| N                          | 8.904030000  | 1.295689000  | 15.410150000 | C | 3.510984000 | 4.550897000  | 20.121309000 |
|                            |              |              |              | H | 2.729736000 | 4.061338000  | 20.692097000 |

|   |              |              |              |
|---|--------------|--------------|--------------|
| C | 4.439017000  | 3.784285000  | 19.420902000 |
| C | 5.451847000  | 4.396488000  | 18.675119000 |
| C | 10.007416000 | 0.374623000  | 15.656422000 |
| H | 10.504238000 | 0.640397000  | 16.587083000 |
| H | 9.656255000  | -0.658370000 | 15.709062000 |
| H | 10.727070000 | 0.464930000  | 14.844839000 |
| H | 4.381654000  | 2.702267000  | 19.449745000 |
| H | 7.136065000  | 4.714790000  | 20.429138000 |
| H | 6.288435000  | 6.279349000  | 18.058197000 |
| H | 3.663268000  | 3.607934000  | 16.421693000 |
| C | 6.930800000  | 3.476928000  | 10.712798000 |
| N | 6.484782000  | 3.943050000  | 9.751314000  |

### NC6 (S<sub>0</sub>)

|   |             |              |              |
|---|-------------|--------------|--------------|
| N | 8.607260000 | 0.992443000  | 15.492843000 |
| C | 8.264322000 | 1.475576000  | 14.230075000 |
| C | 8.684563000 | 1.022322000  | 12.979295000 |
| H | 9.371297000 | 0.190818000  | 12.884820000 |
| C | 8.180726000 | 1.671710000  | 11.857018000 |
| H | 8.483805000 | 1.337958000  | 10.871084000 |
| C | 7.285166000 | 2.747799000  | 11.979778000 |
| H | 6.903484000 | 3.228465000  | 11.086365000 |
| C | 6.885185000 | 3.207481000  | 13.229797000 |
| H | 6.201712000 | 4.041328000  | 13.308584000 |
| C | 7.384497000 | 2.577964000  | 14.379490000 |
| C | 7.221037000 | 2.775279000  | 15.807163000 |
| C | 7.972934000 | 1.779009000  | 16.458314000 |
| C | 7.959652000 | 1.635613000  | 17.867955000 |
| C | 8.530149000 | 0.494983000  | 18.522196000 |
| H | 8.955918000 | -0.297130000 | 17.926314000 |
| C | 8.499749000 | 0.366481000  | 19.872258000 |
| H | 8.896547000 | -0.522352000 | 20.350181000 |
| C | 7.999623000 | 1.421341000  | 20.693665000 |
| C | 8.118605000 | 1.332269000  | 22.099829000 |
| H | 8.530682000 | 0.422787000  | 22.523804000 |
| C | 7.752331000 | 2.382165000  | 22.913147000 |
| H | 7.854826000 | 2.307283000  | 23.989710000 |
| C | 7.278324000 | 3.567281000  | 22.325024000 |
| H | 7.036631000 | 4.421875000  | 22.946896000 |
| C | 7.125233000 | 3.663306000  | 20.955547000 |
| C | 7.435090000 | 2.585468000  | 20.089034000 |
| C | 7.274604000 | 2.633250000  | 18.633794000 |
| C | 6.460895000 | 3.606080000  | 17.955599000 |
| C | 6.439569000 | 3.672058000  | 16.563084000 |
| C | 5.569172000 | 4.647191000  | 15.842262000 |

|   |              |              |              |
|---|--------------|--------------|--------------|
| C | 6.111583000  | 5.824361000  | 15.318637000 |
| H | 7.166797000  | 6.031574000  | 15.455956000 |
| C | 5.307271000  | 6.727729000  | 14.627186000 |
| H | 5.739666000  | 7.639177000  | 14.229667000 |
| C | 3.950097000  | 6.460180000  | 14.446816000 |
| H | 3.323157000  | 7.162332000  | 13.908835000 |
| C | 3.403557000  | 5.284927000  | 14.962111000 |
| H | 2.349697000  | 5.069491000  | 14.825115000 |
| C | 4.209422000  | 4.383577000  | 15.655942000 |
| C | 5.621486000  | 5.870121000  | 18.702116000 |
| C | 4.676336000  | 6.665048000  | 19.347133000 |
| H | 4.798723000  | 7.742421000  | 19.359712000 |
| C | 3.577275000  | 6.078341000  | 19.974531000 |
| H | 2.840735000  | 6.696364000  | 20.475553000 |
| C | 3.429720000  | 4.691180000  | 19.949245000 |
| H | 2.574933000  | 4.226394000  | 20.428054000 |
| C | 4.376895000  | 3.898850000  | 19.305134000 |
| C | 5.486433000  | 4.478091000  | 18.679717000 |
| H | 4.259924000  | 2.821226000  | 19.287111000 |
| H | 6.783666000  | 4.600054000  | 20.550347000 |
| H | 6.476788000  | 6.329855000  | 18.222351000 |
| H | 3.783035000  | 3.471956000  | 16.058290000 |
| C | 9.679499000  | 0.066880000  | 15.687579000 |
| C | 9.492779000  | -1.278537000 | 15.378437000 |
| C | 10.907835000 | 0.524523000  | 16.163133000 |
| C | 10.543455000 | -2.176555000 | 15.558574000 |
| C | 11.949960000 | -0.379402000 | 16.352437000 |
| C | 11.769607000 | -1.729975000 | 16.050654000 |
| H | 8.529506000  | -1.613738000 | 15.013435000 |
| H | 11.033732000 | 1.575962000  | 16.392251000 |
| H | 10.400376000 | -3.224618000 | 15.322408000 |
| H | 12.903303000 | -0.028443000 | 16.730143000 |
| H | 12.582821000 | -2.431457000 | 16.197031000 |

### NC6 (S<sub>1</sub>)

|   |             |             |              |
|---|-------------|-------------|--------------|
| N | 8.685813000 | 1.072848000 | 15.452758000 |
| C | 8.339588000 | 1.513014000 | 14.162628000 |
| C | 8.798400000 | 1.049293000 | 12.939342000 |
| H | 9.534972000 | 0.259630000 | 12.873197000 |
| C | 8.260799000 | 1.634241000 | 11.787486000 |
| H | 8.590015000 | 1.291632000 | 10.813863000 |
| C | 7.300018000 | 2.646599000 | 11.884224000 |
| H | 6.885566000 | 3.076685000 | 10.979652000 |
| C | 6.867298000 | 3.124198000 | 13.124052000 |
| H | 6.135019000 | 3.916642000 | 13.168016000 |

|   |             |              |              |
|---|-------------|--------------|--------------|
| C | 7.400410000 | 2.567464000  | 14.293044000 |
| C | 7.204562000 | 2.779462000  | 15.720424000 |
| C | 7.988627000 | 1.799437000  | 16.385243000 |
| C | 7.926844000 | 1.582218000  | 17.806026000 |
| C | 8.357842000 | 0.421213000  | 18.445784000 |
| H | 8.780512000 | -0.391970000 | 17.875635000 |
| C | 8.219622000 | 0.270182000  | 19.833820000 |
| H | 8.517840000 | -0.660116000 | 20.304409000 |
| C | 7.832630000 | 1.355136000  | 20.645483000 |
| C | 7.893002000 | 1.280166000  | 22.066782000 |
| H | 8.145406000 | 0.328524000  | 22.522466000 |
| C | 7.678338000 | 2.400283000  | 22.849942000 |
| H | 7.735436000 | 2.326296000  | 23.930696000 |
| C | 7.425732000 | 3.637292000  | 22.242687000 |
| H | 7.307903000 | 4.530075000  | 22.845938000 |
| C | 7.318856000 | 3.724971000  | 20.850007000 |
| C | 7.441199000 | 2.597852000  | 20.028034000 |
| C | 7.240943000 | 2.613779000  | 18.567239000 |
| C | 6.405735000 | 3.532439000  | 17.900377000 |
| C | 6.374925000 | 3.640815000  | 16.460739000 |
| C | 5.524257000 | 4.639705000  | 15.786564000 |
| C | 6.106690000 | 5.628027000  | 14.973522000 |
| H | 7.183276000 | 5.643989000  | 14.849462000 |
| C | 5.324961000 | 6.596161000  | 14.352564000 |
| H | 5.798187000 | 7.357087000  | 13.741666000 |
| C | 3.937969000 | 6.595560000  | 14.520879000 |
| H | 3.328114000 | 7.349791000  | 14.036708000 |
| C | 3.344767000 | 5.616275000  | 15.320354000 |
| H | 2.268588000 | 5.602349000  | 15.453670000 |
| C | 4.126952000 | 4.653466000  | 15.949698000 |
| C | 5.513925000 | 5.785961000  | 18.590165000 |
| C | 4.625490000 | 6.565524000  | 19.323443000 |
| H | 4.686159000 | 7.646505000  | 19.266872000 |
| C | 3.656195000 | 5.959719000  | 20.124279000 |
| H | 2.957456000 | 6.567736000  | 20.687641000 |
| C | 3.587108000 | 4.567270000  | 20.191834000 |
| H | 2.830735000 | 4.089320000  | 20.804147000 |
| C | 4.489973000 | 3.788116000  | 19.476354000 |
| C | 5.466398000 | 4.387084000  | 18.668711000 |
| H | 4.440980000 | 2.707289000  | 19.533836000 |
| H | 7.124664000 | 4.690887000  | 20.408787000 |
| H | 6.263474000 | 6.260307000  | 17.969361000 |
| H | 3.656530000 | 3.897669000  | 16.566083000 |
| C | 9.747715000 | 0.152331000  | 15.699915000 |
| C | 9.649150000 | -1.157908000 | 15.235383000 |

|   |              |              |              |
|---|--------------|--------------|--------------|
| C | 10.871146000 | 0.584642000  | 16.405667000 |
| C | 10.688252000 | -2.049640000 | 15.490371000 |
| C | 11.901901000 | -0.315227000 | 16.658412000 |
| C | 11.811872000 | -1.631766000 | 16.204191000 |
| H | 8.761618000  | -1.474379000 | 14.701980000 |
| H | 10.927297000 | 1.610205000  | 16.748207000 |
| H | 10.614640000 | -3.071845000 | 15.138554000 |
| H | 12.776927000 | 0.013144000  | 17.206853000 |
| H | 12.616437000 | -2.329665000 | 16.404440000 |

### NC6 (T1)

|   |             |              |              |
|---|-------------|--------------|--------------|
| N | 8.686105000 | 1.043859000  | 15.435669000 |
| C | 8.343563000 | 1.499105000  | 14.161235000 |
| C | 8.815219000 | 1.067618000  | 12.922675000 |
| H | 9.557951000 | 0.284178000  | 12.845616000 |
| C | 8.284664000 | 1.670791000  | 11.786626000 |
| H | 8.623880000 | 1.351528000  | 10.807916000 |
| C | 7.311701000 | 2.679230000  | 11.890774000 |
| H | 6.904918000 | 3.121937000  | 10.988742000 |
| C | 6.865257000 | 3.123633000  | 13.130951000 |
| H | 6.122500000 | 3.906205000  | 13.188940000 |
| C | 7.393028000 | 2.546615000  | 14.295625000 |
| C | 7.191681000 | 2.741886000  | 15.722503000 |
| C | 7.983019000 | 1.783054000  | 16.375380000 |
| C | 7.907626000 | 1.558075000  | 17.801207000 |
| C | 8.291560000 | 0.392633000  | 18.426962000 |
| H | 8.703333000 | -0.428588000 | 17.859443000 |
| C | 8.131397000 | 0.228844000  | 19.849353000 |
| H | 8.402067000 | -0.713178000 | 20.311223000 |
| C | 7.777879000 | 1.323014000  | 20.659044000 |
| C | 7.842868000 | 1.242860000  | 22.077138000 |
| H | 8.054741000 | 0.280731000  | 22.530961000 |
| C | 7.677467000 | 2.373235000  | 22.865989000 |
| H | 7.735840000 | 2.295480000  | 23.945889000 |
| C | 7.468605000 | 3.612394000  | 22.258894000 |
| H | 7.380943000 | 4.510620000  | 22.858693000 |
| C | 7.354958000 | 3.702663000  | 20.858518000 |
| C | 7.435318000 | 2.577751000  | 20.043463000 |
| C | 7.230397000 | 2.609710000  | 18.572162000 |
| C | 6.404445000 | 3.520484000  | 17.920689000 |
| C | 6.353567000 | 3.601375000  | 16.471297000 |
| C | 5.480963000 | 4.590281000  | 15.798152000 |
| C | 6.040988000 | 5.638406000  | 15.054679000 |
| H | 7.119283000 | 5.713603000  | 14.973497000 |
| C | 5.230246000 | 6.587324000  | 14.437059000 |

|   |              |              |              |
|---|--------------|--------------|--------------|
| H | 5.682499000  | 7.396289000  | 13.874091000 |
| C | 3.841952000  | 6.500609000  | 14.546011000 |
| H | 3.209618000  | 7.238964000  | 14.065993000 |
| C | 3.272626000  | 5.458182000  | 15.278598000 |
| H | 2.194541000  | 5.380582000  | 15.365937000 |
| C | 4.084714000  | 4.514695000  | 15.902559000 |
| C | 5.636999000  | 5.820252000  | 18.613396000 |
| C | 4.768986000  | 6.653483000  | 19.314058000 |
| H | 4.896864000  | 7.728977000  | 19.261778000 |
| C | 3.737547000  | 6.107688000  | 20.079204000 |
| H | 3.058638000  | 6.756395000  | 20.621171000 |
| C | 3.582241000  | 4.722589000  | 20.138238000 |
| H | 2.779192000  | 4.289660000  | 20.724362000 |
| C | 4.456533000  | 3.890860000  | 19.443027000 |
| C | 5.496619000  | 4.429325000  | 18.678063000 |
| H | 4.335756000  | 2.814757000  | 19.490943000 |
| H | 7.186485000  | 4.674545000  | 20.419650000 |
| H | 6.436356000  | 6.248934000  | 18.021265000 |
| H | 3.637104000  | 3.711651000  | 16.475544000 |
| C | 9.766520000  | 0.146334000  | 15.687939000 |
| C | 9.690730000  | -1.170374000 | 15.237275000 |
| C | 10.887438000 | 0.597932000  | 16.384506000 |
| C | 10.746850000 | -2.043281000 | 15.490566000 |
| C | 11.933099000 | -0.283620000 | 16.644718000 |
| C | 11.865590000 | -1.604058000 | 16.198455000 |
| H | 8.807020000  | -1.505966000 | 14.708702000 |
| H | 10.929043000 | 1.626302000  | 16.721822000 |
| H | 10.689255000 | -3.068453000 | 15.143786000 |
| H | 12.802711000 | 0.062756000  | 17.191062000 |
| H | 12.682155000 | -2.287381000 | 16.400882000 |

## References:

1. Melhuish, W. H. Quantum efficiencies of Fluorescence of Organic Substances: Effect of Solvent and Concentration of the Florescent solute. *J. Phys. Chem.* **1961**, *65*, 229–235.
- [2] Lakowicz, J. R. Principles of Fluorescence Spectroscopy; Plenum: New York, **1999**; 3rd edition.
- [3] (a) Roth, H. G.; Romero, N. A.; Nicewicz, D. A. Experimental and Calculated Electrochemical Potentials of Common Organic Molecules for Applications to Single-Electron Redox Chemistry. *Synlett* **2016**, *27*, 714–723. (b) Connelly, N. G.; Geiger, W. E. Chemical Redox Agents for Organometallic Chemistry. *Chem. Rev.* **1996**, *96*, 877-910.
- [4] Pavlishchuk, V. V.; Addison, A. W. Conversion Constants for Redox Potentials Measured versus Different Reference Electrodes in Acetonitrile Solutions at 25°C *Inorganic Chimica Acta* **2000**, *298*, 97–102.
- [5] Buzzetti, L.; Crisenza, G. E. M.; Melchiorre, P. Mechanistic Studies in Photocatalysis. *Angew. Chem., Int. Ed.* **2019**, *58*, 3730–3747.
- [6] (a) Kundu, S.; Banerjee, A.; Maji, M. S. Brønsted Acid-Catalyzed Tandem Pinacol-Type Rearrangement for the Synthesis of  $\alpha$ -(3-Indolyl) Ketones by Using  $\alpha$ -Hydroxy Aldehydes. *J. Org. Chem.* **2019**, *84*, 16003–16012. (b) Kundu, S.; Banerjee, A.; Pal, S. C.; Ghosh, M.; Maji, M. S. Cascade Annulative  $\pi$ -Extension for the Rapid Construction of Carbazole Based Polyaromatic Hydrocarbons. *Chem. Commun.* **2021**, *57*, 5762-5765.
- [7] (a) Sun, K.; Xie, X.; Liu, Y.; Jiang, W.; Ban, X.; Huang, B.; Sun, Y. Thermally cross-linkable thermally activated delayed fluorescent materials for efficient blue solution-processed organic light-emitting diodes. *J. Mater. Chem. C*, **2016**, *4*, 8973–8979. (b) Yu, W.; Gu, S.; Fu, Y.; Xiong, S.; Pan, C.; Liu, Y.; Yu, G. Carbazole-decorated Covalent Triazine Frameworks: Novel Nonmetal Catalysts for Carbon dioxide Fixation and Oxygen Reduction Reaction. *J. Catal.* **2018**, *362*, 1–9.
- [8] Jiang, w.; Duan, L.; Qiao, J.; Dong, G.; Zhang, D.; Wang, L.; Qiu, Y. High-triplet-energy Tri-carbazole Derivatives as Host Materials for Efficient Solution-processed Blue Phosphorescent Devices. *J. Mater. Chem.* **2011**, *21*, 4918–4926.
- [9] (a) Wagner, D.; Hoffmann, S. T.; Heinemeyer, U.; Münster, I.; Köhler, A.; Strohriegl, P.; Triazine Based Bipolar Host Materials for Blue Phosphorescent OLEDs. *Chem. Mater.* **2013**, *25*, 3758–3765. (b) Wan, J.-L.; Cui, J.-F.; Zhong, W.-Q.; Huang, J. -M. Iminyl-Radicals by Electrochemical Decarboxylation of  $\alpha$ -Imino-oxy acids: C of Indole-Fused Polycyclics. *Chem. Commun.* **2021**, *57*, 10242–10245. (c) Bernard, R.; Barsu, C.; Baldeck, P. L.; Andraud, C.; Cornu, D.; Scharff, J.-P.; Miele, P. Synthesis, and Two Photon Absorption Properties of 7,7'-(iminundecahydro-*closo*-dodecaborate)-9,9'-(dihexyl)-2,2'-bifluorene. *Chem. Commun.* **2008**, 3765–3767.
- [10] (a) Yang, P.; Zheng, C.; Nie, Y.-H.; You, S.-L. Palladium-Catalyzed Dearomative 1,4-Difunctionalization of Naphthalenes. *Chem. Sci.* **2020**, *11*, 6830–6835. (c) Abel-Snape, X.; Whyte, A.; Lautens, M. Synthesis of Aminated Phenanthridinones via Palladium/Norbornene Catalysis. *Org. Lett.* **2020**, *22*, 7920–7925. (b) Barraza, S. J.; Denmark, S. E. Unexpected



Rearrangement of 2-Bromoaniline under Biphasic Alkylation Conditions. *Synlett* **2017**, 28, 2891–2895.

[11] Kundu, S.; Roy, L.; Maji, M. S. Development of Carbazole-Cored Organo-Photocatalyst for Visible Light-Driven Reductive Pinacol/Imino-Pinacol Coupling. *Org. Lett.* **2022**, 24, 9001–9006.

[12] Kundu, S.; Maji, M. S. Solution-Phase Late-Stage Chemoselective Photocatalytic Removal of Sulfonyl and Phenacyl Groups in Peptides. *Chem.–Eur. J.* **2024**, 30, e2024000.

[13] (a) Zhang L.; Jiao, L. Visible-Light-Induced Organocatalytic Borylation of Aryl Chlorides. *J. Am. Chem. Soc.* **2019**, 141, 9124–9128. (b) Tsukamoto, H.; Kondo, Y. Palladium (II)-Catalyzed Annulation of Alkynes with ortho-Ester-Containing Phenylboronic Acids. *Org. Lett.* **2007**, 9, 4227–4230. (c) Diev, V. V.; Hanson, K.; Zimmerman, J. D.; Forrest, S. R.; Thompson, M. E. Fused Pyrene–Diporphyrins: Shifting Near-Infrared Absorption to 1.5  $\mu\text{m}$  and Beyond. *Angew. Chem., Int. Ed.* **2010**, 49, 5523–5526. (d) Zhao, J.-H.; Zhou, Z.-Z.; Zhang, Y.; Su, X.; Chen, X.-M.; Liang, Y.-M. Visible-light-mediated Borylation of Aryl and Alkyl Halides with a Palladium Complex. *Org. Biomol. Chem.* **2020**, 18, 4390–4394. (g) Han, F. S.; Higuchi, M.; Kurth, D. G. Diverse Synthesis of Novel Bisterpyridines via Suzuki-Type Cross-Coupling. *Org. Lett.* **2007**, 9, 559–562. (e) Wang, X.; Liu, W.-G.; Tung, C.-H.; Wu, L.-Z.; Cong, H. A Monophosphine Ligand Derived from Anthracene Photodimer: Synthetic Applications for Palladium-Catalyzed Coupling Reactions. *Org. Lett.* **2019**, 21, 8158–8163 (f) Chua, M.-H.; Zhou, H.; Lin, T. T.; Wu, J.; Xu, J. W. Aggregation-Induced Emission Active 3,6-Bis(1,2,2-Triphenylvinyl) Carbazole and Bis(4-(1,2,2-Triphenylvinyl)Phenyl)Amine-Based Poly(Acrylates) for Explosive Detection. *J. Polym. Sci., Part A: Polym Chem.* **2017**, 55, 672–681. (h) Taura, D.; Shimizu, K.; Yokota, C.; Ikeda, R.; Suzuki, Y.; Iida, H.; Ousaka, N.; Yashima, E. Fluorescent Molecular Spring that Visualizes the Extension and Contraction Motions of a Double-Stranded Helicate Bearing Terminal Pyrene Units Triggered by Release and Binding of Alkali Metal Ions. *Chem. Commun.* **2019**, 55, 12084–12087. (i) Guo, X.; Zhang, Y.; Hu, Y.; Yang, J.; Li, Y.; Ni, Z.; Dong, H.; Hu, W. Molecular Weight Engineering in High-Performance Ambipolar Emissive Mesopolymers. *Angew. Chem., Int. Ed.* **2021**, 60, 14902–14908.

[14] Zeng, H.; Dou, Q.; Li, C.-J. Photoinduced Transition-Metal-Free Cross-Coupling of Aryl Halides with H-Phosphonates. *Org. Lett.* **2019**, 21, 1301–1305.

[15] (a) Manikandan, T. S.; Ramesh, R.; Semeril, D. The Tandem C–H/N–H Activation of *N*-Methyl Arylamide Catalyzed by Dinuclear Pd(II) Benzhydrazone Complex: A Concise Access to Phenanthridinone. *Organometallics* **2019**, 38, 319–328. (b) Chen, Z.; Wang, X. A Pd-Catalyzed, Boron Ester-mediated, Reductive Cross-Coupling of Two Aryl Halides to Synthesize Tricyclic Biaryls. *Org. Biomol. Chem.* **2017**, 15, 5790–5796. (c) Sharma, S.; Kumar, M.; Sharma, S.; Nayal, O. S.; Kumar, N.; Singh, B.; Sharma, U. Microwave Assisted Synthesis of Phenanthridinones and Dihydrophenanthridines by Vasicine/KO<sup>t</sup>Bu Promoted Intramolecular C–H Arylation. *Org. Biomol. Chem.* **2016**, 14, 8536–8544. (d) Conde, N.; Churrua, F.; SanMartin, R.; Herrero, M. T.; Dominguez, E. A Further Decrease in the Catalyst Loading for the Palladium-Catalyzed Direct Intramolecular Arylation of Amides and Sulfonamides. *Adv. Synth. Catal.* **2015**, 357, 1525–1531. (e) Chi, Z.; Gao, Y.; Yang, L.; Zhou,

C.; Zhang, M.; Cheng, P.; Li, G. Dearomative Spirocyclization *via* Visible-Light-Induced Reductive Hydroarylation of Non-activated Arenes. *Chinese Chemical Letters* **2022**, *33*, 225–228.

[16] Frisch, M. J.; Trucks, G. W.; Schlegel, H. B.; Scuseria, G. E.; Robb, M. A.; Cheeseman, J. R.; Scalmani, G.; Barone, V.; Petersson, G. A.; Nakatsuji, H.; Li, X.; Caricato, M.; Marenich, A. V.; Bloino, J.; Janesko, B. G.; Gomperts, R.; Mennucci, B.; Hratchian, H. P.; Ortiz, J. V.; Izmaylov, A. F.; Sonnenberg, J. L.; Williams-Young, D.; Ding, F.; Lipparini, F.; Egidi, F.; Goings, J.; Peng, B.; Petrone, A.; Henderson, T.; Ranasinghe, D.; Zakrzewski, V. G.; Gao, J.; Rega, N.; Zheng, G.; Liang, W.; Hada, M.; Ehara, M.; Toyota, K.; Fukuda, R.; Hasegawa, J.; Ishida, M.; Nakajima, T.; Honda, Y.; Kitao, O.; Nakai, H.; Vreven, T.; Throssell, K.; Montgomery, J. A., Jr.; Peralta, J. E.; Ogliaro, F.; Bearpark, M. J.; Heyd, J. J.; Brothers, E. N.; Kudin, K. N.; Staroverov, V. N.; Keith, T. A.; Kobayashi, R.; Normand, J.; Raghavachari, K.; Rendell, A. P.; Burant, J. C.; Iyengar, S. S.; Tomasi, J.; Cossi, M.; Millam, J. M.; Klene, M.; Adamo, C.; Cammi, R.; Ochterski, J. W.; Martin, R. L.; Morokuma, K.; Farkas, O.; Foresman, J. B.; Fox, D. J. *Gaussian 16* (Revision B.01): Gaussian, Inc.: Wallingford CT (**2016**).

[17] Hehre, W. J.; Ditchfield, R.; Pople, J. A. Self-Consistent Molecular Orbital Methods. XII. Further Extensions of Gaussian-Type Basis Sets for Use in Molecular Orbital Studies of Organic Molecules. *J. Chem. Phys.* **1972**, *56*, 2257–2261.

[18] Marenich, A. V.; Cramer, C. J.; Truhlar, D. G. Universal Solvation Model Based on Solute Electron Density and on a Continuum Model of the Solvent Defined by the Bulk Dielectric Constant and Atomic Surface Tensions. *J. Phys. Chem. B* **2009**, *113*, 6378.

# $^1\text{H}$ , $^{13}\text{C}$ , $^{11}\text{B}$ , $^{31}\text{P}$ and $^{19}\text{F}$ NMR Spectra:

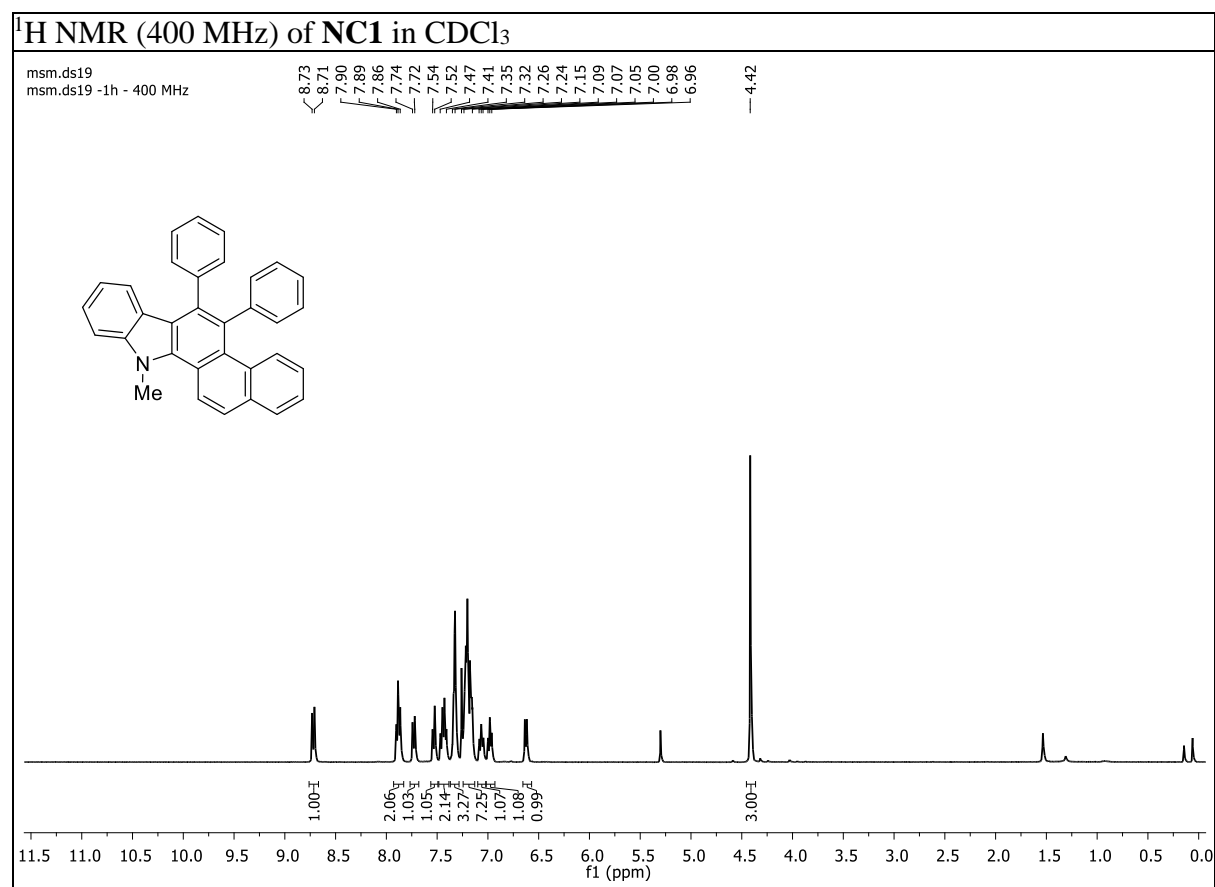

<sup>1</sup>H (500 MHz) and <sup>13</sup>C (126 MHz) NMR of NC2 in CDCl<sub>3</sub>

msm.ds23f1

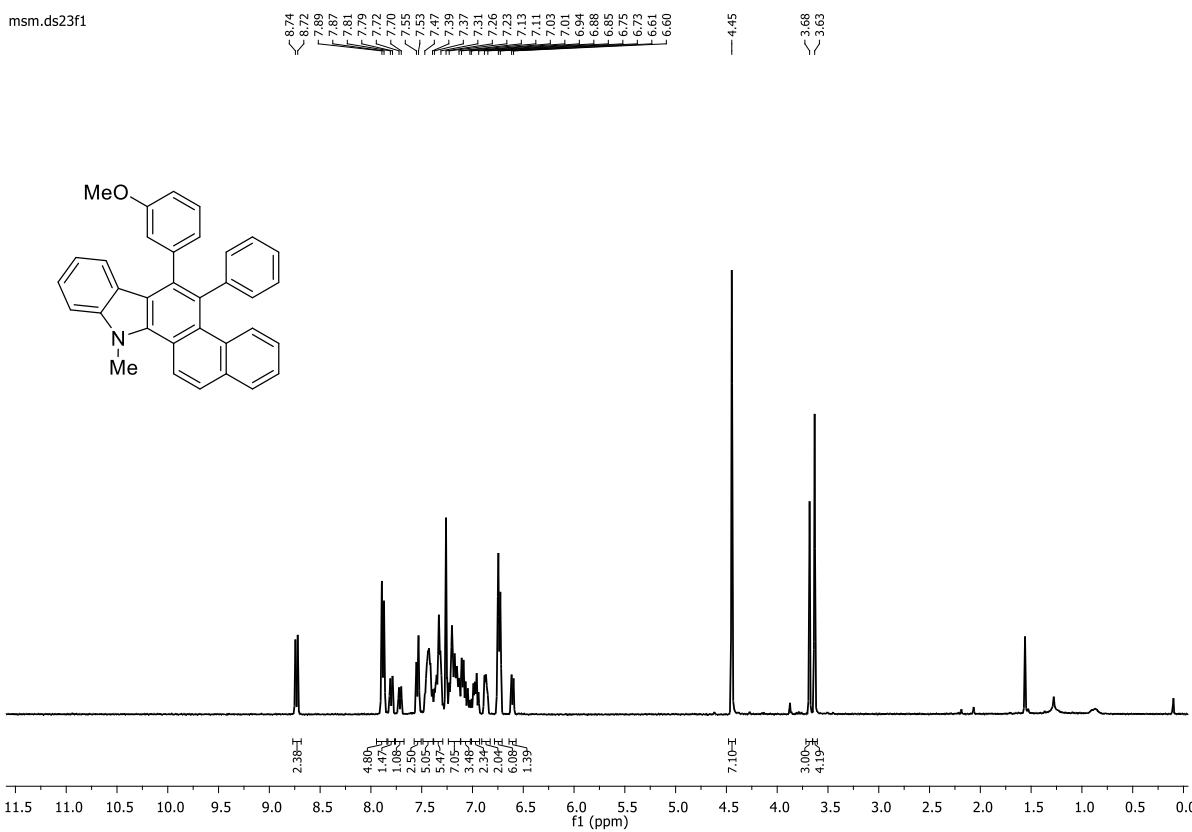

msm.ds23c 13c  
msm.ds23c 13C NMR 400 MHZ

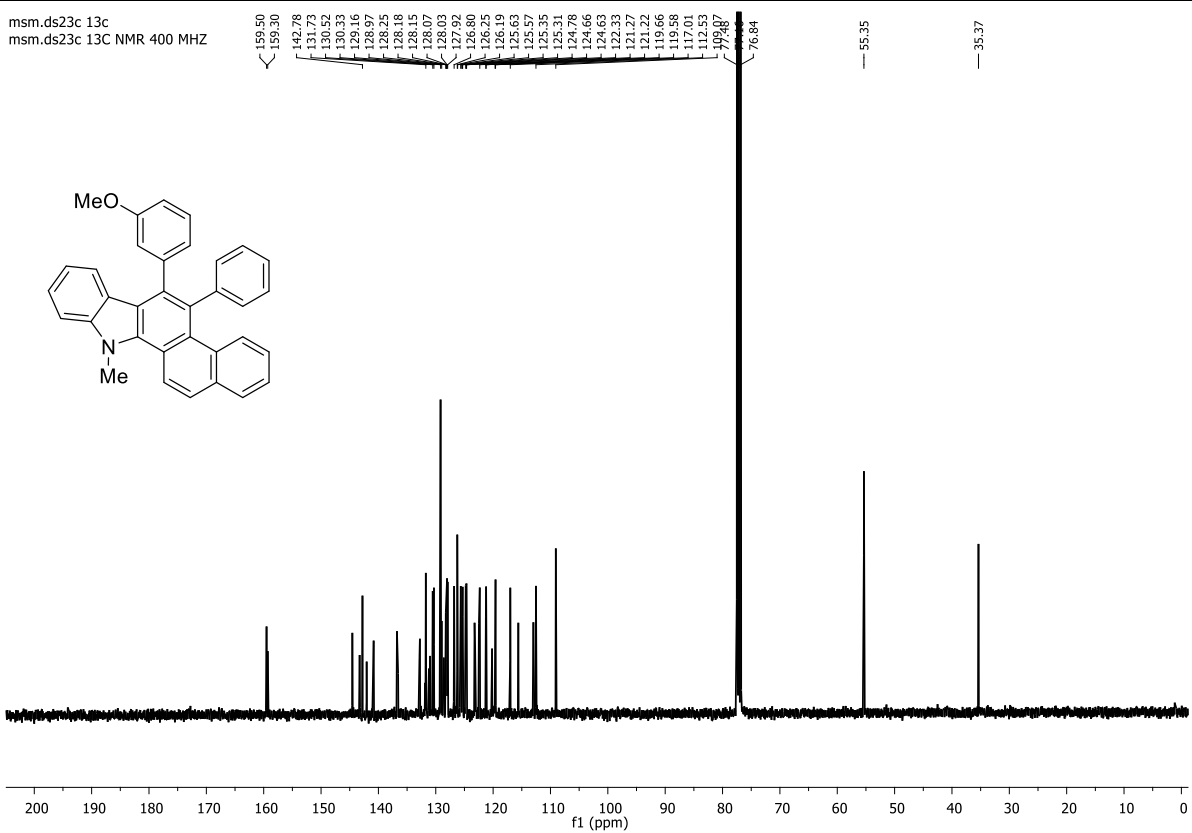

<sup>1</sup>H (400 MHz) NMR of NC3 in CDCl<sub>3</sub>

msm.ds09  
msm.ds09 -1h - 400 MHz

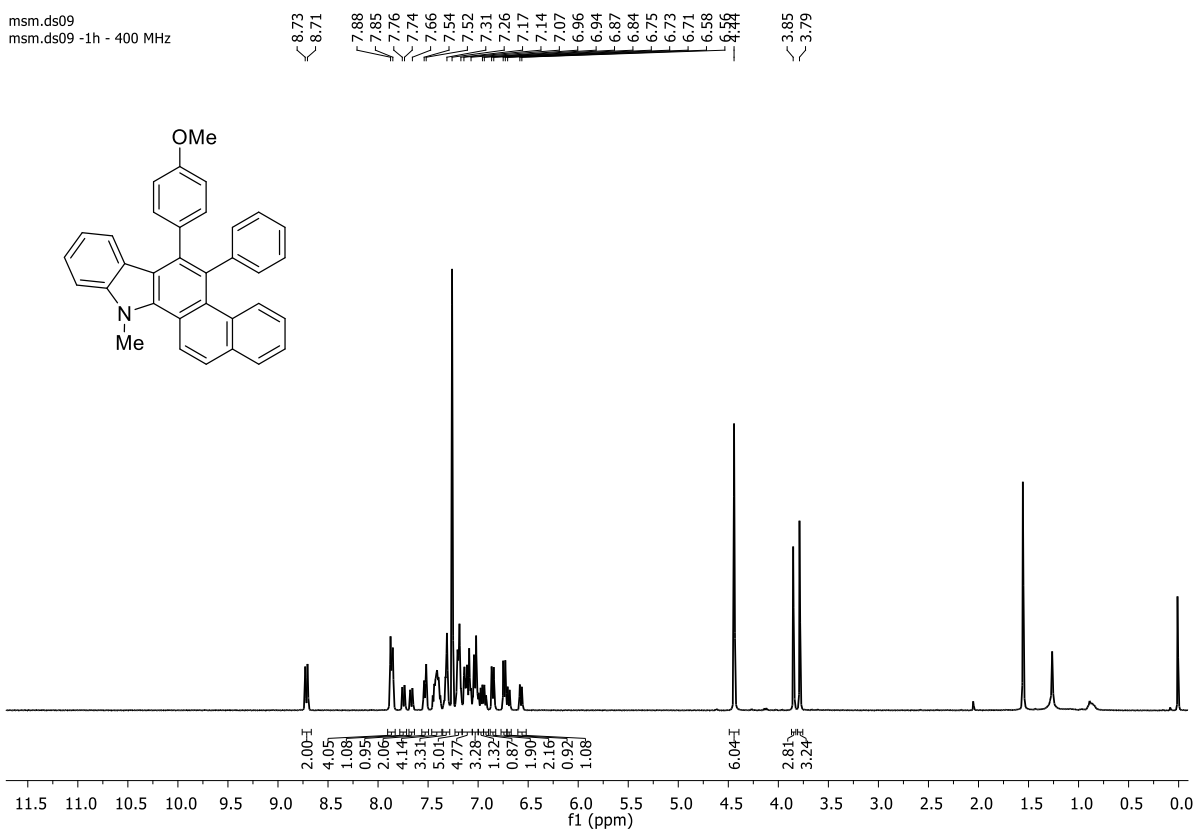

<sup>1</sup>H (500 MHz) and <sup>13</sup>C (126 MHz) NMR of NC4 in CDCl<sub>3</sub>

msm.ds13C1  
msm.ds13C1 1H NMR

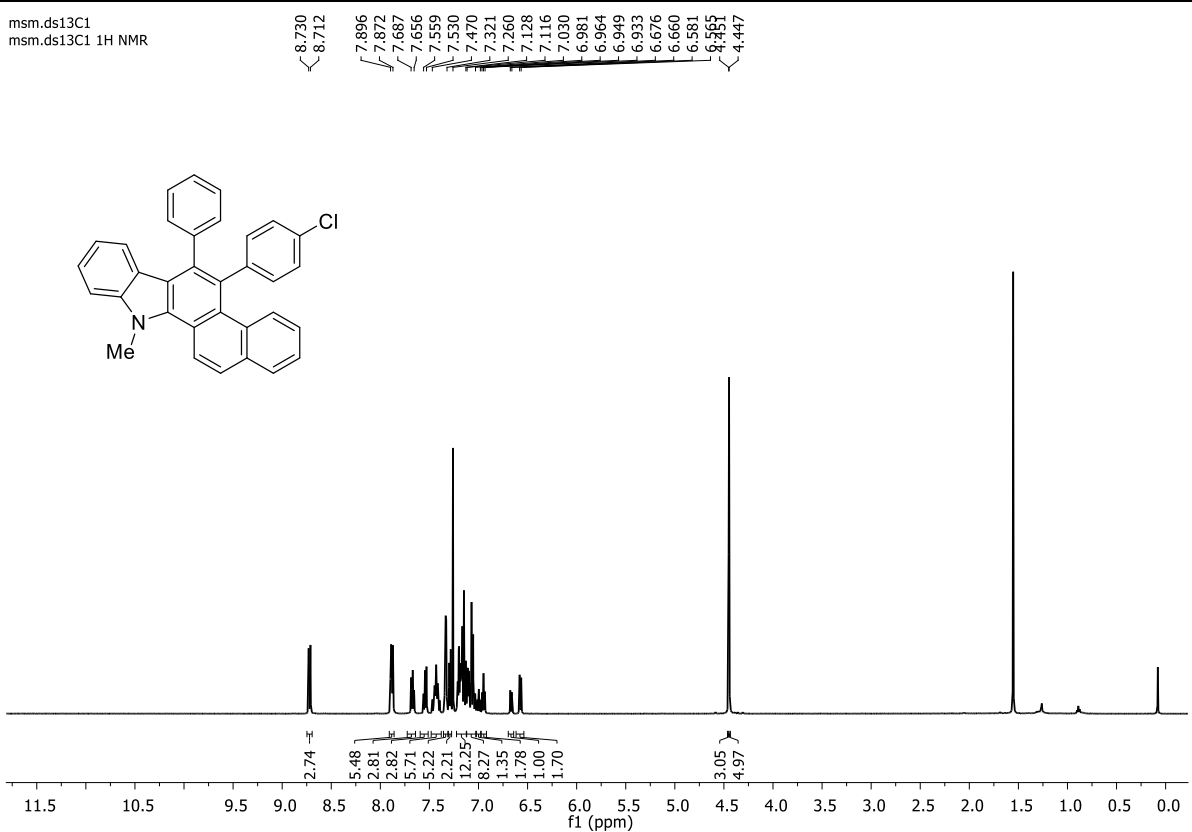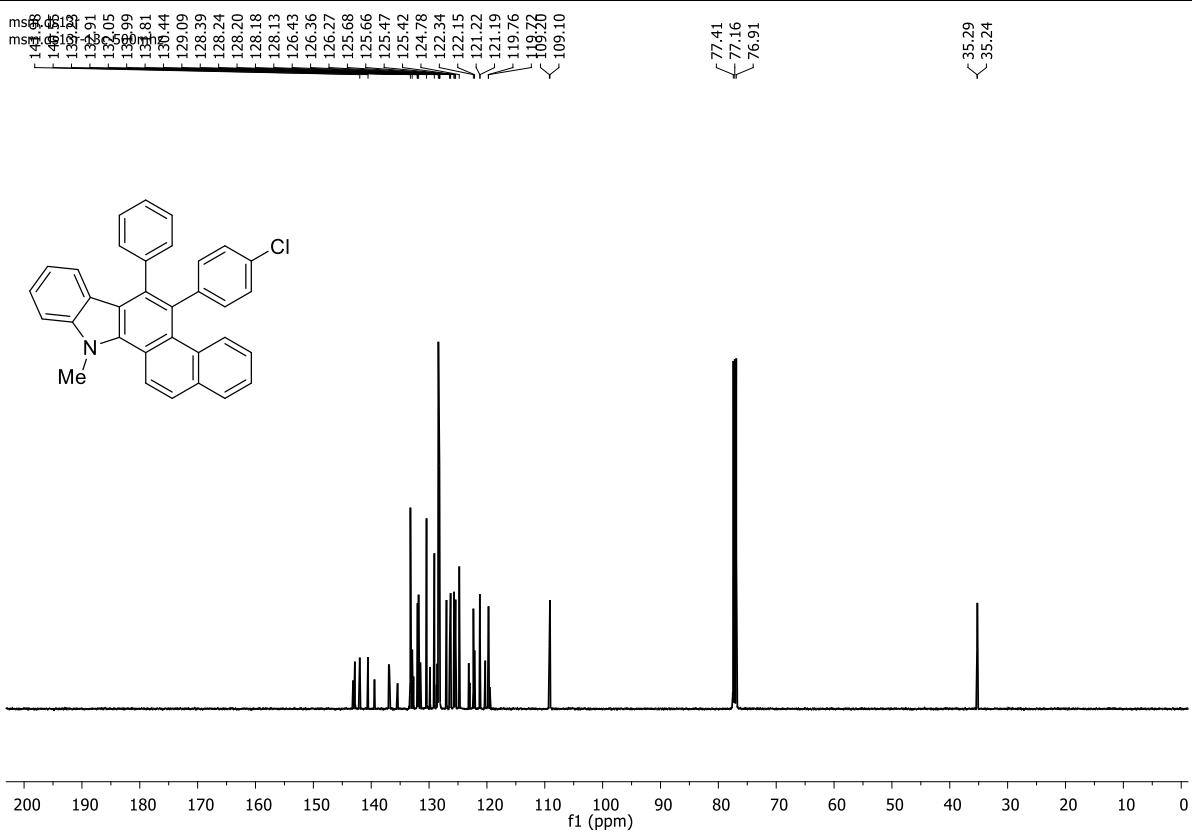

$^1\text{H}$  (500 MHz) and  $^{13}\text{C}$  (126 MHz) NMR of NC5 in  $\text{CDCl}_3$

msm.ds70p  
msm / ds / 70p - 13c - 500mhz

8.66  
8.64  
7.90  
7.87  
7.71  
7.69  
7.63  
7.61  
7.61  
7.52  
7.50  
7.43  
7.33  
7.32  
7.26  
7.19  
7.18  
7.12  
7.09  
7.06  
6.80

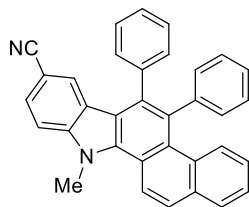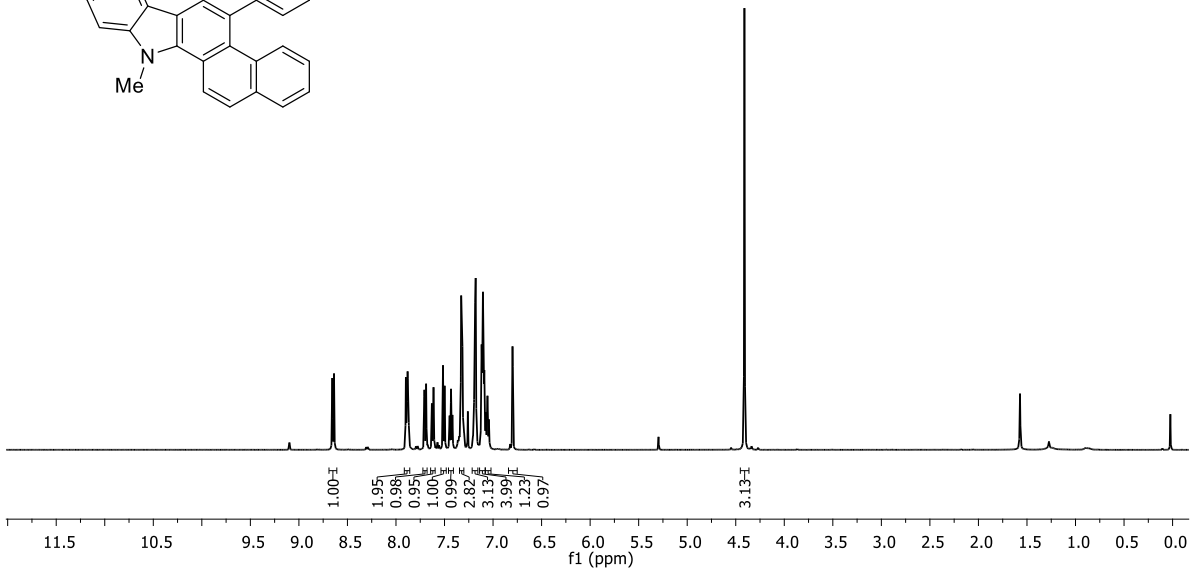

msm.ds70p  
msm / ds

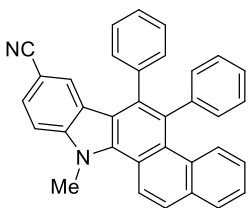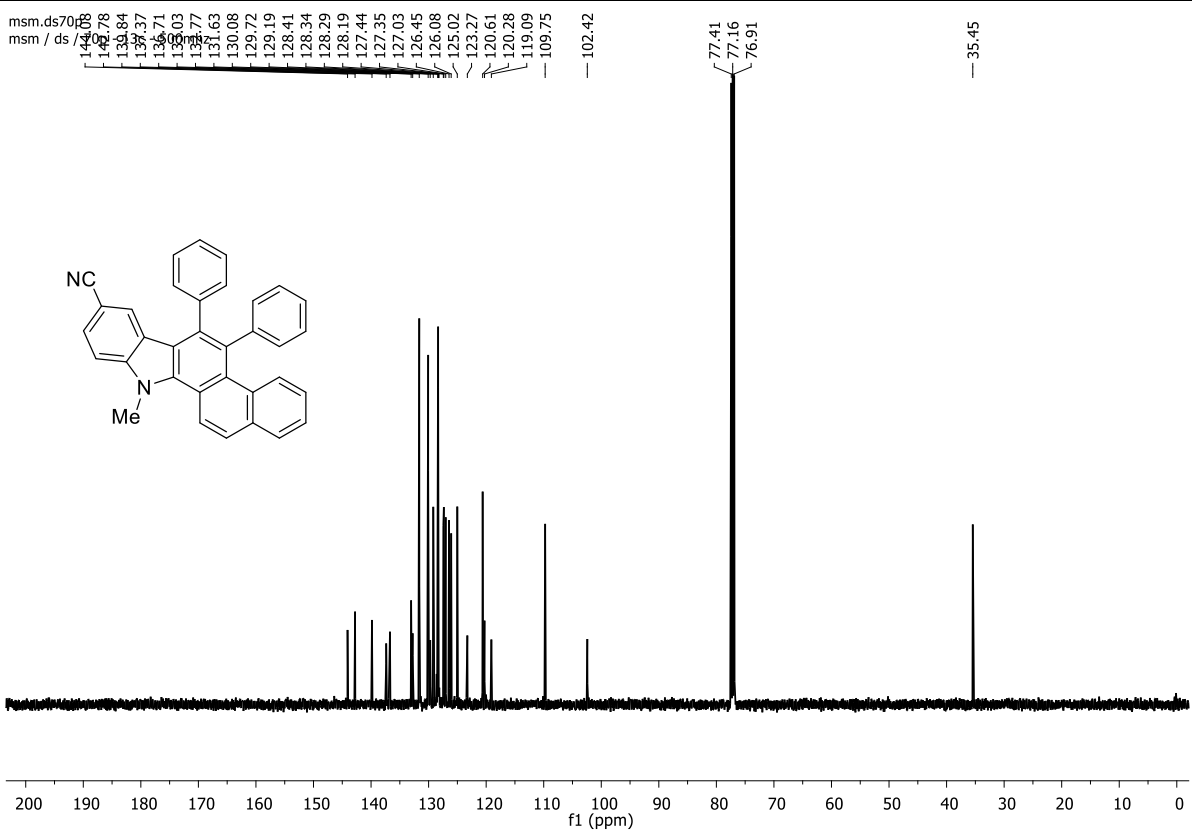

<sup>1</sup>H (500 MHz) and <sup>13</sup>C (126 MHz) NMR of NC6 in CDCl<sub>3</sub>

msm.ds106c  
msm / ds / 106 (c) - 13c - 500mhz

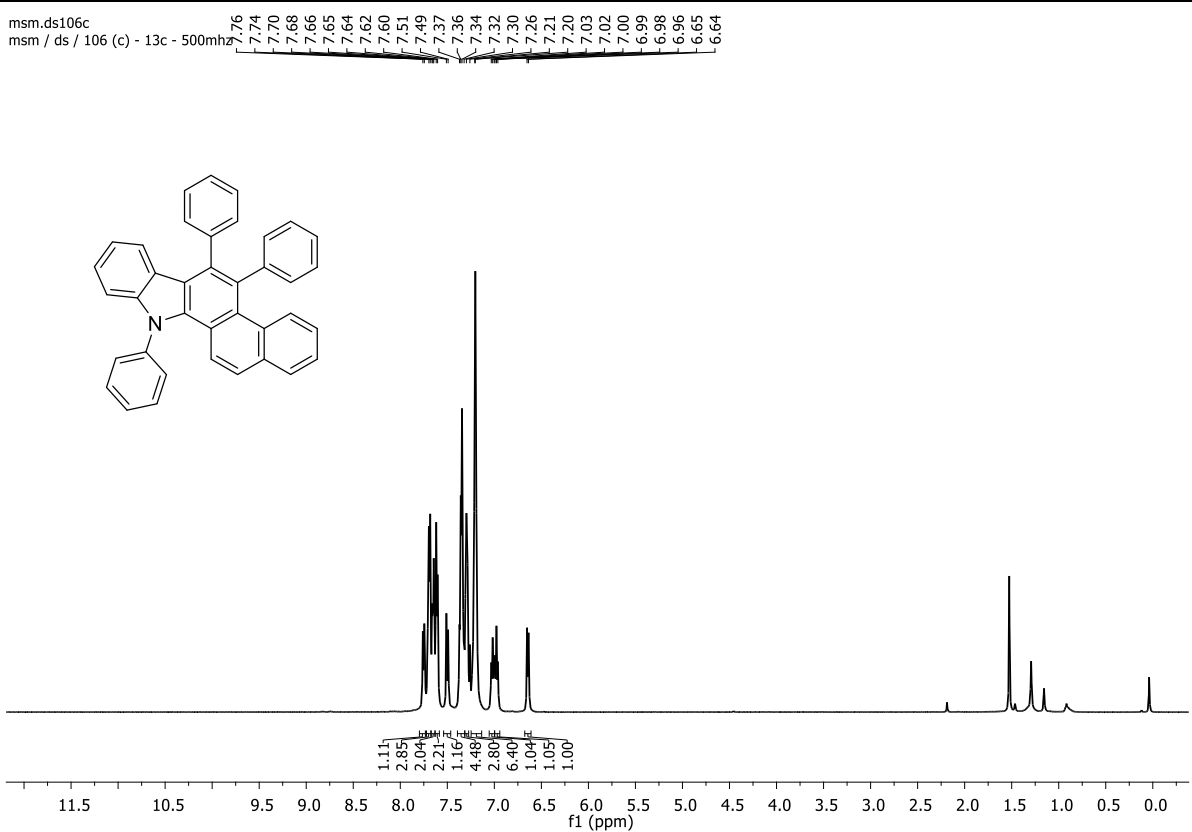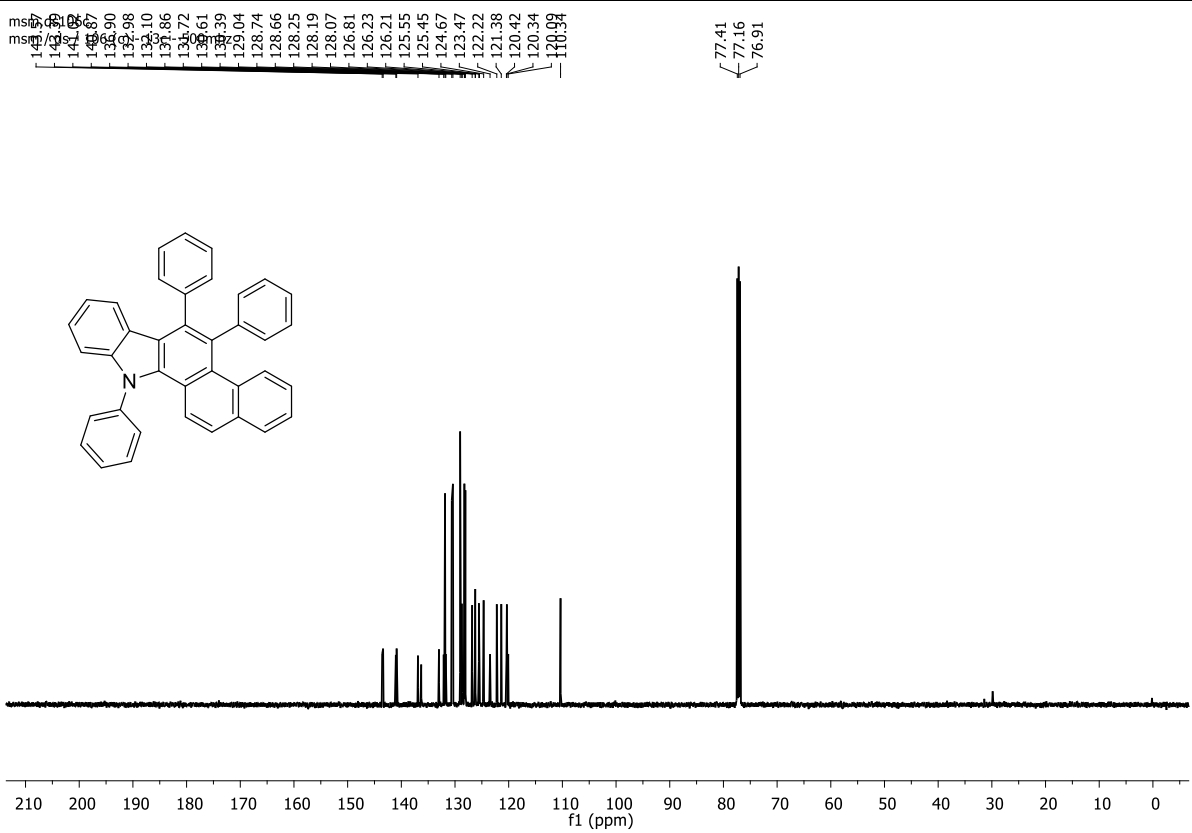



$^1\text{H}$  (400 MHz) and  $^{13}\text{C}$  (101 MHz) NMR of **4d** in  $\text{CDCl}_3$

msm.ds204  
msm.ds204 -1h -400MHz

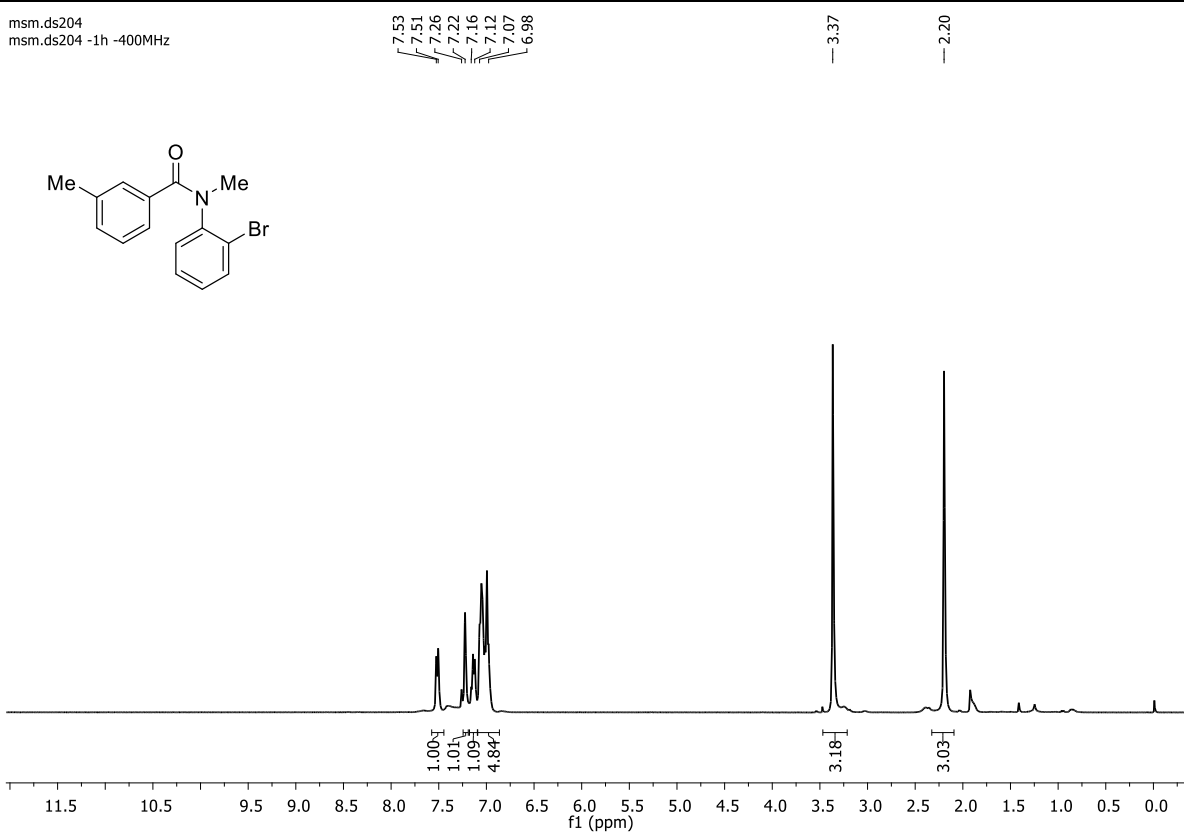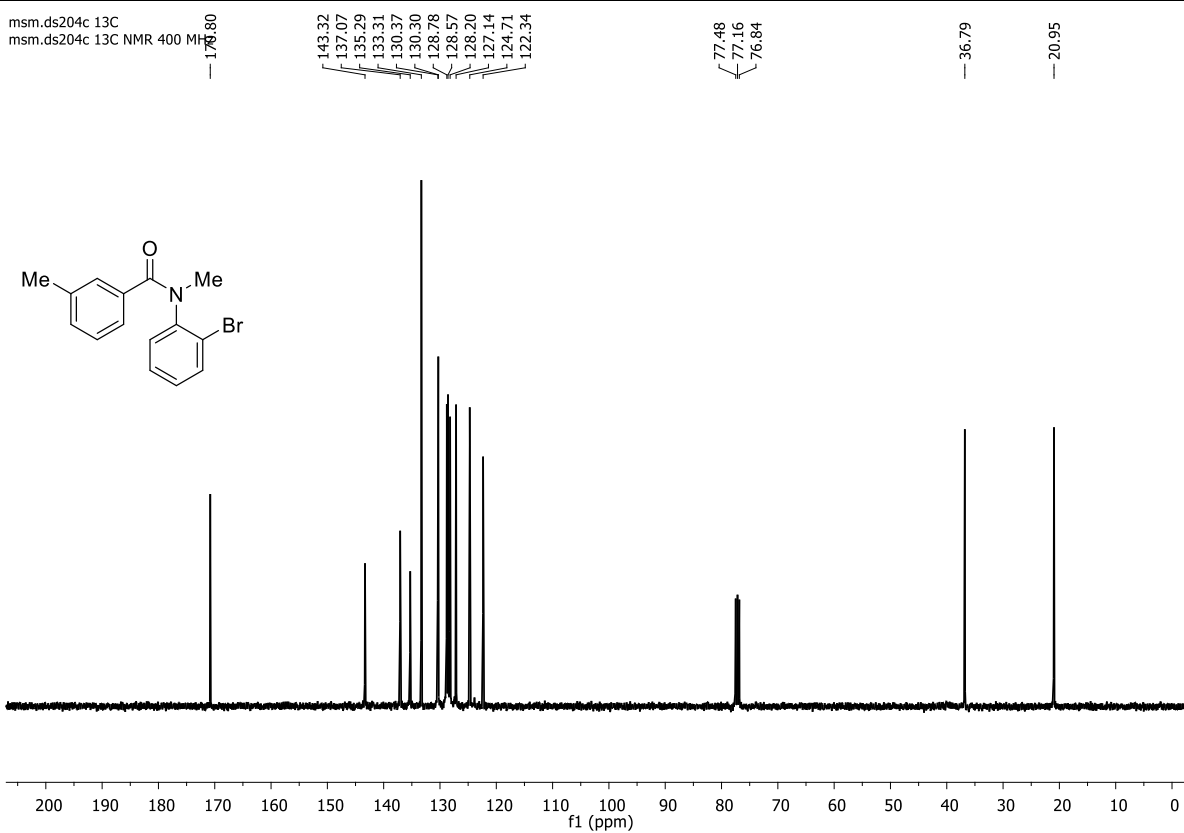

<sup>1</sup>H (500 MHz) and <sup>13</sup>C (126 MHz) NMR of **4e** in CDCl<sub>3</sub>

msm.ds271c  
msm / ds / 271 (c) - 13c - 500mhz

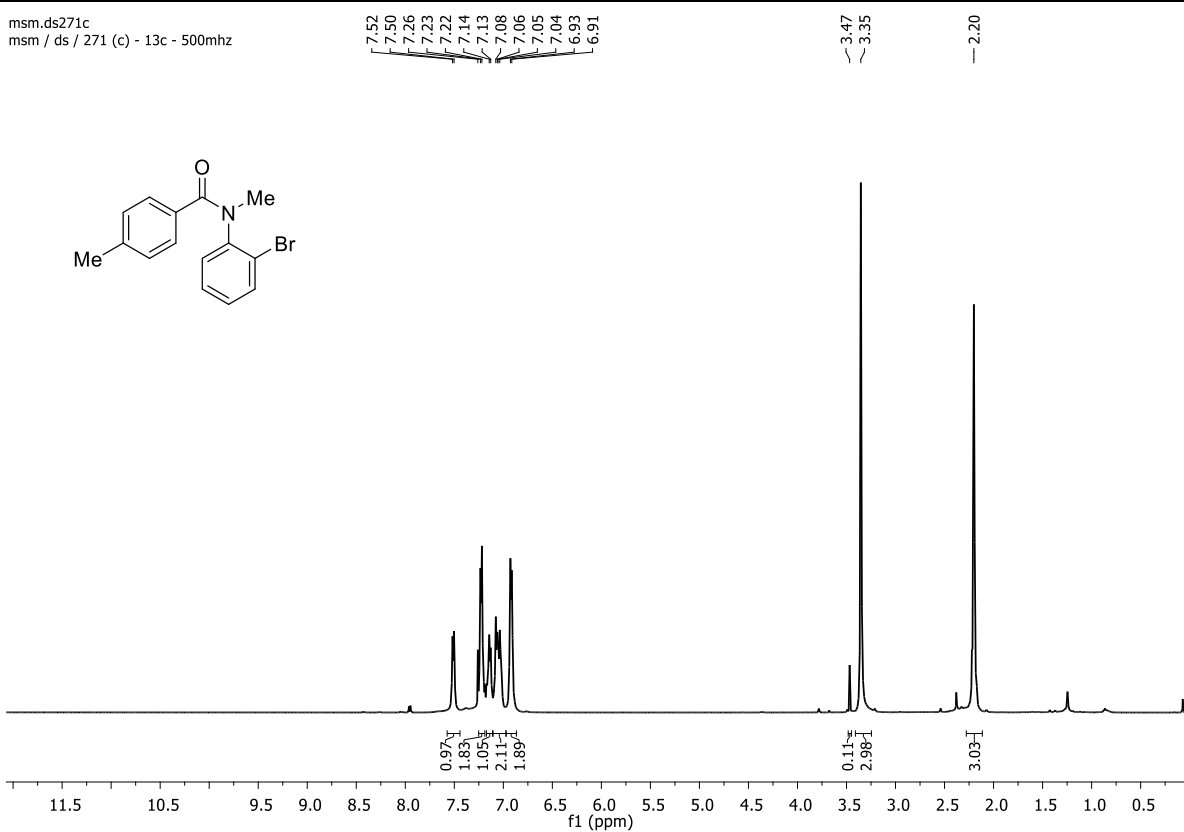

msm.ds271c  
msm / ds / 271 (c) - 13c - 100mhz

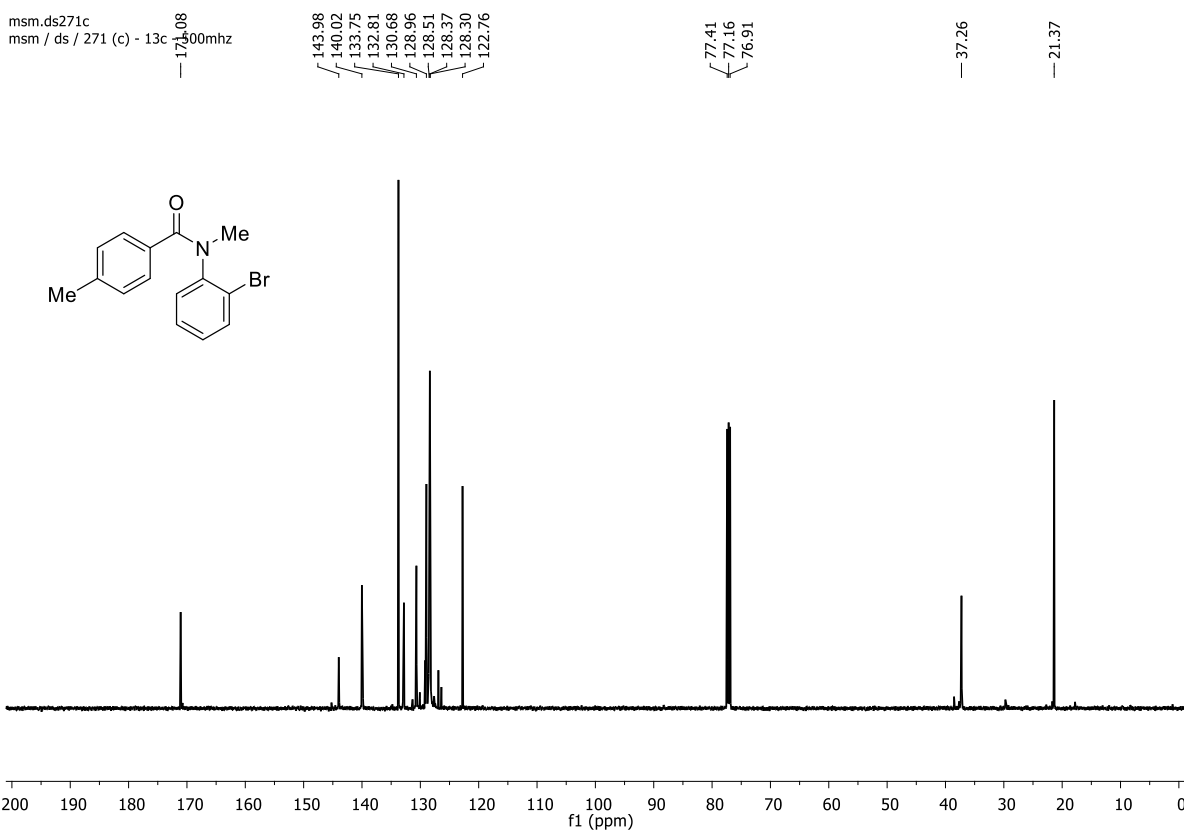

<sup>1</sup>H (400 MHz) and <sup>13</sup>C (126 MHz) NMR of **4f** in CDCl<sub>3</sub>

1H  
msm.ds194-1h- 400MHz

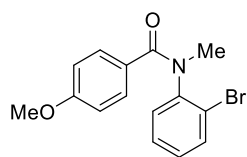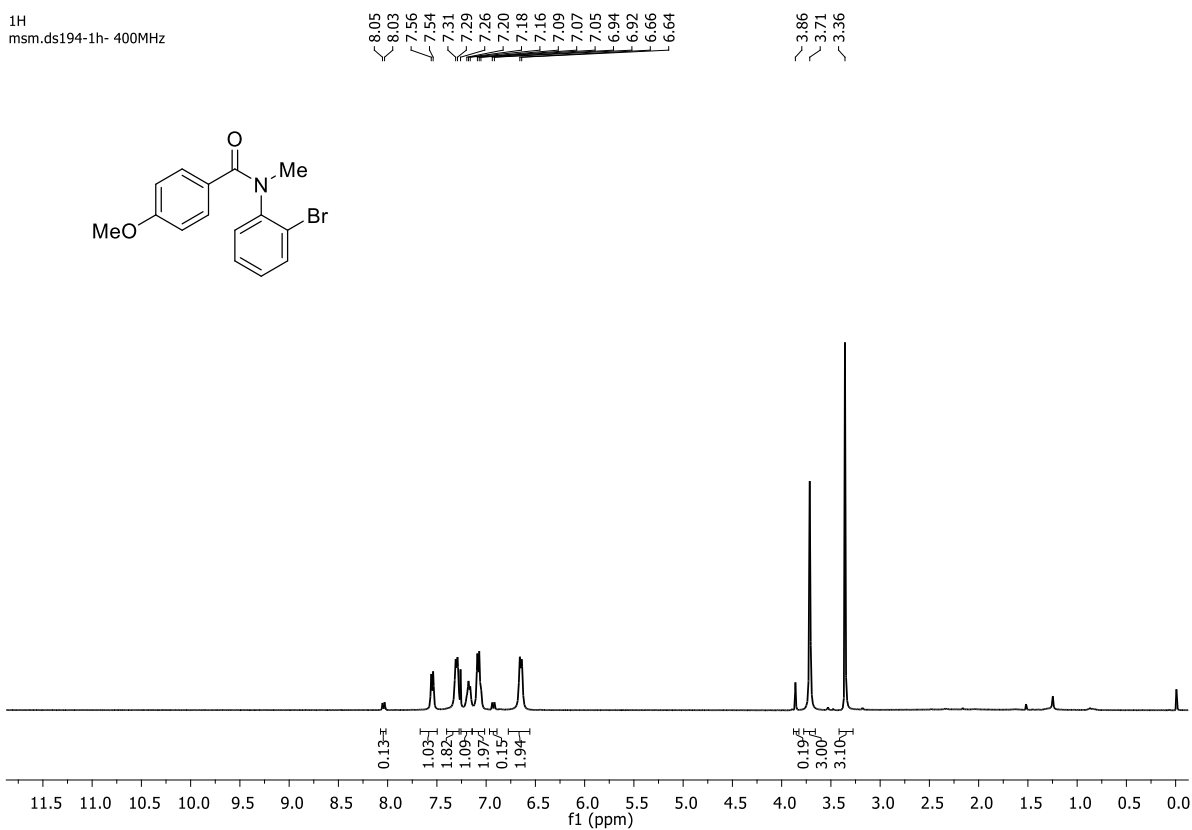

msm.ds194r  
msm / ds / 194 r - 13c - 126mhz

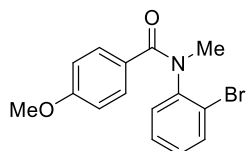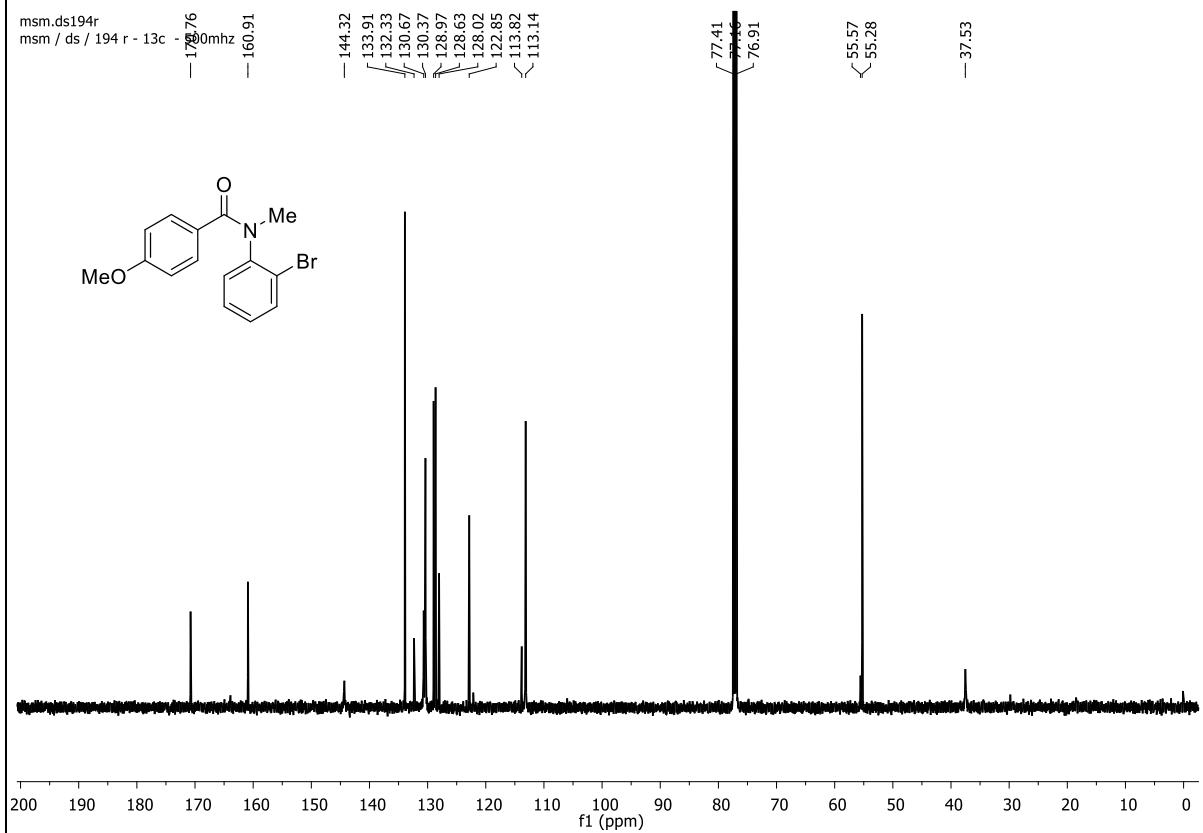

<sup>1</sup>H (400 MHz) and <sup>13</sup>C (101 MHz) NMR of **4g** in CDCl<sub>3</sub>

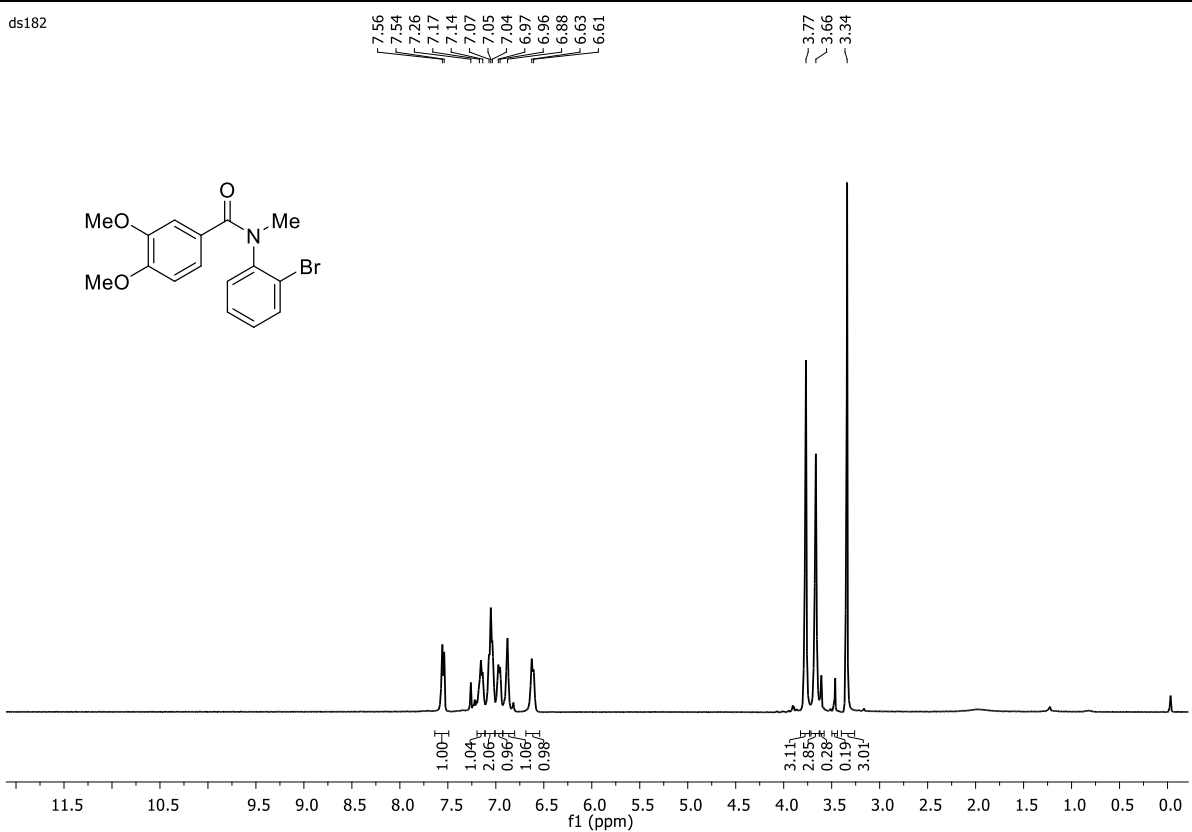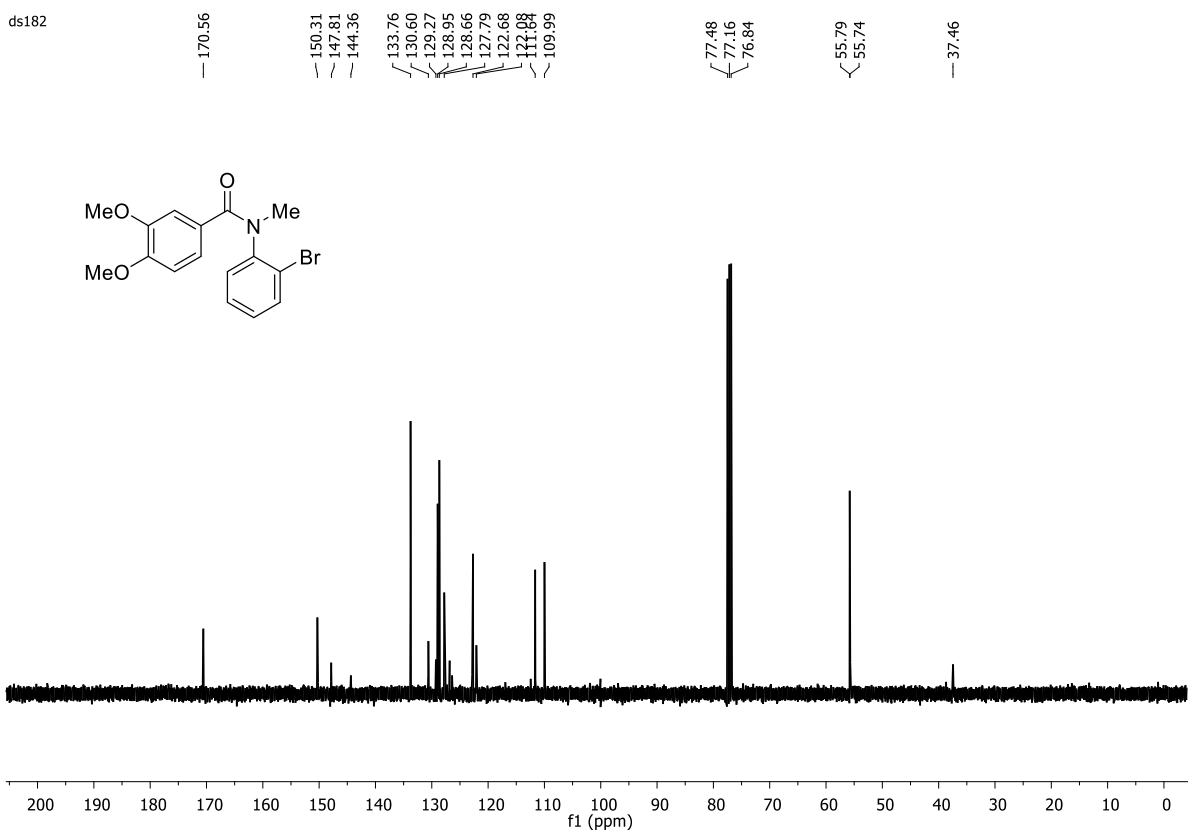

<sup>1</sup>H (400 MHz) and <sup>13</sup>C (101 MHz) NMR of **4h** in CDCl<sub>3</sub>

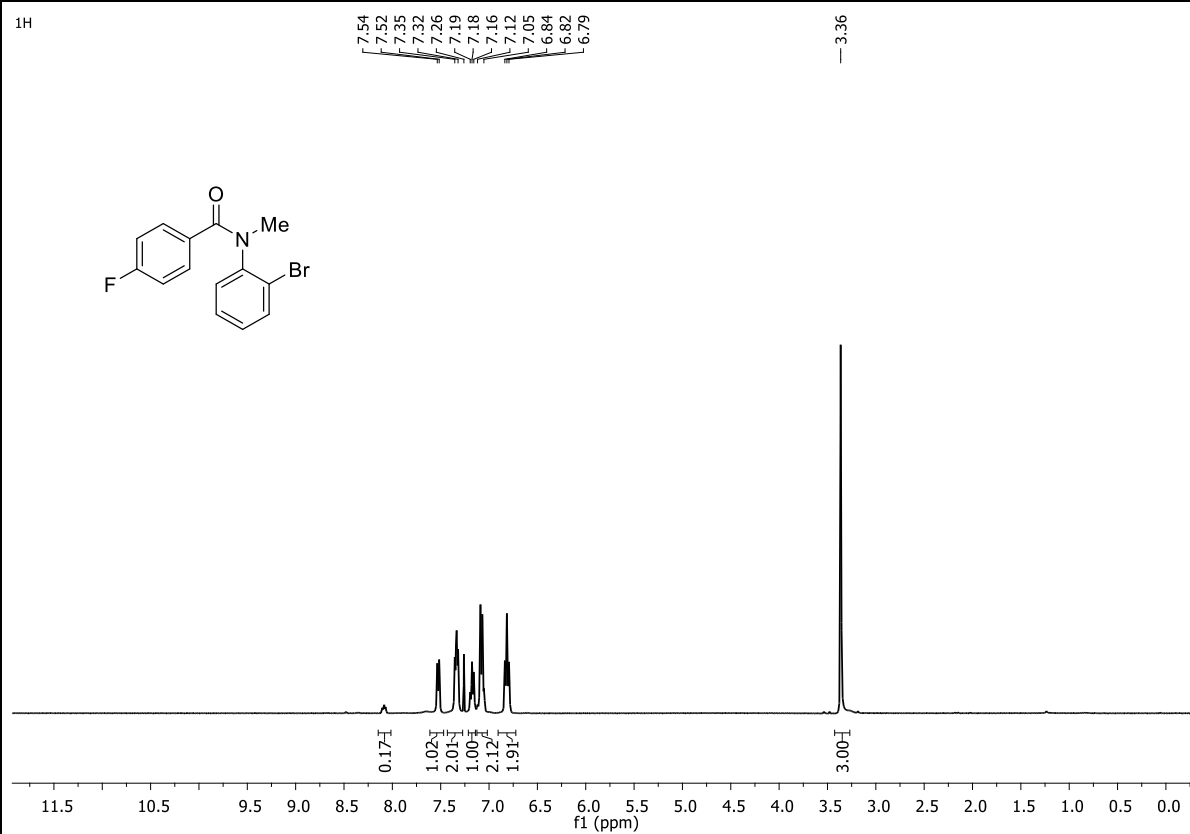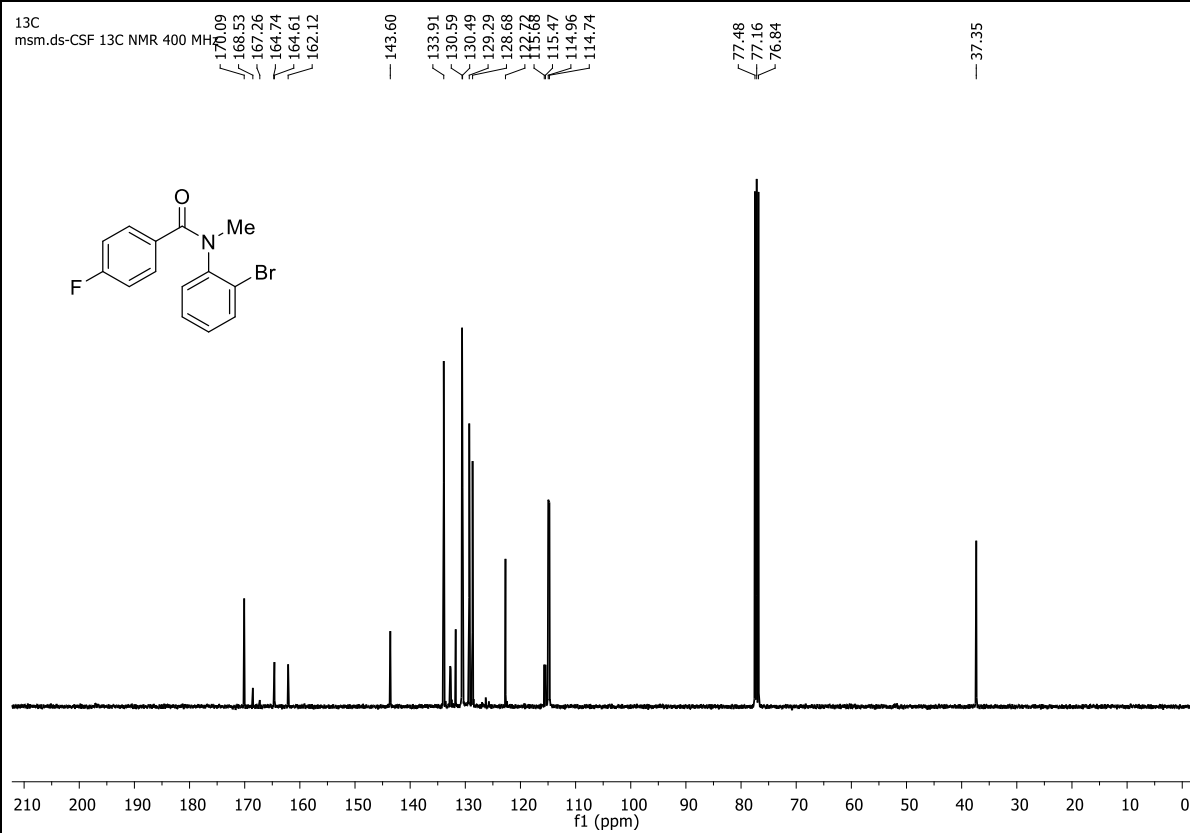

<sup>19</sup>F (470 MHz) NMR of **4h** in CDCl<sub>3</sub>

msm.dscsf2  
msm / ds / csf2 - F19

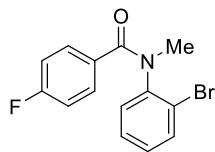

-- -105.52  
-- -109.69

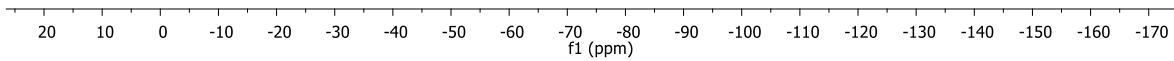

<sup>1</sup>H (500 MHz) and <sup>13</sup>C (126 MHz) NMR of **4i** in CDCl<sub>3</sub>

msm.ds166  
msm / ds / 166 - 1h - 500mhz

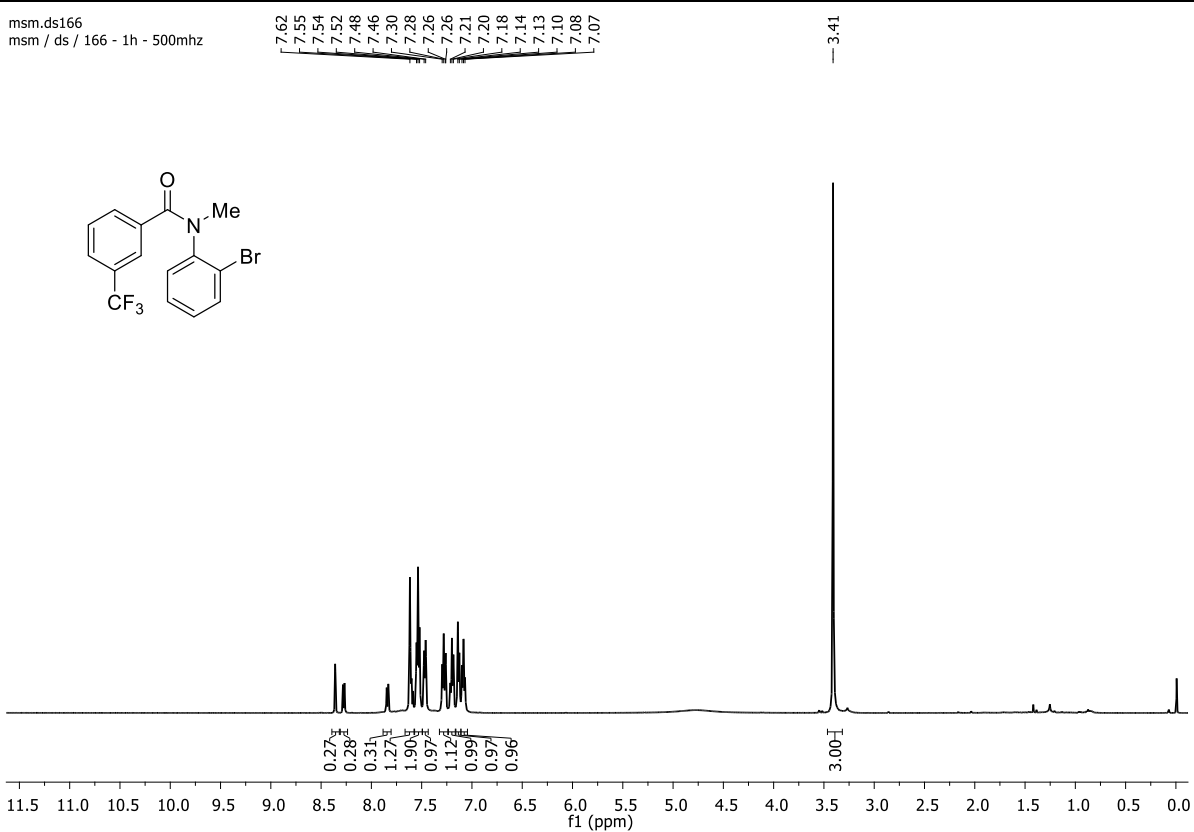

msm.ds166  
msm / ds / 166 - 1h - 500mhz

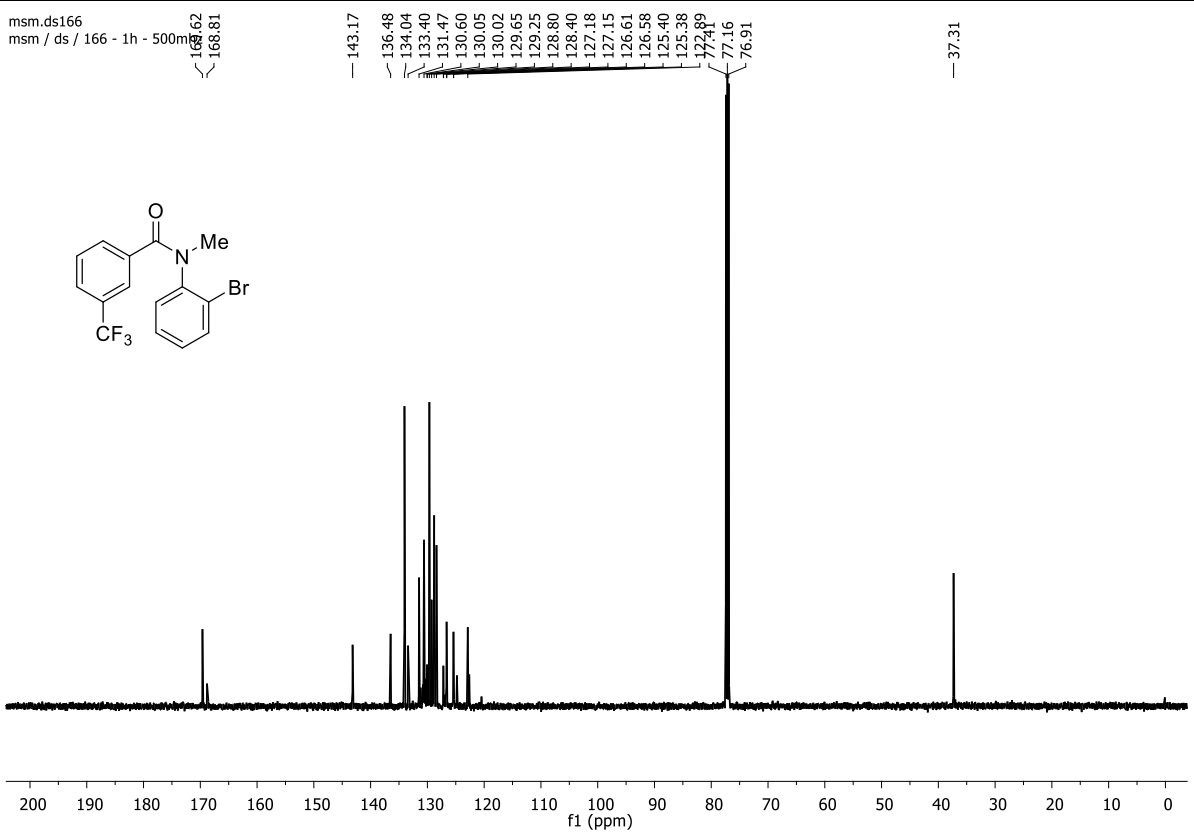

<sup>19</sup>F (471 MHz) NMR of **4i** in CDCl<sub>3</sub>

msm.ds166  
msm / ds / 166 - 19f - F19

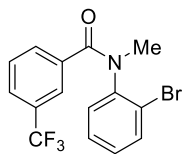

← -102.80  
← -102.98

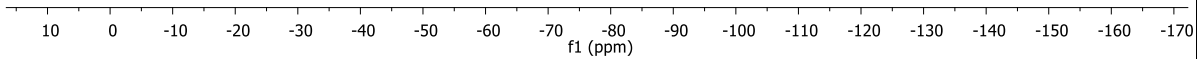



<sup>1</sup>H (400 MHz) and <sup>13</sup>C (101 MHz) NMR of **4j** in CDCl<sub>3</sub>

msm.ds224r  
msm.ds224r-1h-400Mhz

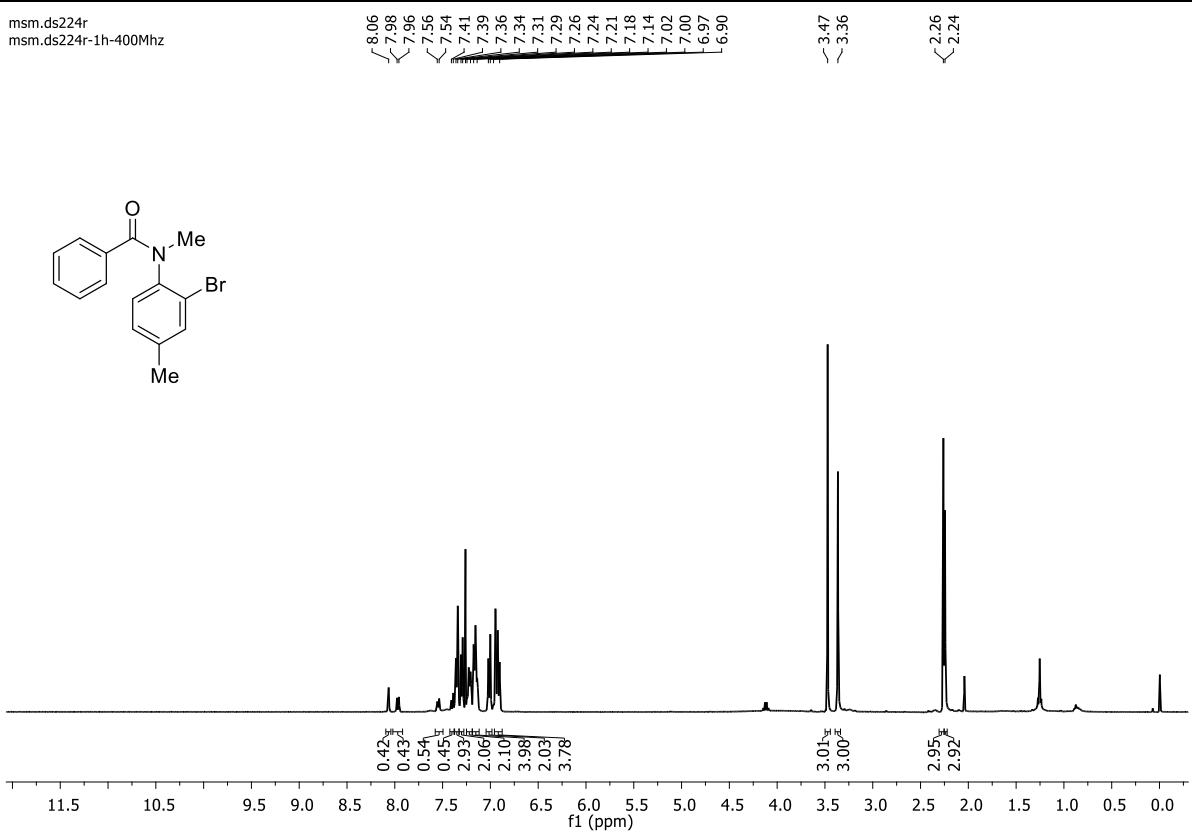

<sup>13</sup>C  
msm.ds224c <sup>13</sup>C NMR 400 MHz

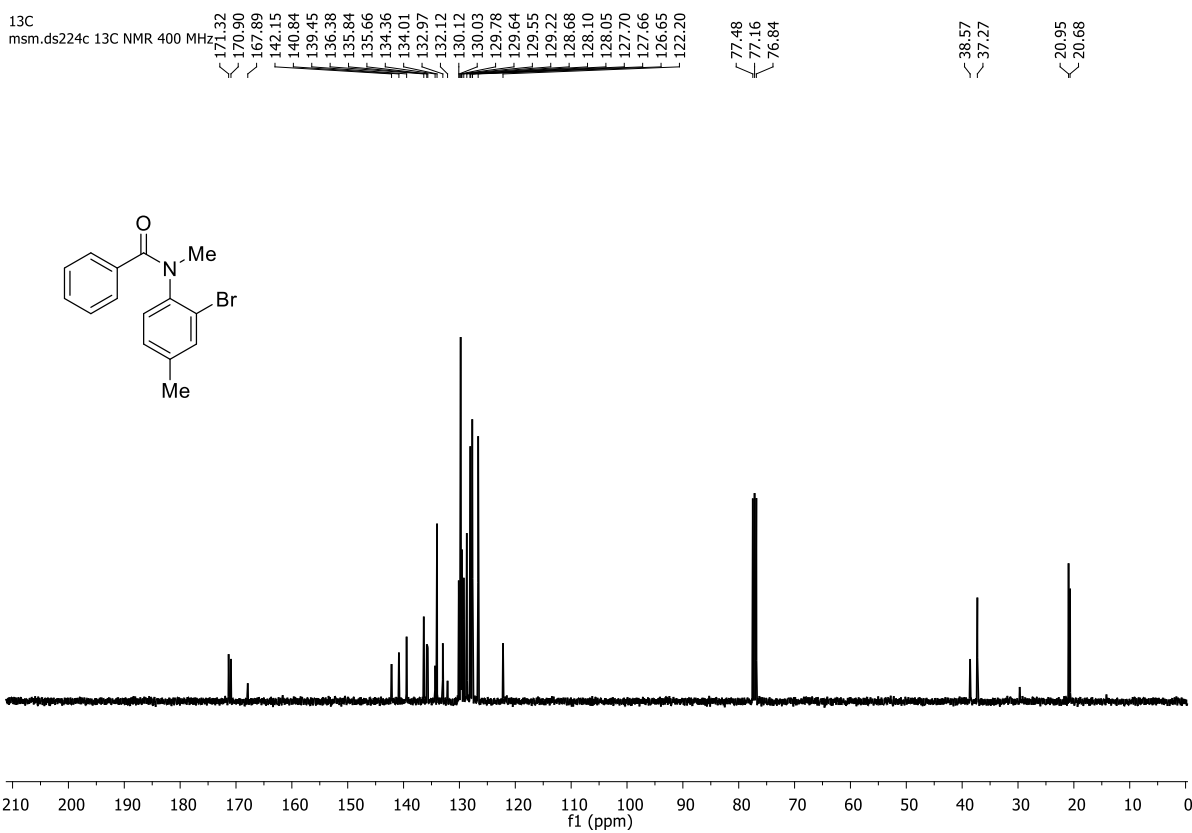

<sup>1</sup>H (500 MHz) and <sup>13</sup>C (126 MHz) NMR of **4k** in CDCl<sub>3</sub>

msm.ds289r  
msm / ds / 289r

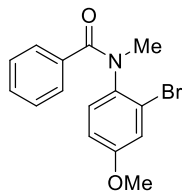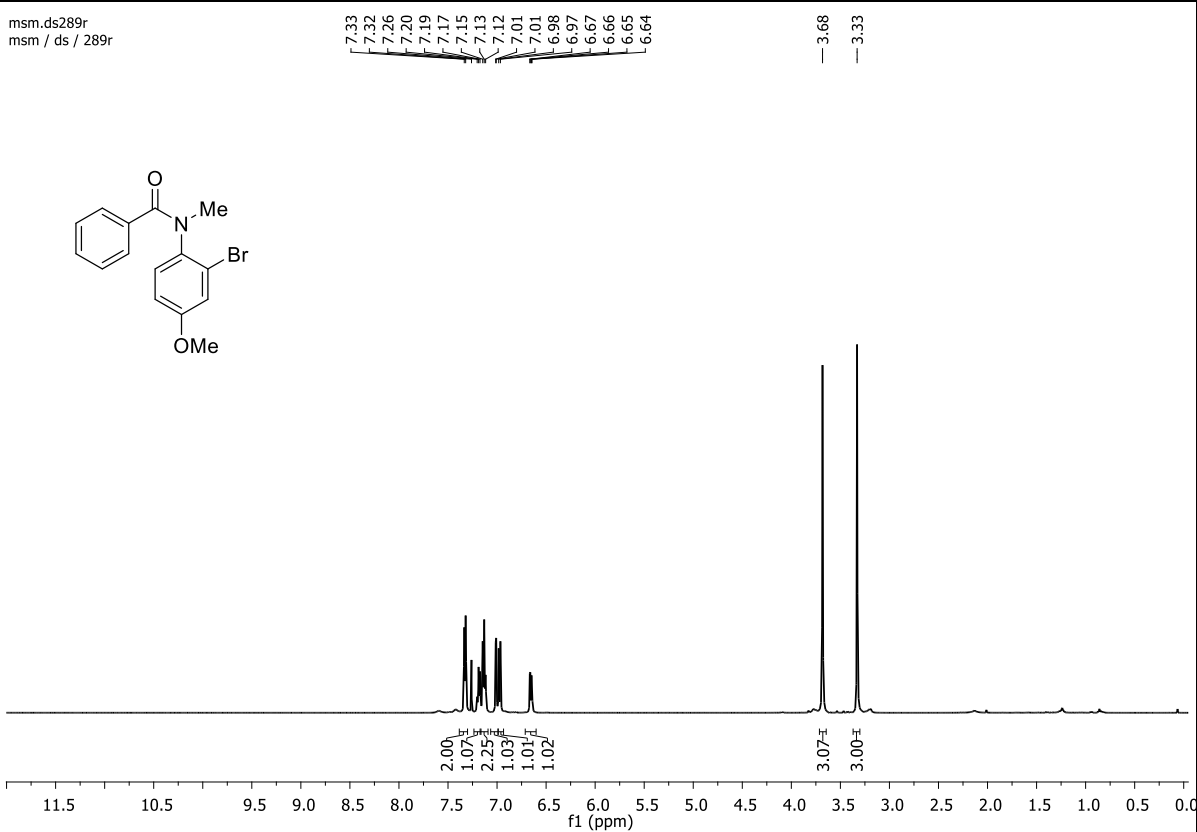

msm.ds289r  
msm / ds / 289 (r)

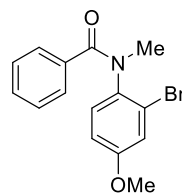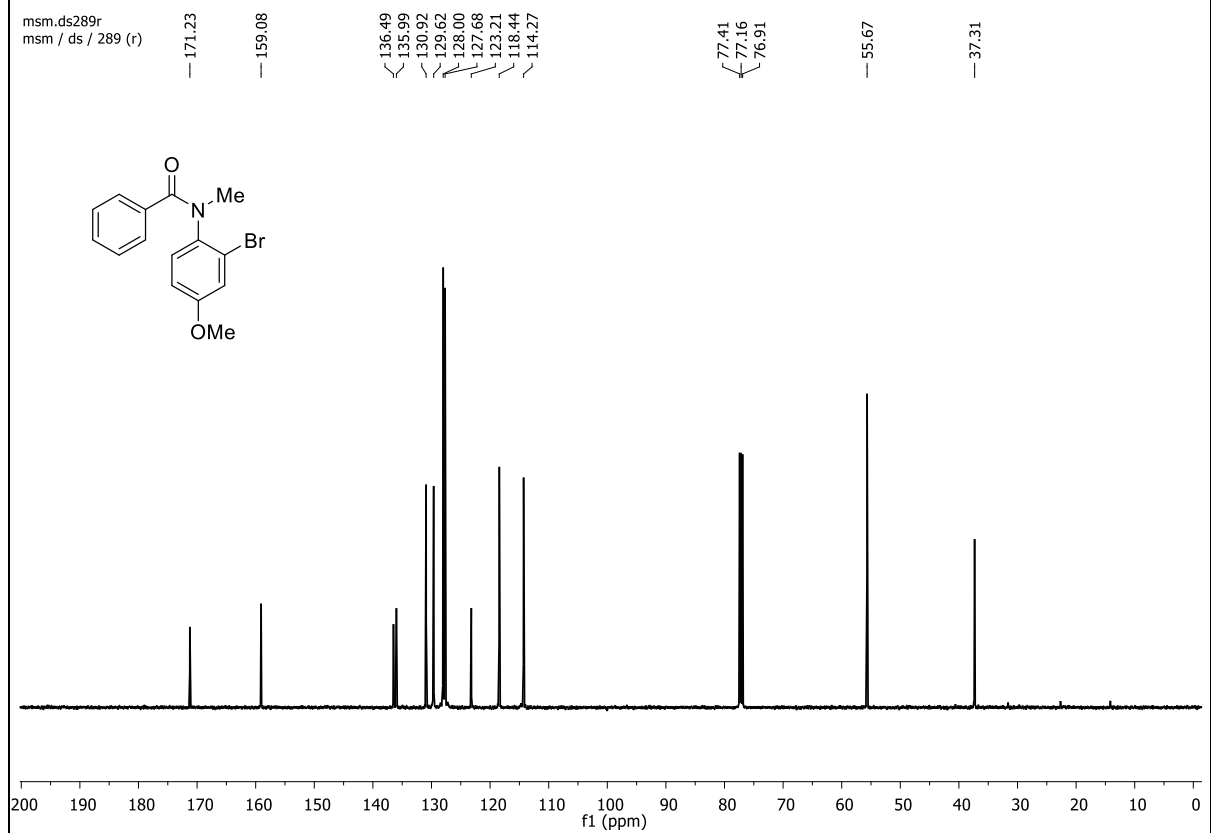

<sup>1</sup>H (400 MHz) and <sup>13</sup>C (101 MHz) NMR of **4l** in CDCl<sub>3</sub>

msm.ds281s  
msm.ds281s 1H NMR - 400 MHz

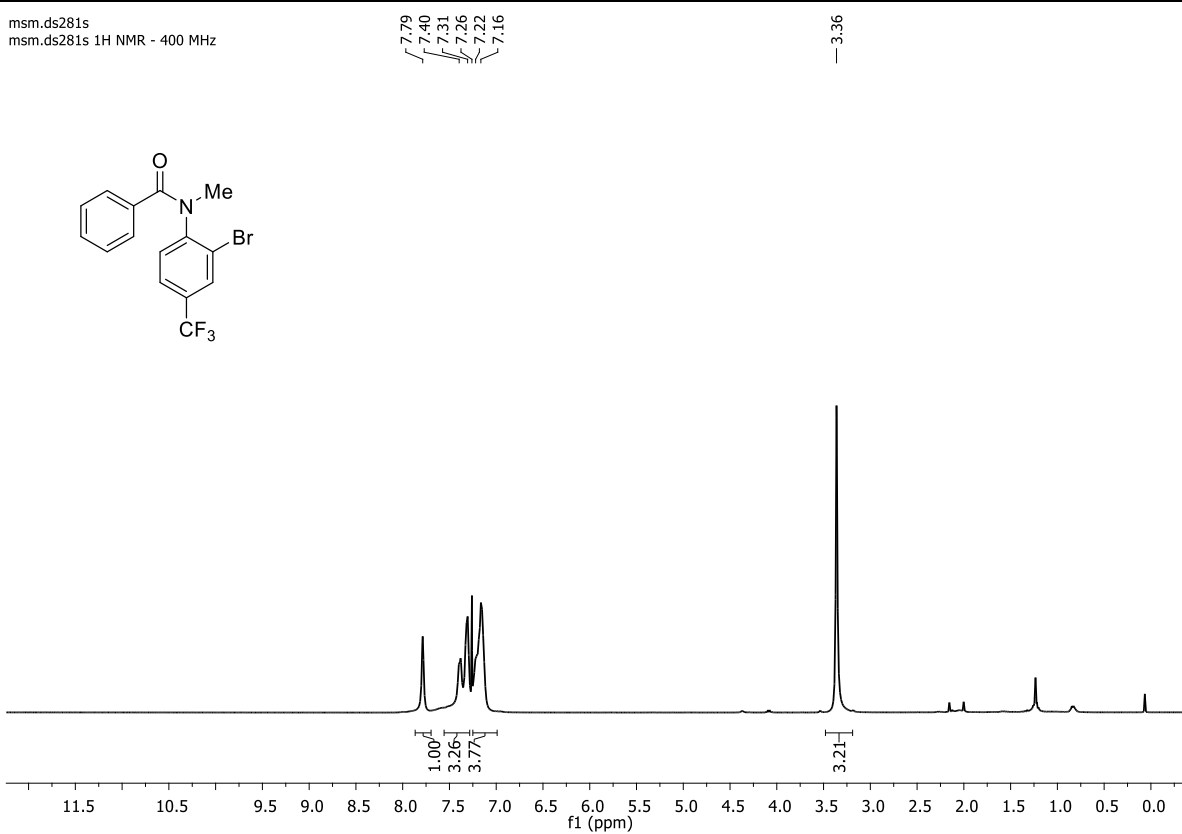

msm.ds281s  
msm.ds281s 13C NMR - 400 MHz

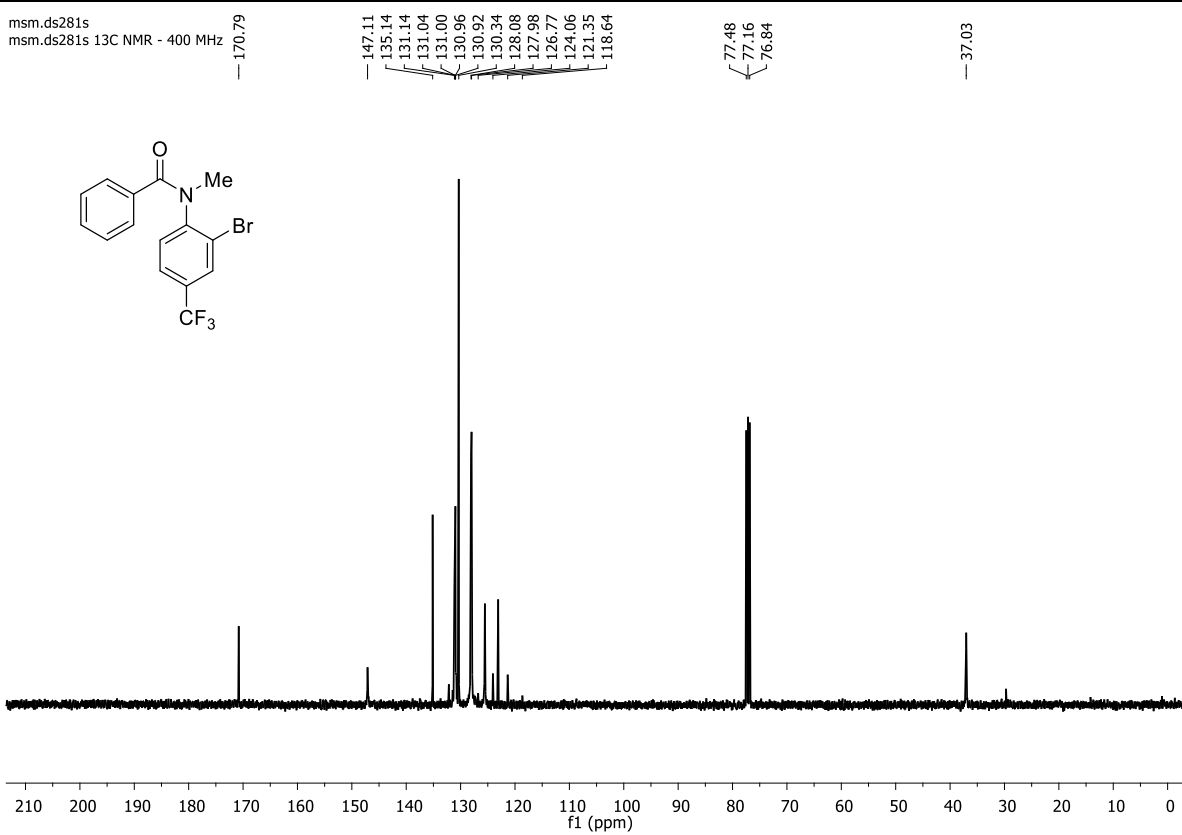

$^{19}\text{F}$  (471 MHz) NMR of **4I** in  $\text{CDCl}_3$

msm.ds281f  
msm / ds / 281 f - 19f - 500mhz

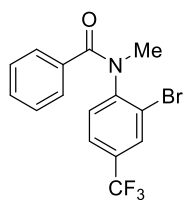

--- -62.69

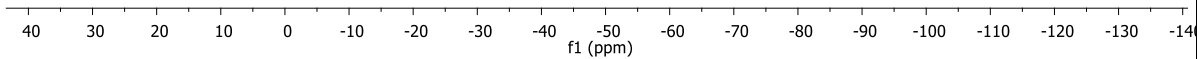

<sup>1</sup>H (500 MHz) and <sup>13</sup>C (126 MHz) NMR of **4n** in CDCl<sub>3</sub>

msm.ds307  
msm / ds / 307

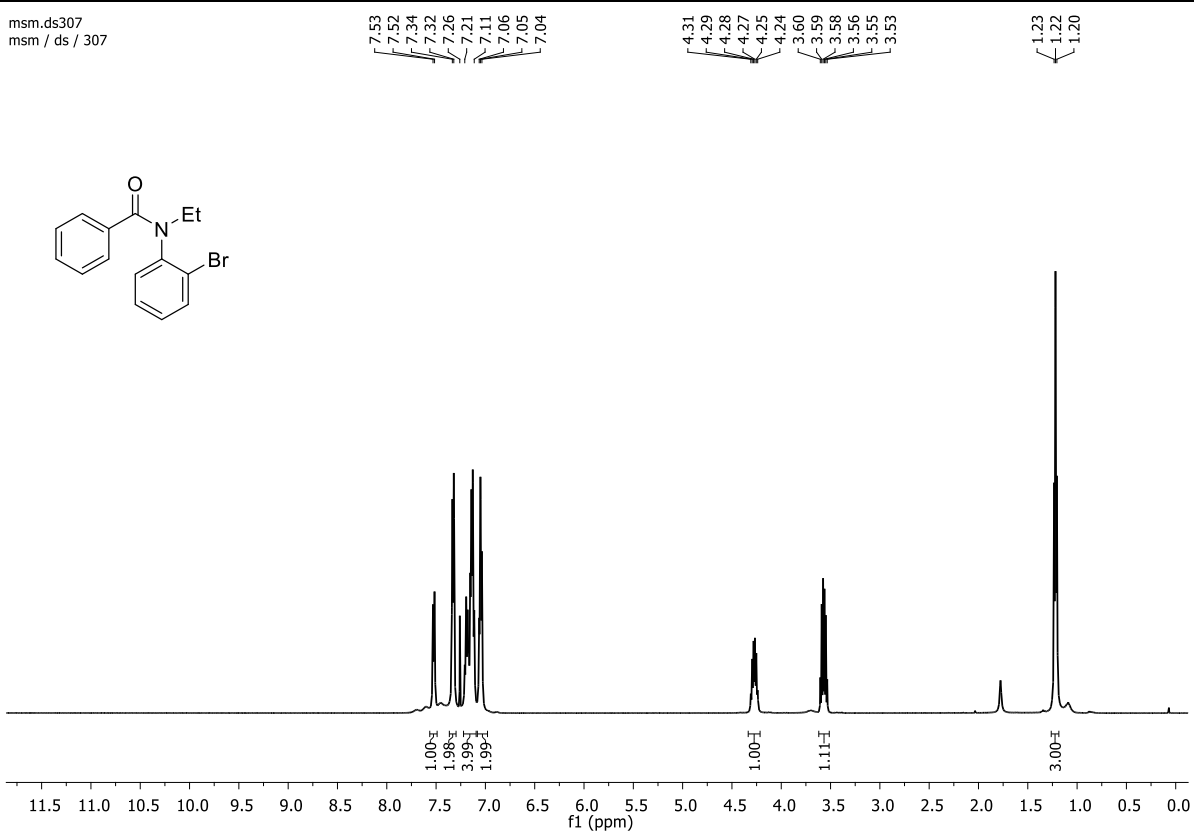

msm.ds307  
msm / ds / 307

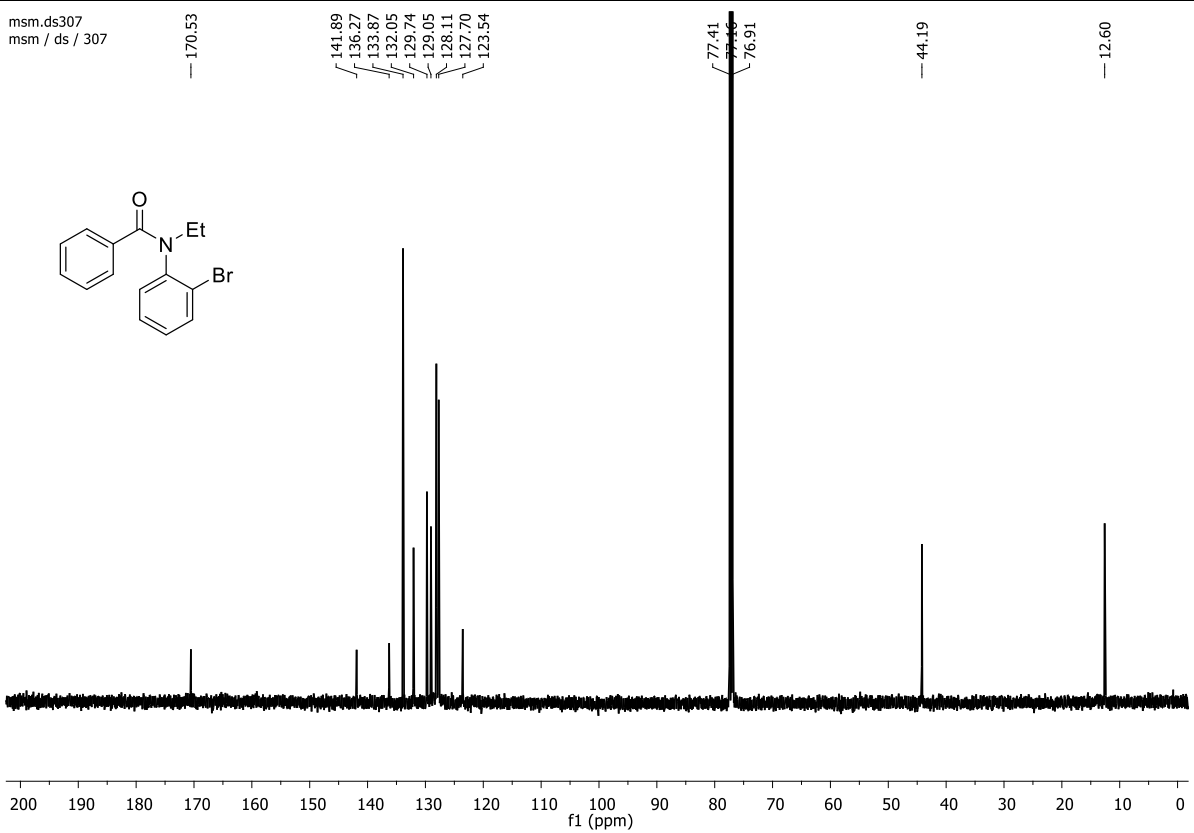

<sup>1</sup>H (400 MHz) and <sup>13</sup>C (126 MHz) NMR of **4o** in CDCl<sub>3</sub>

msm.ds251  
msm.ds251 -1h -400MHz

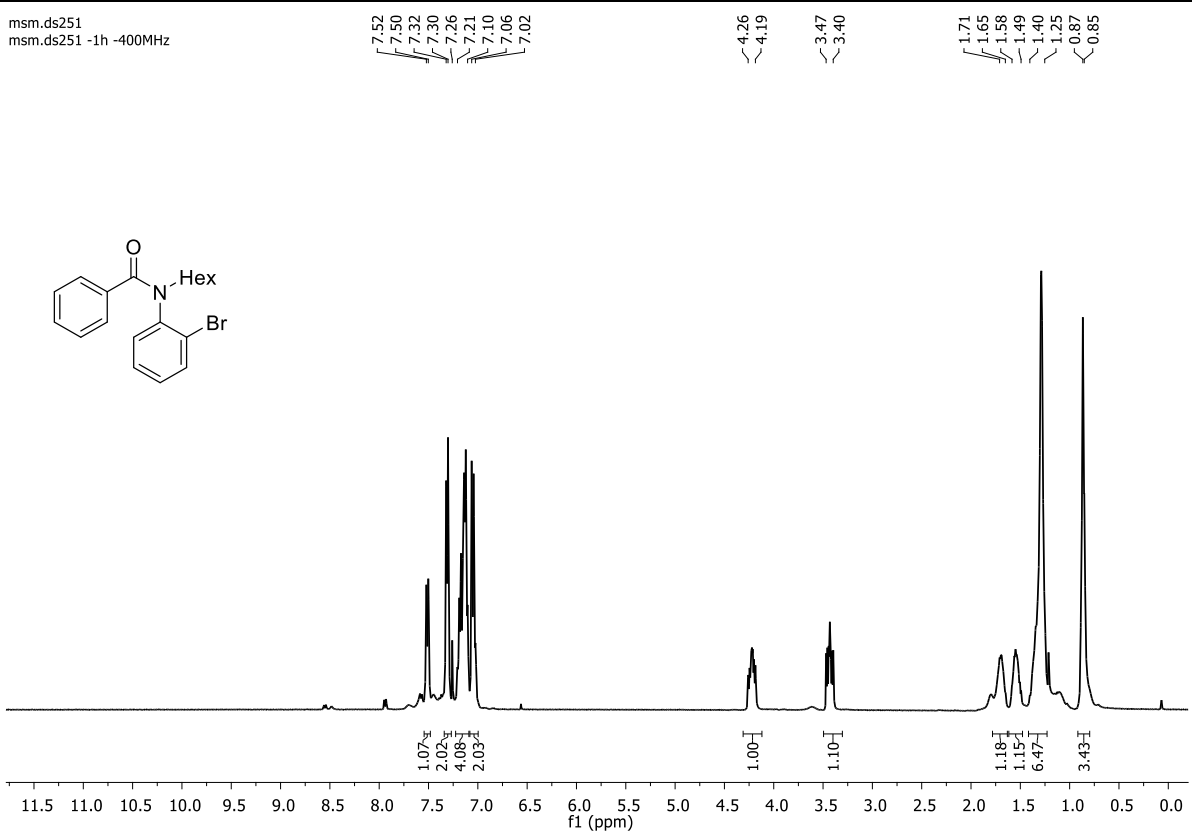

msm.ds251r  
msm / ds / 251 (r) - 13c - 500mhz

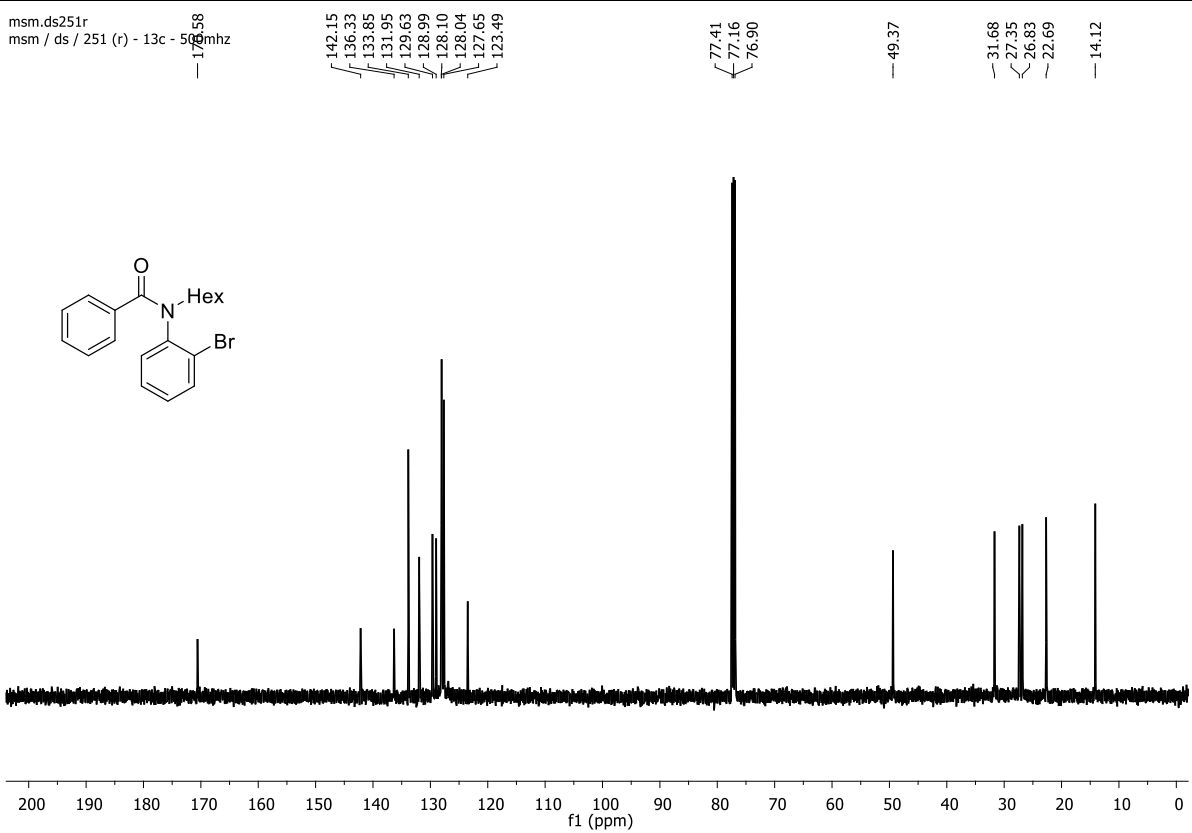

$^1\text{H}$  (400 MHz) and  $^{13}\text{C}$  (126 MHz) NMR of **10q** in  $\text{CDCl}_3$

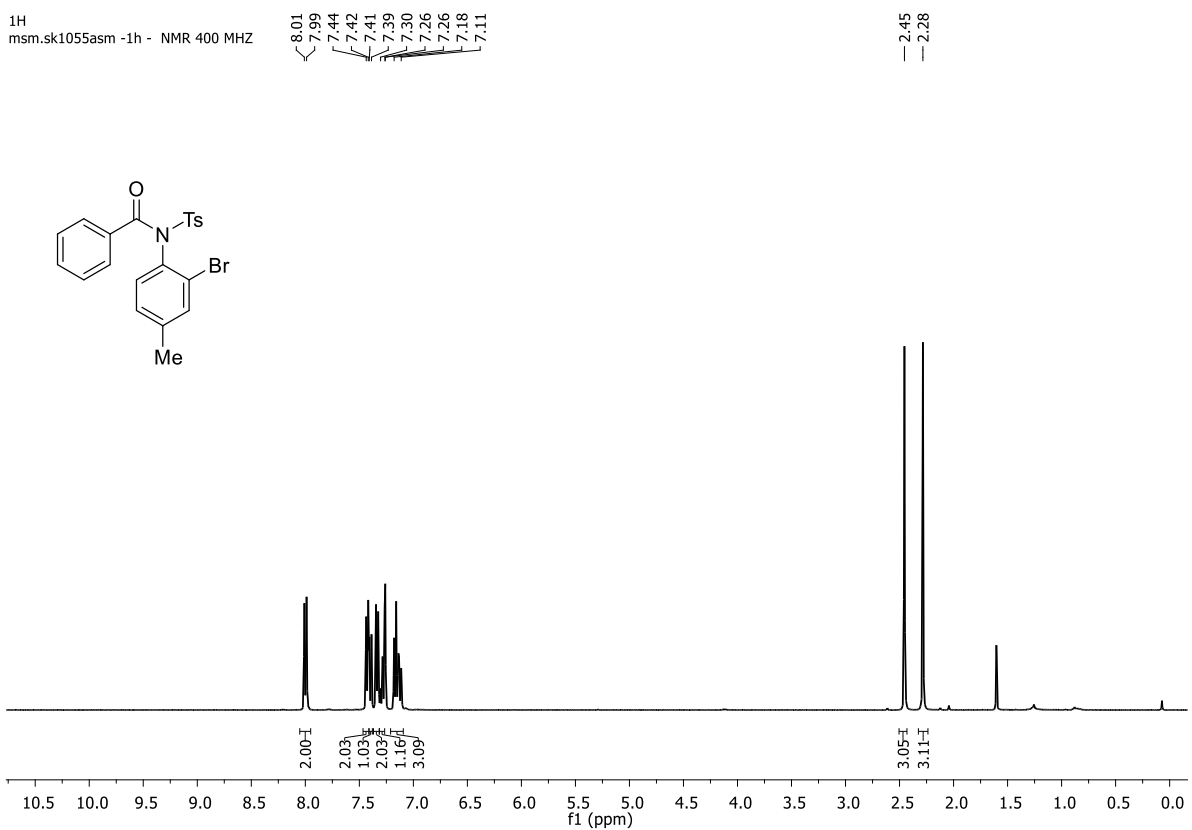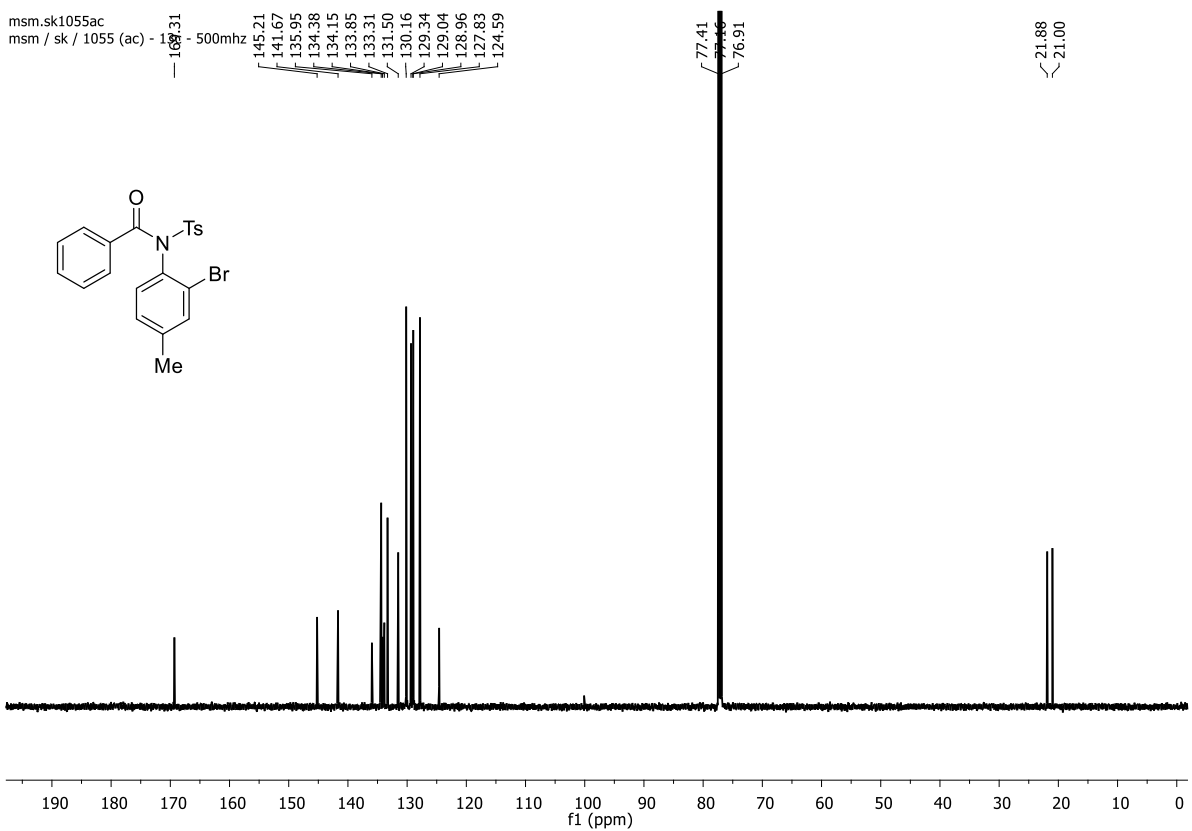

$^1\text{H}$  (400 MHz) and  $^{13}\text{C}$  (101 MHz) NMR of **2a** in  $\text{CDCl}_3$

msm.ds39  
msm.ds39 1H-400mhz

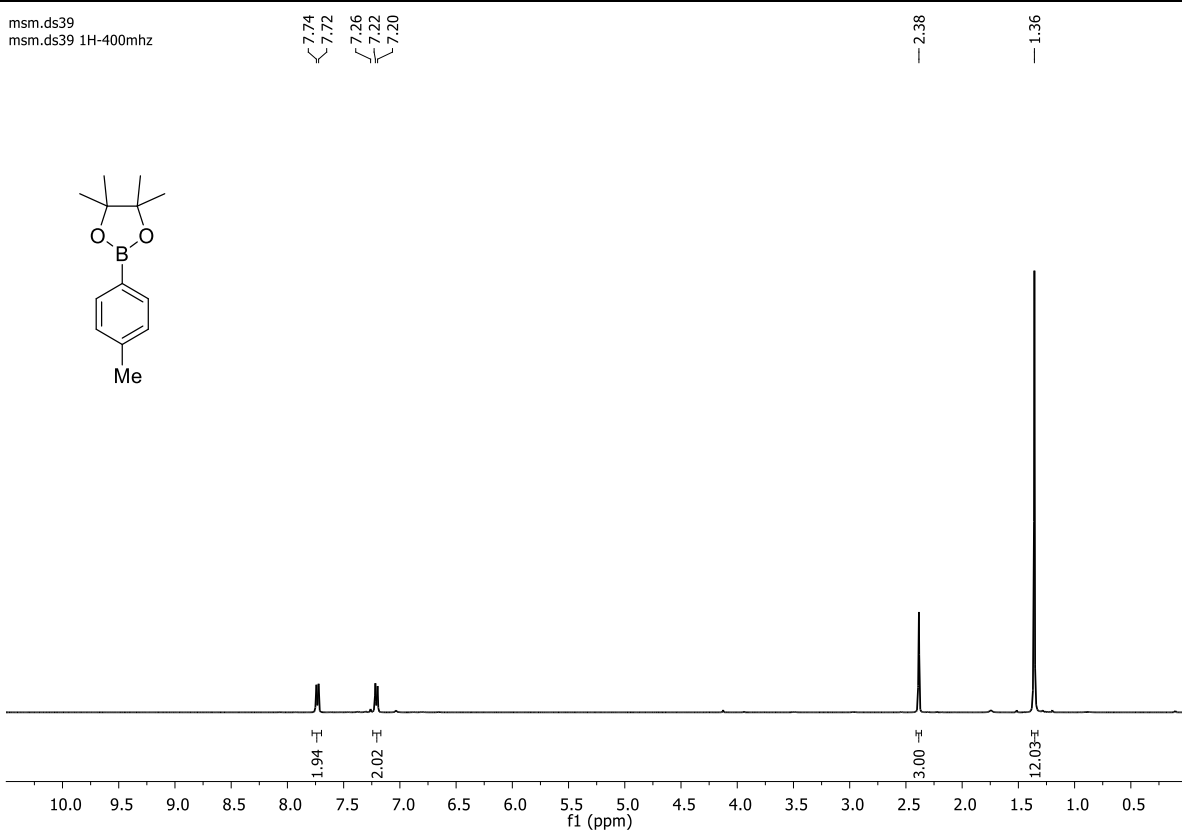

msm.ds39  
msm.ds39 13C-400mhz

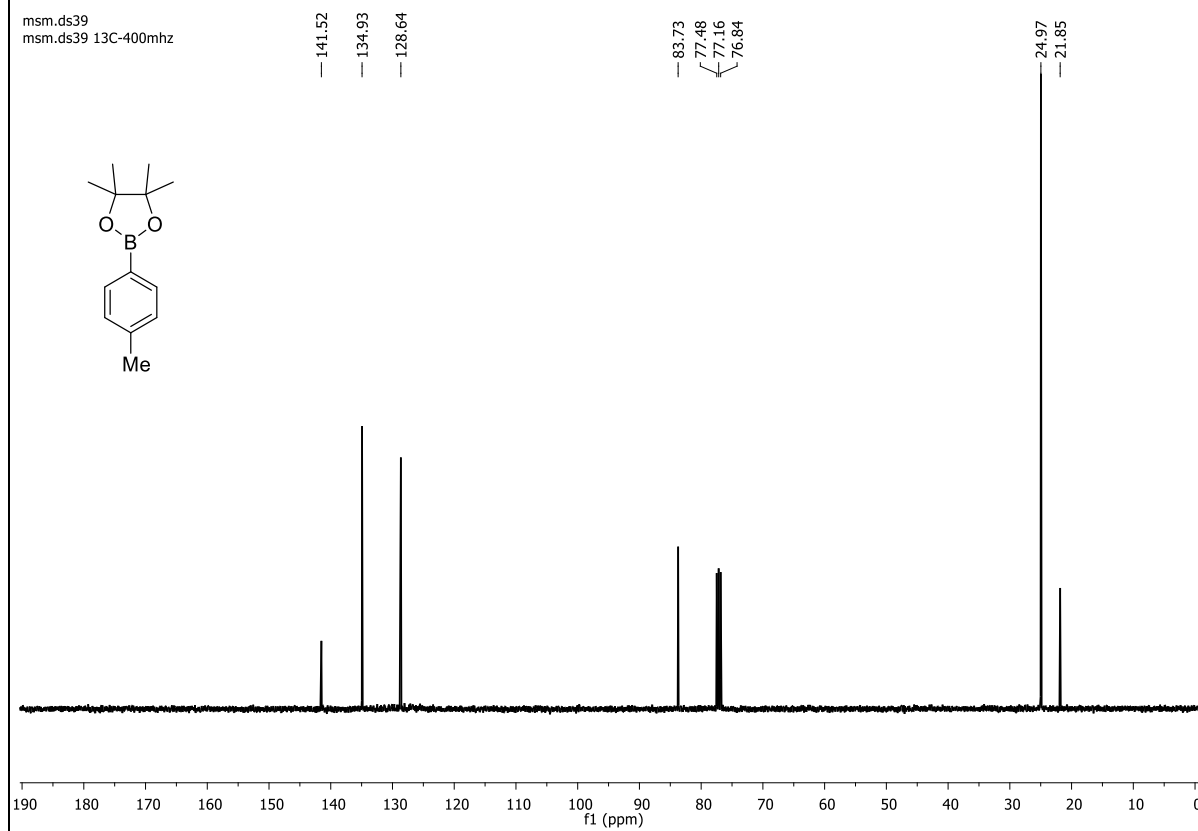



<sup>11</sup>B (160 MHz) NMR of **2a** in CDCl<sub>3</sub>

msm.ds39B  
msm / ds / 39 (n) - 11B -500mhz

— 31.00

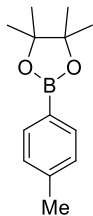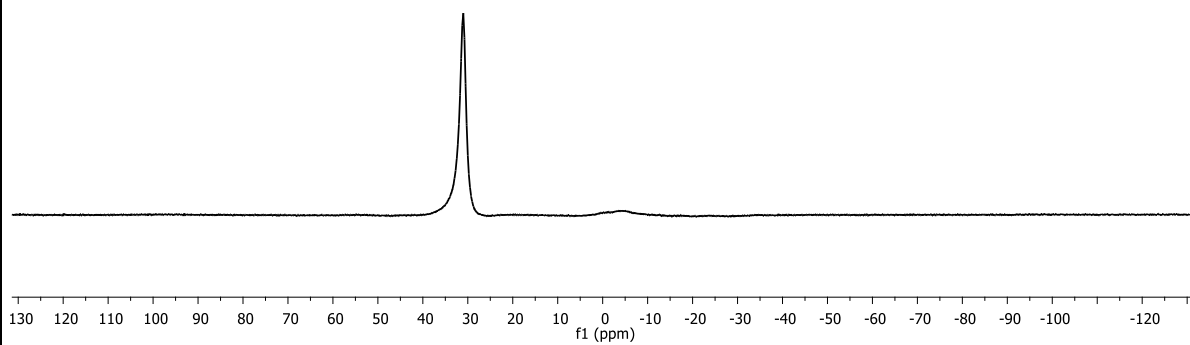

$^1\text{H}$  (400 MHz) and  $^{13}\text{C}$  (101 MHz) NMR of **2b** in  $\text{CDCl}_3$

$^1\text{H}$   
msm.ds43r 1H nmr 400MHz

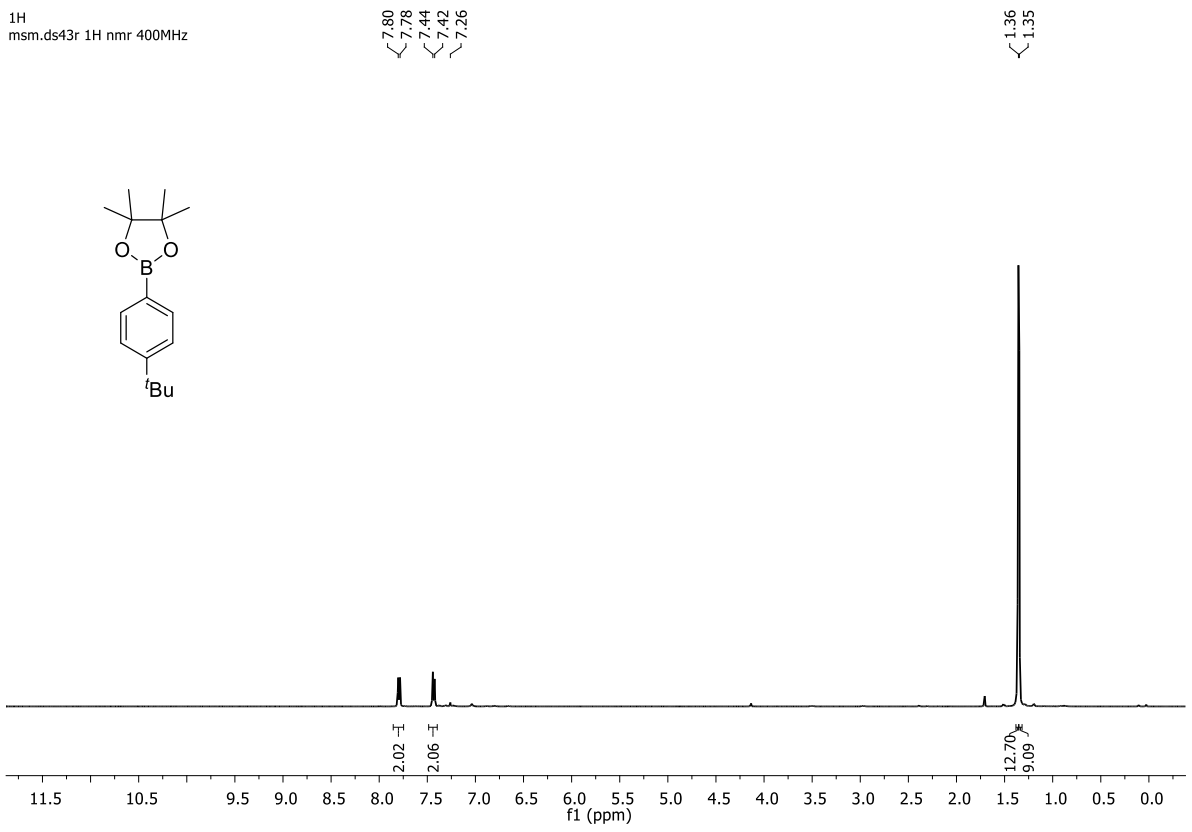

$^{13}\text{C}$   
msm.ds43r 13C nmr 400MHz

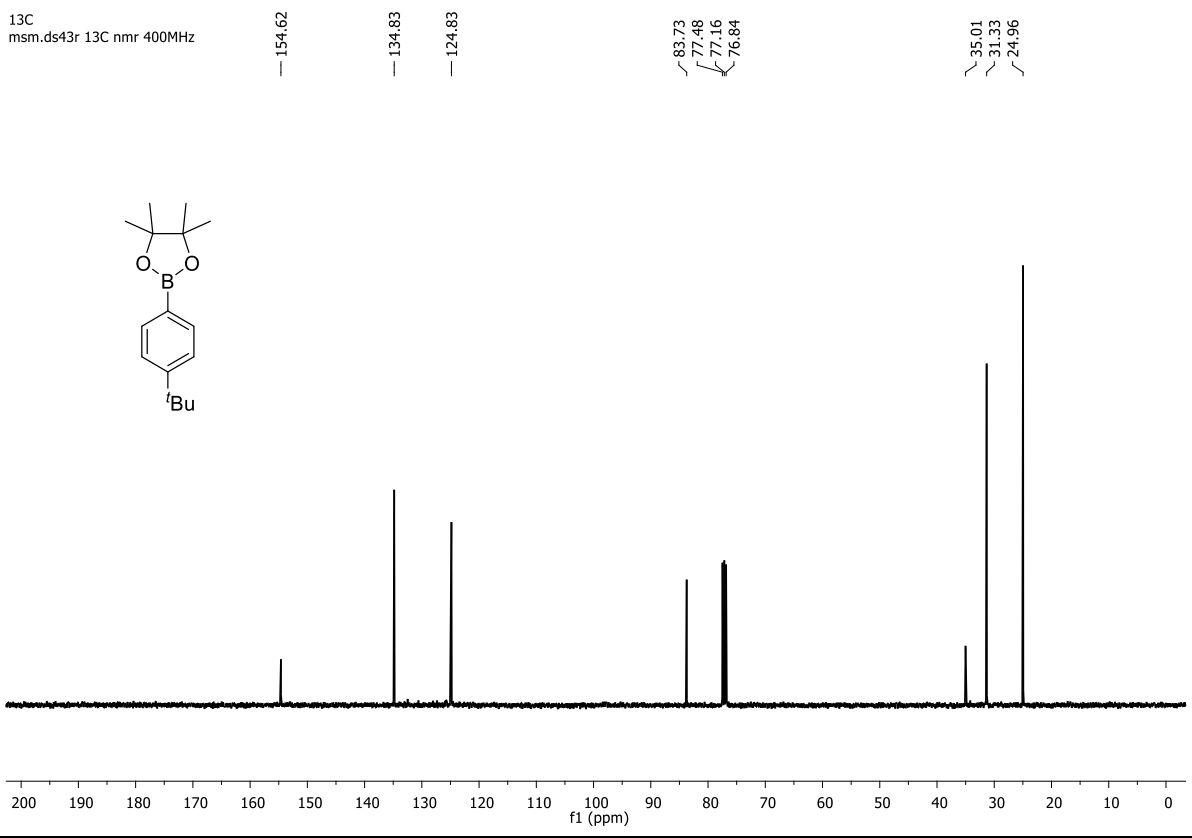

<sup>11</sup>B(160 MHz) NMR of **2b** in CDCl<sub>3</sub>

msm.ds43b  
msm / ds / 43b - 11B-500mhz

31.00  
|

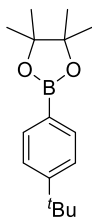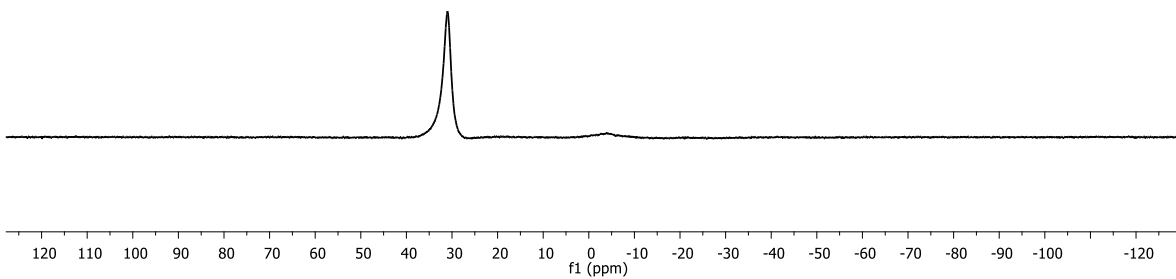

<sup>1</sup>H (400 MHz) and <sup>13</sup>C (126 MHz) NMR of **2c** in CDCl<sub>3</sub>

<sup>1</sup>H  
msm.ds53 -1h- 400mhz

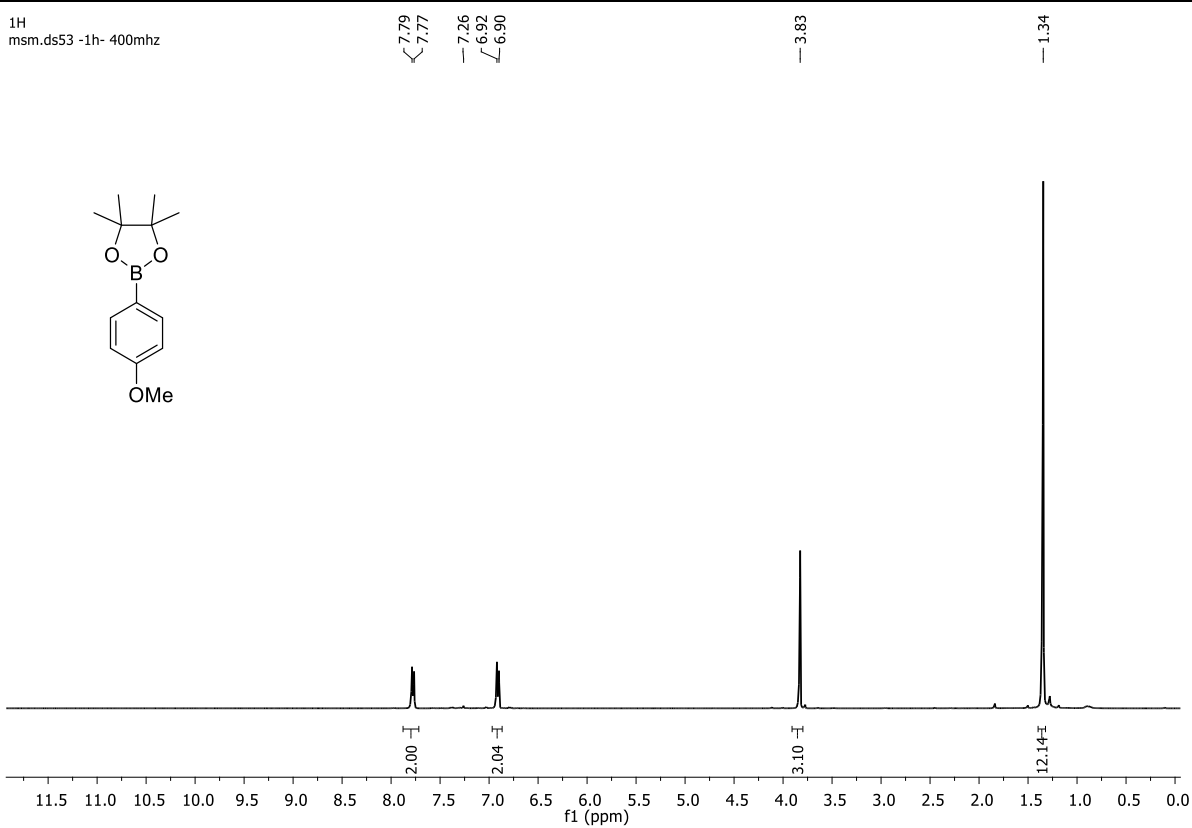

<sup>13</sup>C  
msm / ds / 53c - 13c - 500mhz

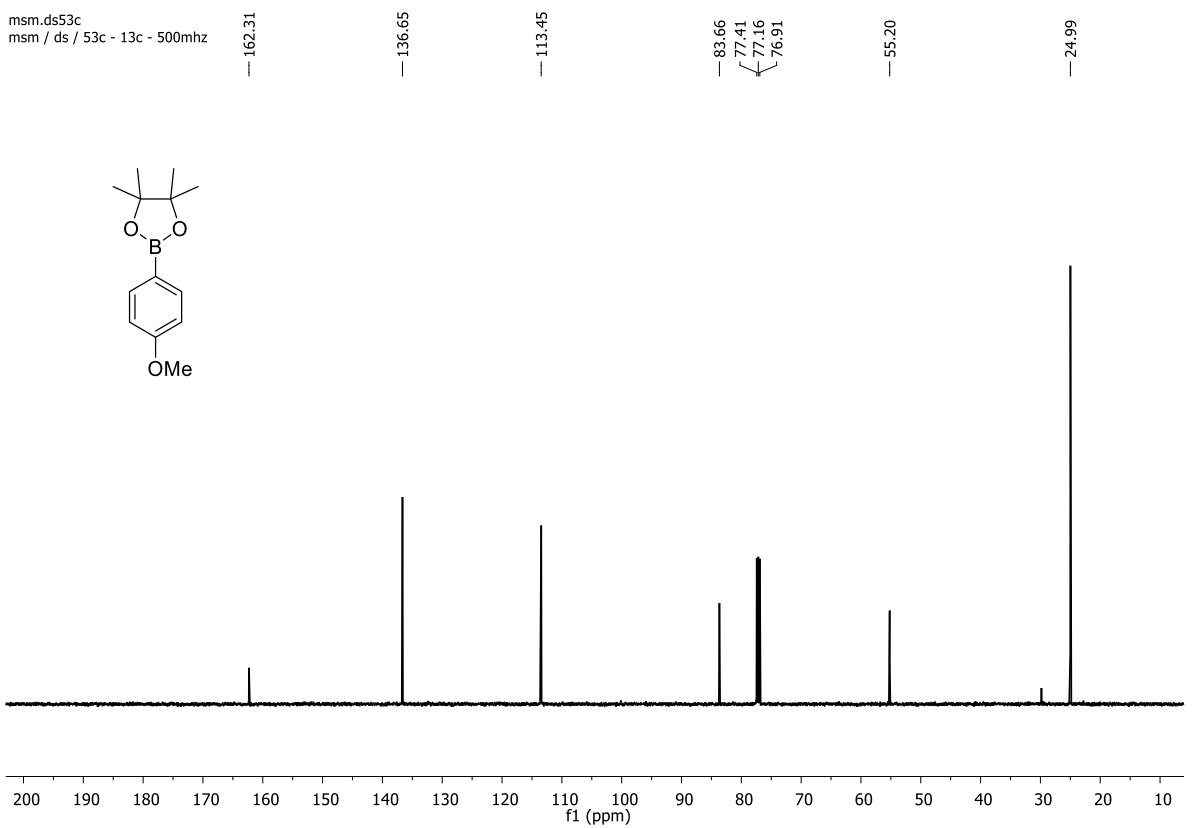

<sup>11</sup>B (160 MHz) NMR of **2c** in CDCl<sub>3</sub>

msm.ds53r boron  
msm / ds / 53 r - 11B-500mhz

30.79  
|

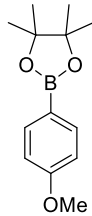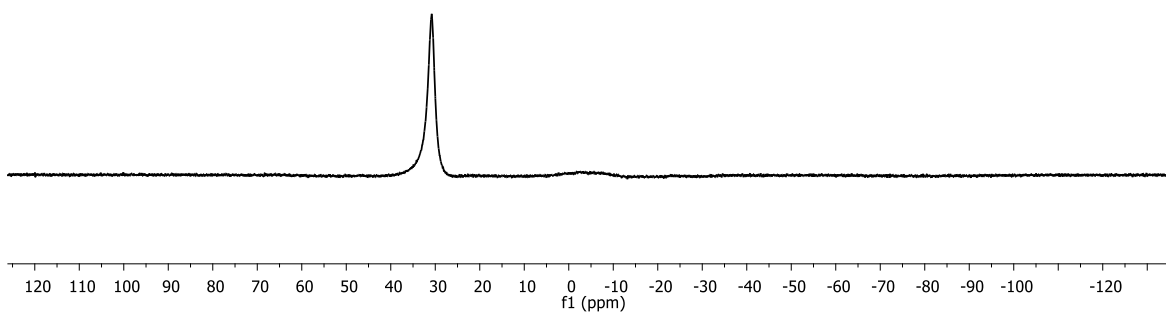

<sup>1</sup>H (400 MHz) and <sup>13</sup>C (126 MHz) NMR of **2d** in CDCl<sub>3</sub>

1H  
msm.ds61b-1h- 400mhz

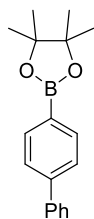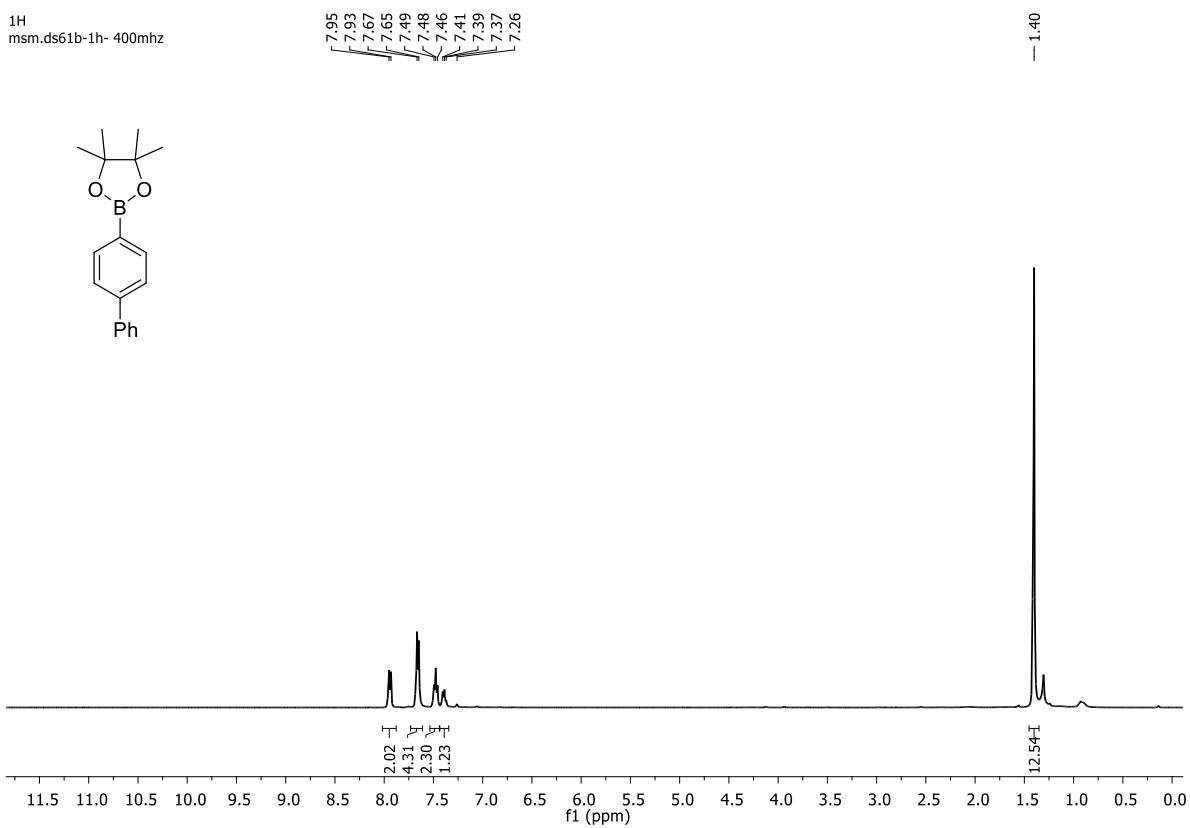

msm.ds61p  
msm / ds / 61 - p - 1h - 500mhz

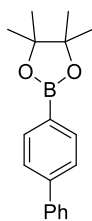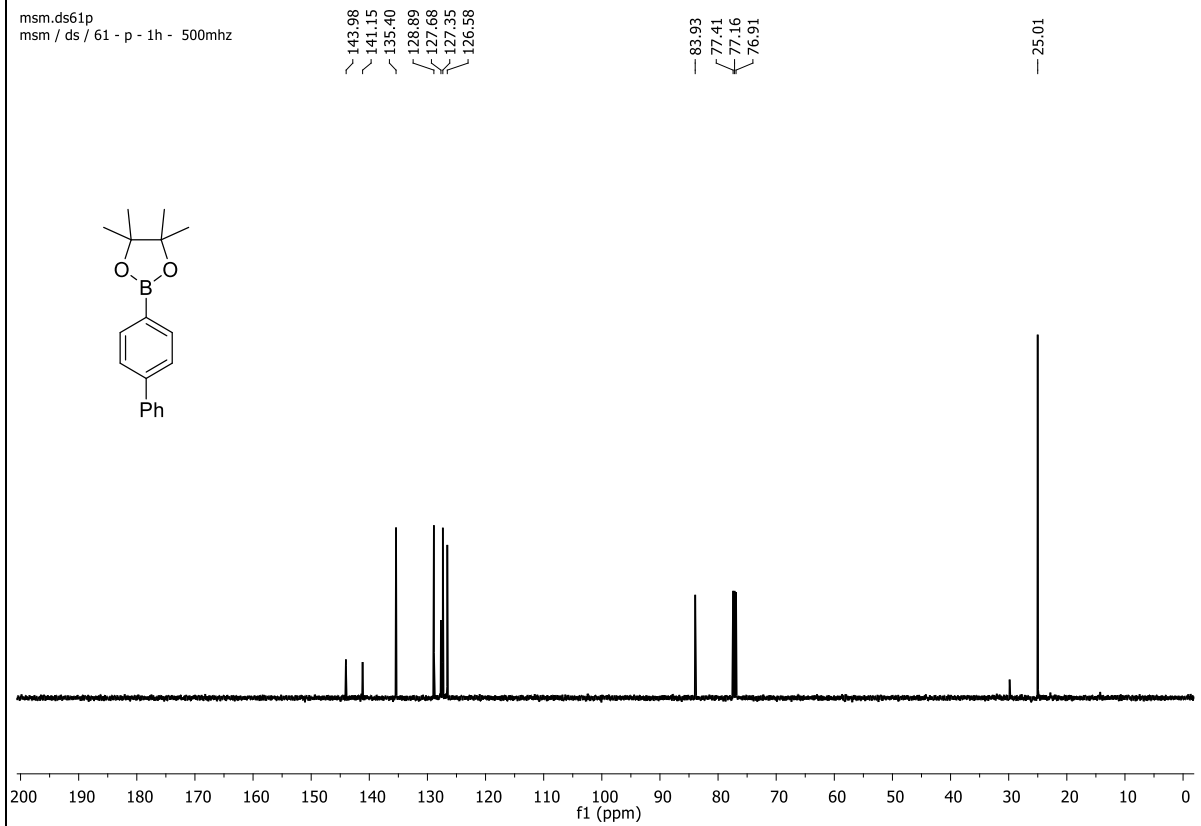

<sup>11</sup>B (160 MHz) NMR of **2d** in CDCl<sub>3</sub>

msm.ds61p  
msm / ds / 61 - p - 11B-500mhz

— 31.178

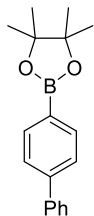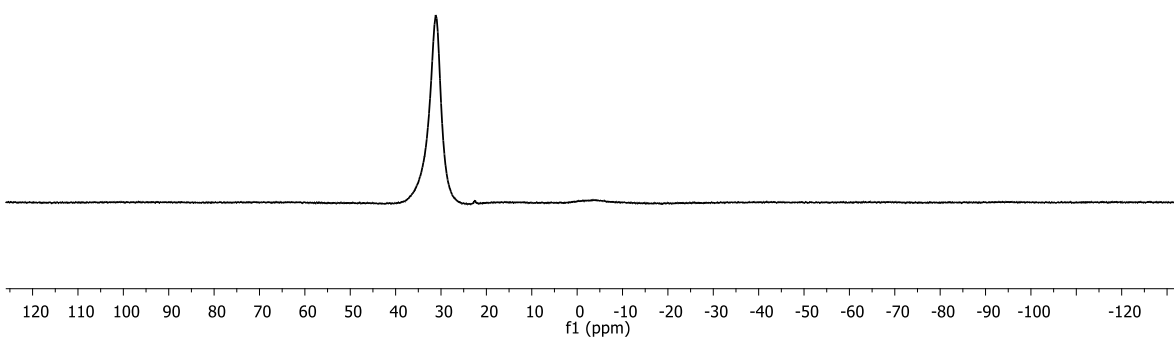

$^1\text{H}$  (500 MHz) and  $^{13}\text{C}$  (126 MHz) NMR of **2e** in  $\text{CDCl}_3$

msm.ds66  
msm / ds / 66 - 1h -500mhz

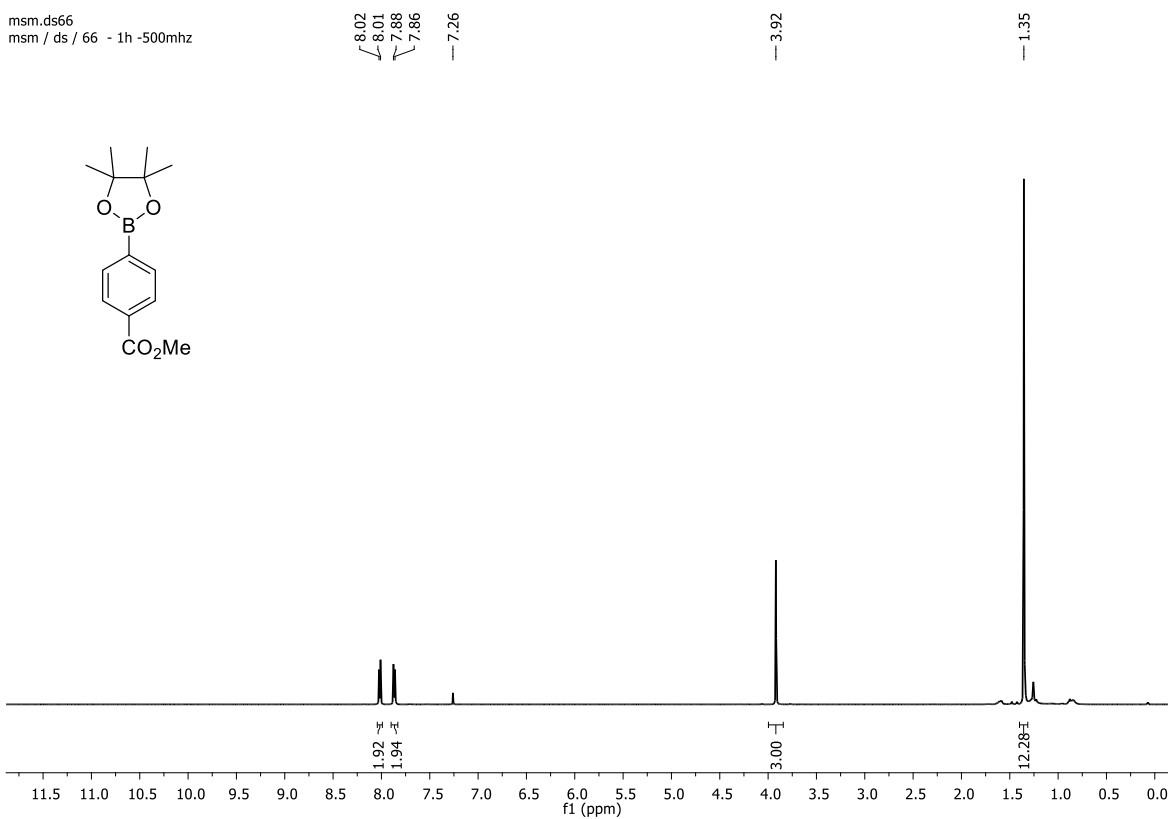

13C  
msm / ds / 66 - 13c -500mhz

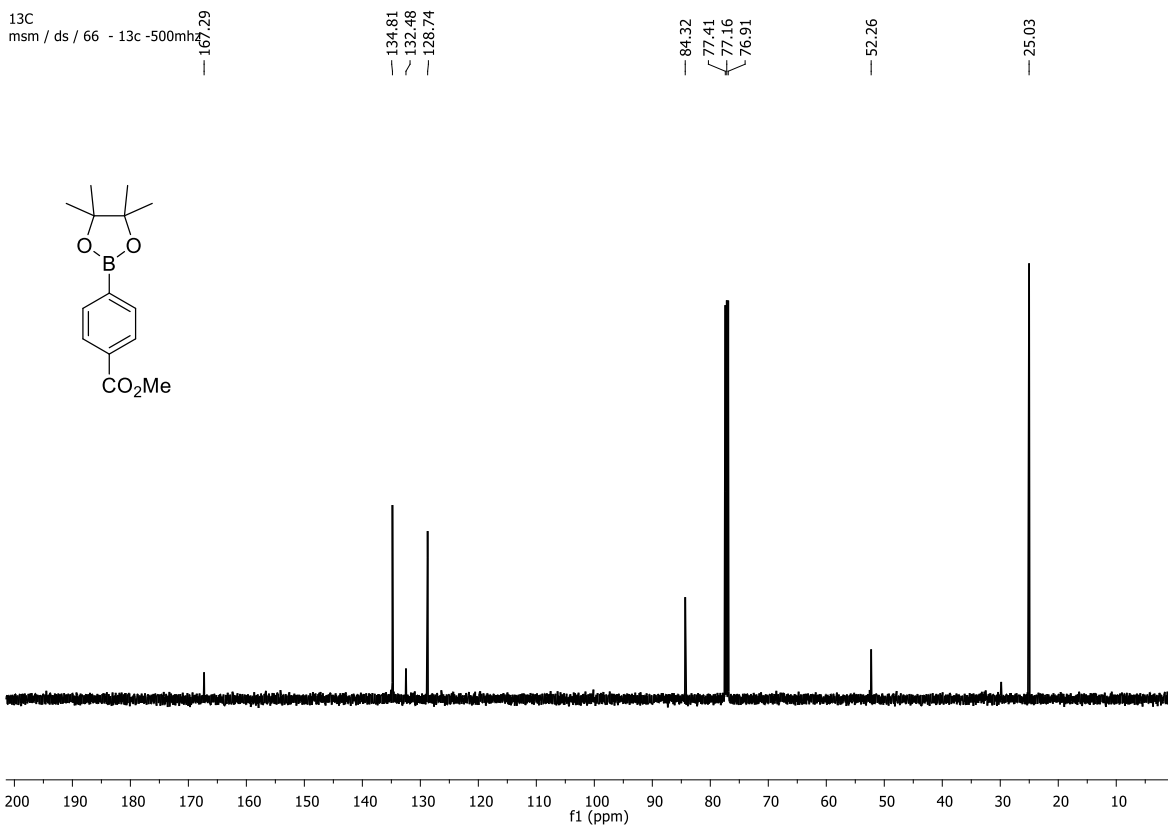



<sup>11</sup>B (160 MHz) NMR of **2e** in CDCl<sub>3</sub>

msm.ds66 11B  
msm / ds / 66b - 11B-500mhz

— 30.75

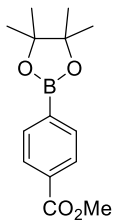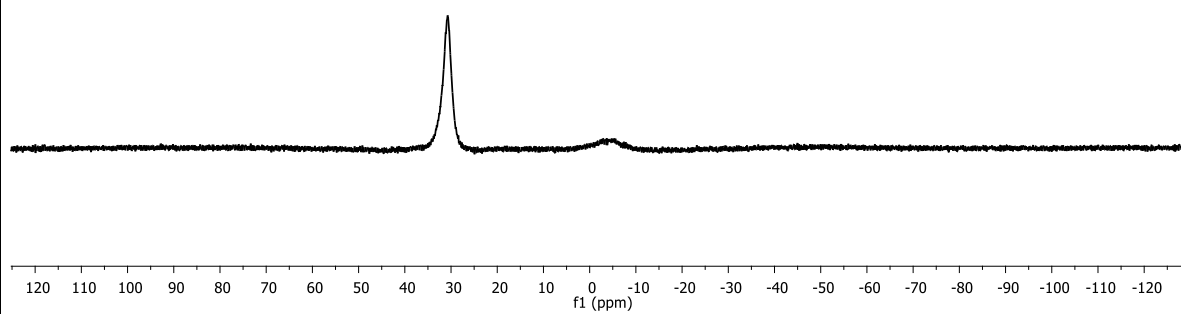

$^1\text{H}$  (500 MHz) and  $^{13}\text{C}$  (126 MHz) NMR of **2f** in  $\text{CDCl}_3$

msm.ds137c  
msm / ds / 137 (c) - 13c - 500mhz

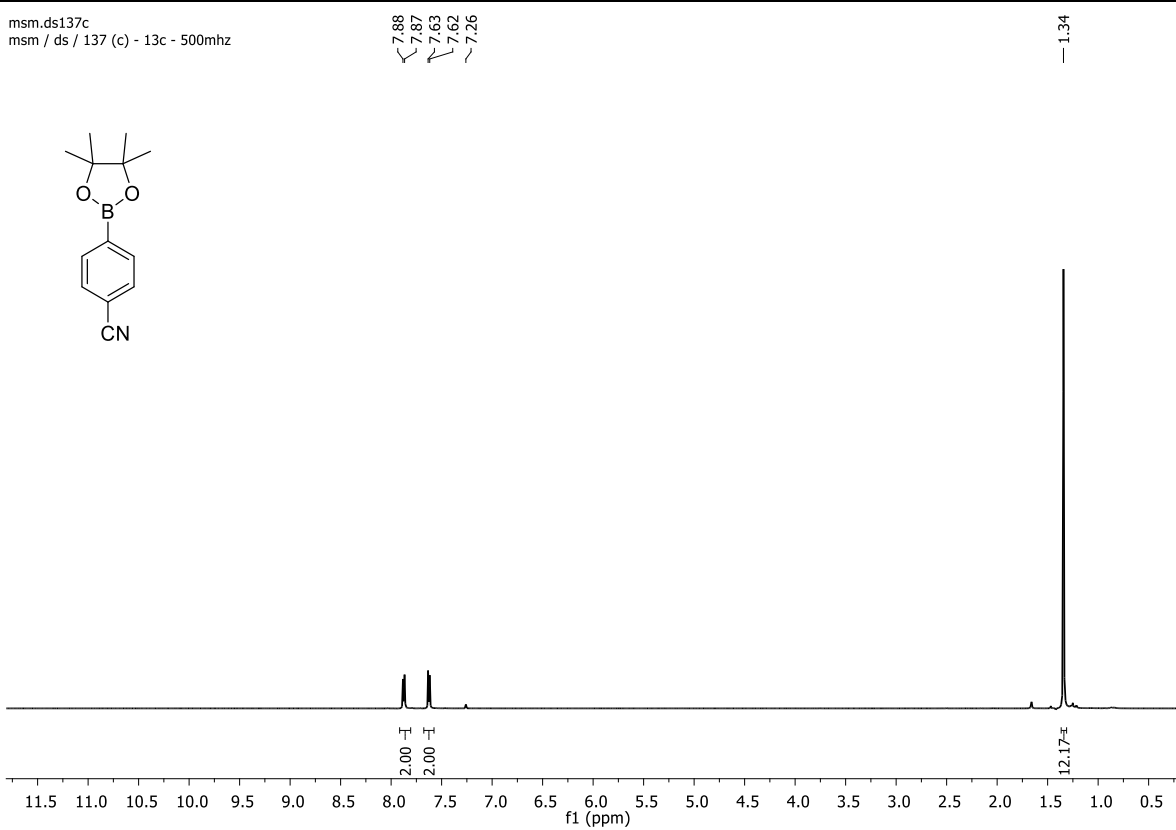

msm.ds137c  
msm / ds / 137 (c) - 13c - 500mhz

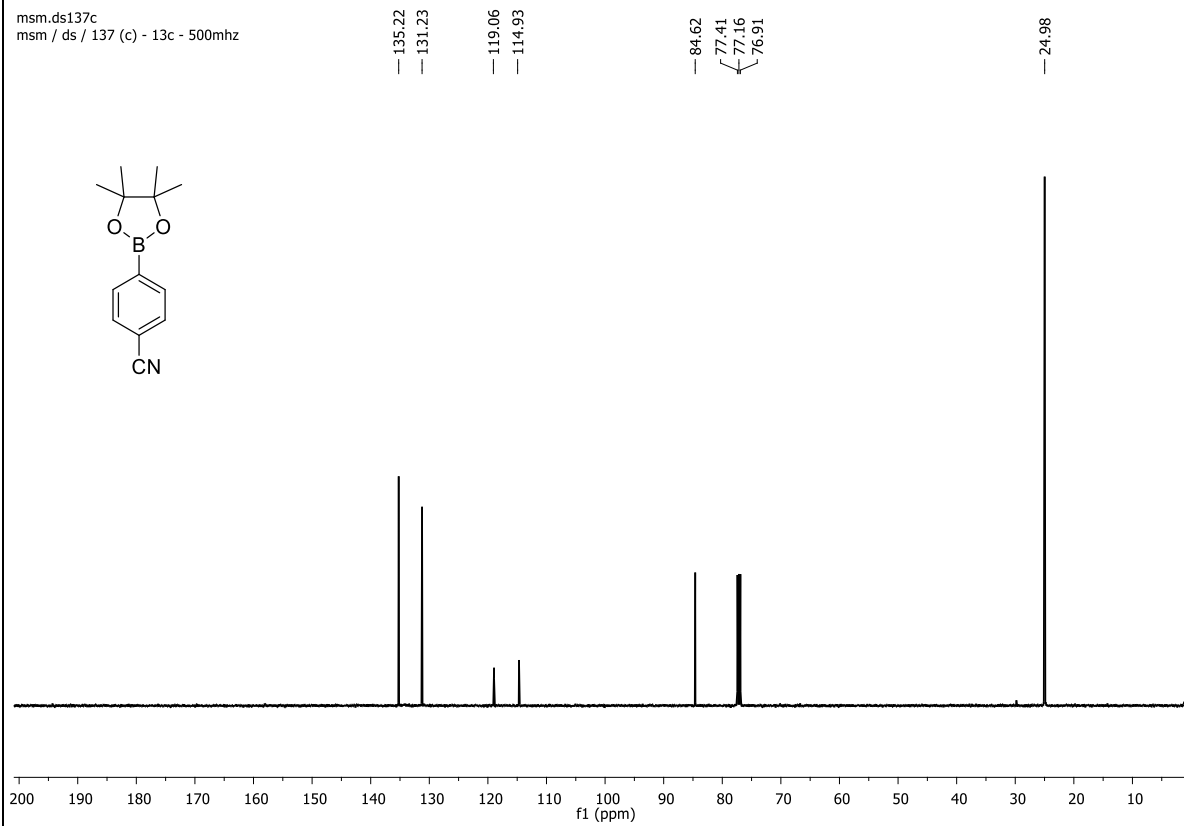

<sup>11</sup>B (160 MHz) NMR of **2f** in CDCl<sub>3</sub>

msm.ds138b  
msm / ds / 138 b - 11B -500mhz

— 30.58

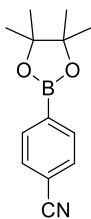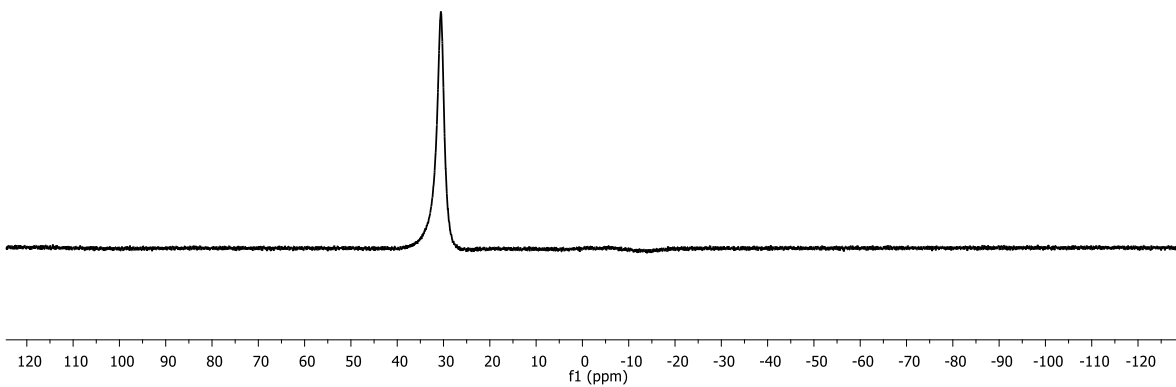

<sup>1</sup>H (400 MHz) and <sup>13</sup>C (126 MHz) NMR of **2g** in CDCl<sub>3</sub>

msm.ds55r  
msm.ds55r 1H 400 MHz

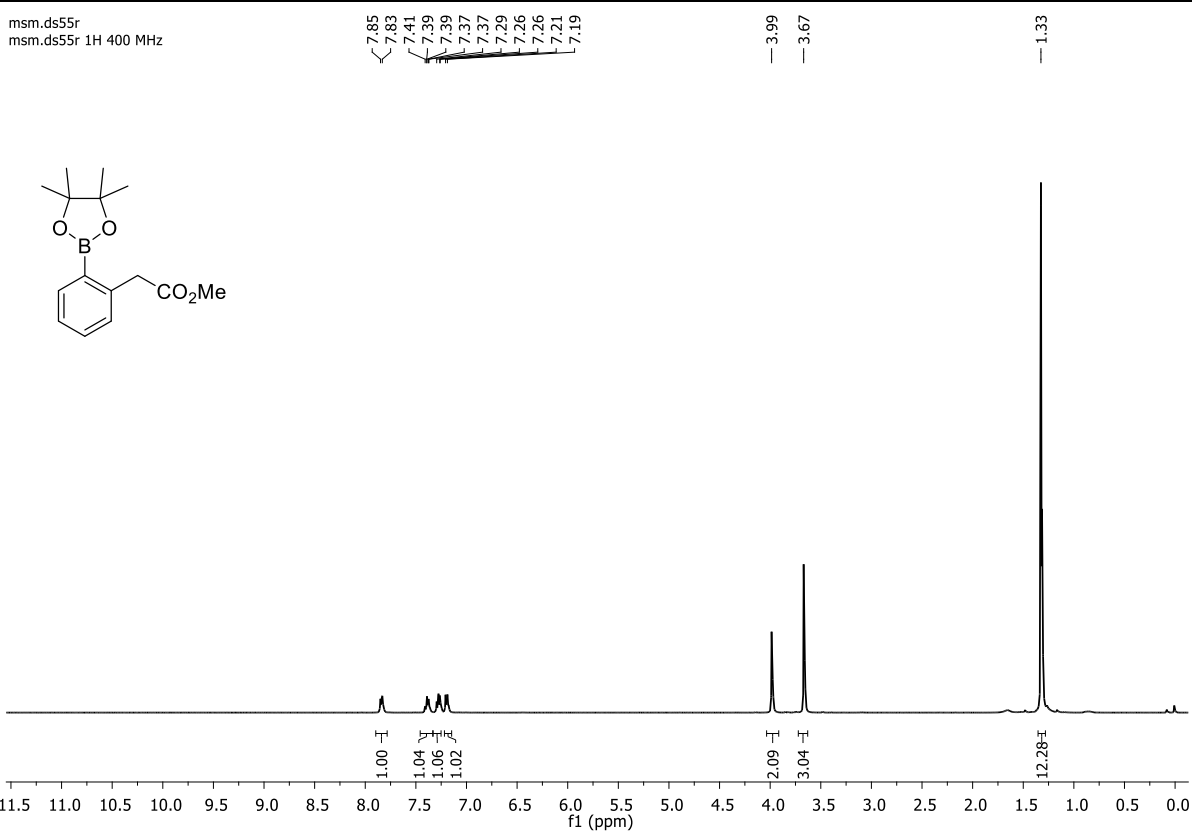

msm.ds55c  
msm / ds / 55 (c) - 13c - 126mhz

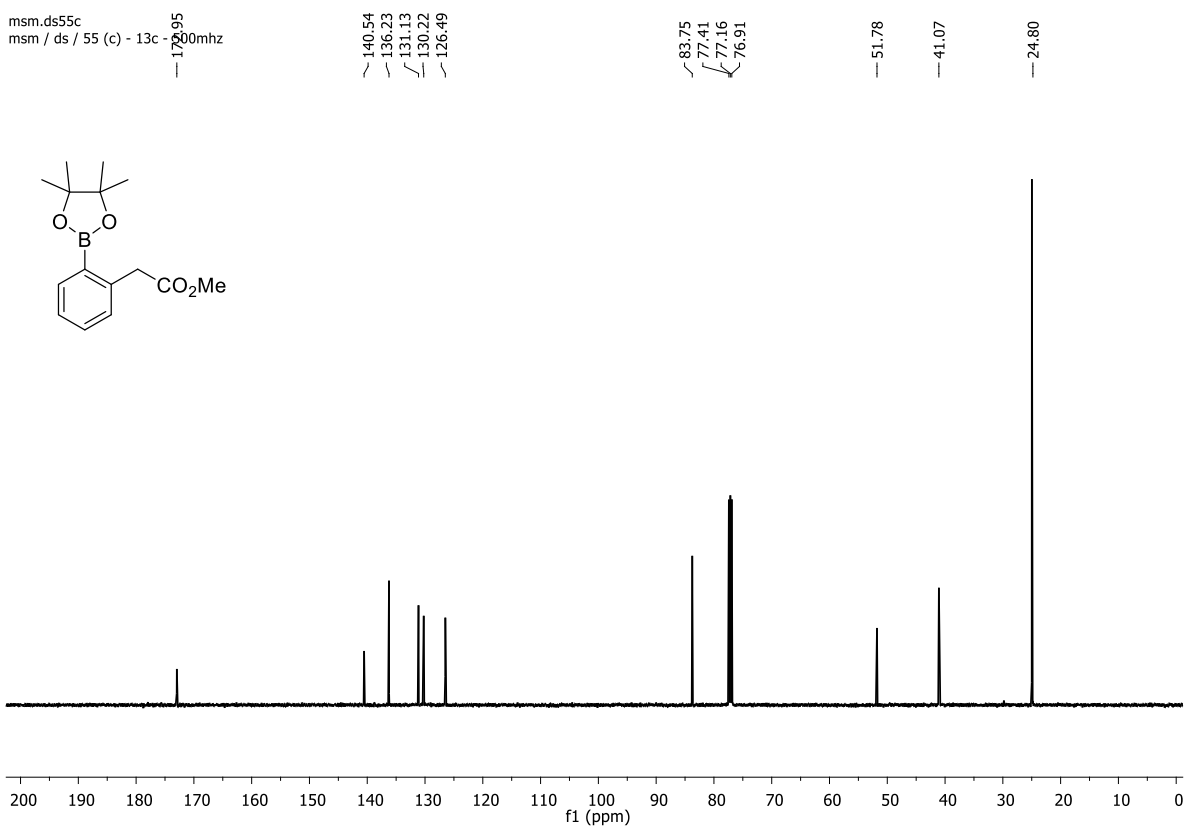

<sup>11</sup>B (160 MHz) NMR of **2g** in CDCl<sub>3</sub>

msm.ds55b  
msm.ds55b - 11B -500mhz

— 31.106

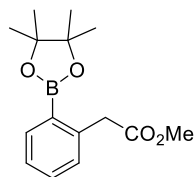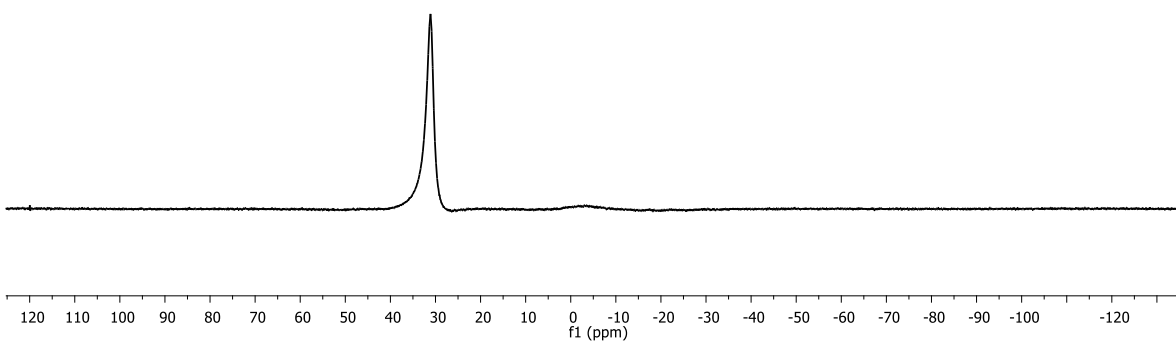

$^1\text{H}$  (400 MHz) and  $^{13}\text{C}$  (101 MHz) NMR of **2h** in  $\text{CDCl}_3$

msm.ds183  
msm.ds183 1H NMR - 400 MHz

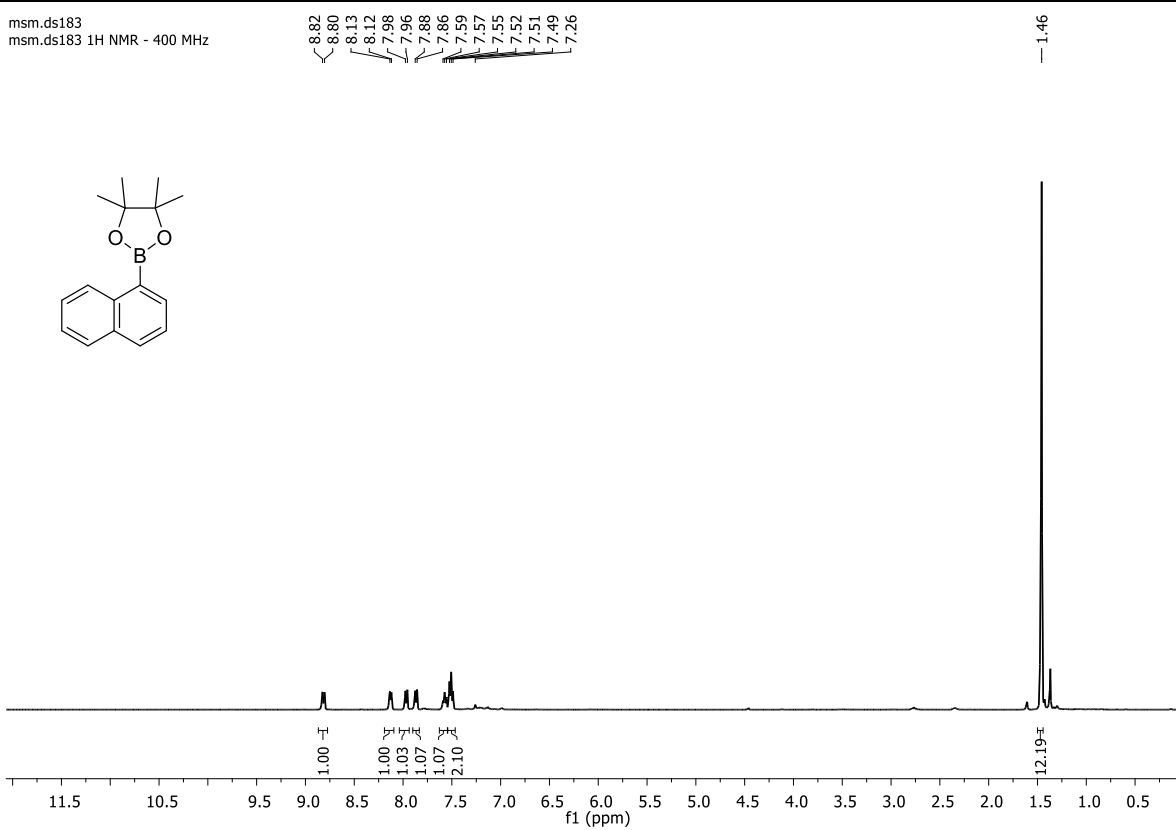

$^{13}\text{C}$   
msm.ds183  $^{13}\text{C}$  NMR - 400 MHz

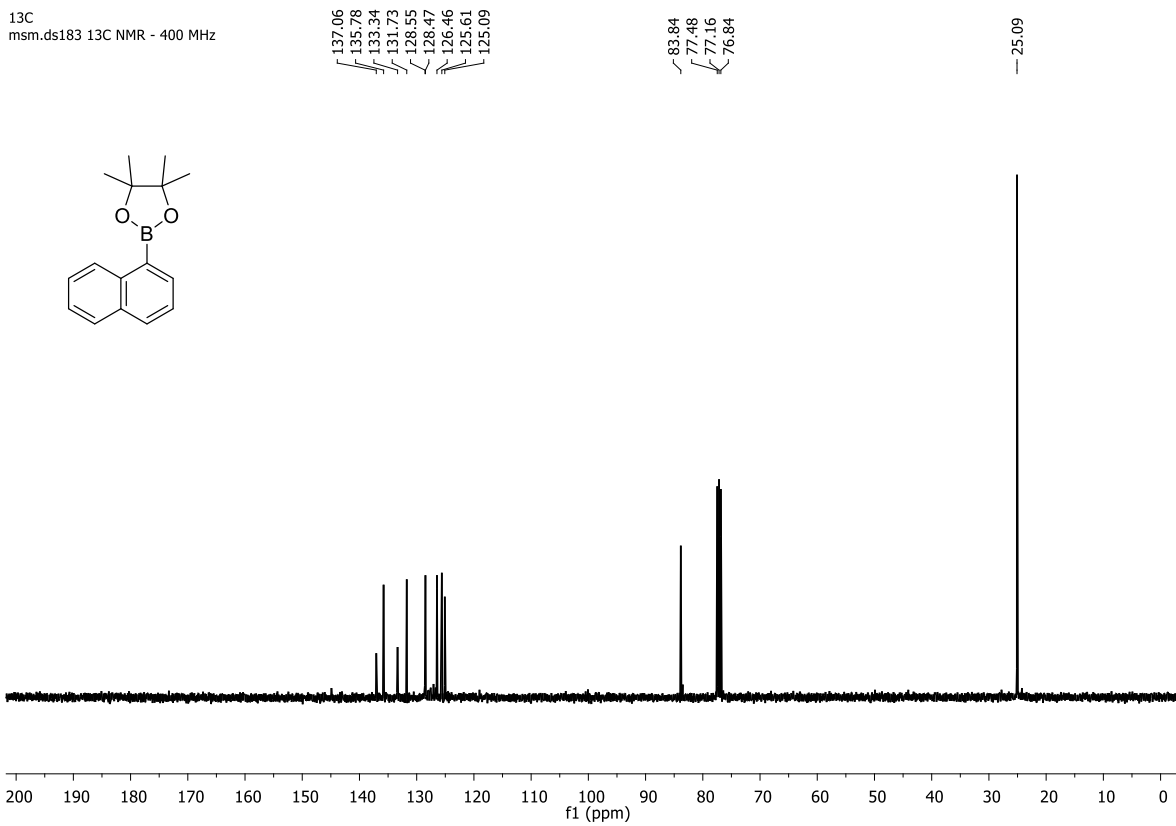

<sup>11</sup>B (160 MHz) NMR of **2h** in CDCl<sub>3</sub>

11B  
msm / ds / 183 (b) - 11B - 500mhz

→ 31.79

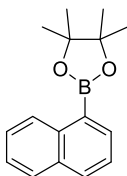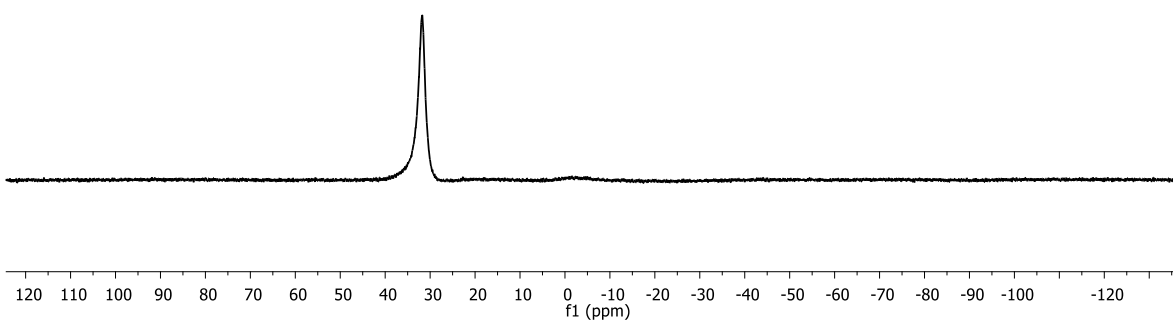

$^1\text{H}$  (500 MHz) and  $^{13}\text{C}$  (126 MHz) NMR of **2i** in  $\text{CDCl}_3$

msm.ds104f  
msm / ds / 104 f - 13c - 500mhz

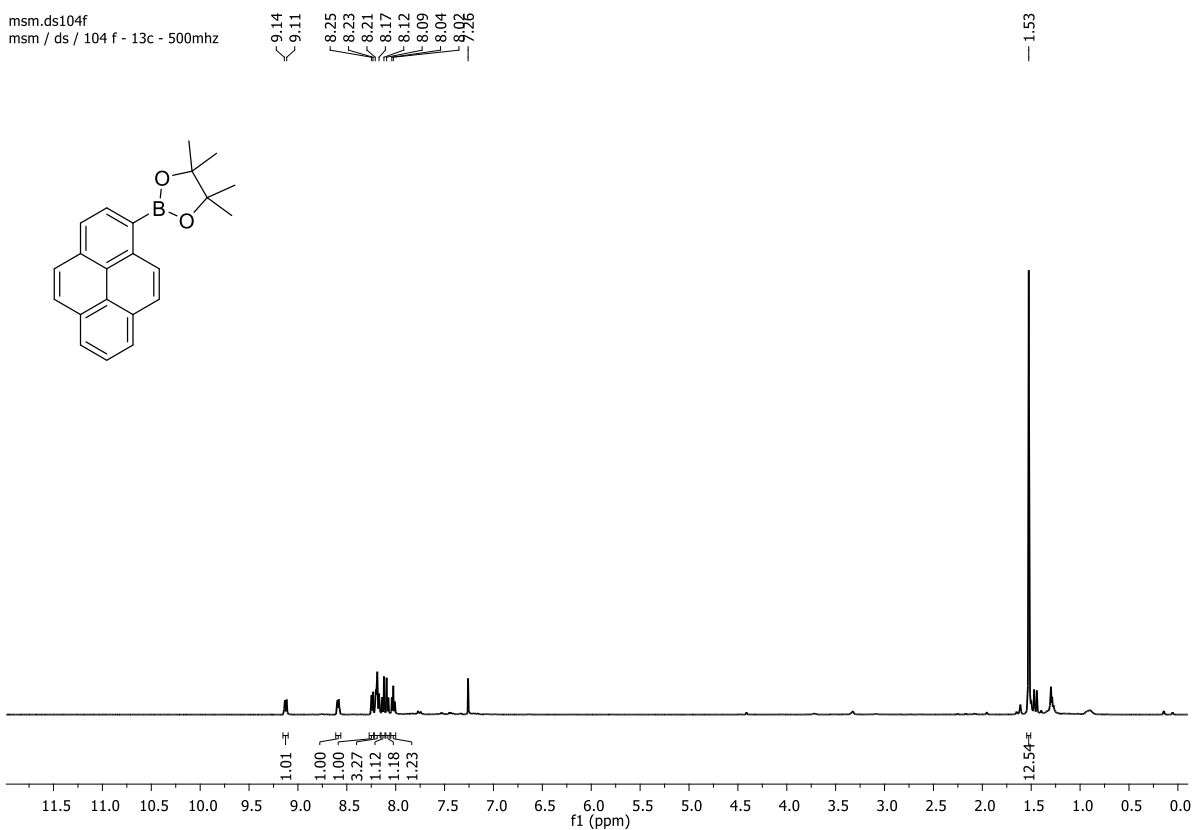

msm.ds104f  
msm / ds / 104 f - 13c - 500mhz

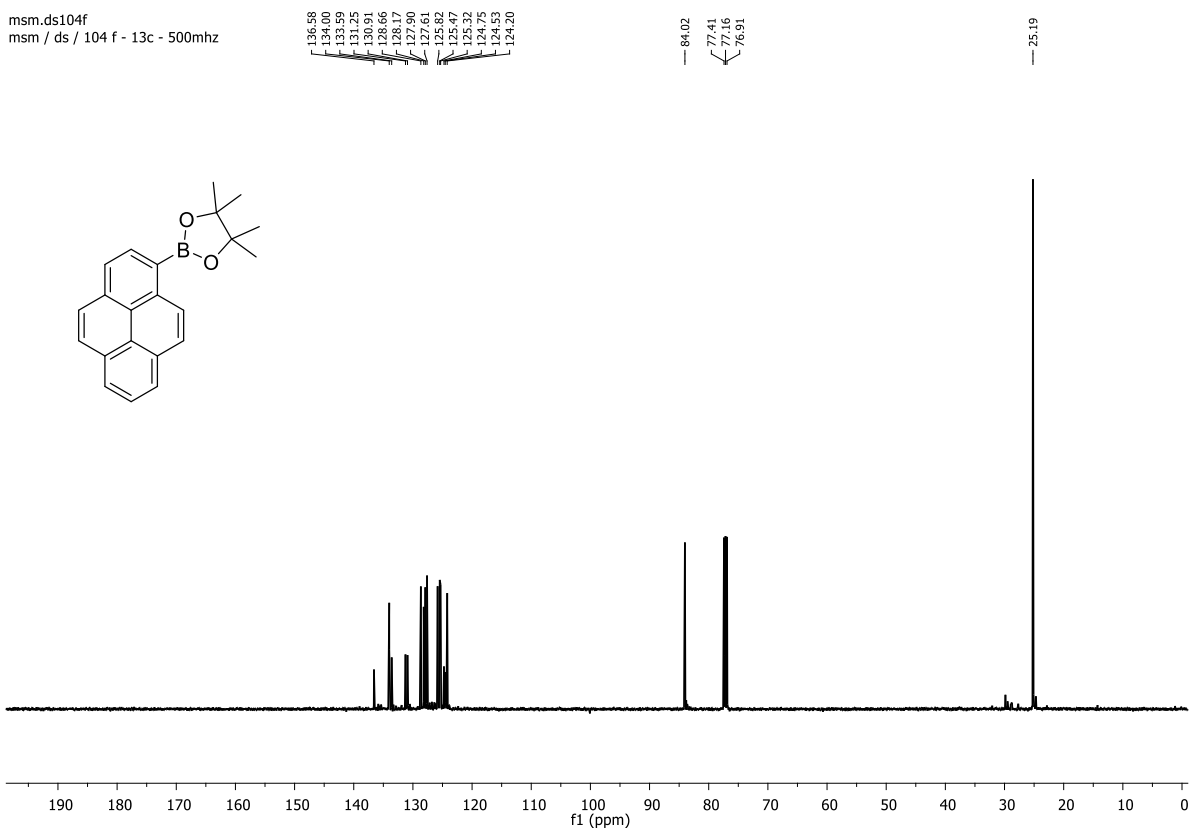



<sup>11</sup>B (160 MHz) NMR of **2i** in CDCl<sub>3</sub>

mzm.ds104b  
mzm / ds / 104 (b) - 11B -500mhz

— 31.92

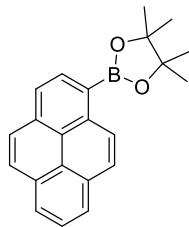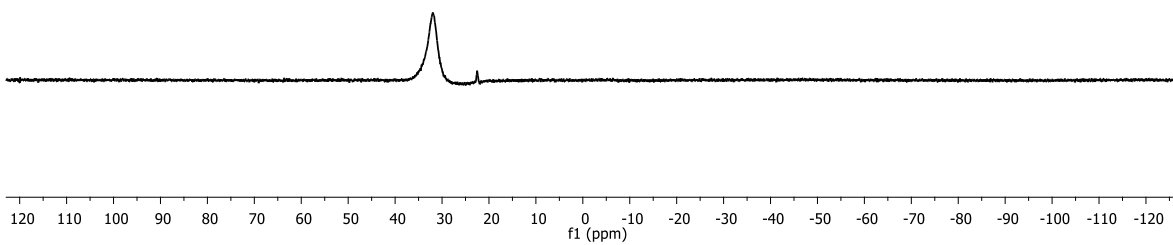

<sup>1</sup>H (400 MHz) and <sup>13</sup>C (101 MHz) NMR of **2j** in CDCl<sub>3</sub>

msm.ds1461s  
msm.ds1461s 1H NMR- 400 MHz

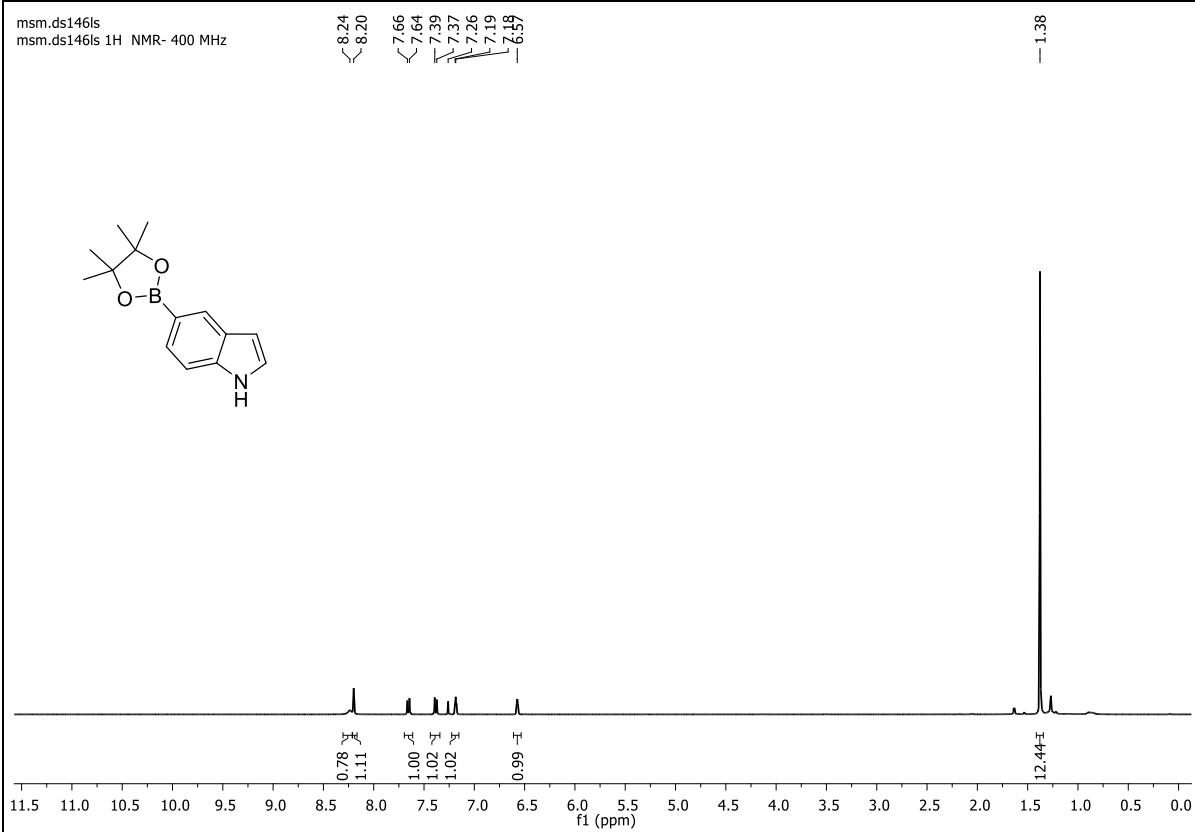

<sup>13</sup>C  
msm.ds1461s <sup>13</sup>C NMR- 400 MHz

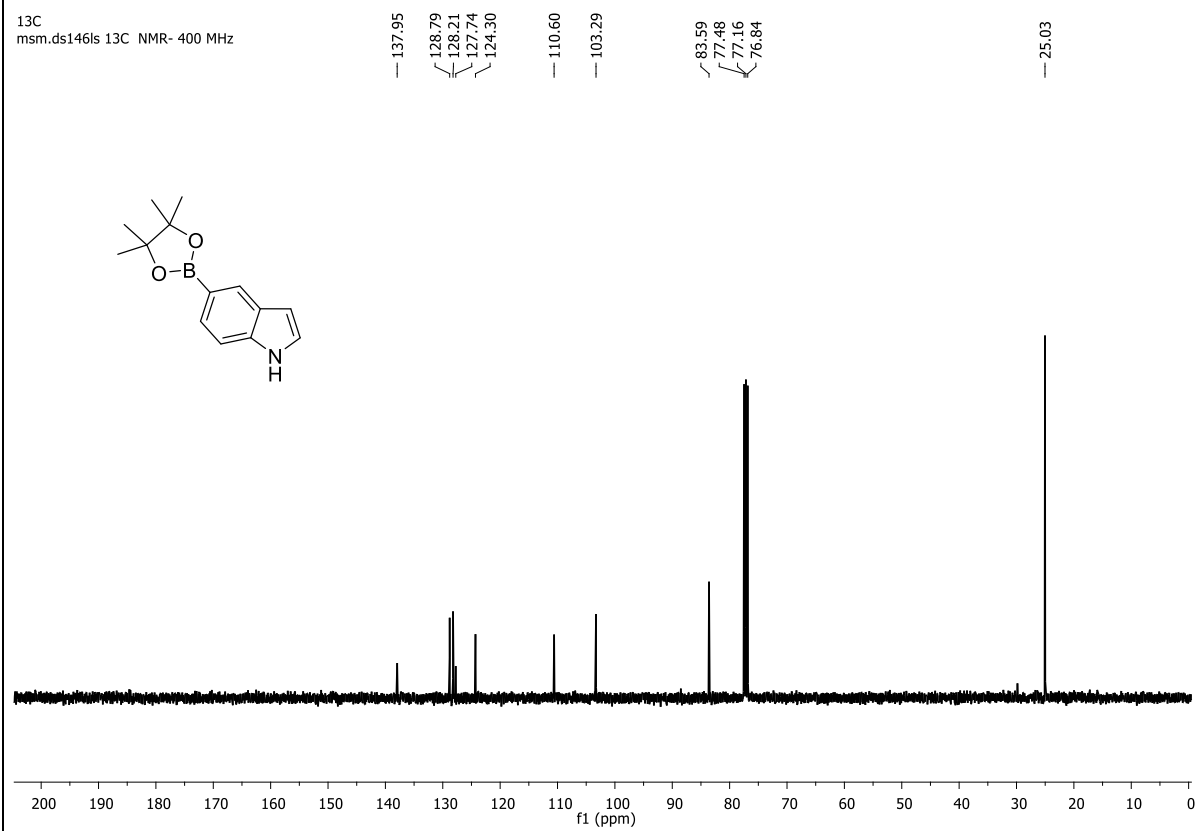

<sup>11</sup>B (160 MHz) NMR of **2j** in CDCl<sub>3</sub>

11B  
msm / ds / 146 (b) - 11B -500mhz

— 31.57

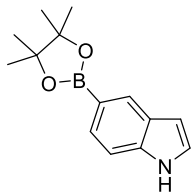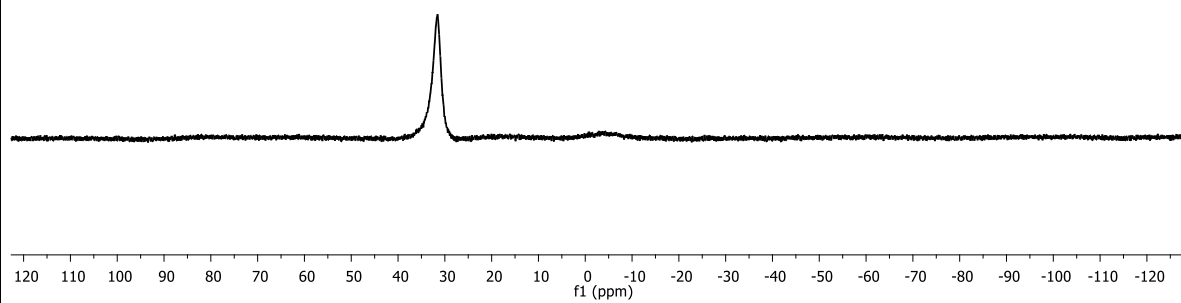

<sup>1</sup>H (400 MHz) and <sup>13</sup>C (126 MHz) NMR of **2k** in CDCl<sub>3</sub>

msm.ds189u  
msm.ds189u-1h-400mhz

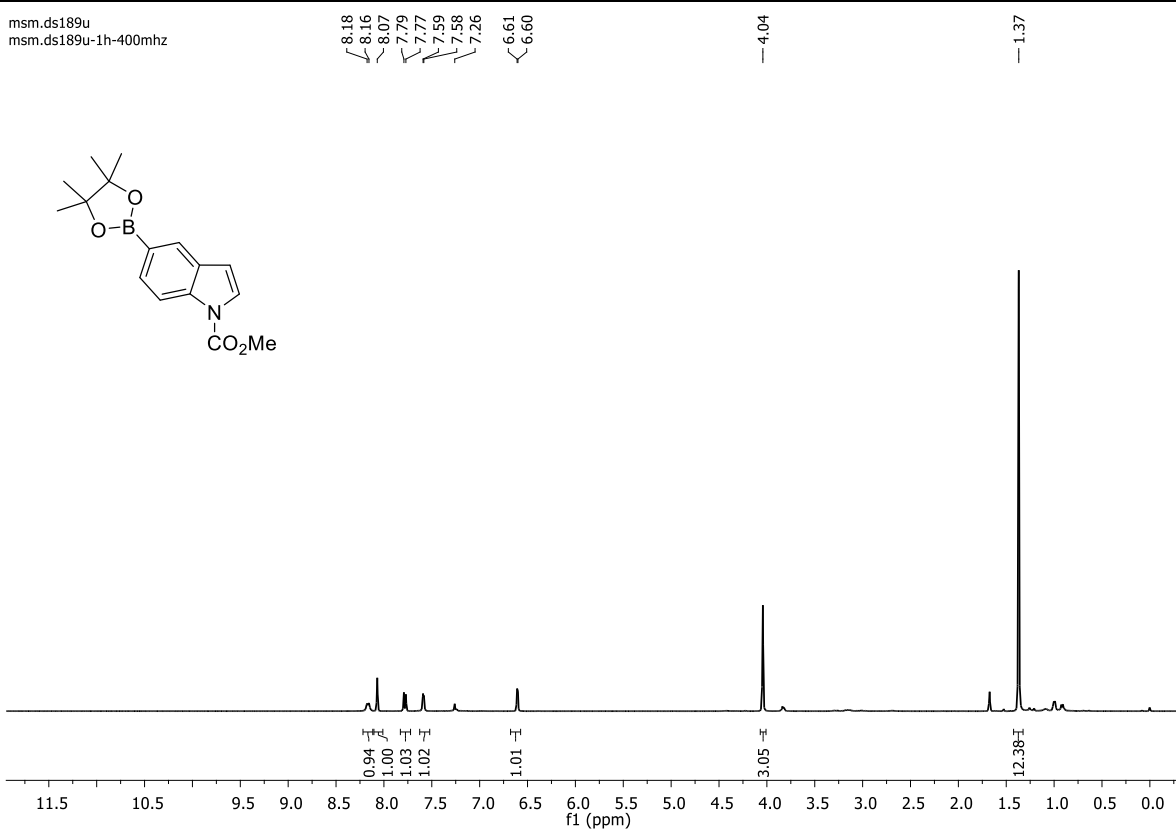

msm.ds189r  
msm / ds / 189 (r) - 13c - 500mhz

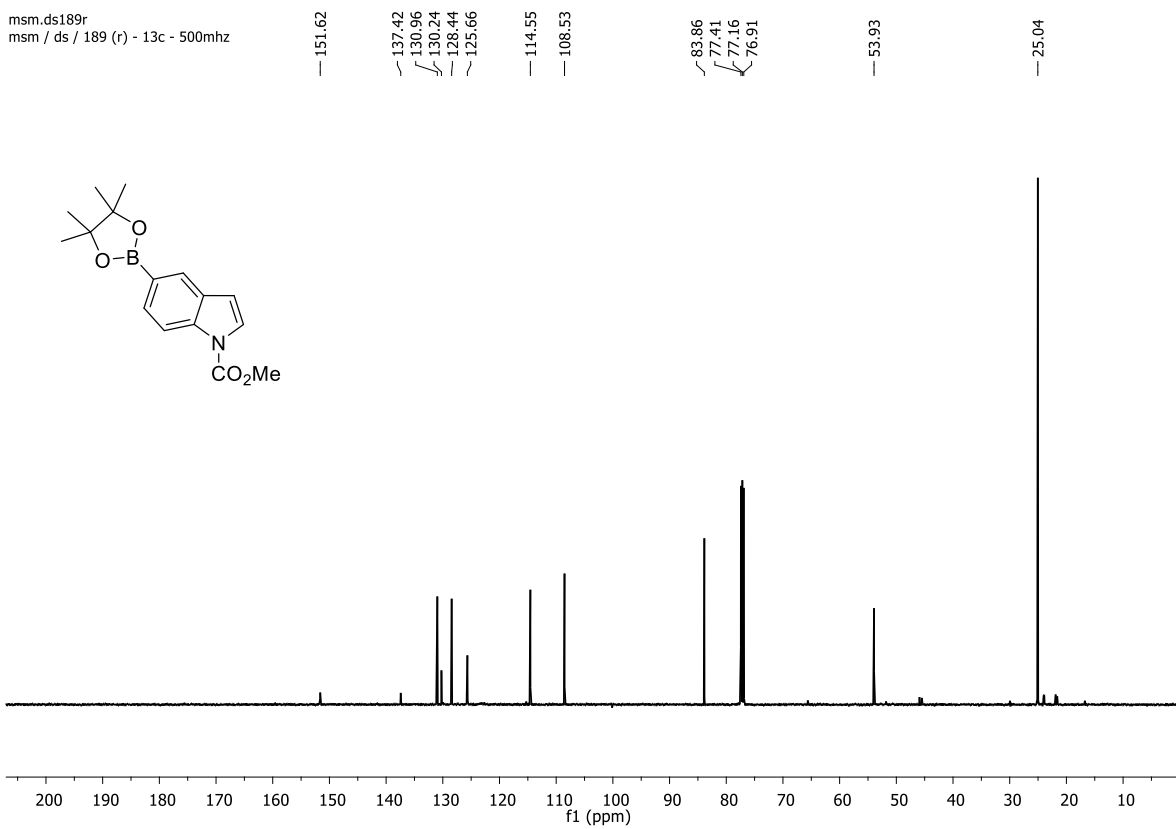

<sup>11</sup>B (160 MHz) NMR of **2k** in CDCl<sub>3</sub>

11B  
msm / ds / 189 (p) - 11B -500mhz

-31.41

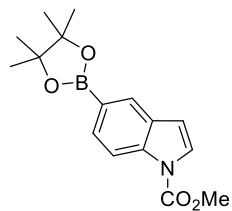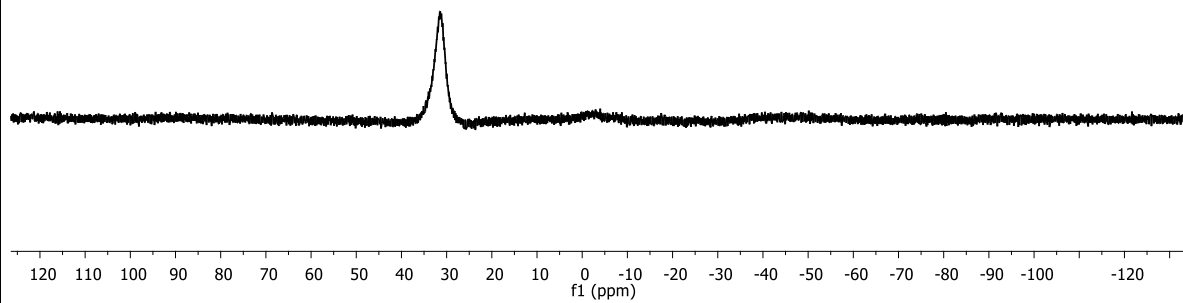

<sup>1</sup>H (400 MHz) and <sup>13</sup>C (101 MHz) NMR of **21** in CDCl<sub>3</sub>

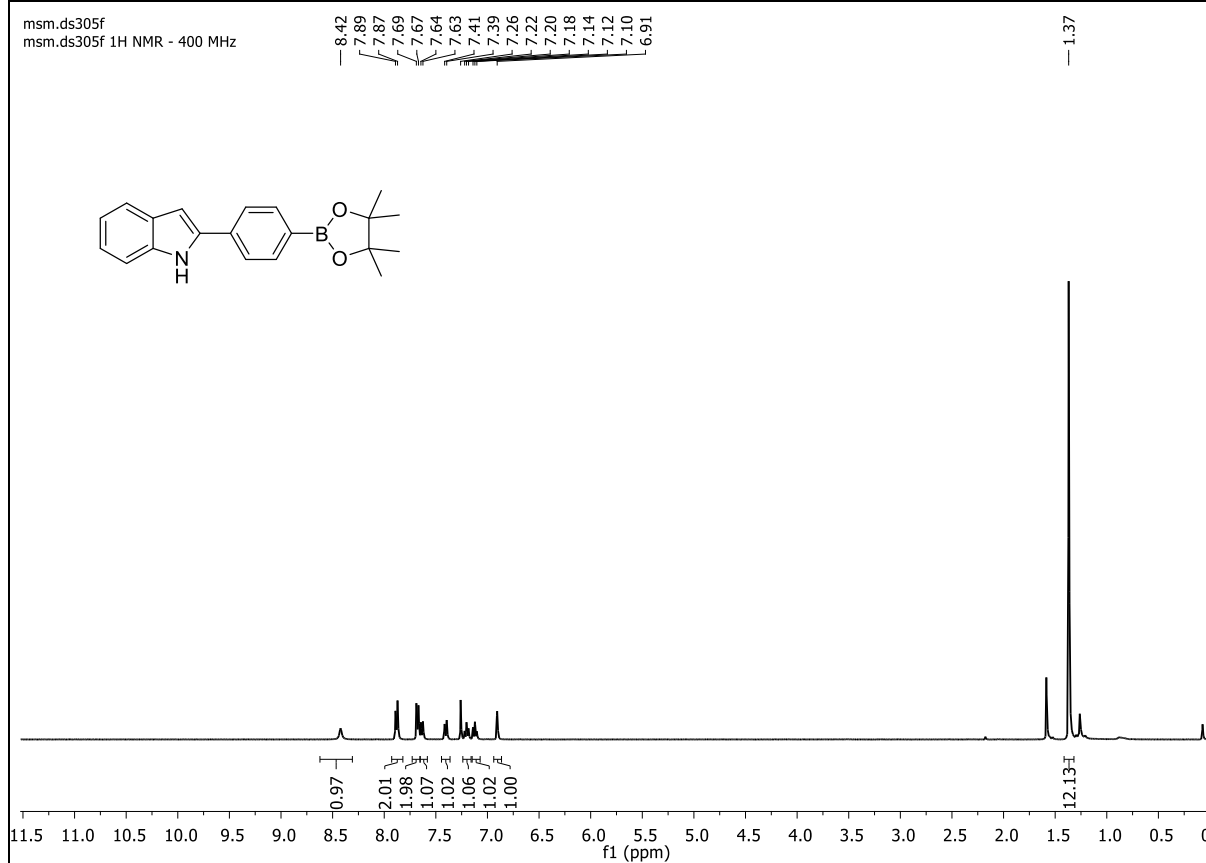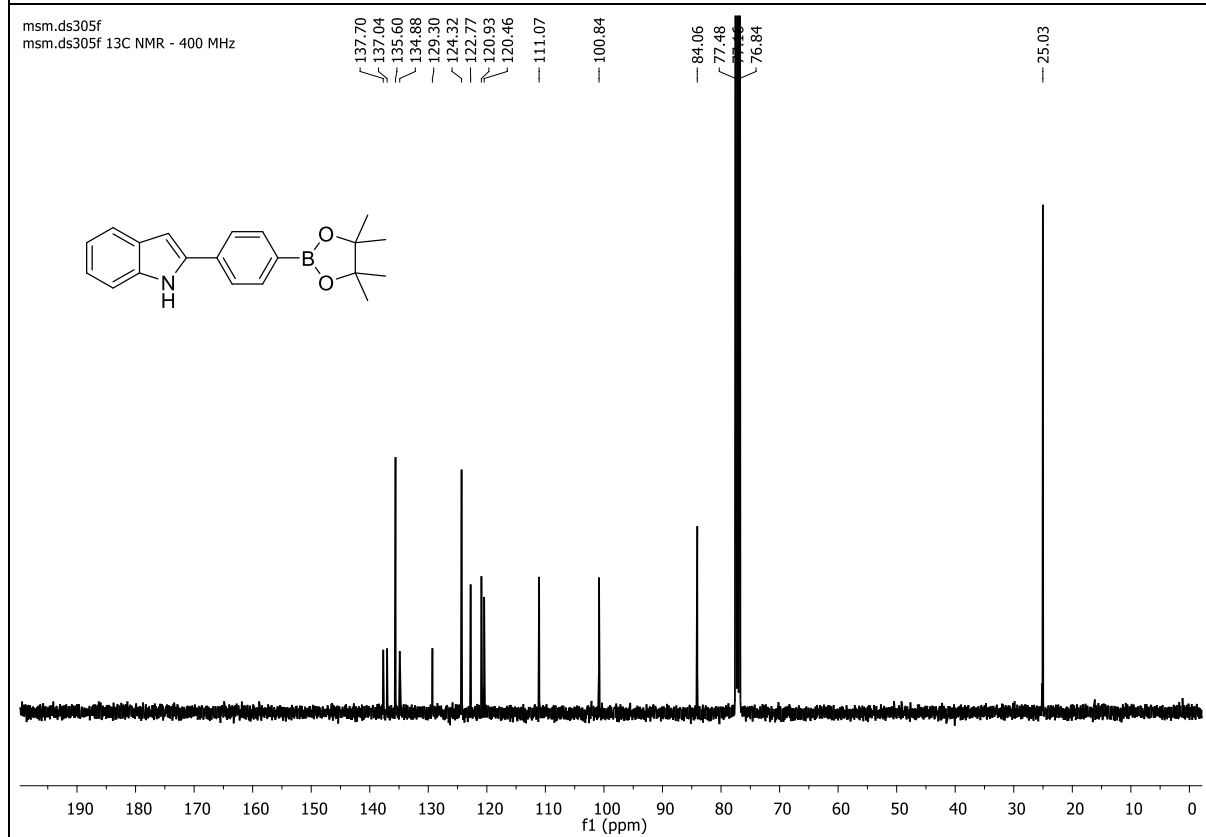

<sup>11</sup>B (160 MHz) NMR of **2l** in CDCl<sub>3</sub>

msm.ds305b1  
msm / ds / 305 (b1) - 11B-500mhz

30.60

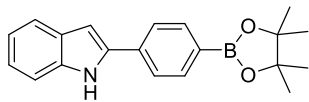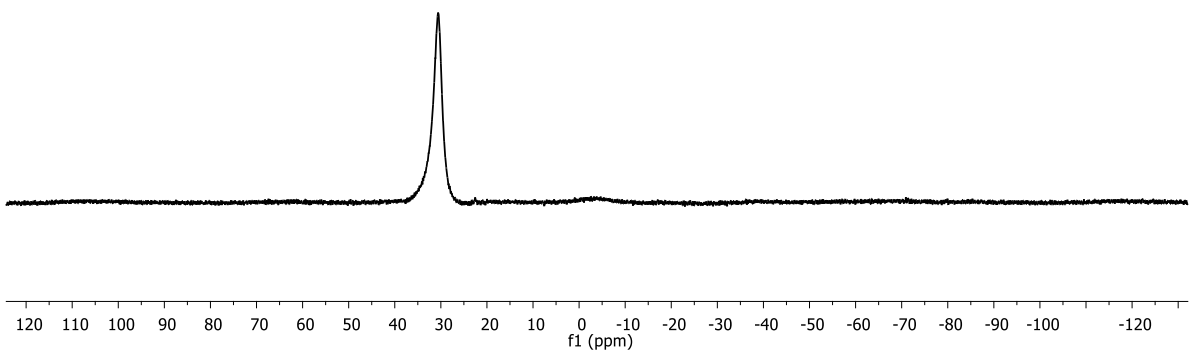

<sup>1</sup>H (400 MHz) and <sup>13</sup>C (126 MHz) NMR of **2m** in CDCl<sub>3</sub>

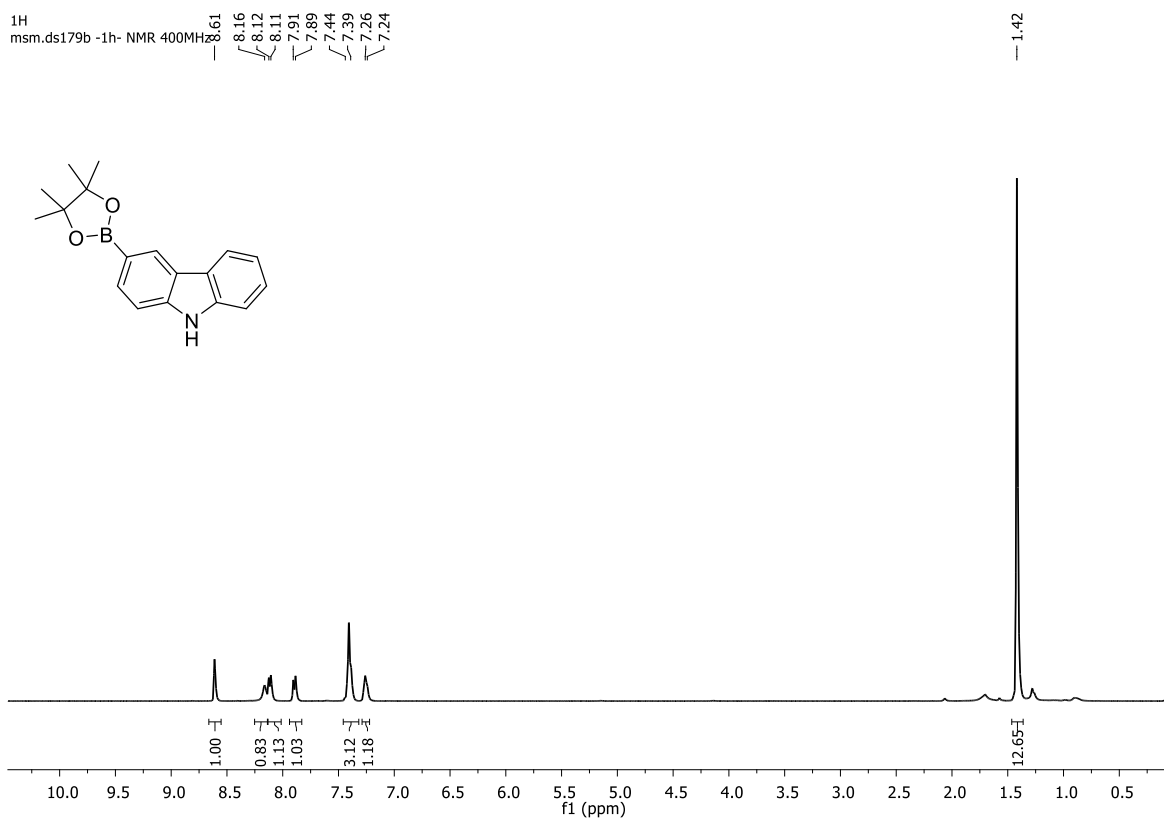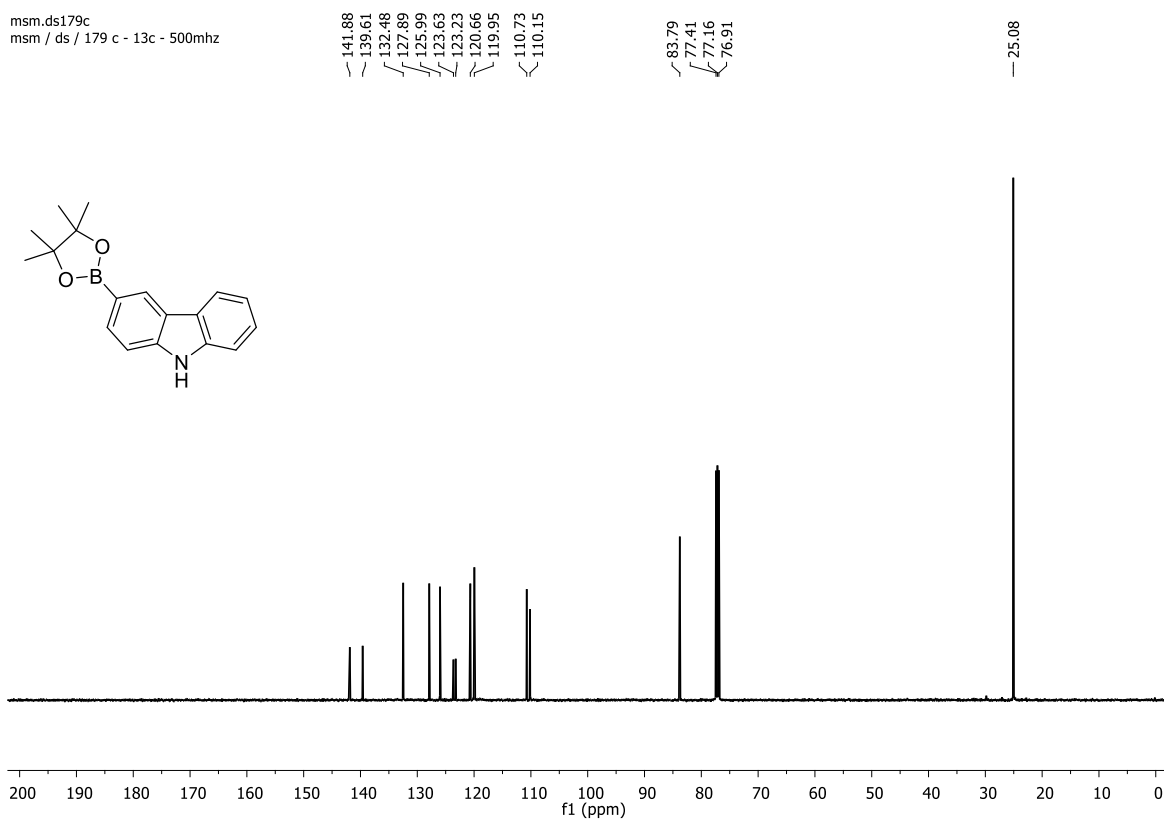



<sup>11</sup>B (160 MHz) NMR of **2m** in CDCl<sub>3</sub>

mzm.ds179  
mzm / ds / 179 - 11B -500mhz

-31.61

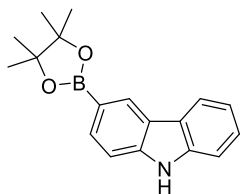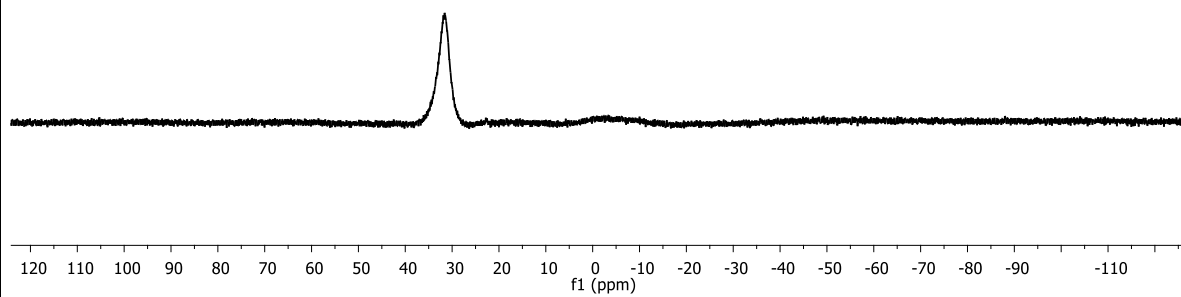

<sup>1</sup>H (400 MHz) and <sup>13</sup>C (101 MHz) NMR of **2n** in CDCl<sub>3</sub>

msm.ds181-13C  
msm.ds18213C -1h -NMR 400 MHz

8.65  
8.25  
7.67  
7.85  
7.40  
7.38  
7.26

1.39

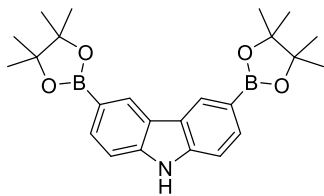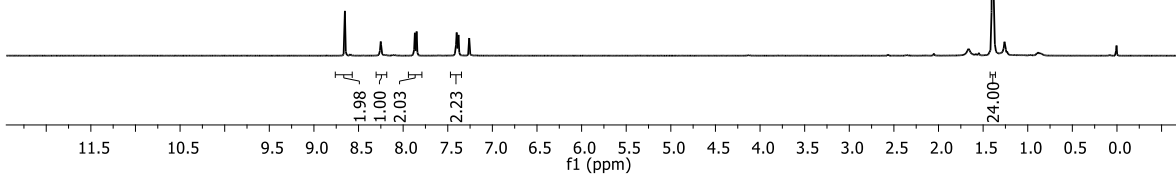

msm.ds181-13C  
msm.ds181 13C -NMR 400 MHz

141.84  
132.46  
126.29  
123.39

110.23

83.83  
77.59  
77.28  
76.96

25.19

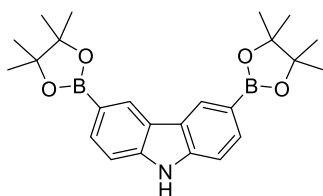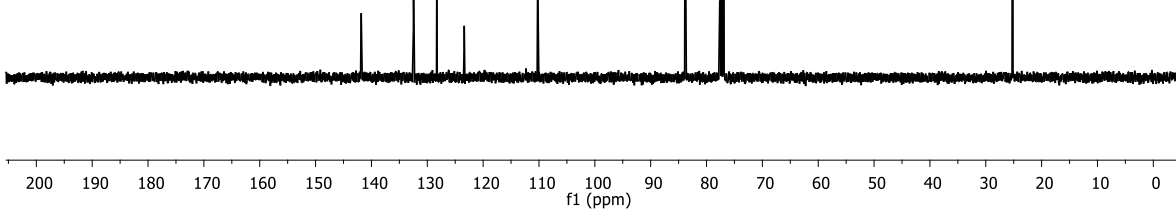

<sup>11</sup>B (160 MHz) NMR of **2n** in CDCl<sub>3</sub>

msm.ds181b  
msm / ds / 181 (b) - 11B - 500mhz

— 31.49

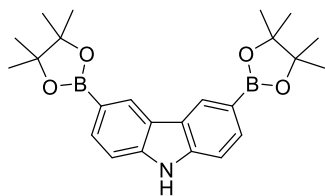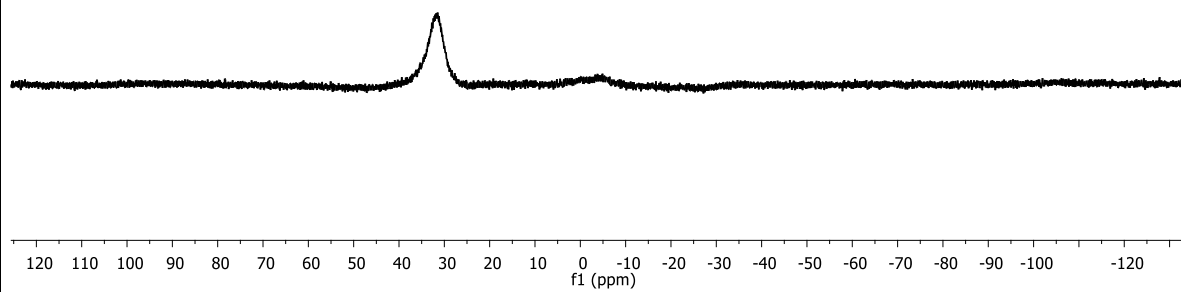

$^1\text{H}$  (400 MHz) and  $^{13}\text{C}$  (101 MHz) NMR of **2o** in  $\text{CDCl}_3$

mzm.ds239  
mzm.ds239 -1h -400mhz

8.28  
7.91  
7.89  
7.39  
7.37  
7.35  
7.26

1.34

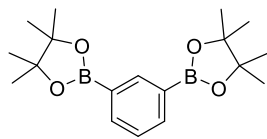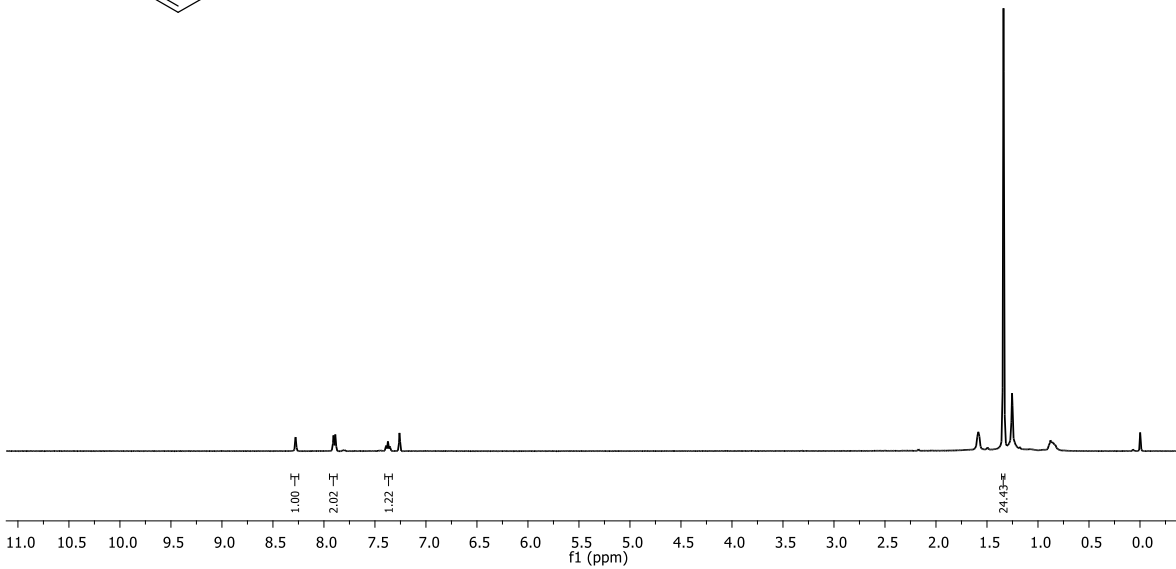

mzm.ds239C1  
mzm.ds239C1 13C NMR 400 MHz

141.35  
137.76  
127.20

83.88  
77.48  
77.16  
76.84

25.01

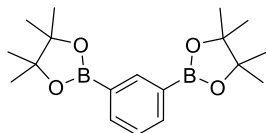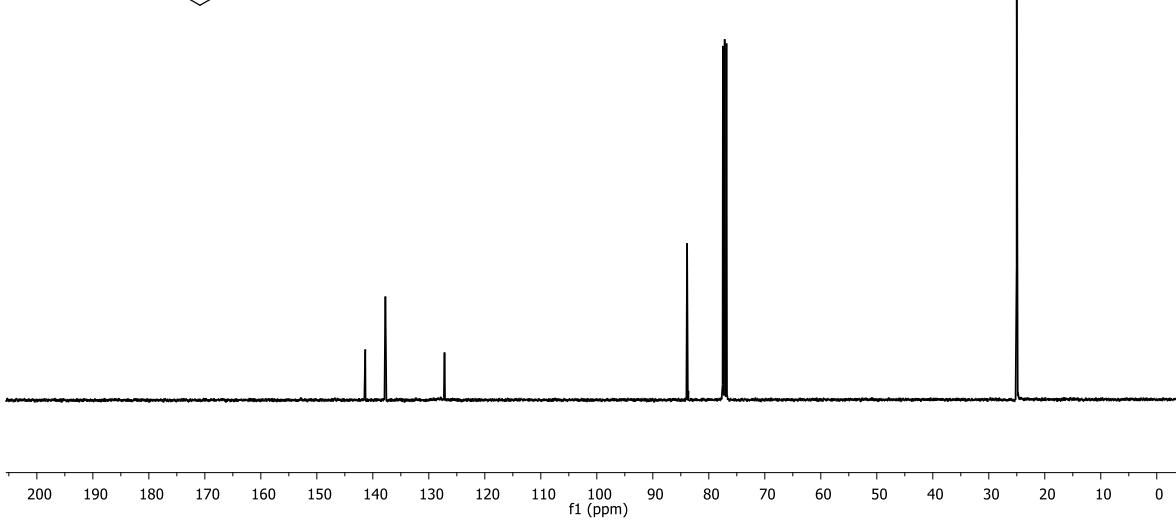

<sup>11</sup>B (160 MHz) NMR of **2o** in CDCl<sub>3</sub>

msm.ds239r2  
msm.ds239r2 - 11B -500mhz

— 31.21

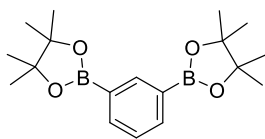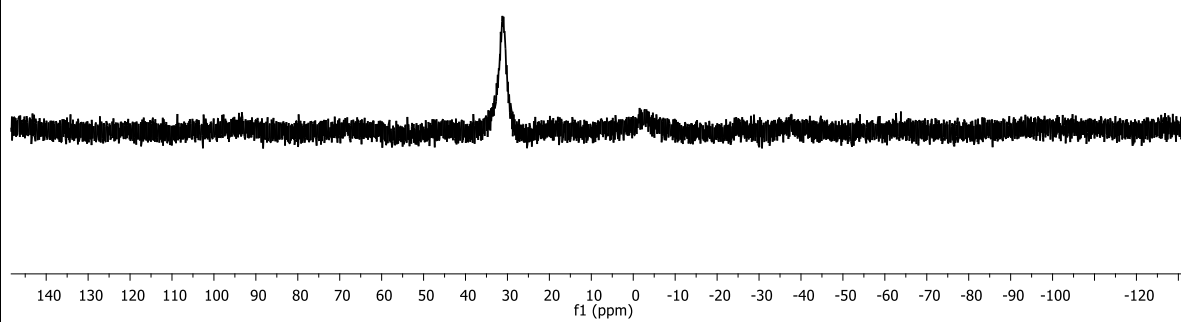

$^1\text{H}$  (400 MHz) and  $^{13}\text{C}$  (101 MHz) NMR of **2p** in  $\text{CDCl}_3$

$^1\text{H}$   
msm.ds151 NMR - 400 MHz

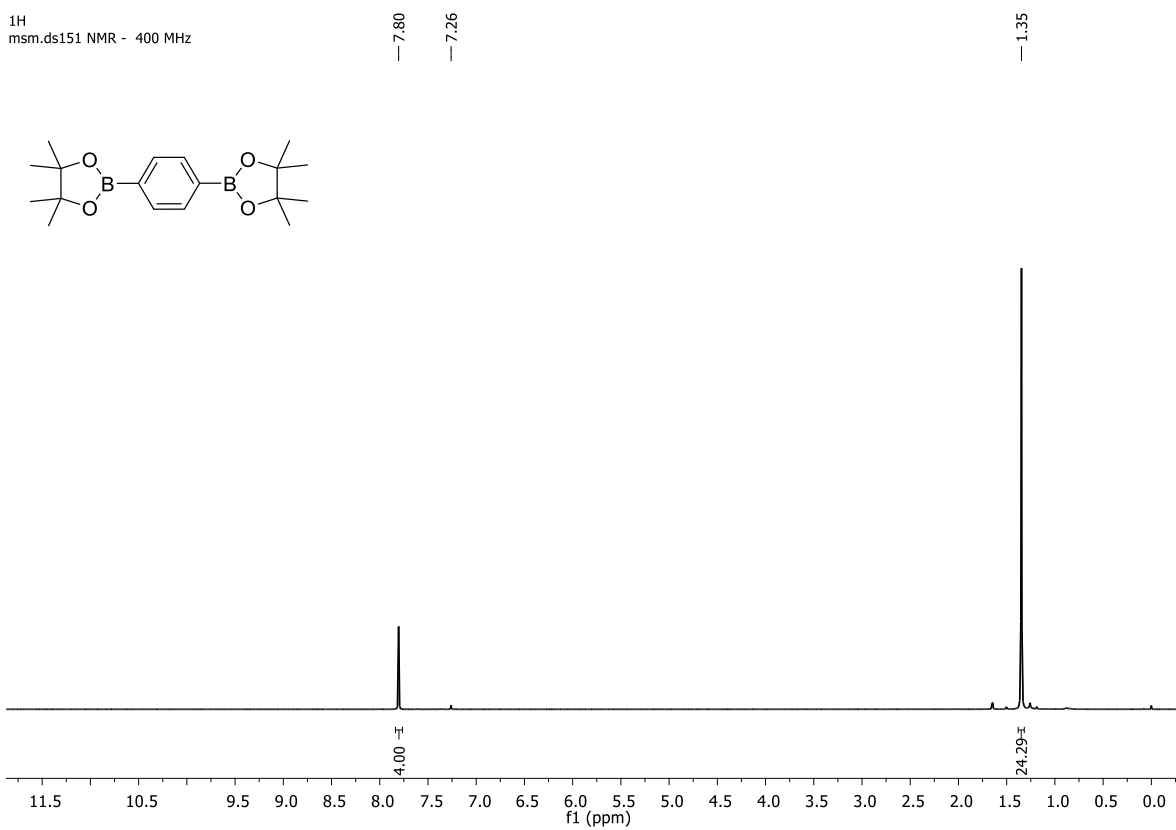

msm.ds151  
msm.ds151  $^{13}\text{C}$  NMR - 400 MHz

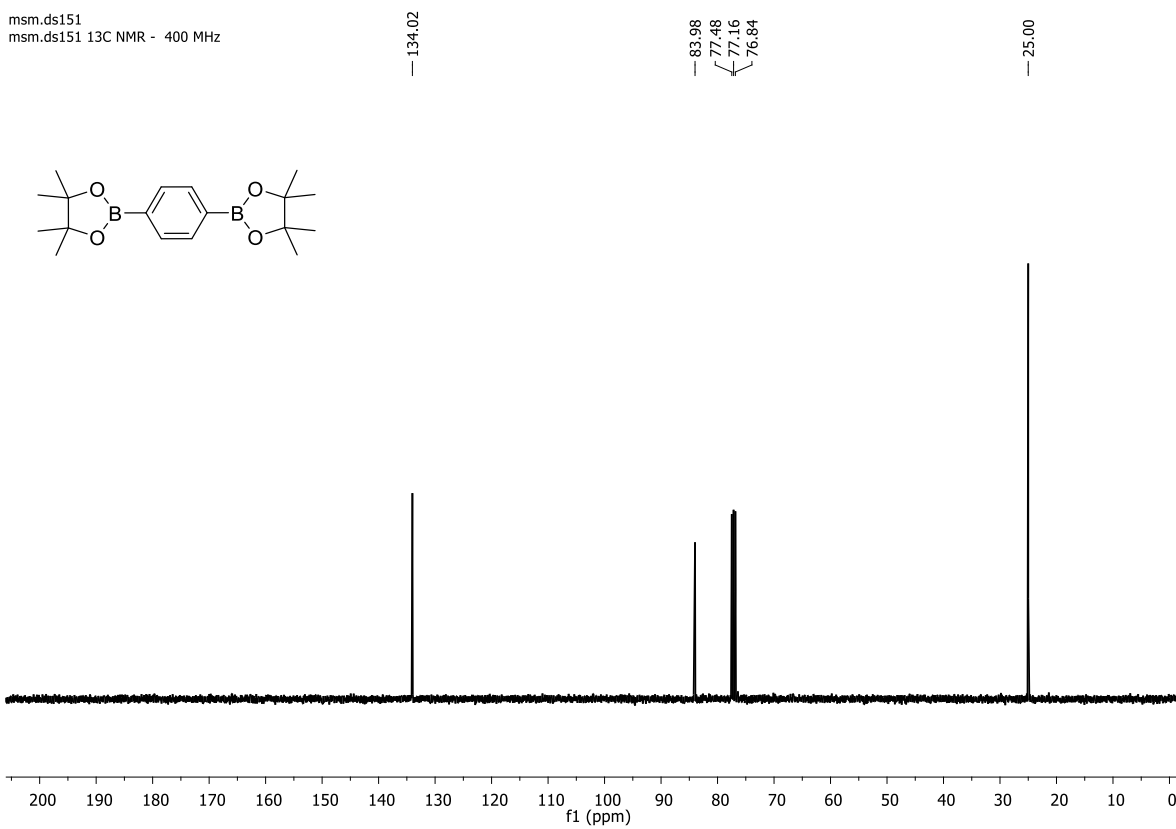

<sup>11</sup>B (160 MHz) NMR of **2p** in CDCl<sub>3</sub>

11B  
msm / ds / 151 (b) - 11B -500mhz

— 31.01

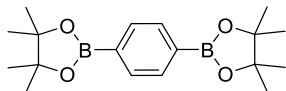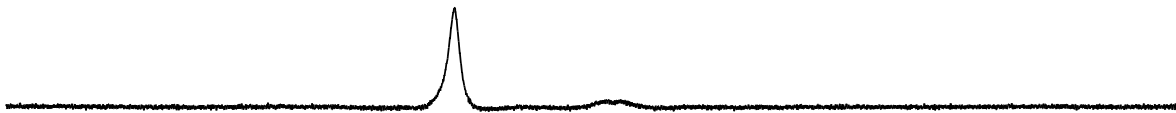

120 110 100 90 80 70 60 50 40 30 20 10 0 -10 -20 -30 -40 -50 -60 -70 -80 -90 -110  
f1 (ppm)

<sup>1</sup>H (400 MHz) and <sup>13</sup>C (101 MHz) NMR of **2q** in CDCl<sub>3</sub>

<sup>1</sup>H  
msm.ds184b 1H NMR - 400 MHz

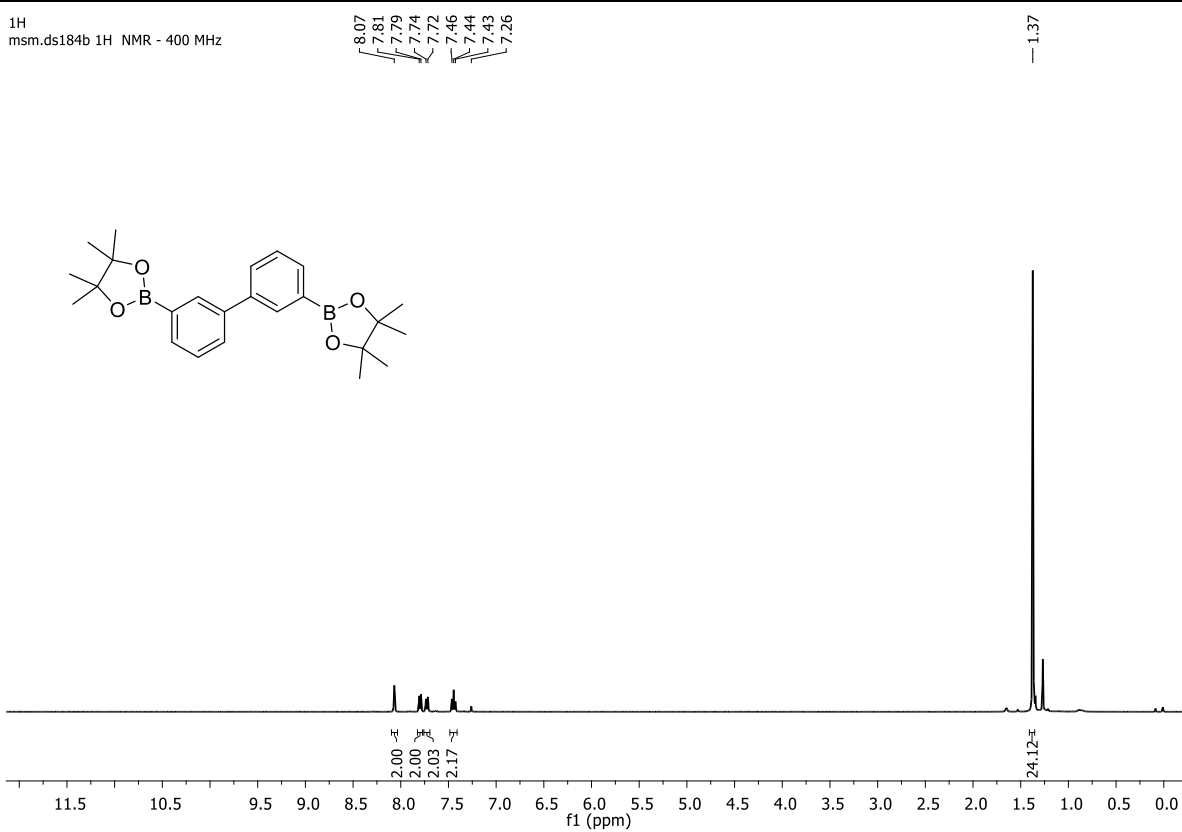

<sup>13</sup>C  
msm.ds184b 13C NMR - 400 MHz

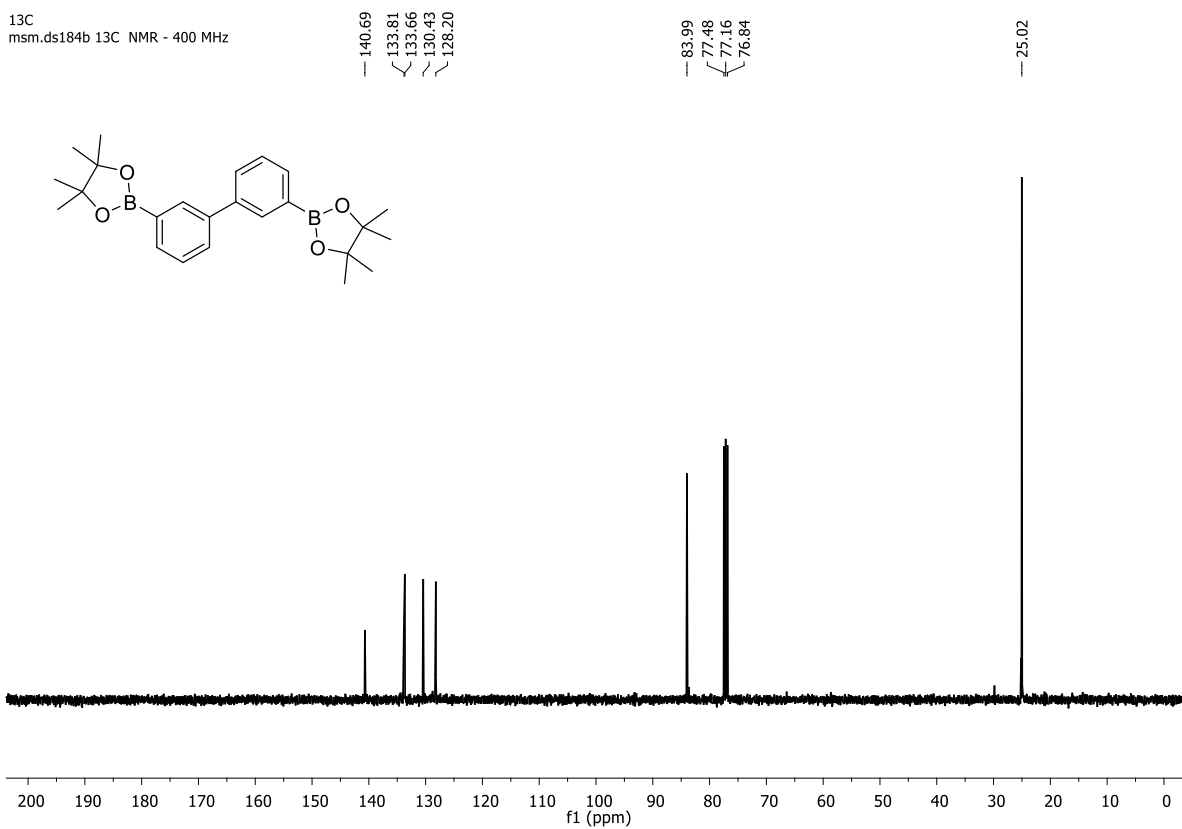



<sup>11</sup>B (160 MHz) NMR of **2q** in CDCl<sub>3</sub>

11B  
msm / ds / 184 (bb) - 11B - 500mhz

→ 31.16

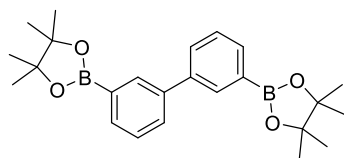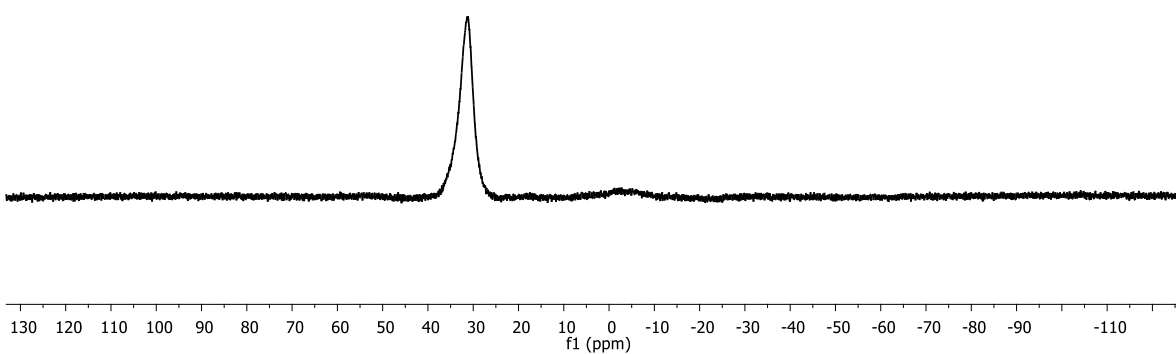

<sup>1</sup>H (400 MHz) and <sup>13</sup>C (101 MHz) NMR of **2r** in CDCl<sub>3</sub>

msm.ds230b  
msm.ds230b -1h- 400 MHz

7.81  
7.79  
7.74  
7.73  
7.71  
7.26

2.02  
1.97  
1.39  
1.10  
1.00  
0.76  
0.74  
0.72  
0.57  
0.50

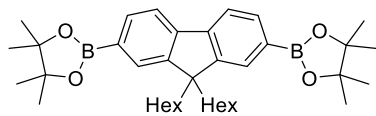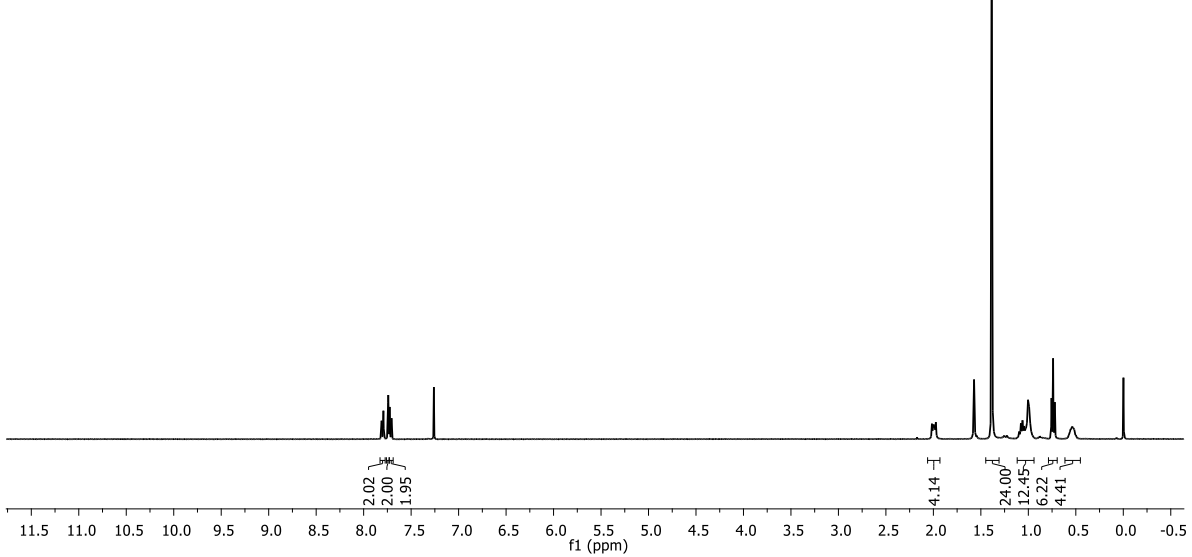

msm.ds230b13c  
msm.ds230b-13c 400 MHz

150.61  
144.06  
133.78  
129.05  
119.52

83.86  
77.48  
77.16  
76.84

55.32

40.23

31.58

29.76

25.08

23.70

22.71

14.16

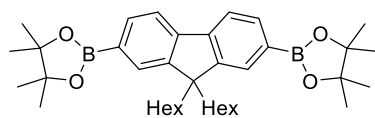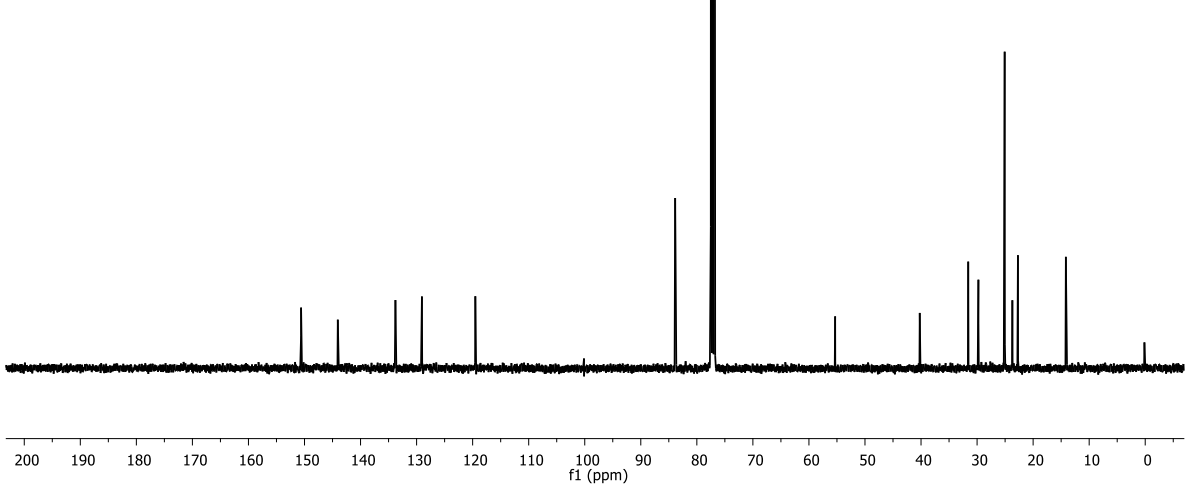

$^1\text{H}$  (400 MHz) and  $^{13}\text{C}$  (101 MHz) NMR of **3a** in  $\text{CDCl}_3$

$^1\text{H}$   
msm.ds282b-1h NMR - 400 MHz

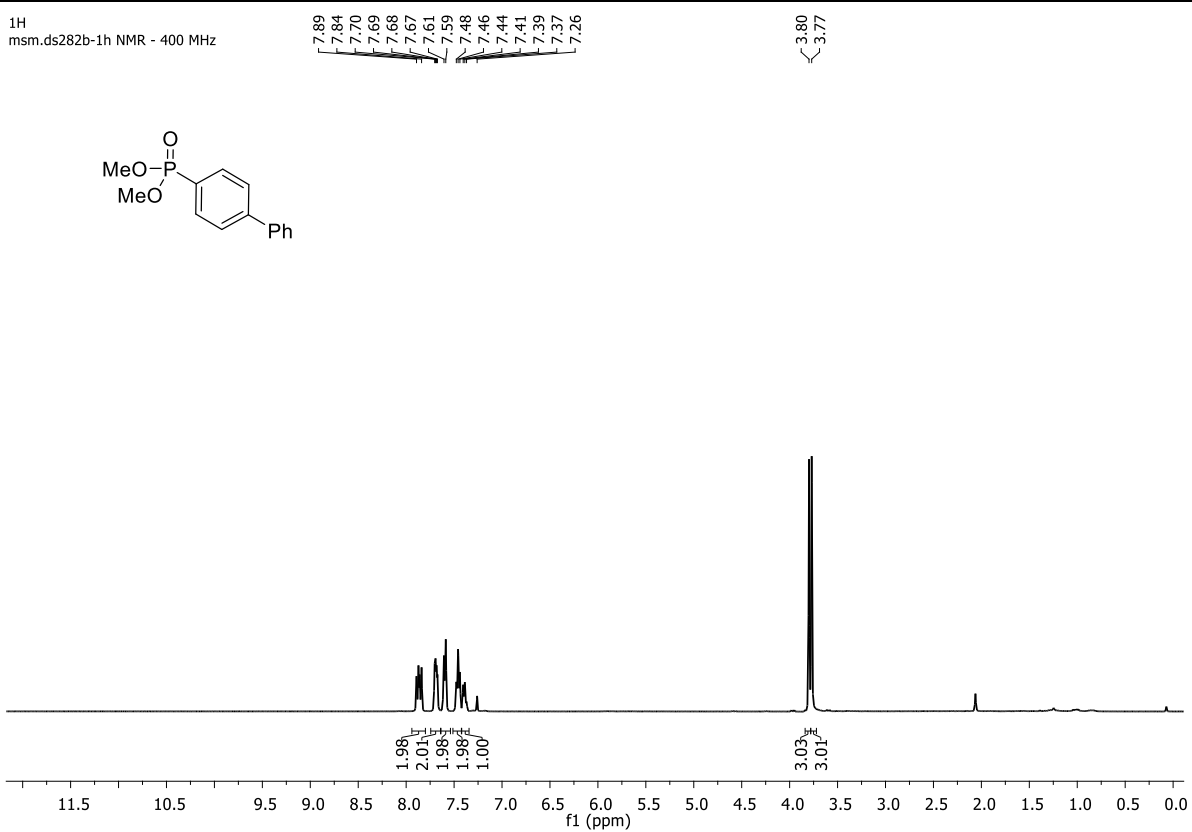

msm.ds282c  
msm / ds / 282 (c) -  $^{13}\text{C}$  - 400 MHz

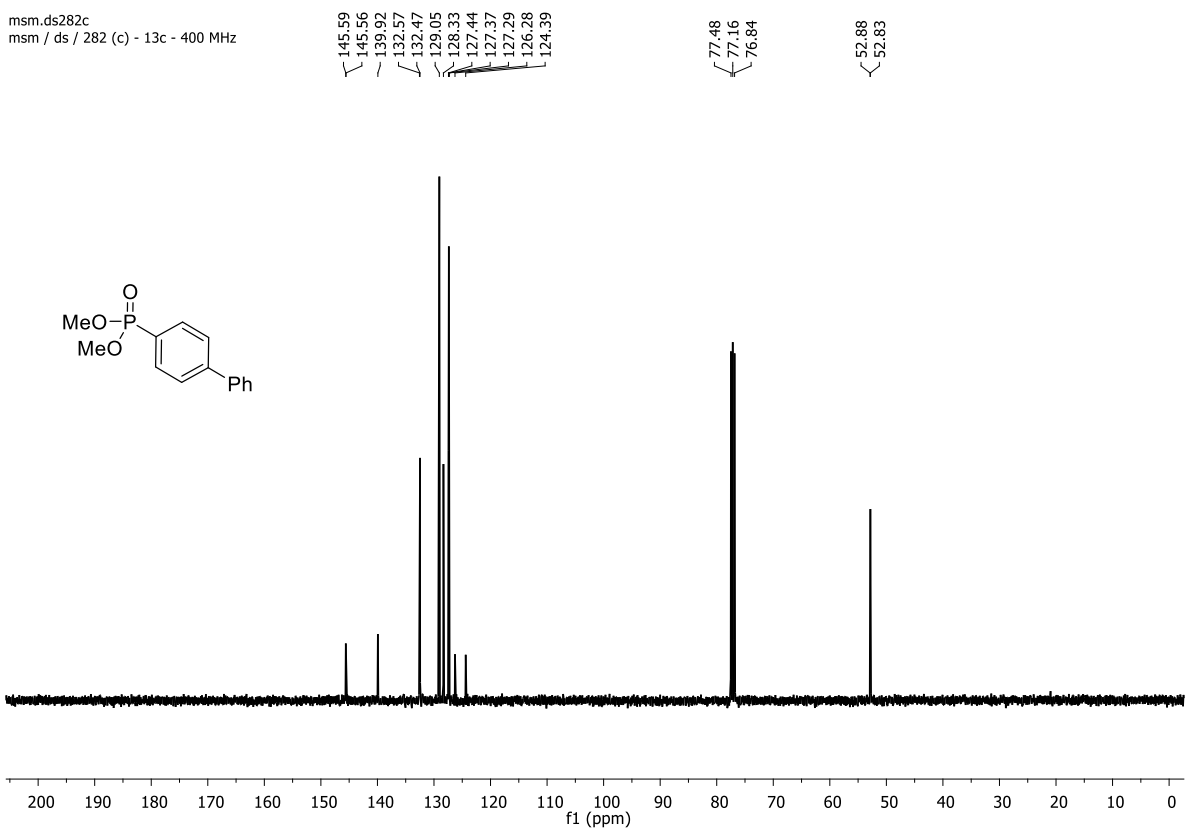

<sup>31</sup>P NMR (202 MHz) of **3a** in CDCl<sub>3</sub>

31P  
msm.ds282(r) - 31p - 500mhz

22.51

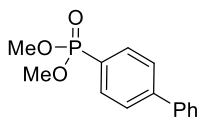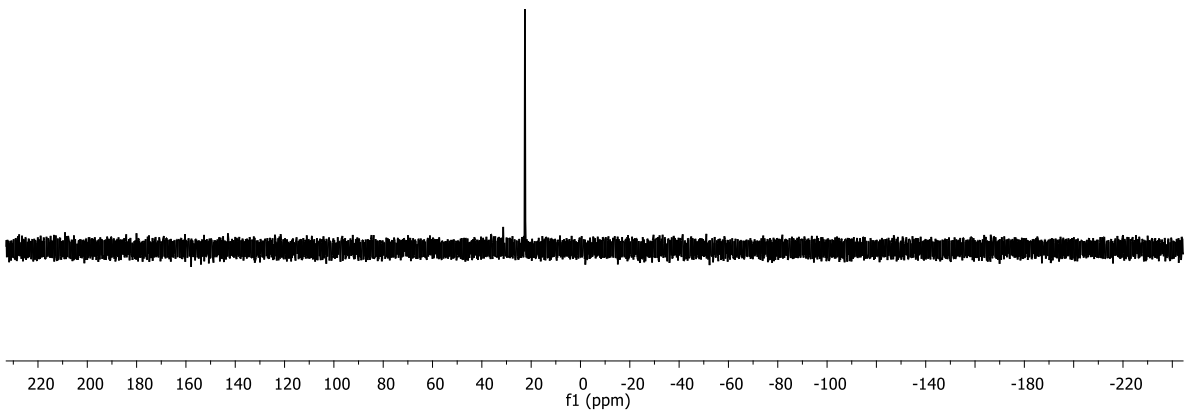

<sup>1</sup>H (400 MHz) and <sup>13</sup>C (101 MHz) NMR of **3b** in CDCl<sub>3</sub>

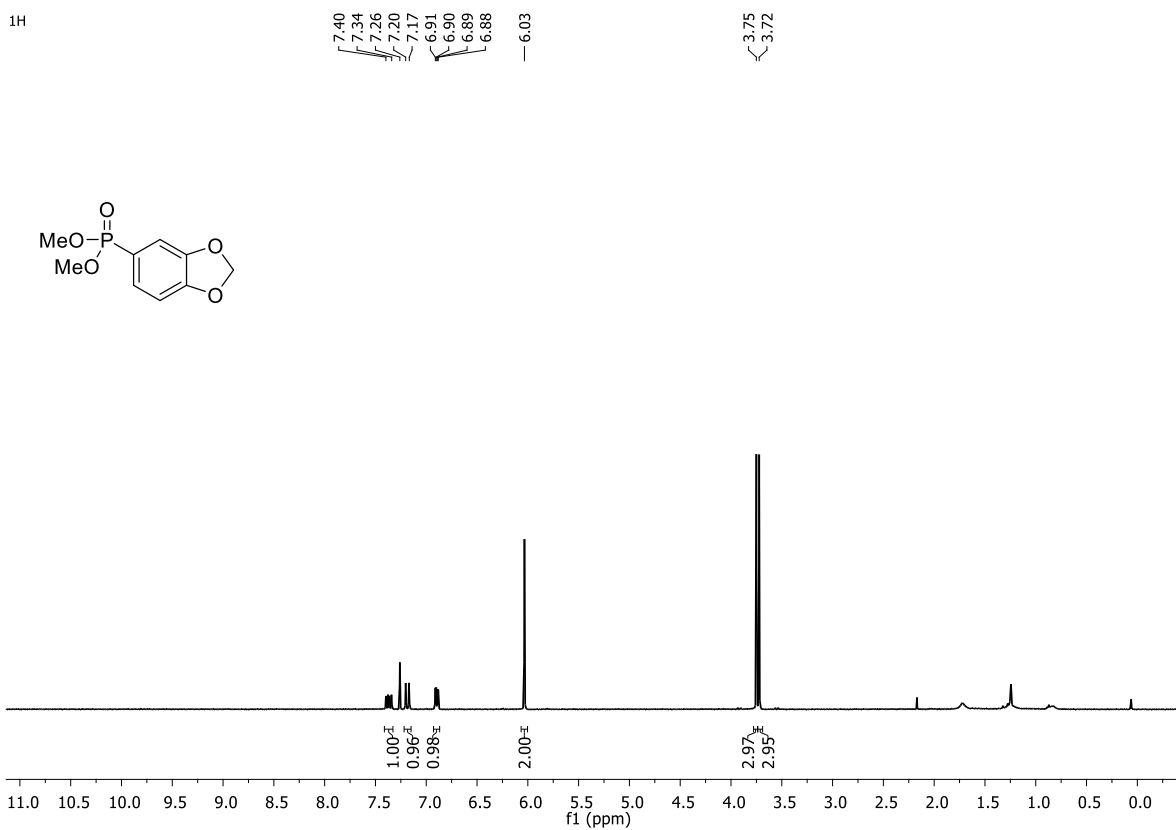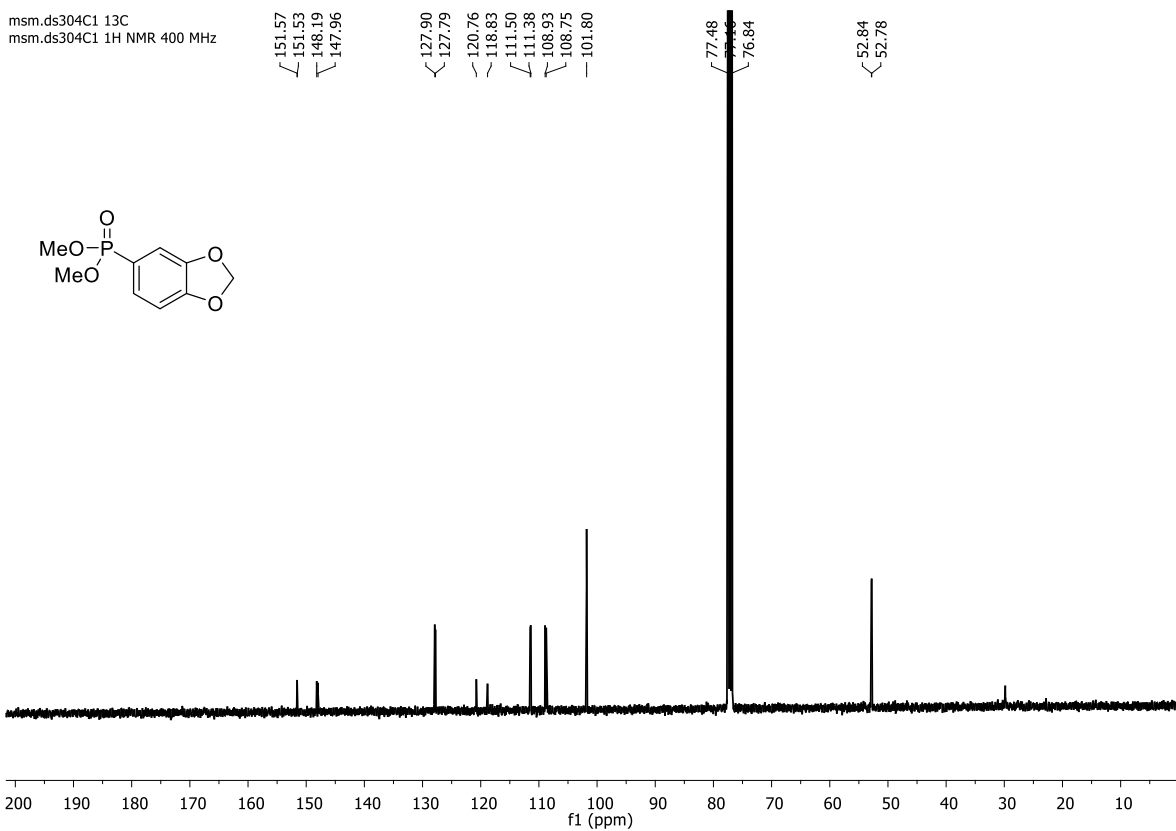

<sup>31</sup>P (202 MHz) NMR of **3b** in CDCl<sub>3</sub>

msm.ds304p1  
msm / ds / 304p1 - 31p - 500mhz

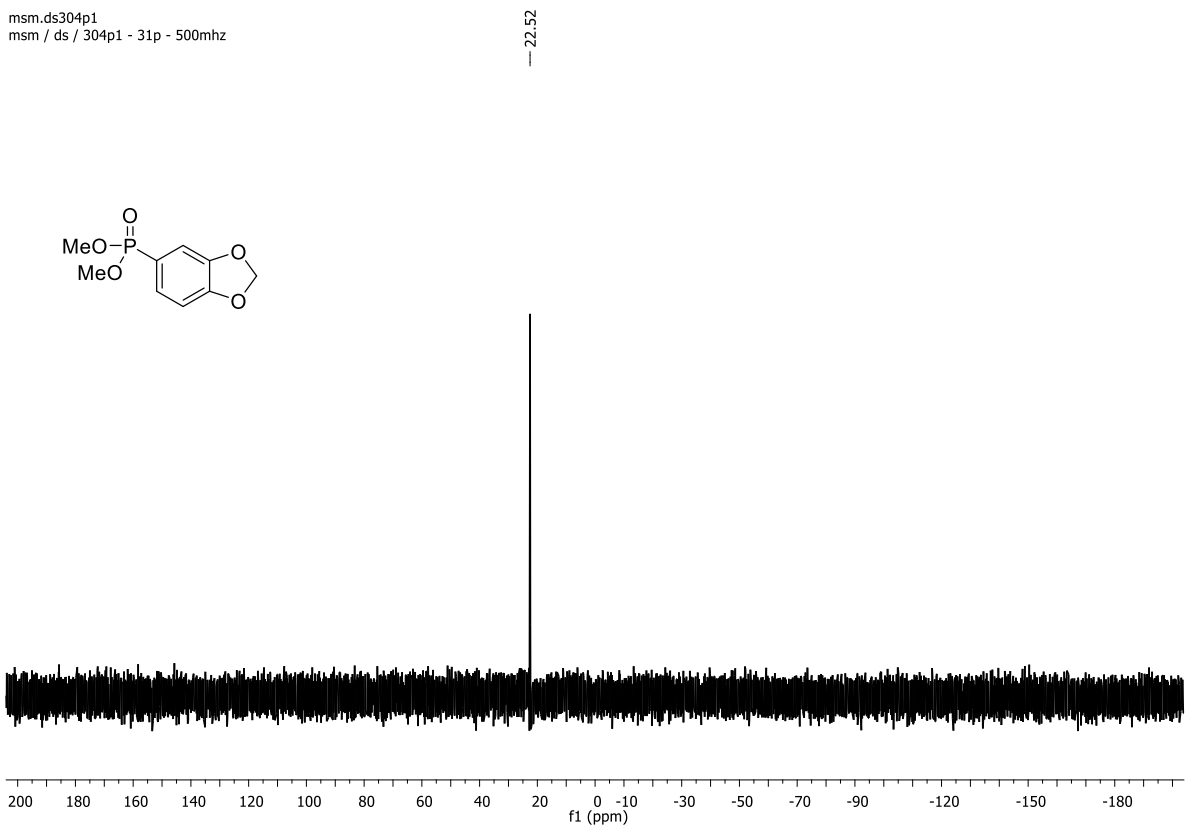

<sup>1</sup>H (400 MHz) and <sup>13</sup>C (101 MHz) NMR of **3c** in CDCl<sub>3</sub>

<sup>1</sup>H  
msm.ds295b 1H NMR 400 MHz

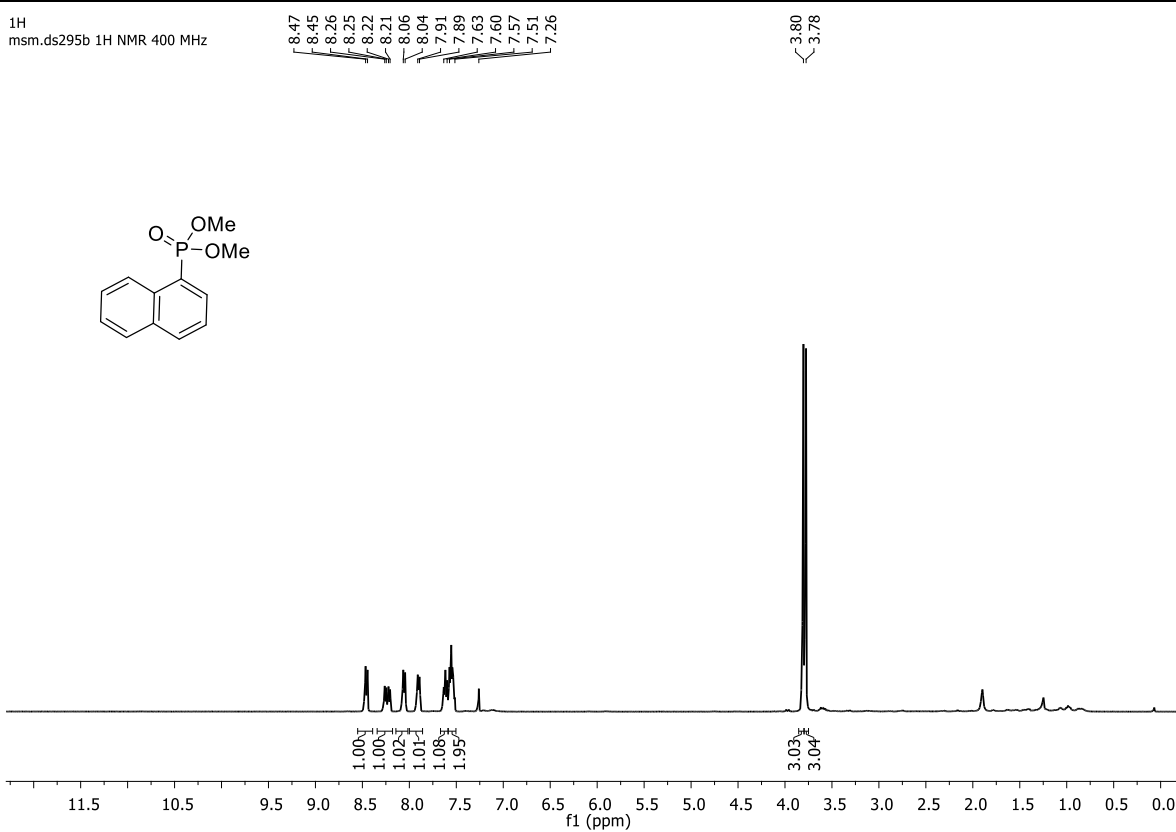

<sup>13</sup>C  
msm.ds295b 13C NMR 400 MHz

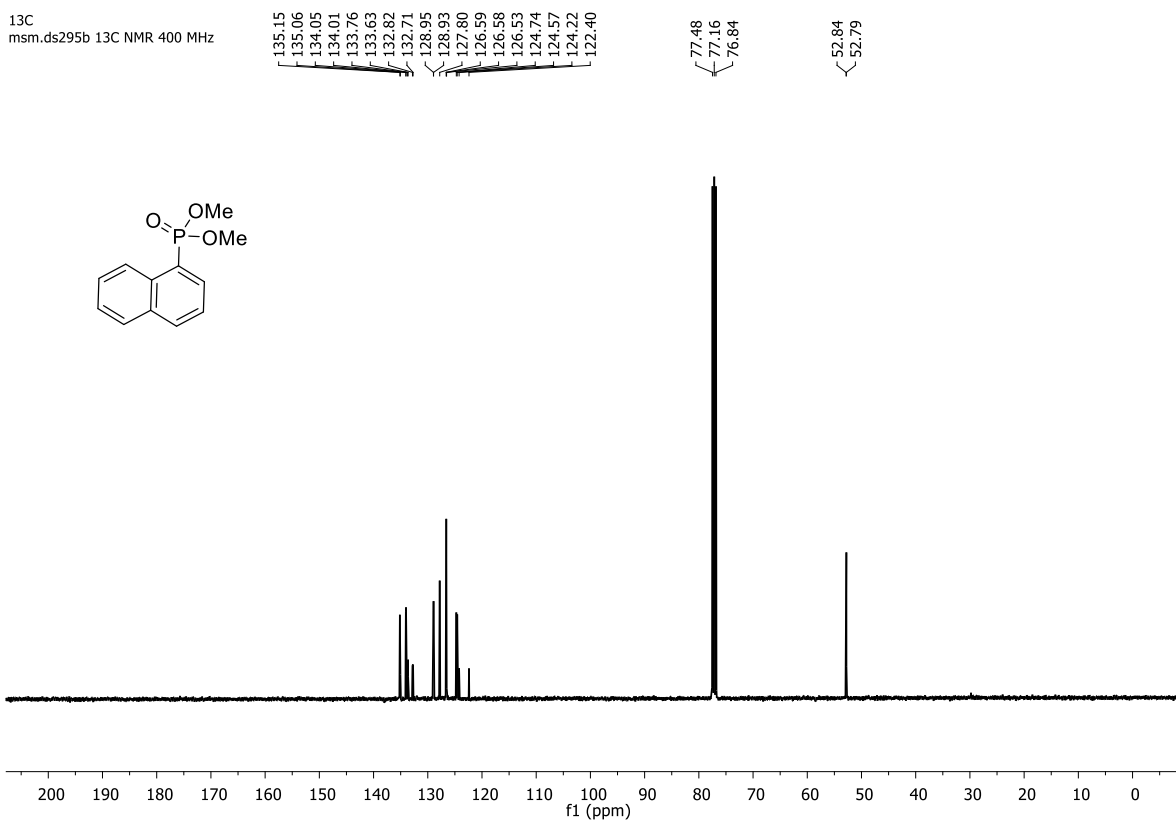

<sup>31</sup>P (202 MHz) NMR of **3c** in CDCl<sub>3</sub>

31P  
msm / ds / 295 (p1) - 31p - 500mhz

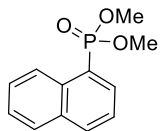

-22.98

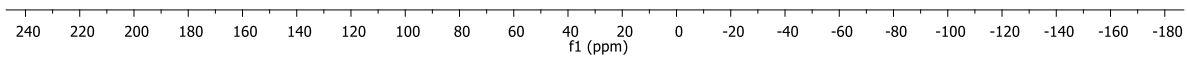



<sup>1</sup>H (400 MHz) and <sup>13</sup>C (126 MHz) NMR of **3d** in CDCl<sub>3</sub>

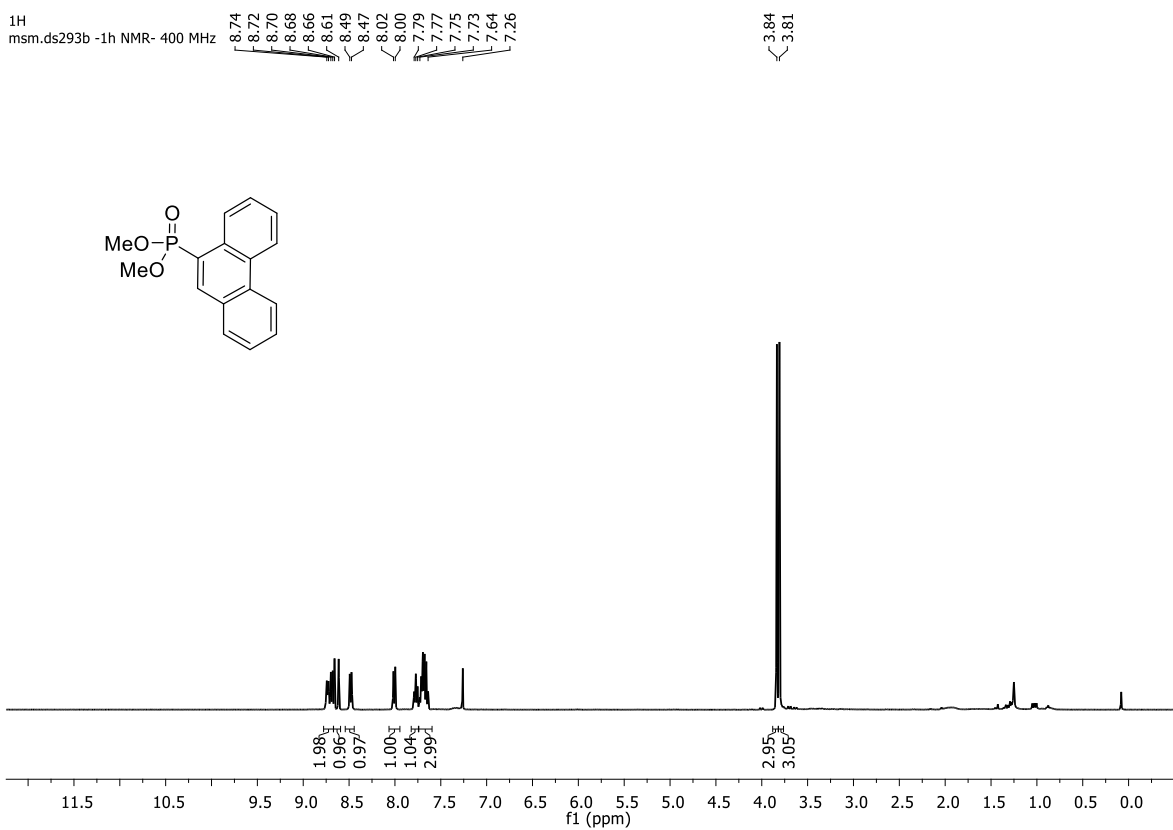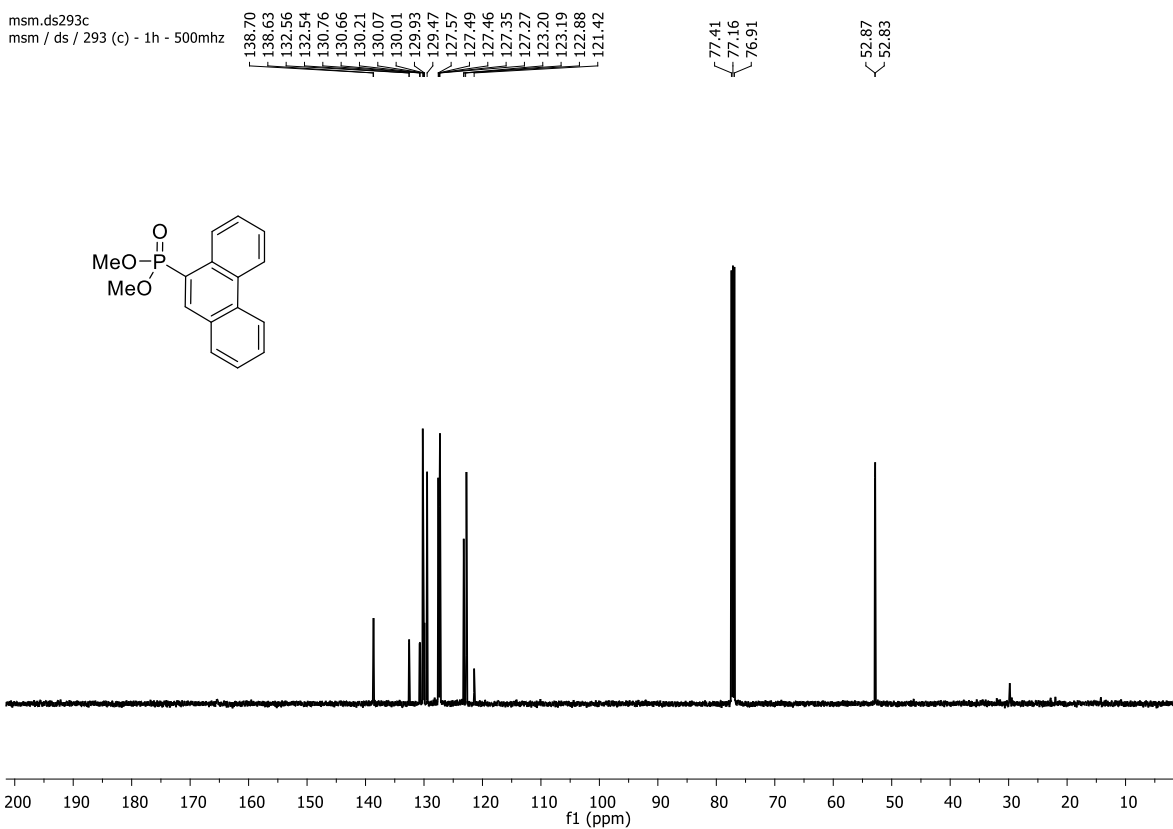

<sup>31</sup>P (202 MHz) NMR of **3d** in CDCl<sub>3</sub>

<sup>31</sup>P NMR (202 MHz, CDCl<sub>3</sub>) δ 23.29.  
msm / ds / 293 (p1) - 31p - 500mhz

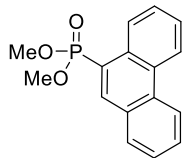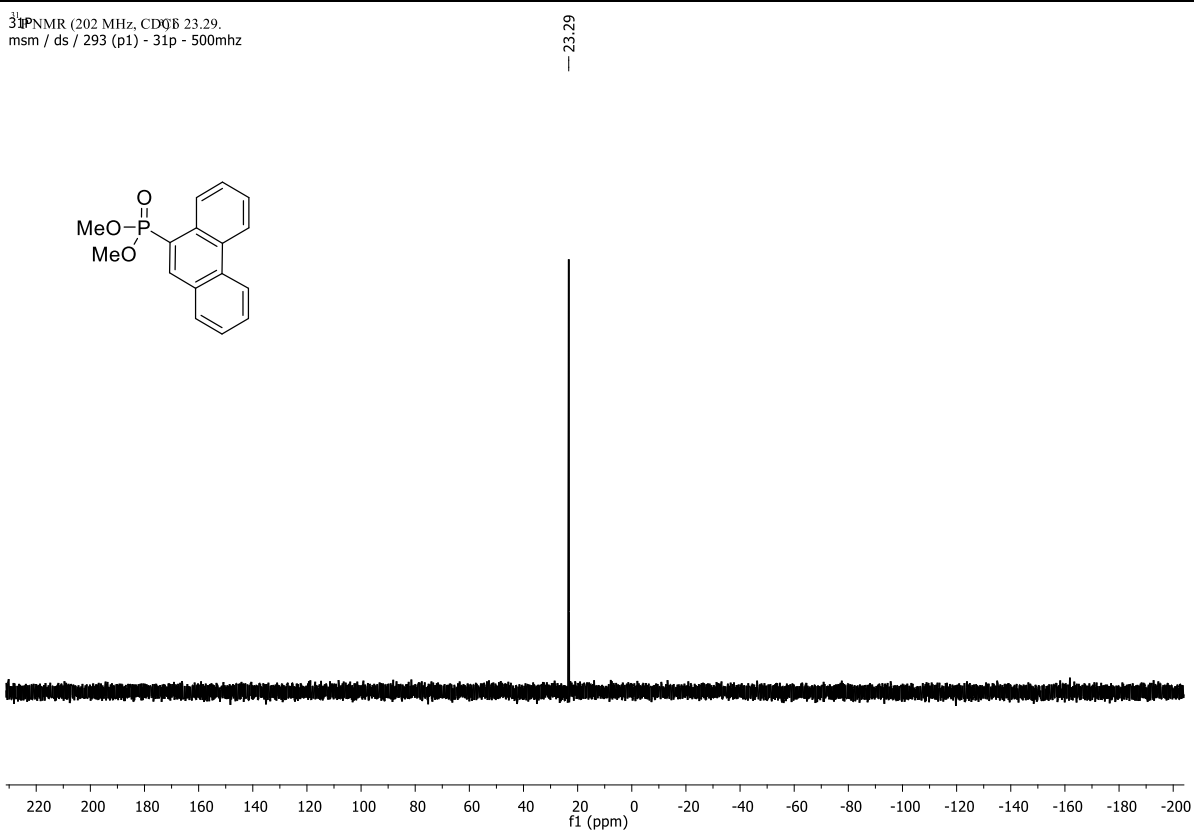

<sup>1</sup>H (400 MHz) and <sup>13</sup>C (101 MHz) NMR of **3e** in CDCl<sub>3</sub>

DS301  
msm.ds301 1H NMR- 400 MHz

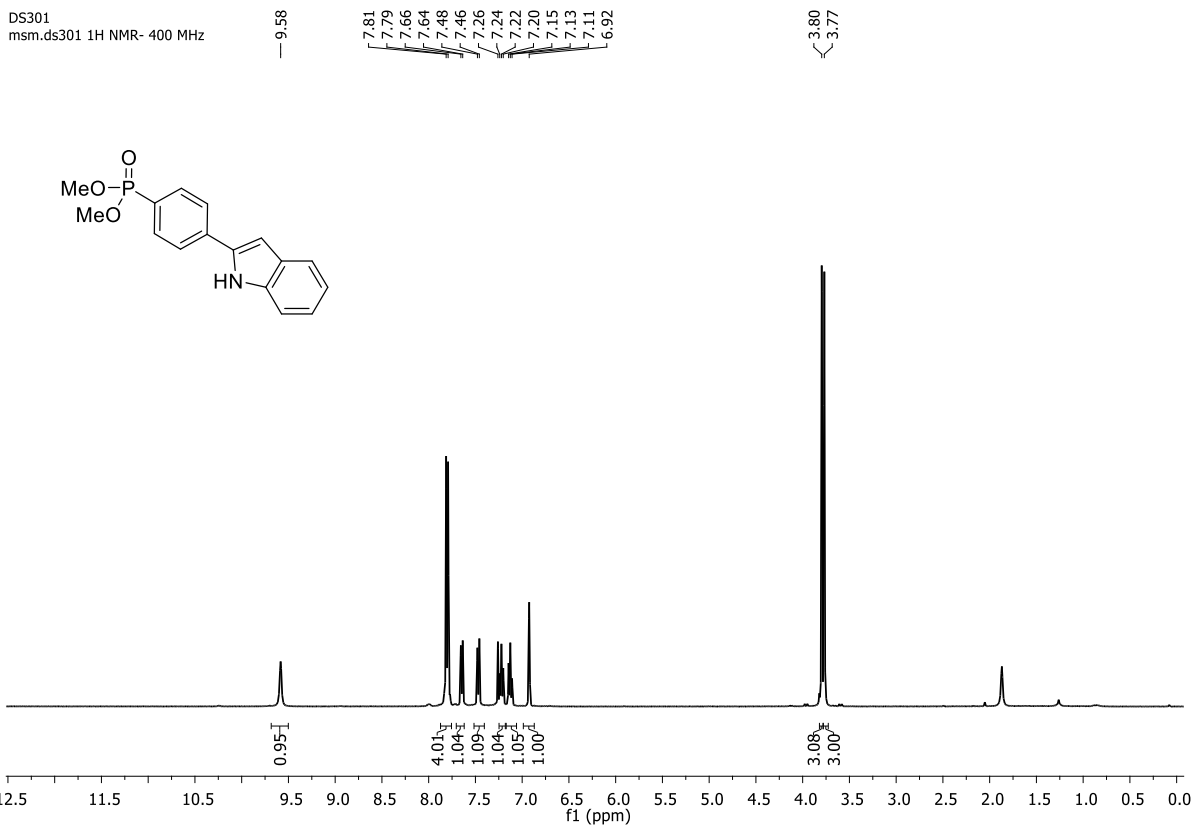

DS301  
msm.ds301 13C NMR- 400 MHz

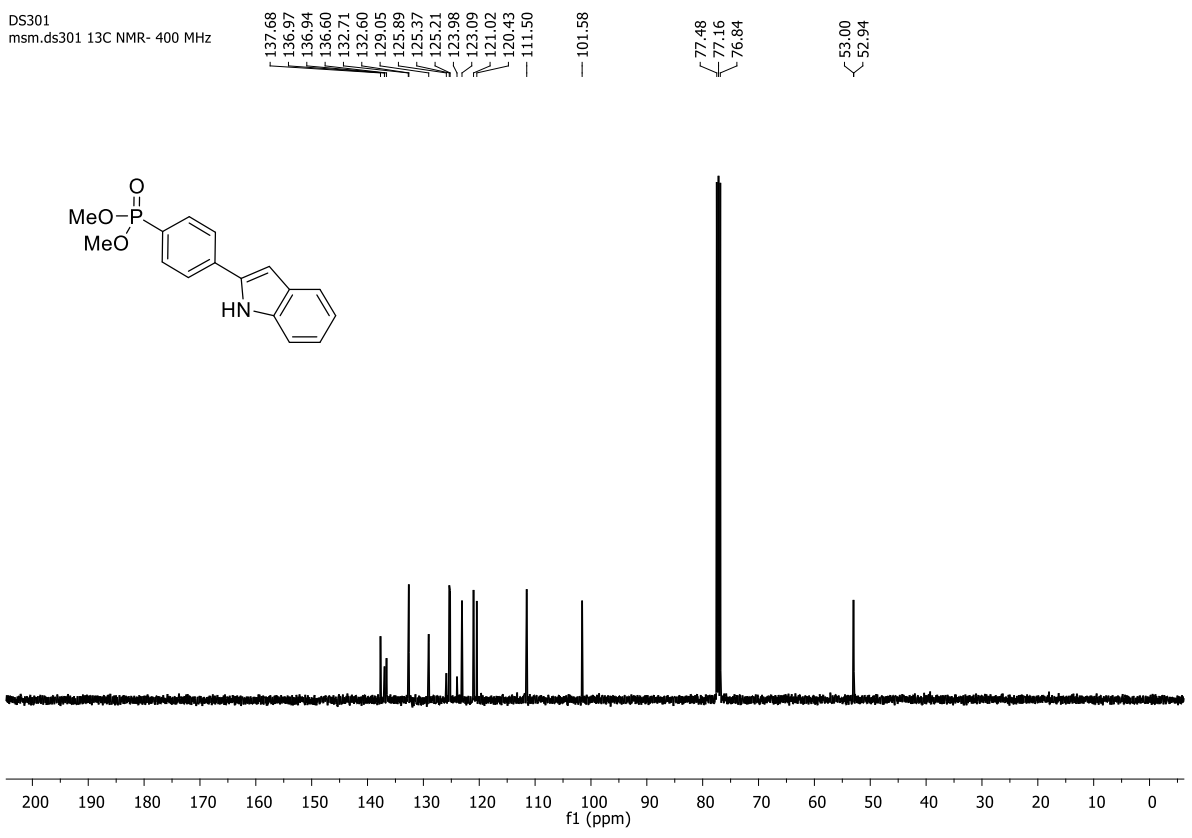

<sup>31</sup>P (202 MHz) NMR of **3e** in CDCl<sub>3</sub>

msm.ds301p  
msm / ds / 301 (p)- 31p - 500mhz

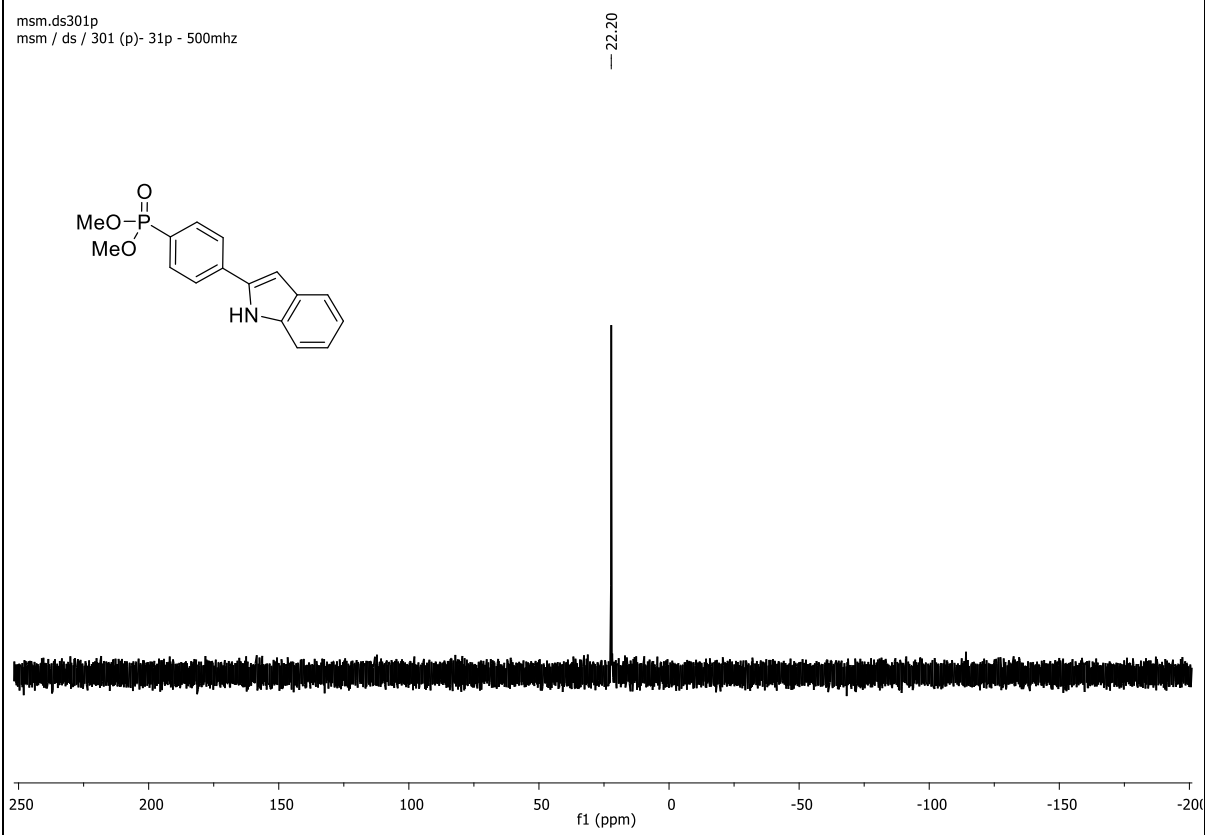

<sup>1</sup>H (400 MHz) and <sup>13</sup>C (126 MHz) NMR of **3f** in CDCl<sub>3</sub>

msm.ds298F1  
msm.ds298F1-1h - 400 MHz nmr

8.20  
8.16  
7.38  
7.26  
7.22  
7.21  
7.11  
7.05  
6.64  
-5.35  
3.77  
3.74

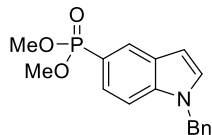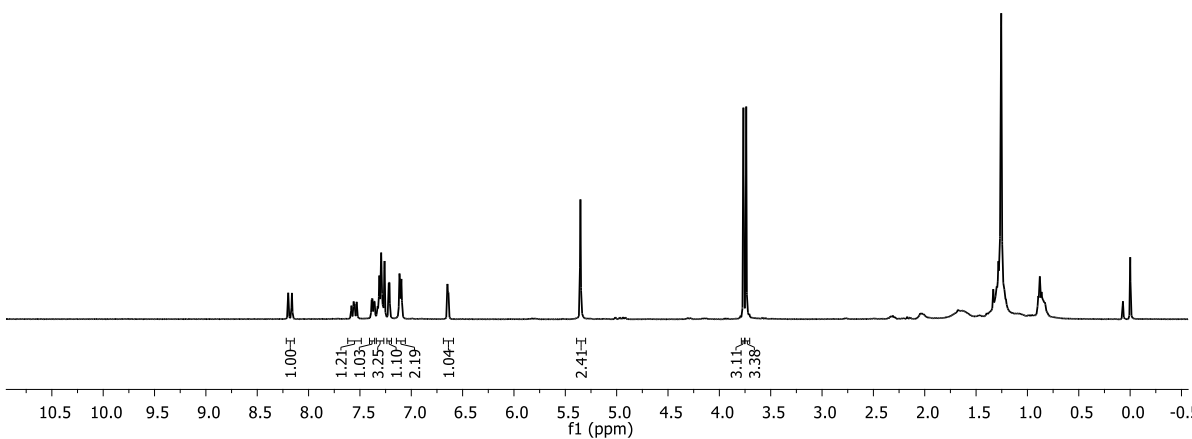

msm.ds298c1  
msm / ds / 298 (c1)

138.57  
138.55  
136.94  
129.84  
129.04  
128.05  
119.95  
119.95  
115.87  
110.24  
110.11  
103.09  
103.08  
77.41  
77.41  
76.91  
52.72  
52.68  
50.43

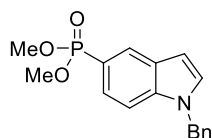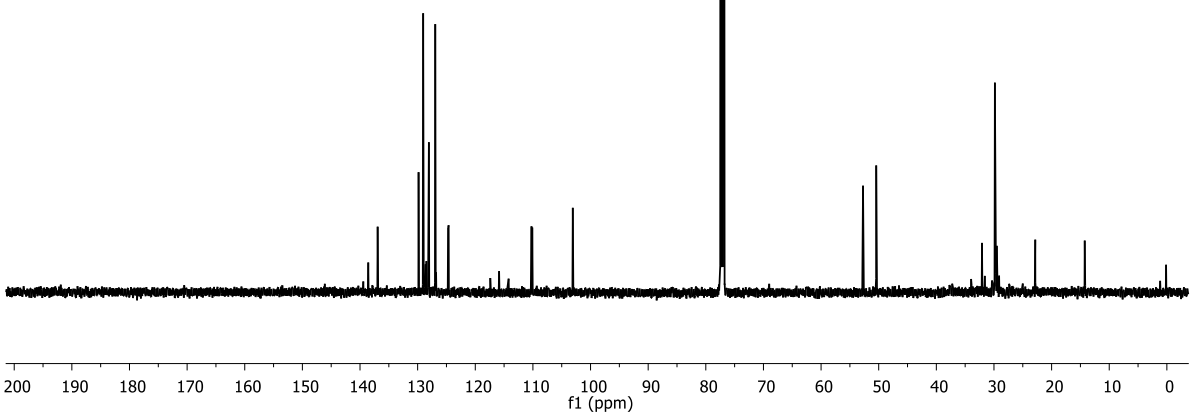

<sup>31</sup>P (202 MHz) NMR of **3f** in CDCl<sub>3</sub>

msm.ds298p1  
msm / ds / 298p1 - 31p - 500mhz

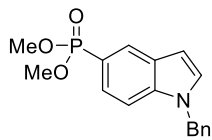

25.633

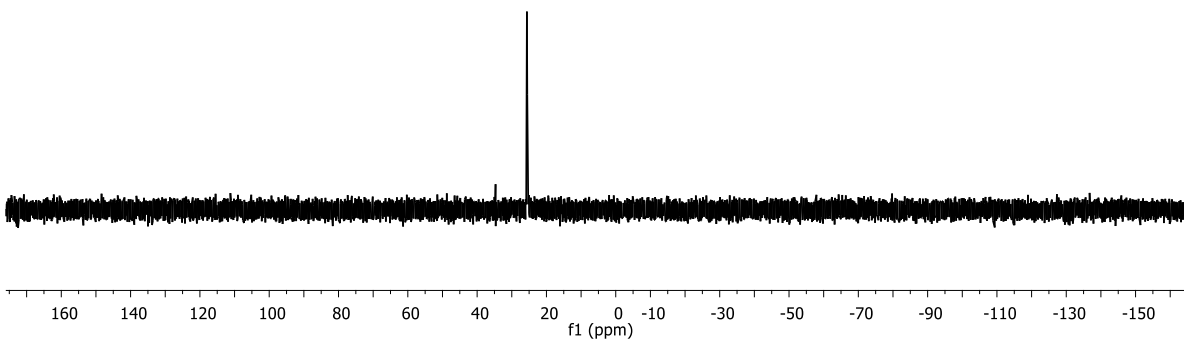

$^1\text{H}$  (400 MHz) and  $^{13}\text{C}$  (101 MHz) NMR of **5a** in  $\text{CDCl}_3$

msm.ds96F  
msm.ds96F 1H 400mhz nmr

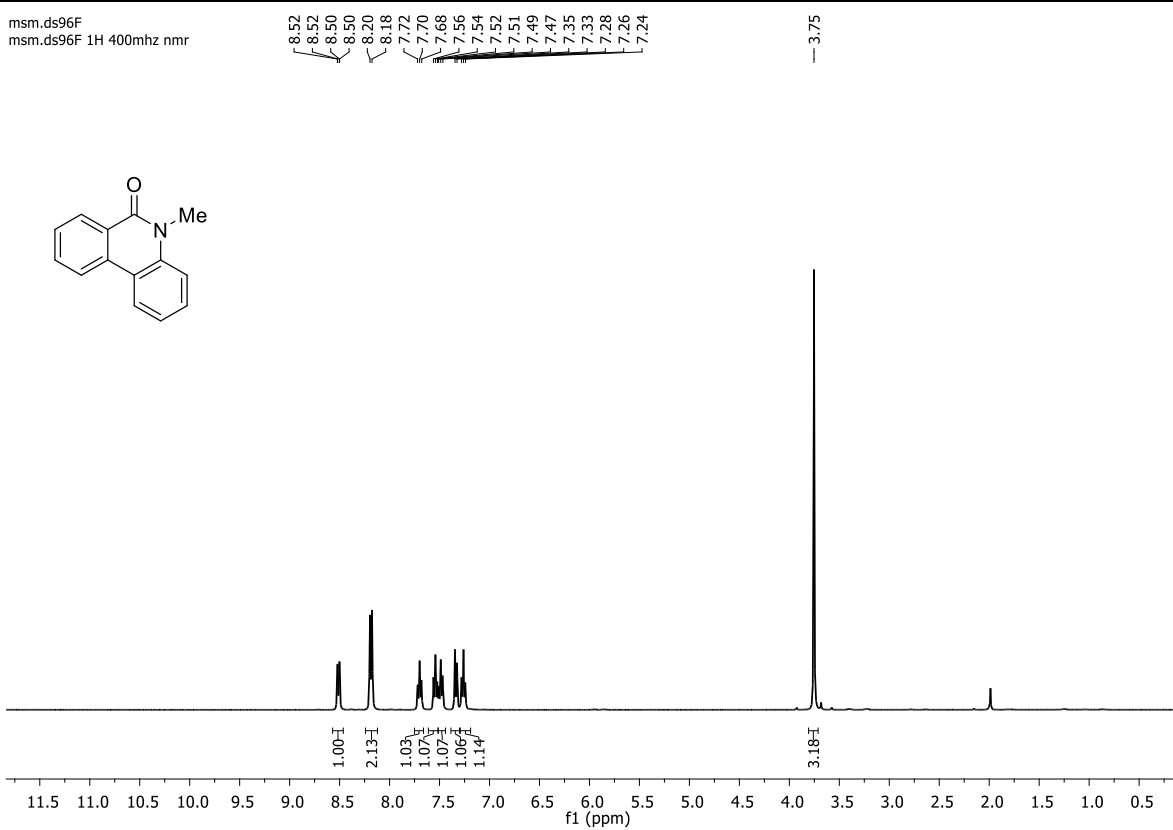

msm.ds96F  
msm.ds96F 13C 400mhz nmr

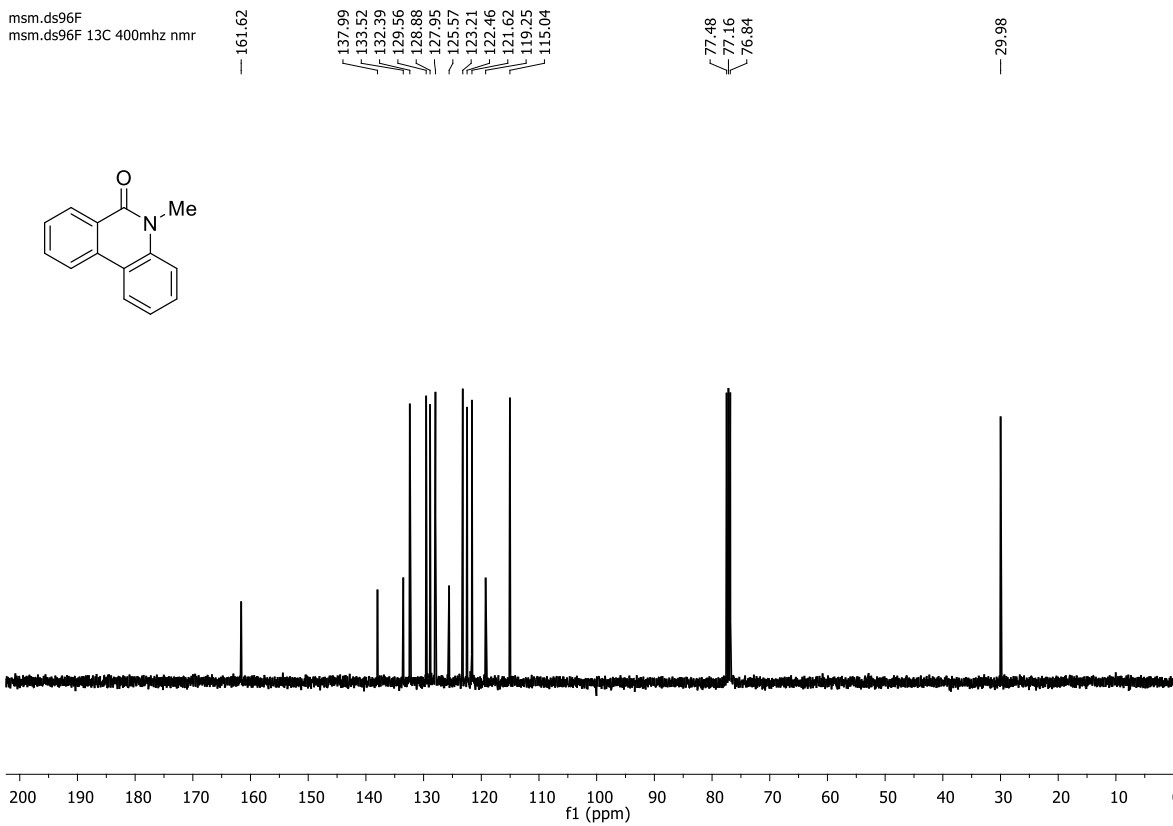

<sup>1</sup>H (400 MHz) and <sup>13</sup>C (101 MHz) NMR of **5b** in CDCl<sub>3</sub>

msm.ds211f  
msm.ds211f 1H NMR 400 MHz

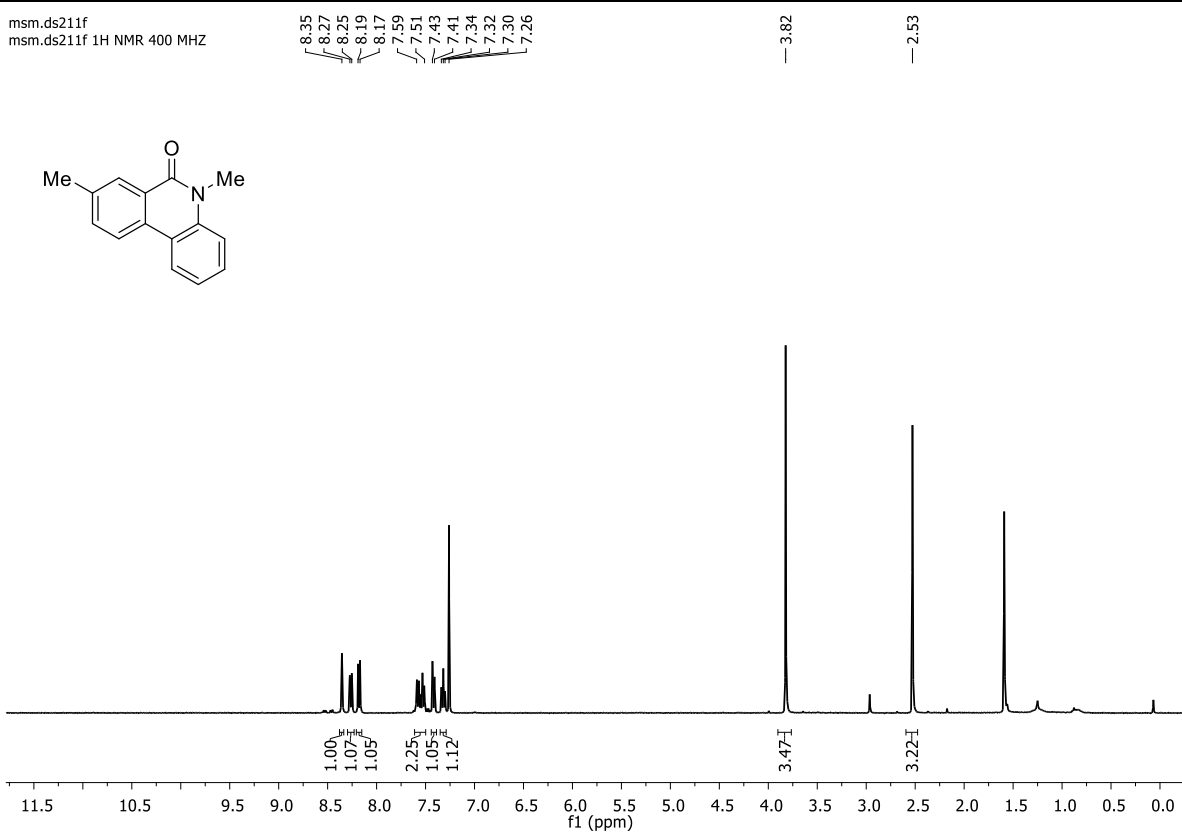

msm.ds211c  
msm / ds / 211 (c) - <sup>13</sup>C - NMR 400 MHz

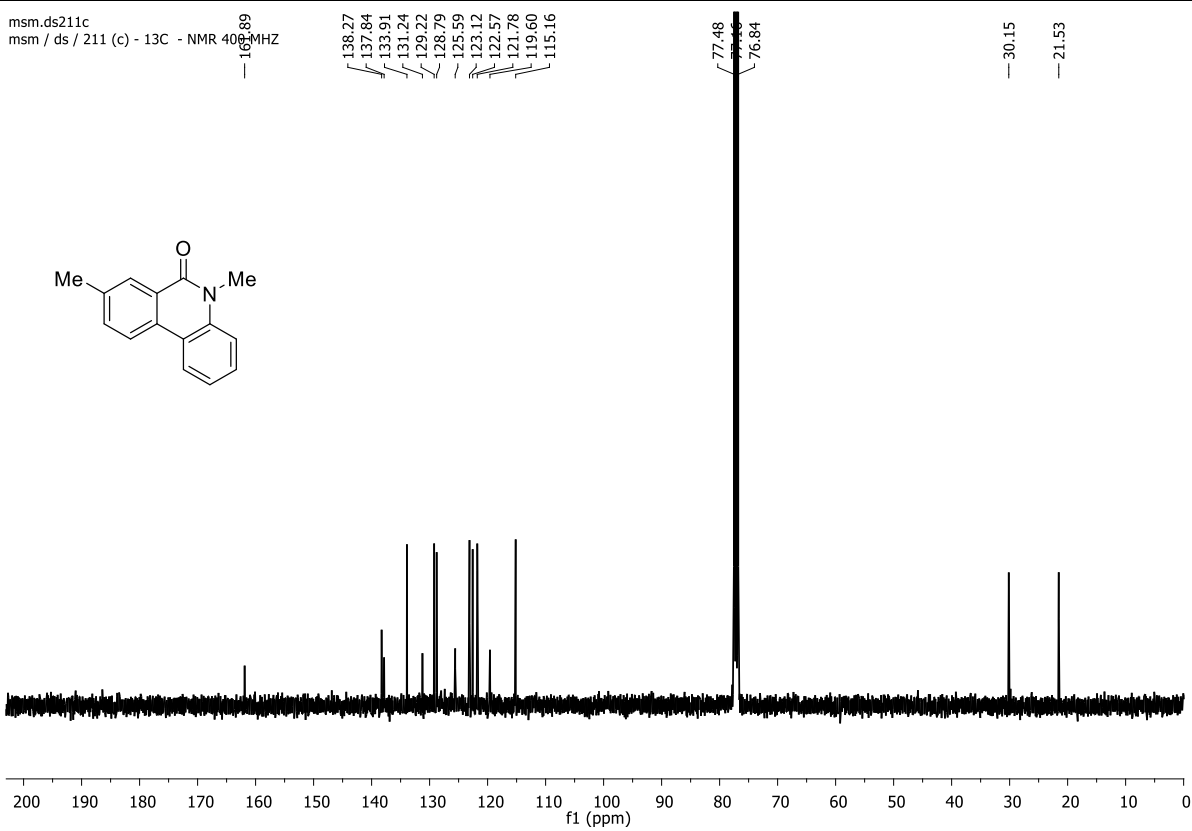



$^1\text{H}$  (400 MHz) and  $^{13}\text{C}$  (126 MHz) NMR of **5c** in  $\text{CDCl}_3$

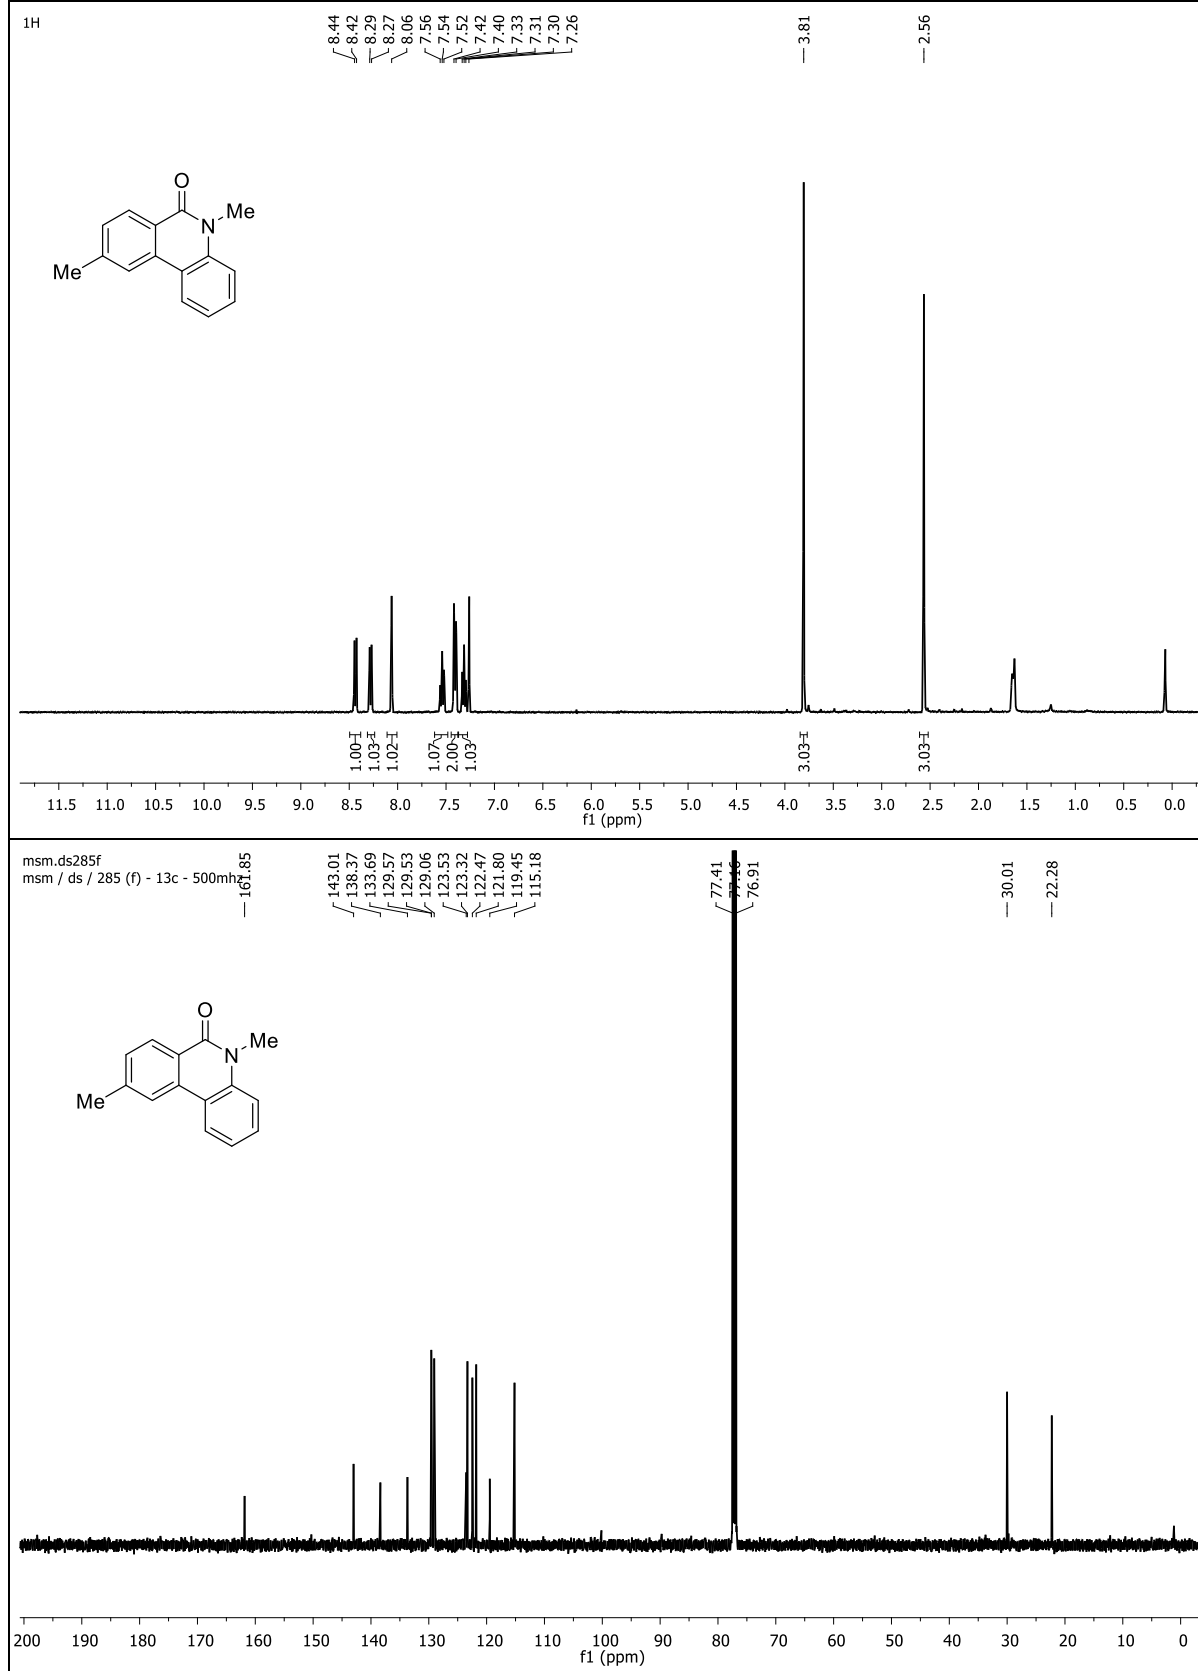

<sup>1</sup>H (400 MHz) and <sup>13</sup>C (126 MHz) NMR of **5d** in CDCl<sub>3</sub>

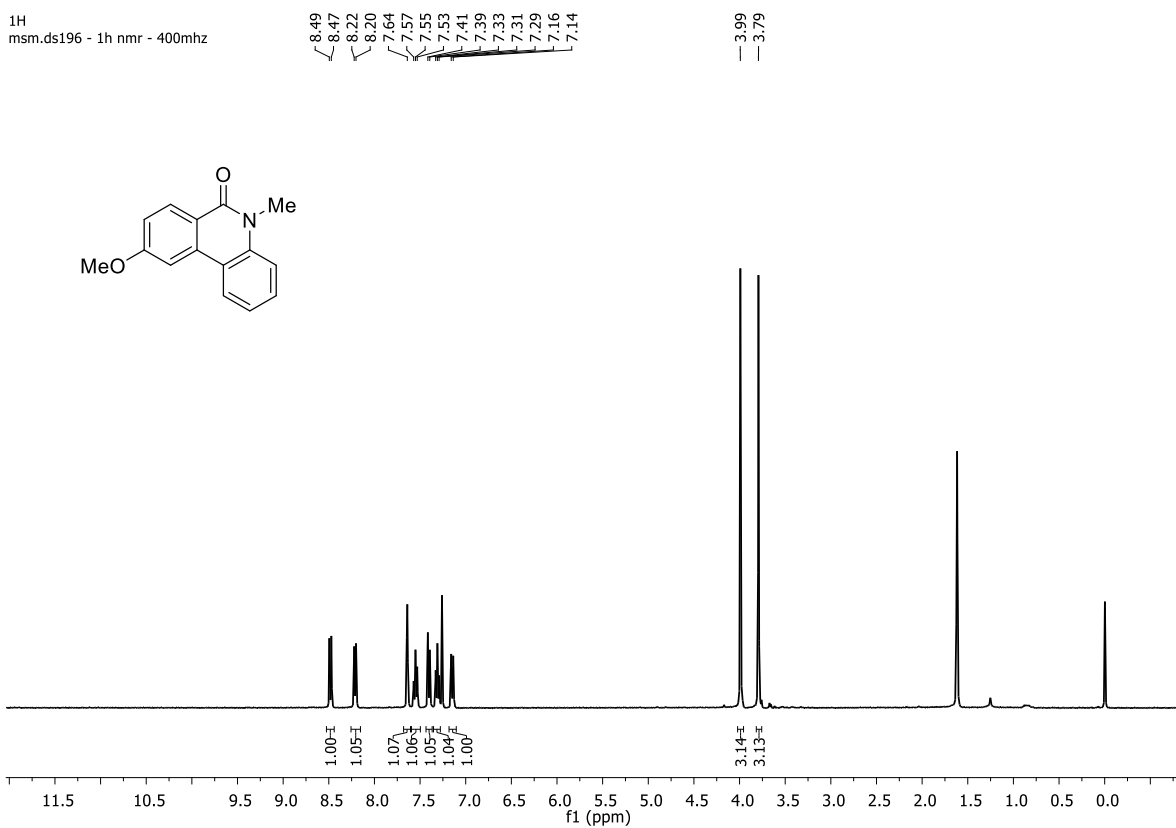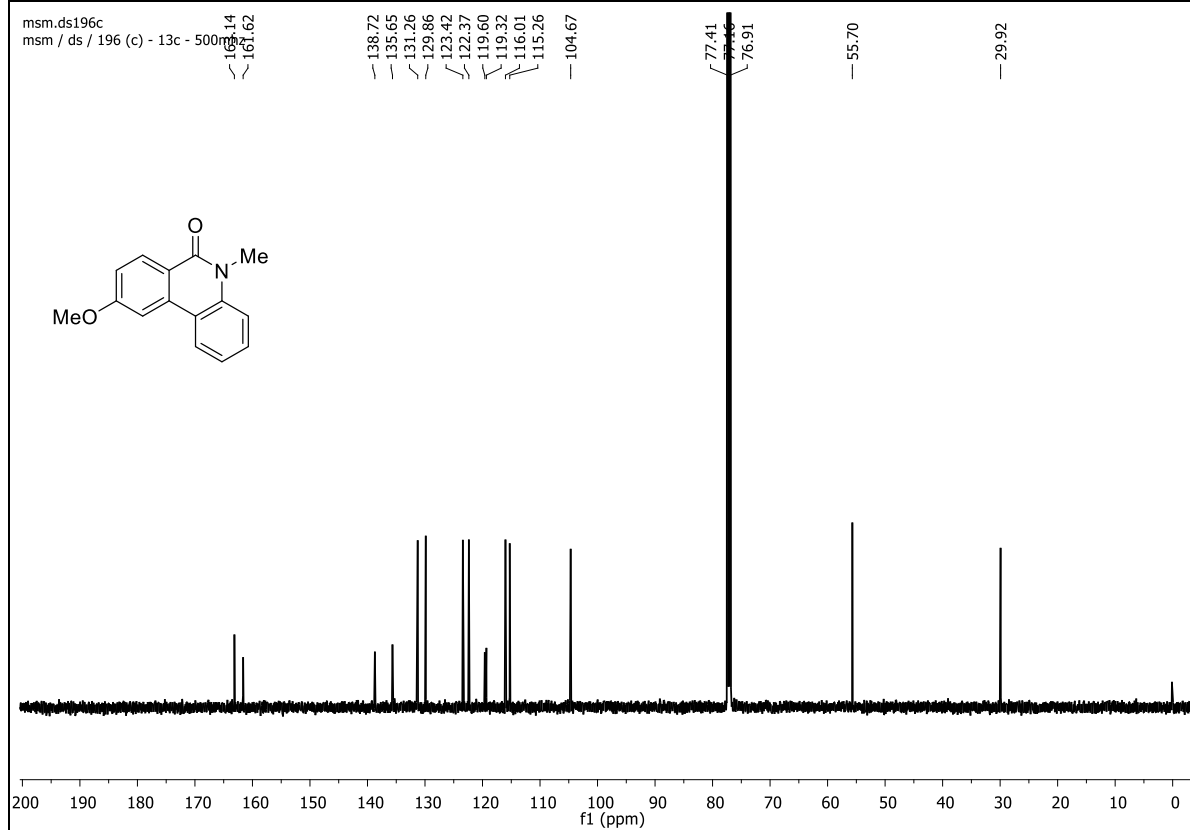

$^1\text{H}$  (400 MHz) and  $^{13}\text{C}$  (126 MHz) NMR of **5e** in  $\text{CDCl}_3$

1H  
msm.ds202r -1H- NMR 400MHz

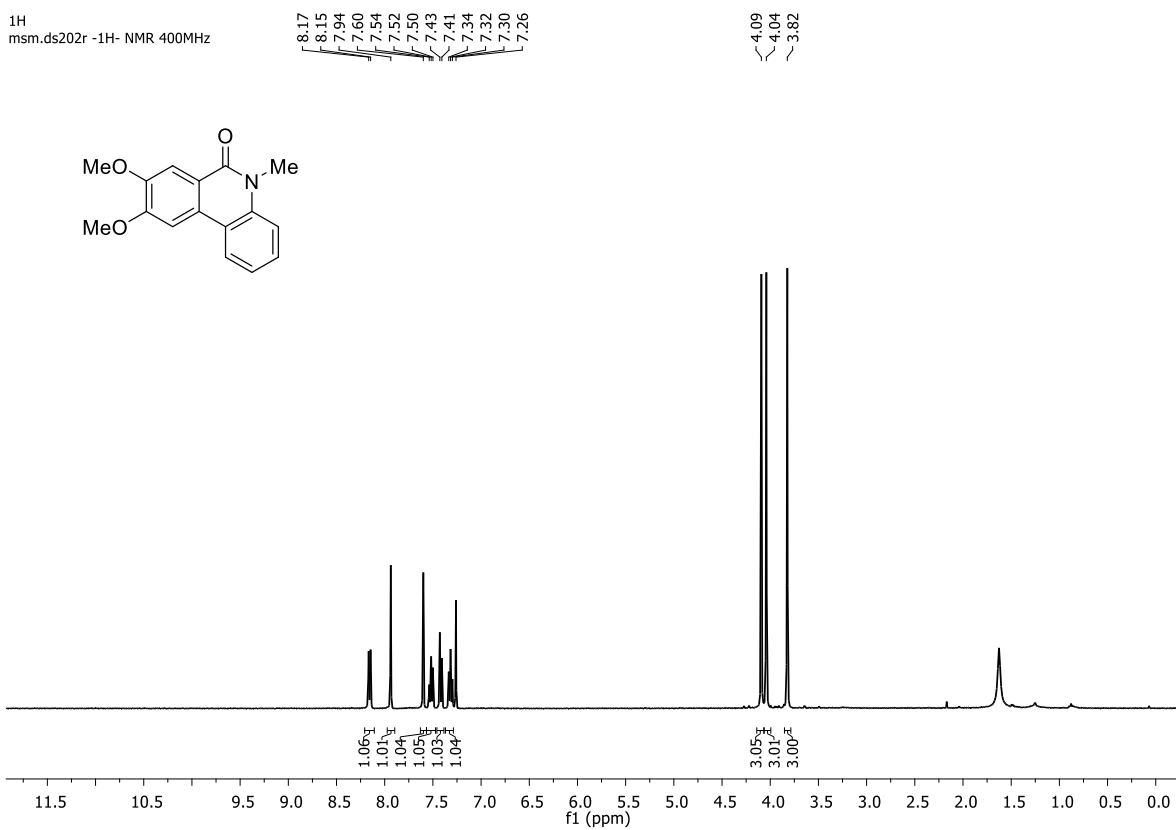

msm.ds202c  
msm / ds / 202 (c) - 13c - 500mhz

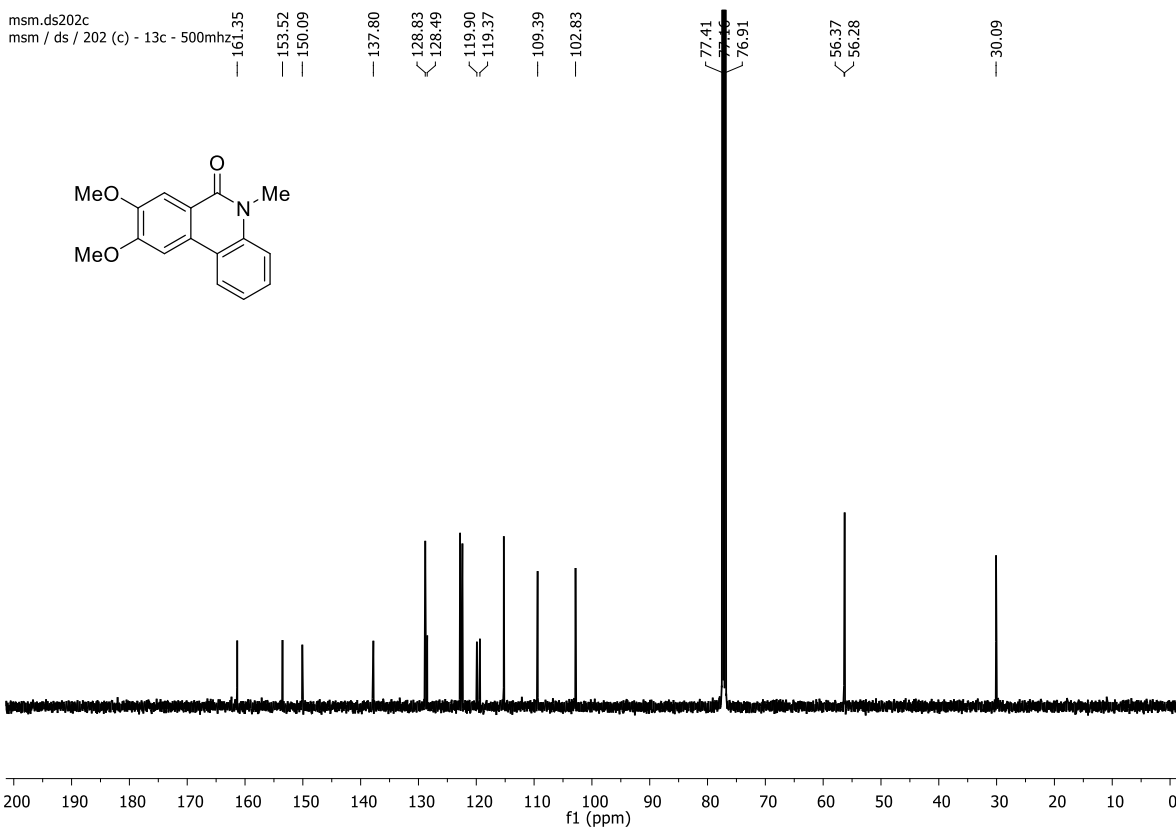

$^1\text{H}$  (400 MHz) and  $^{13}\text{C}$  (101 MHz) NMR of **5f** in  $\text{CDCl}_3$

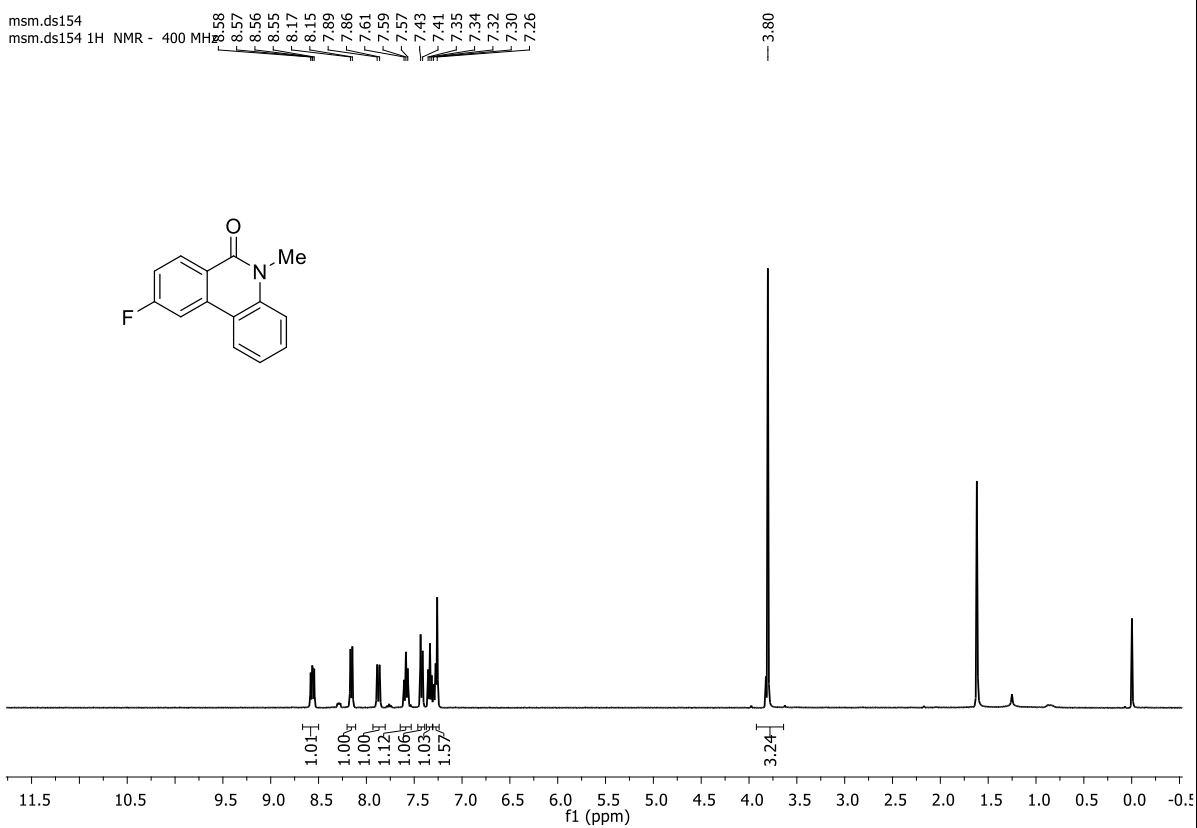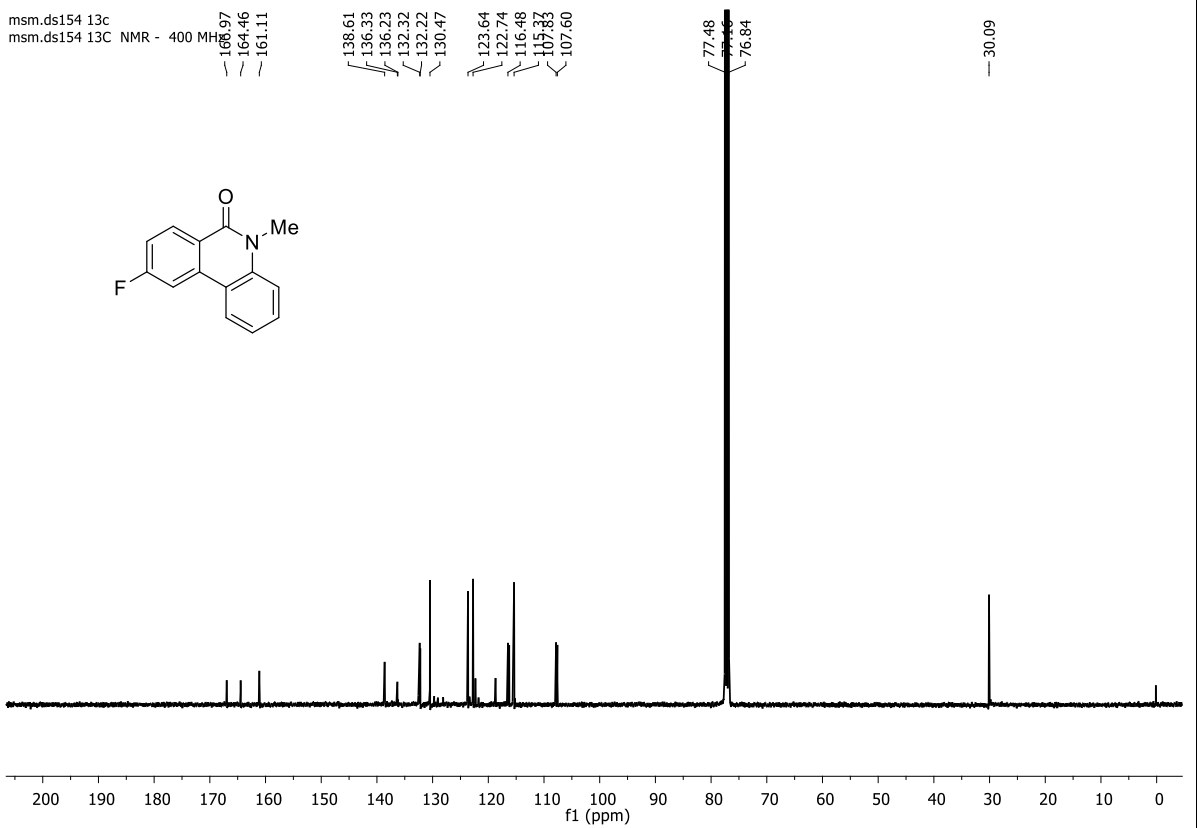

$^{19}\text{F}$  NMR (471 MHz) of **5f** in  $\text{CDCl}_3$

19F  
msm / sk / 943 (f) - 19f - F19

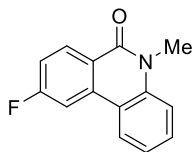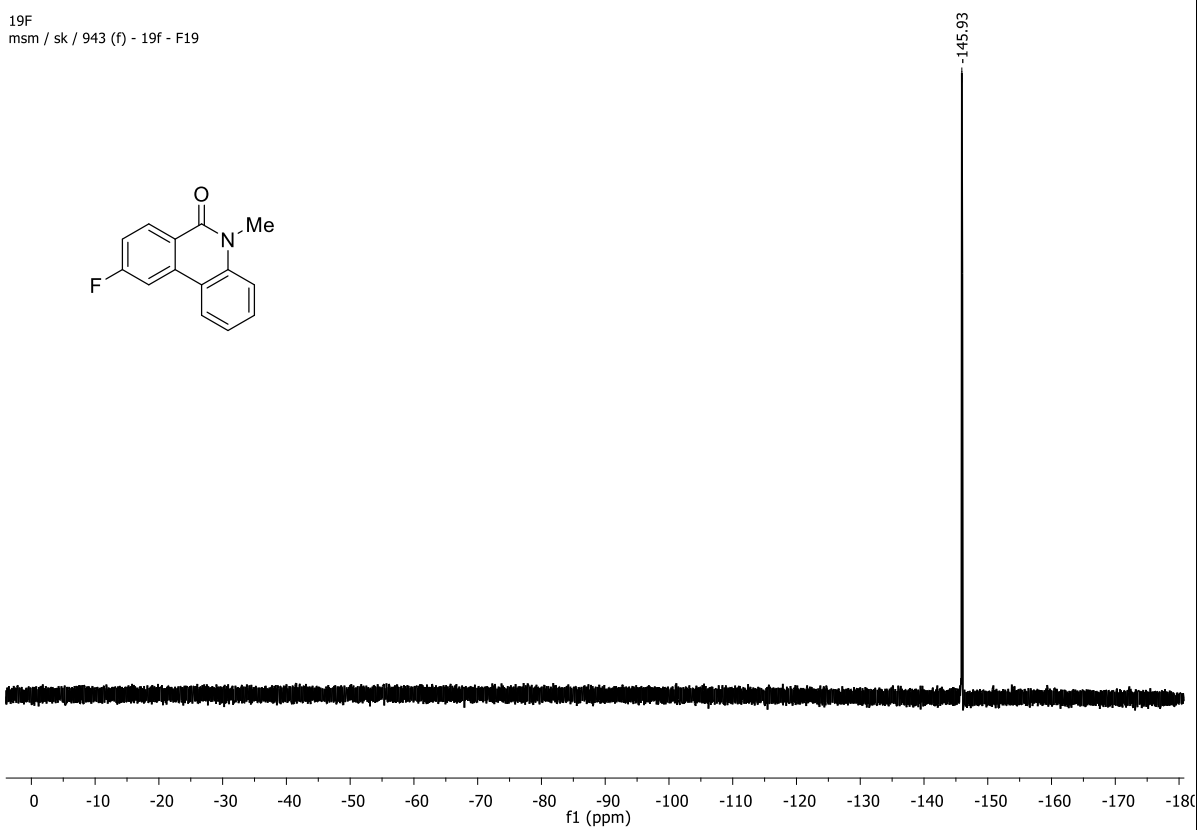

<sup>1</sup>H (400 MHz) and <sup>13</sup>C (101 MHz) NMR of **5g** in CDCl<sub>3</sub>

1H  
msm.ds229-1h400Mhz

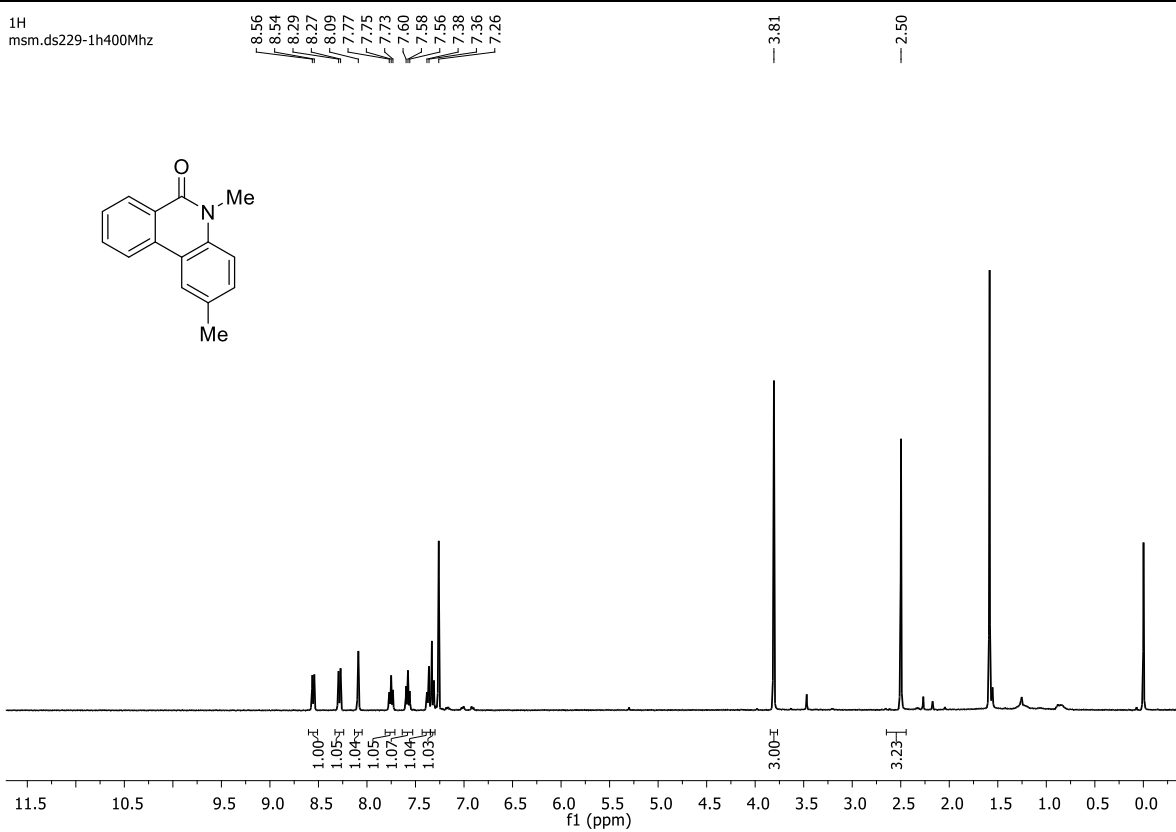

msm.ds229(c)  
msm.ds229(c)-13c -400Mhz

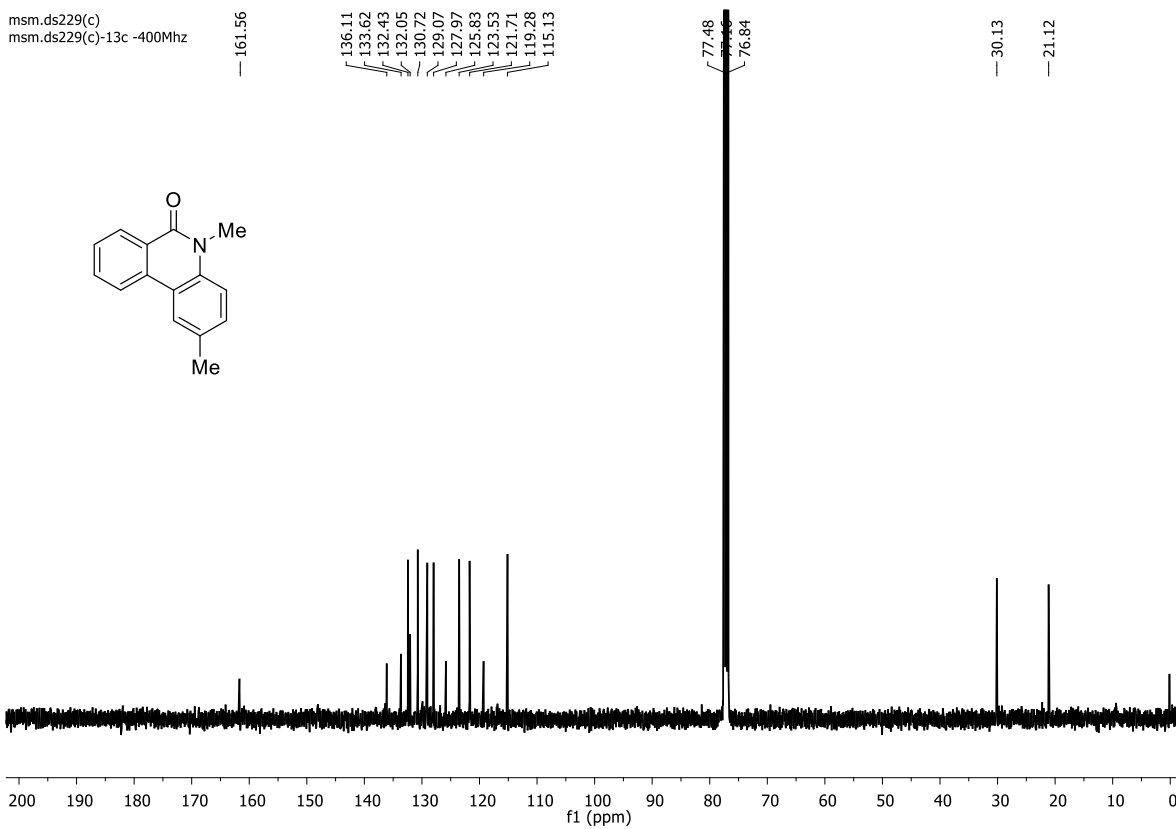

<sup>1</sup>H (400 MHz) and <sup>13</sup>C (126 MHz) NMR of **5h** in CDCl<sub>3</sub>

msm.ds290  
msm / ds / 290

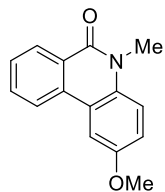

8.57  
8.55  
8.23  
8.21  
7.77  
7.74  
7.61  
7.59  
7.58  
7.36  
7.35  
7.26  
7.16  
7.14  
7.14

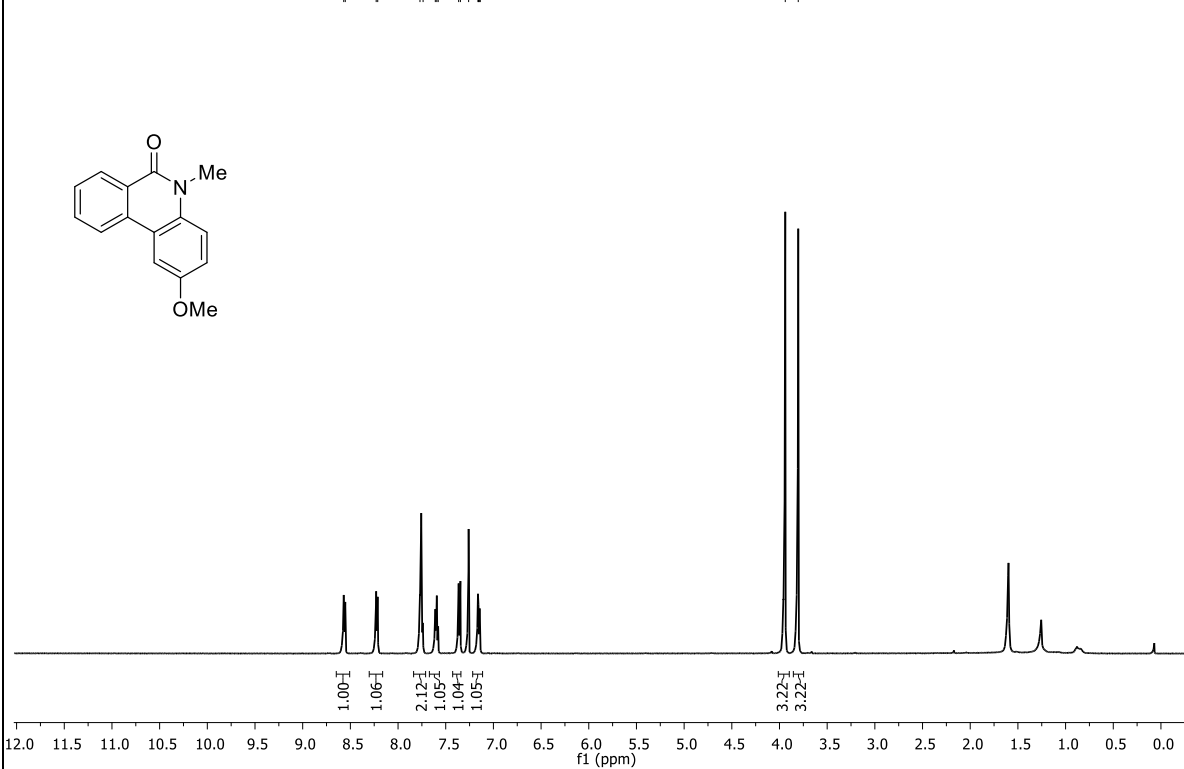

msm.ds290r  
msm / ds / 290 (r) - 13c - 500m

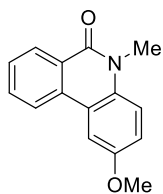

161.35  
155.29

133.37  
132.59  
132.40  
129.20  
128.25  
126.09  
121.81  
120.40  
116.66  
116.35  
107.34

77.41  
77.06  
76.91

55.92

30.22

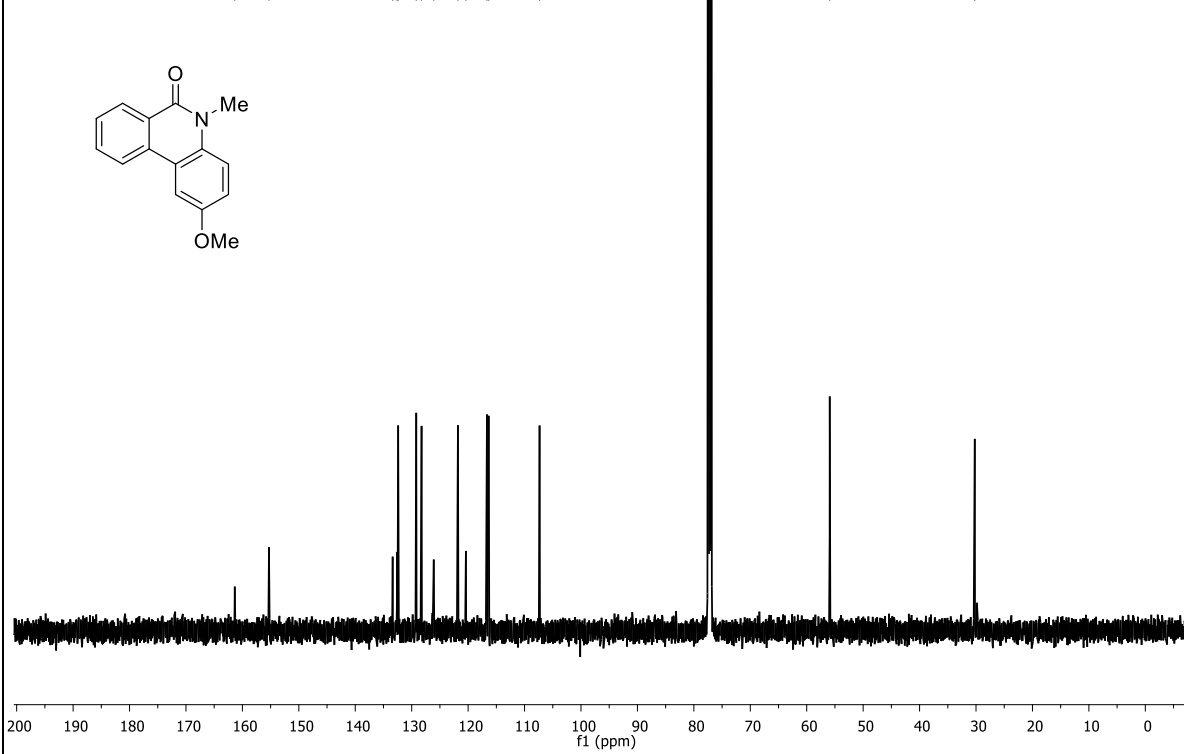

<sup>1</sup>H (400 MHz) and <sup>13</sup>C (101 MHz) NMR of **5i** in CDCl<sub>3</sub>

<sup>1</sup>H  
msm.ds284f -1h -400mhz

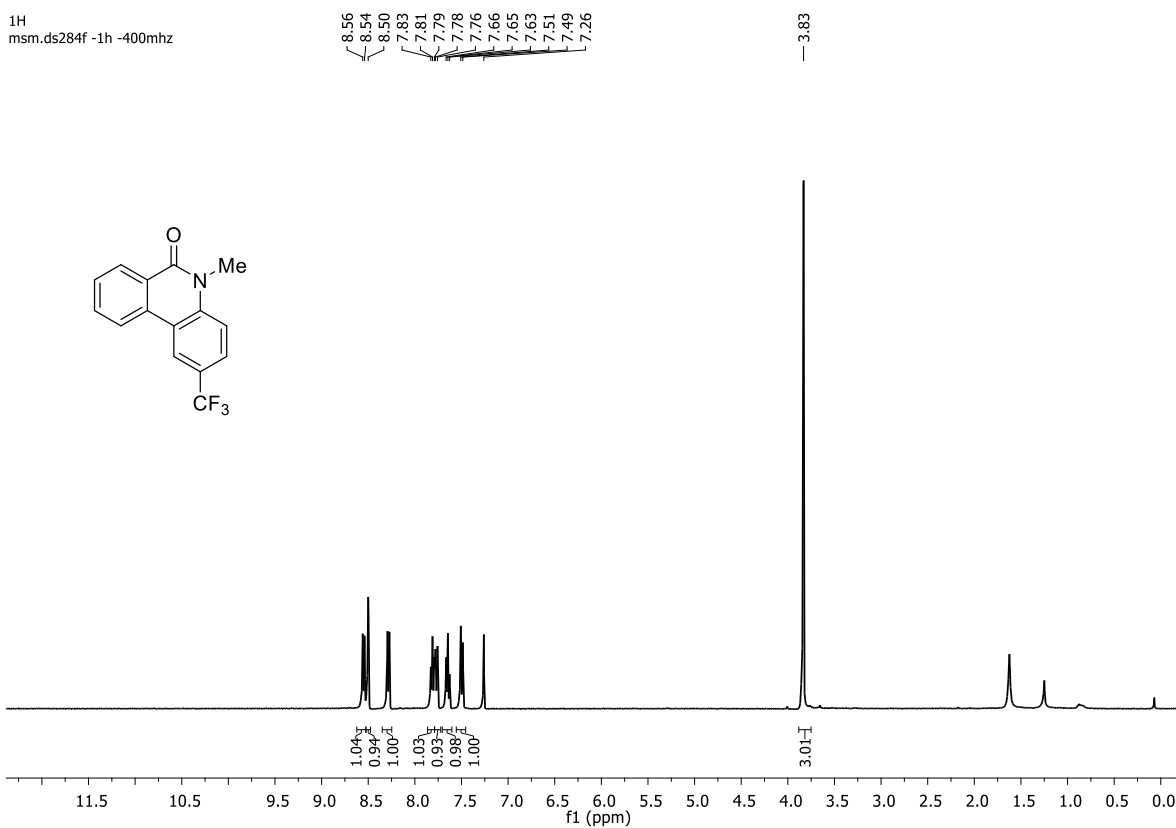

<sup>13</sup>C  
msm.ds284f13c  
msm.ds284f -13c-400mhz

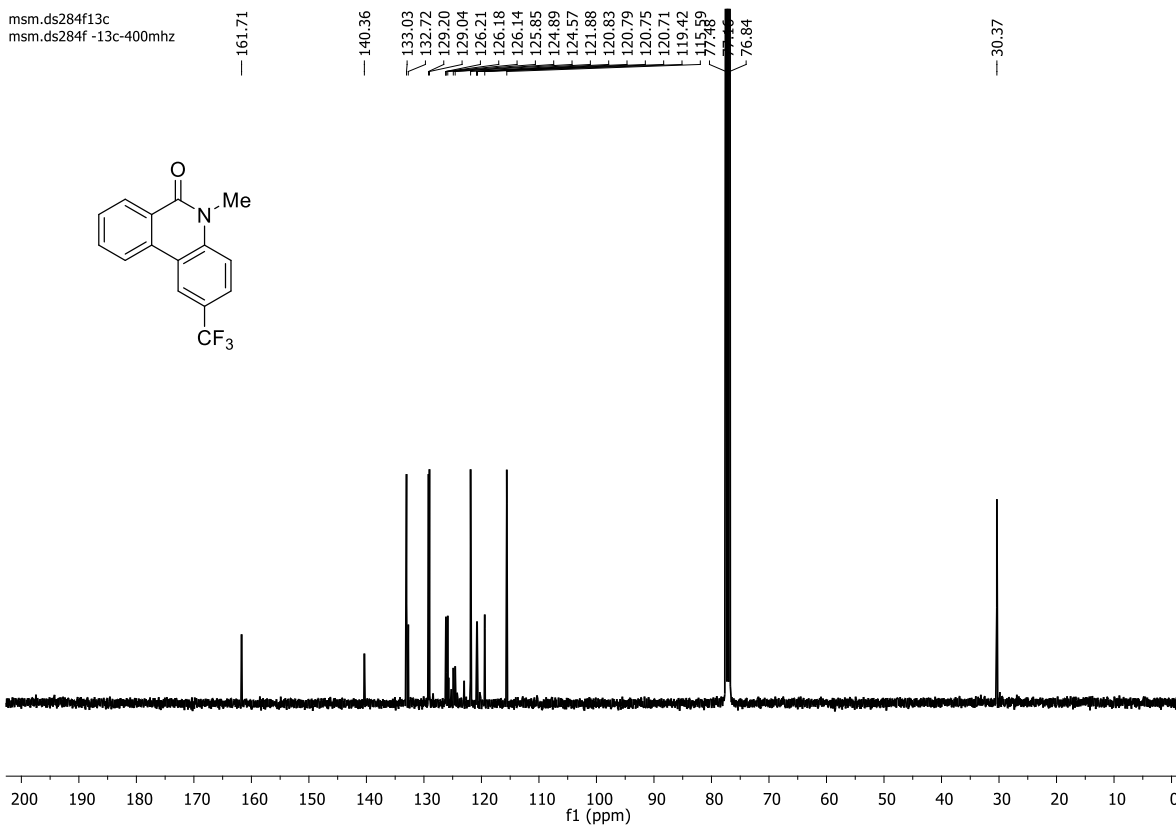



<sup>19</sup>F (471 MHz) NMR of **5i** in CDCl<sub>3</sub>

mzm.ds284r  
mzm / ds / 284 (r) - 19f - 500mhz

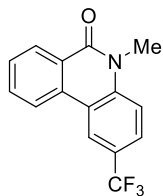

---61.72

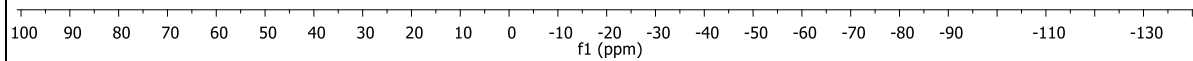

$^1\text{H}$  (500 MHz) and  $^{13}\text{C}$  (126 MHz) NMR of **5'a** in  $\text{CDCl}_3$

msm.ds1721  
msm / ds / 172 (l) - 1h - 500mhz

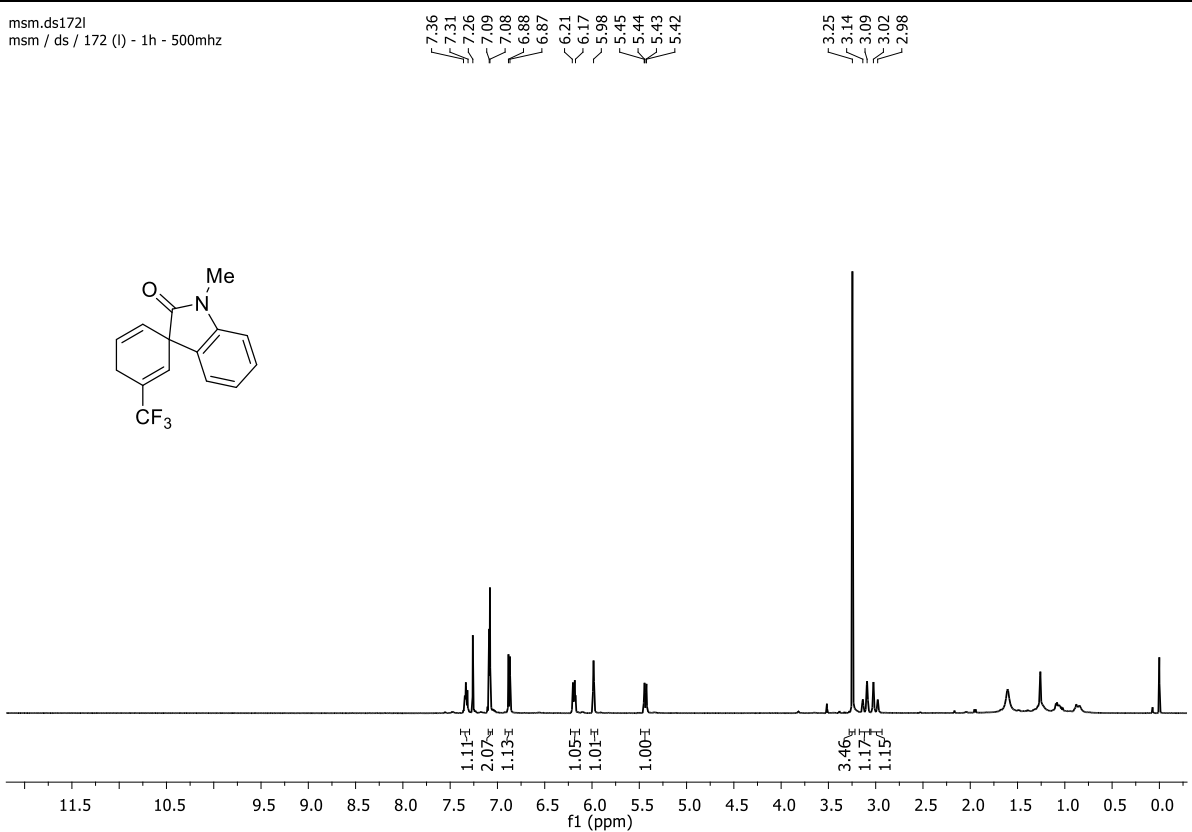

msm.ds1721  
msm / ds / 172 (l) - 1h - 500mhz

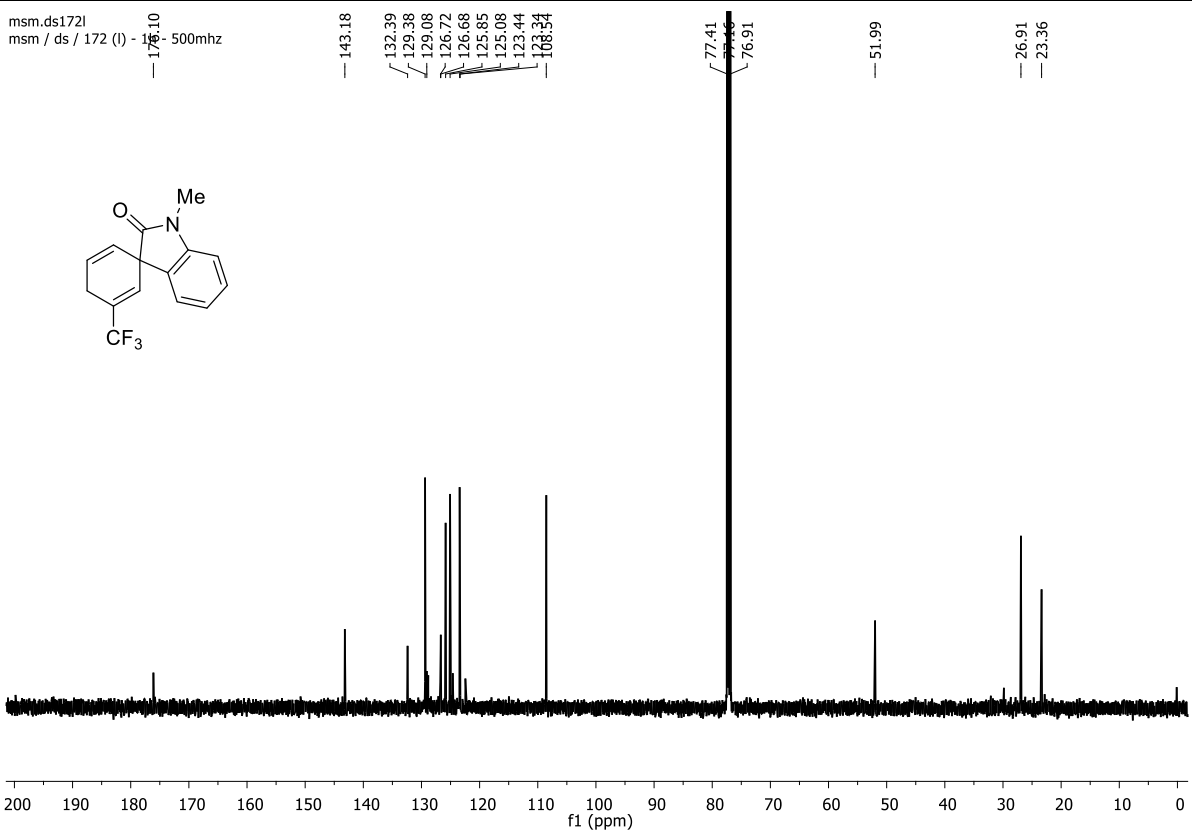

$^{19}\text{F}$  (471 MHz) NMR of **5'a** in  $\text{CDCl}_3$

mzm.ds1721  
mzm / ds / 172 (l) - 19f - 500mhz

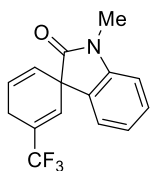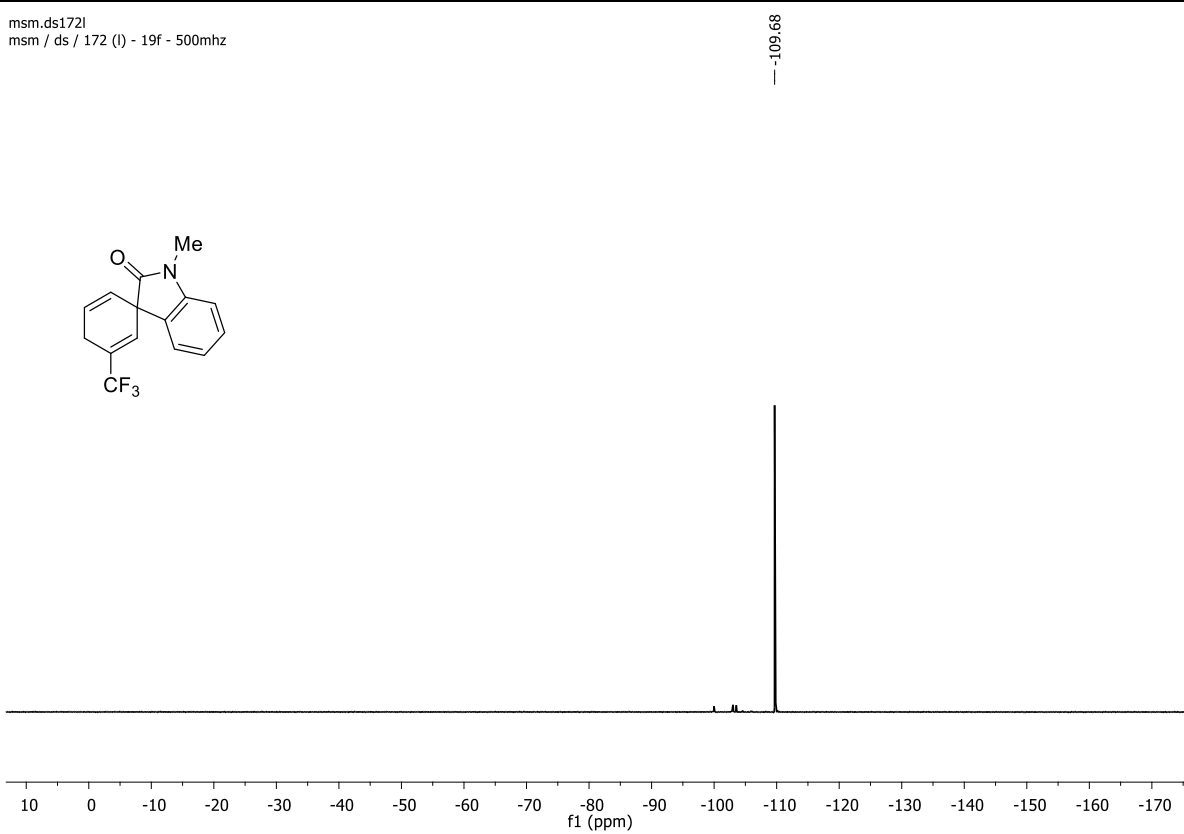

$^1\text{H}$  (500 MHz) and  $^{13}\text{C}$  (126 MHz) NMR of **5'b** in  $\text{CDCl}_3$

msm.ds136f  
msm / ds / 136 (r) - 1h - 500mhz

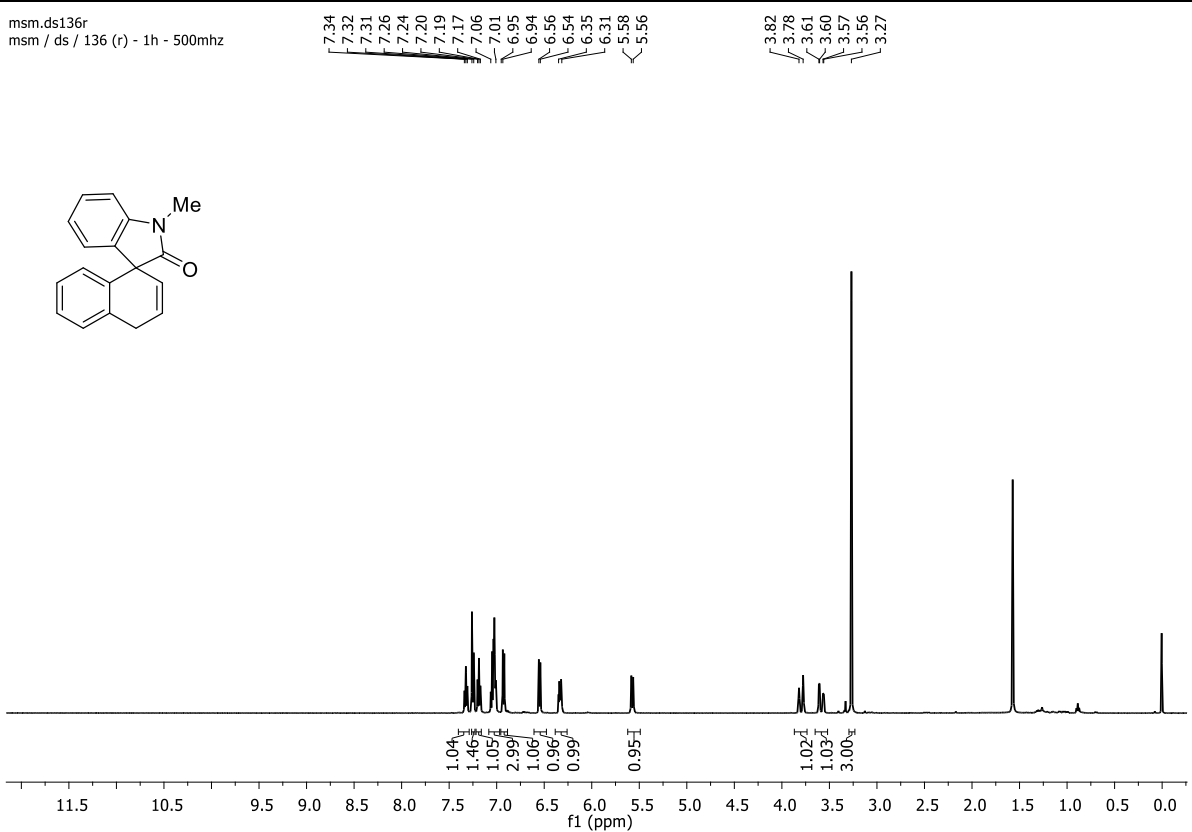

msm.ds136c  
msm / ds / 136 (c) - 500mhz

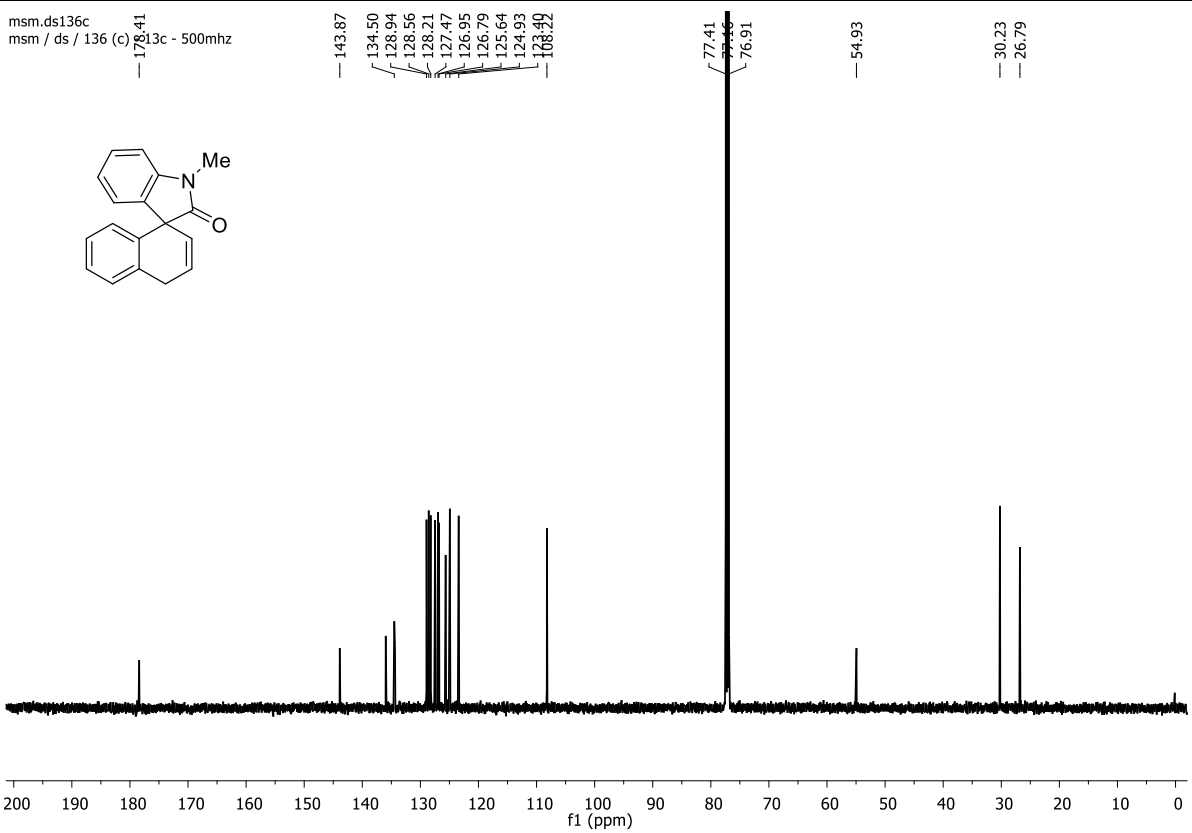

<sup>1</sup>H (400 MHz) NMR of **7a** in CDCl<sub>3</sub>

mzm.ds150  
mzm.ds150 NMR - 400 MHz

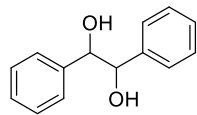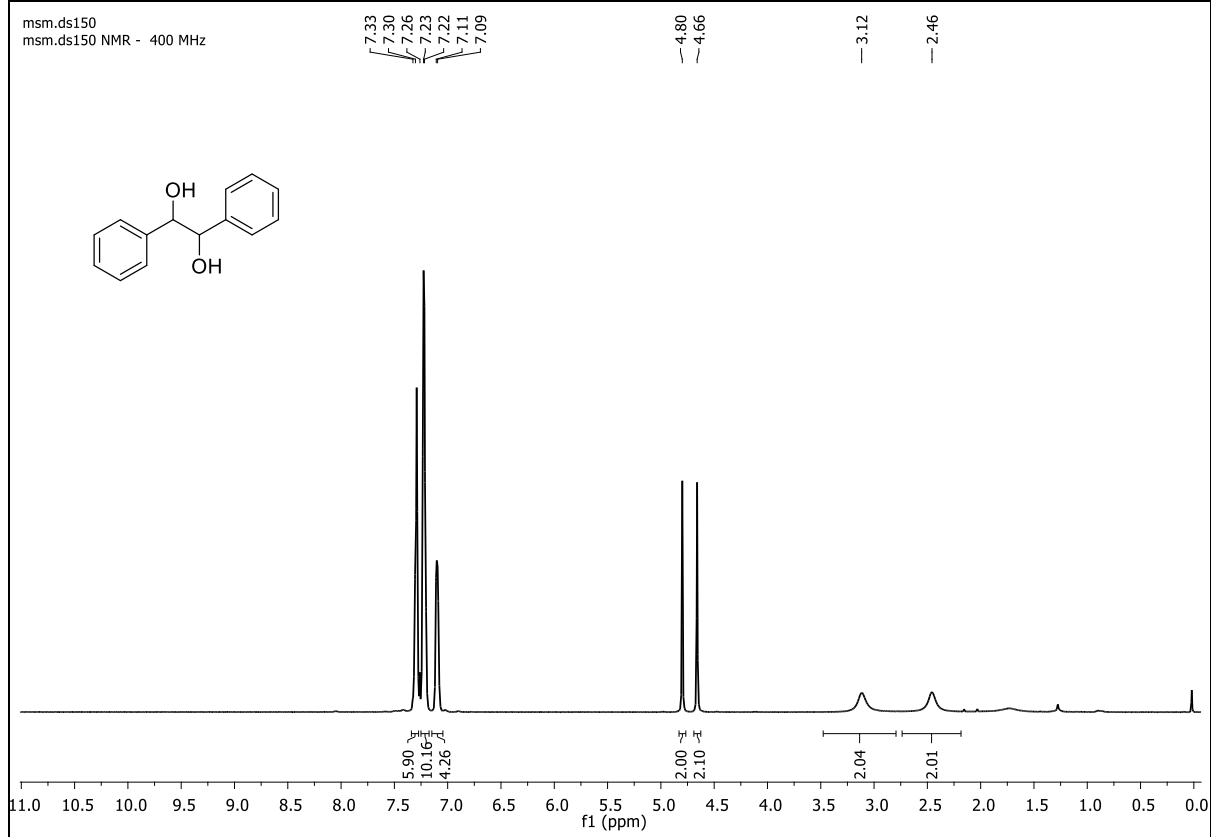

<sup>1</sup>H (400 MHz) NMR of **7b** in CDCl<sub>3</sub>

msm.ds220

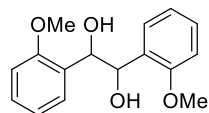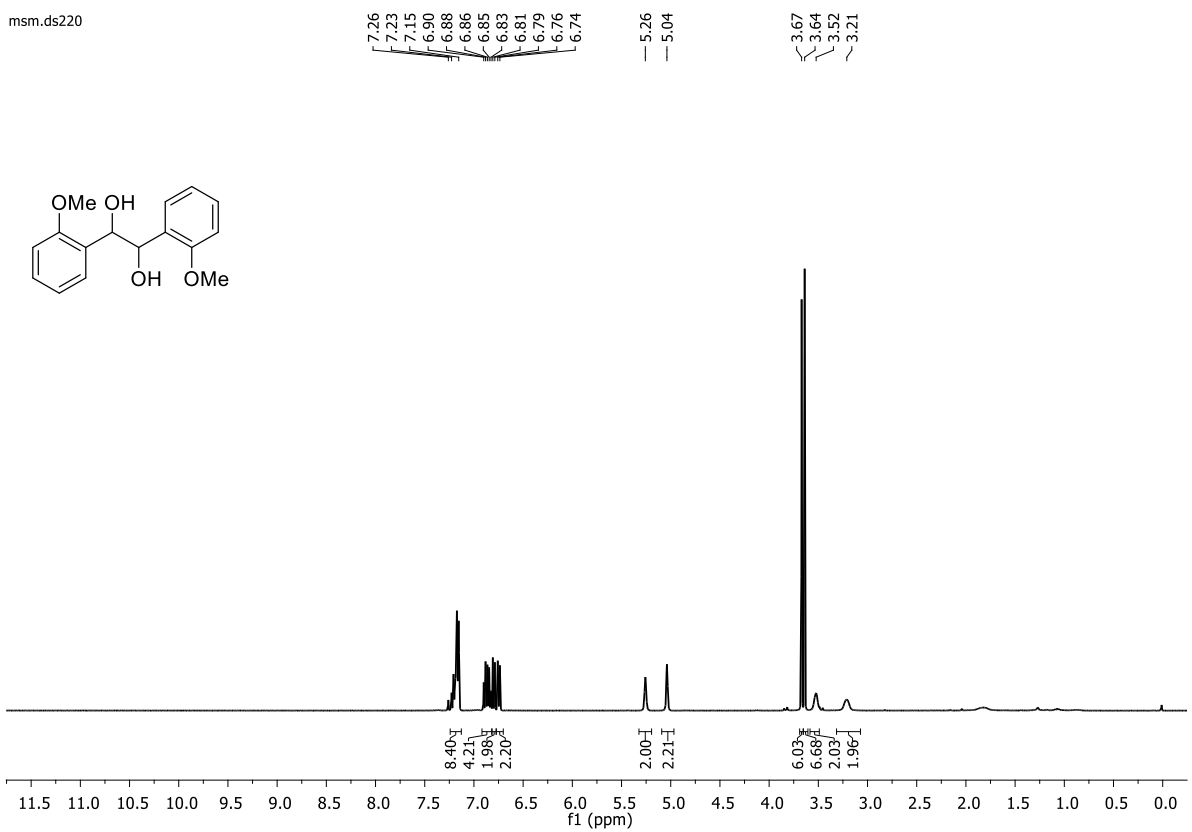

<sup>1</sup>H (400 MHz) NMR of **7c** in CDCl<sub>3</sub>

msm. ds 157(C) 1H  
msm. ds 157(C) 1H

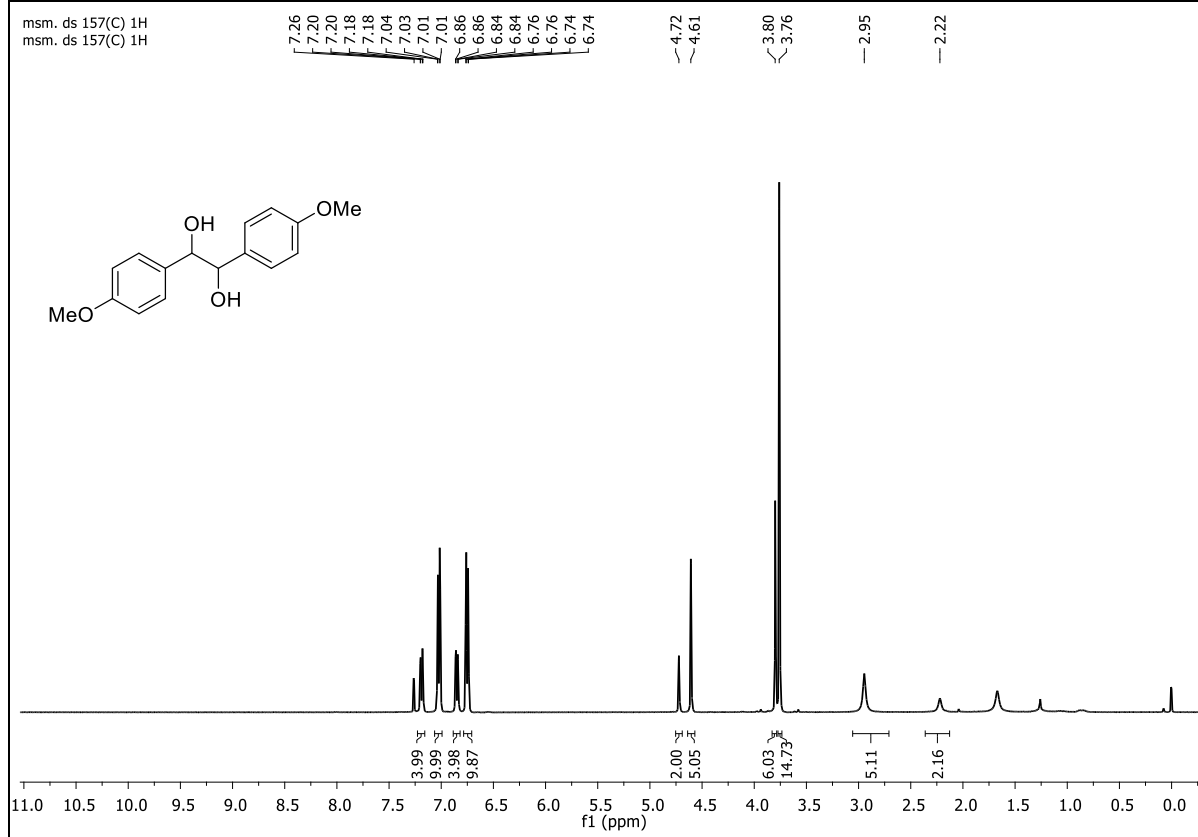

<sup>1</sup>H (400 MHz) and <sup>13</sup>C (126 MHz) NMR of **7d** in CDCl<sub>3</sub>

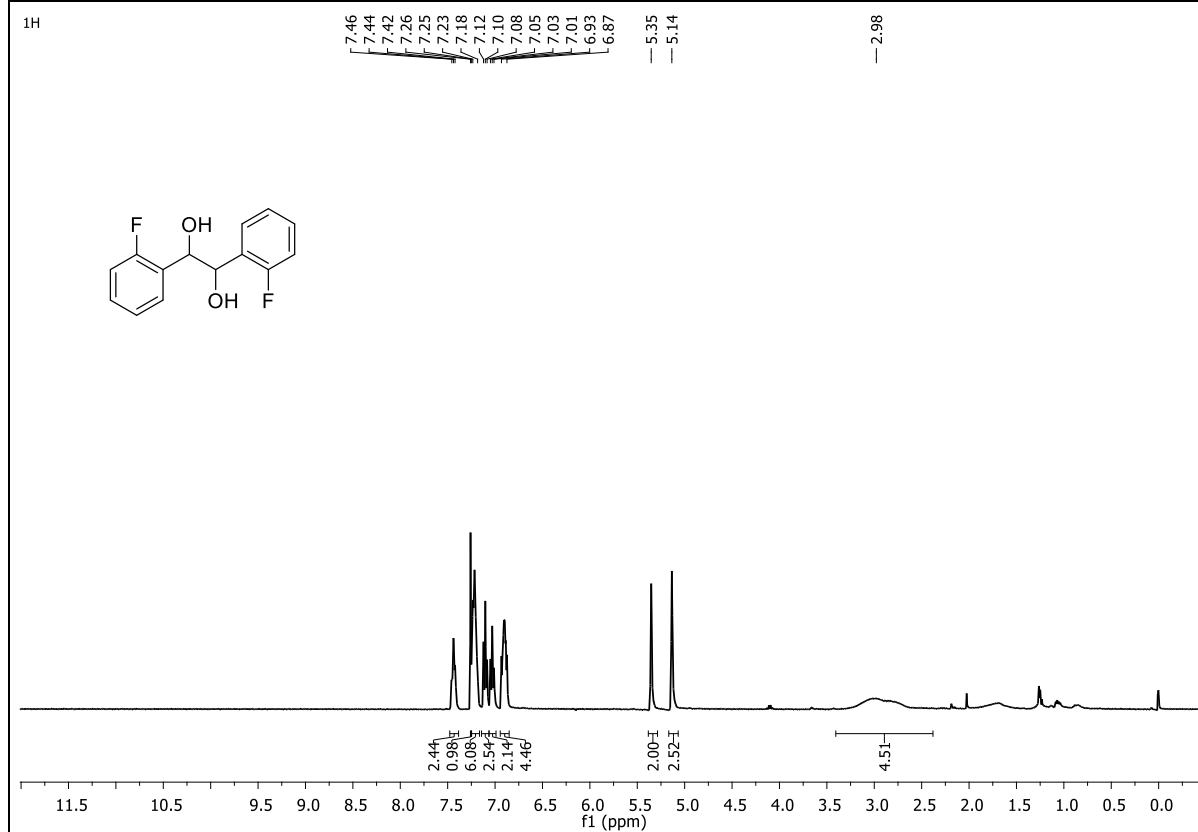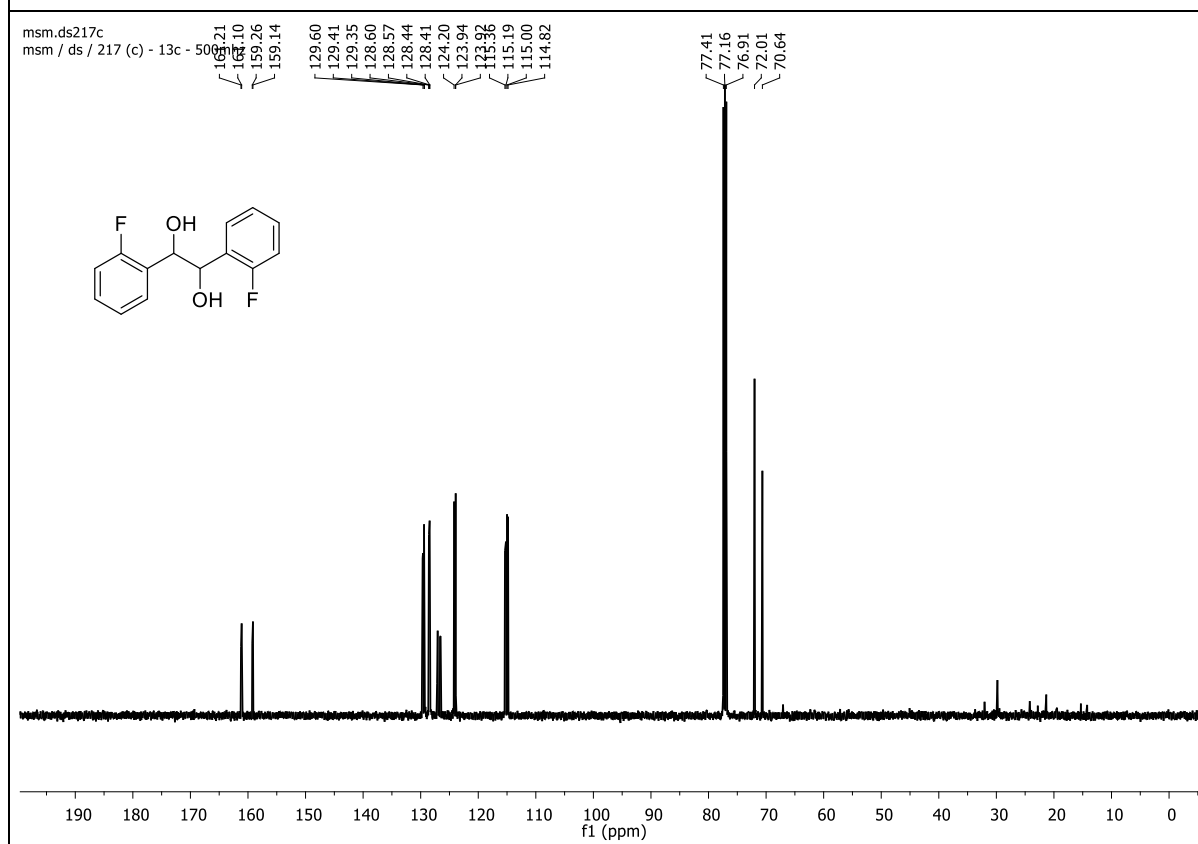



$^{19}\text{F}$  (471 MHz) NMR of **7d** in  $\text{CDCl}_3$

mzm.ds217f  
mzm / ds / 217 (f) - 19f - 500mhz

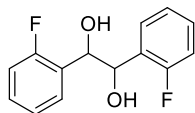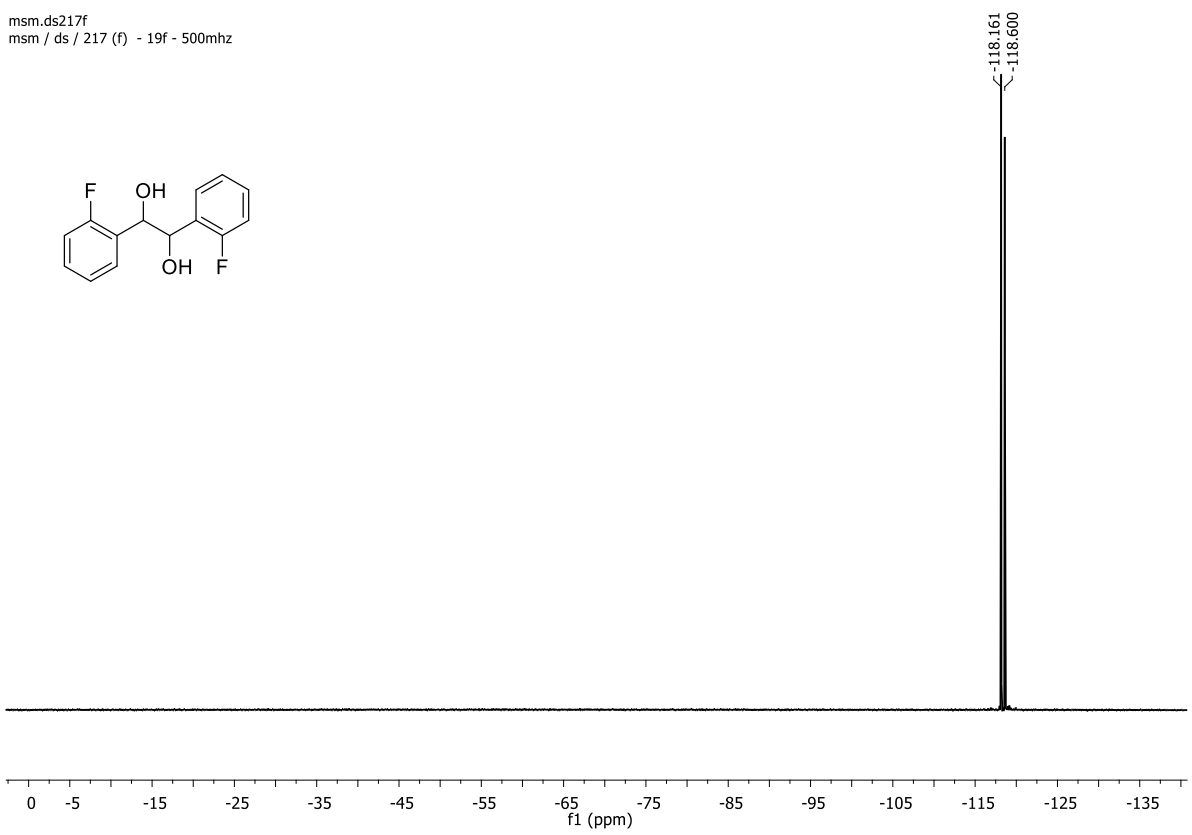

<sup>1</sup>H (500 MHz) NMR of **7e** in CDCl<sub>3</sub>

msm.ds147r  
msm / ds / 147 (r) - 1h - 500mhz

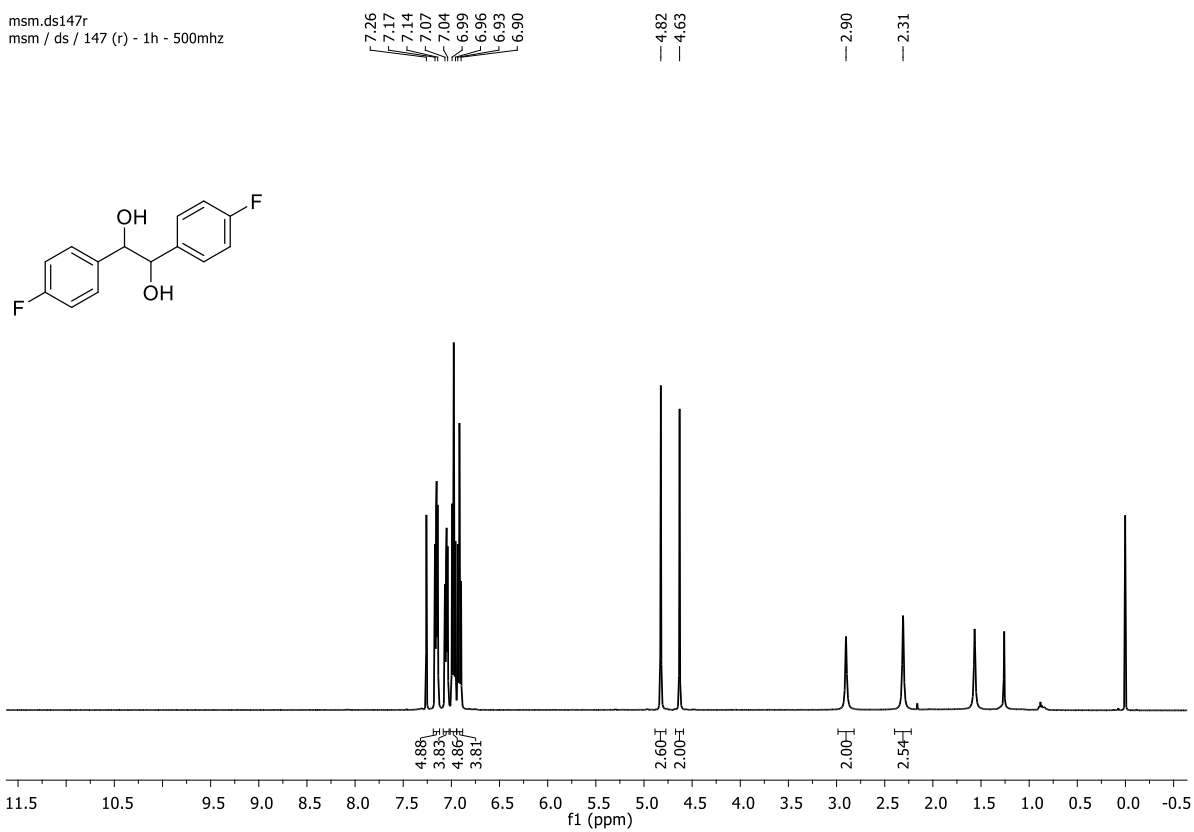

<sup>1</sup>H (400 MHz) NMR of **7f** in DMSO-*d*<sub>6</sub>

msm.ds147r  
msm / ds / 147 (r) - 1h - 500mhz

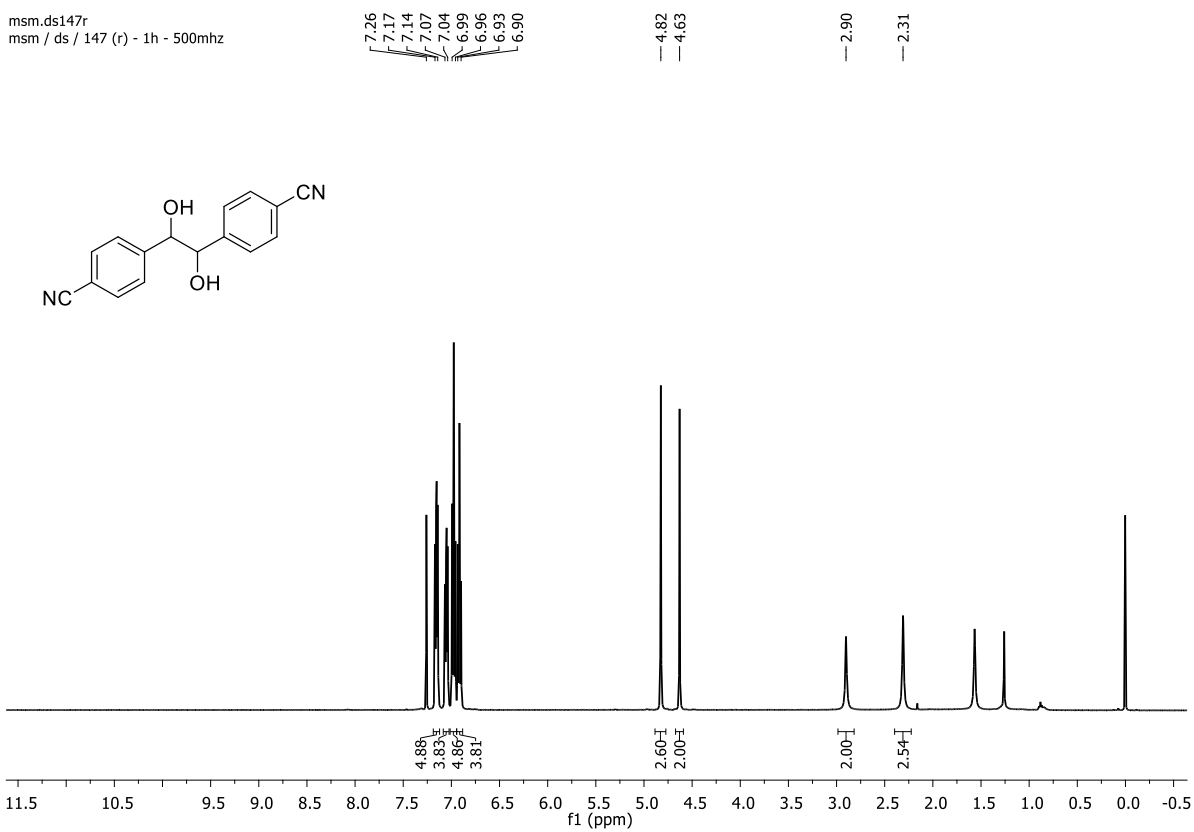

<sup>1</sup>H (400 MHz) NMR of **7g** in CDCl<sub>3</sub>

msm.ds84r  
msm.ds94r -1h -400mhz

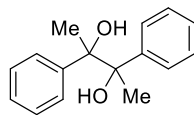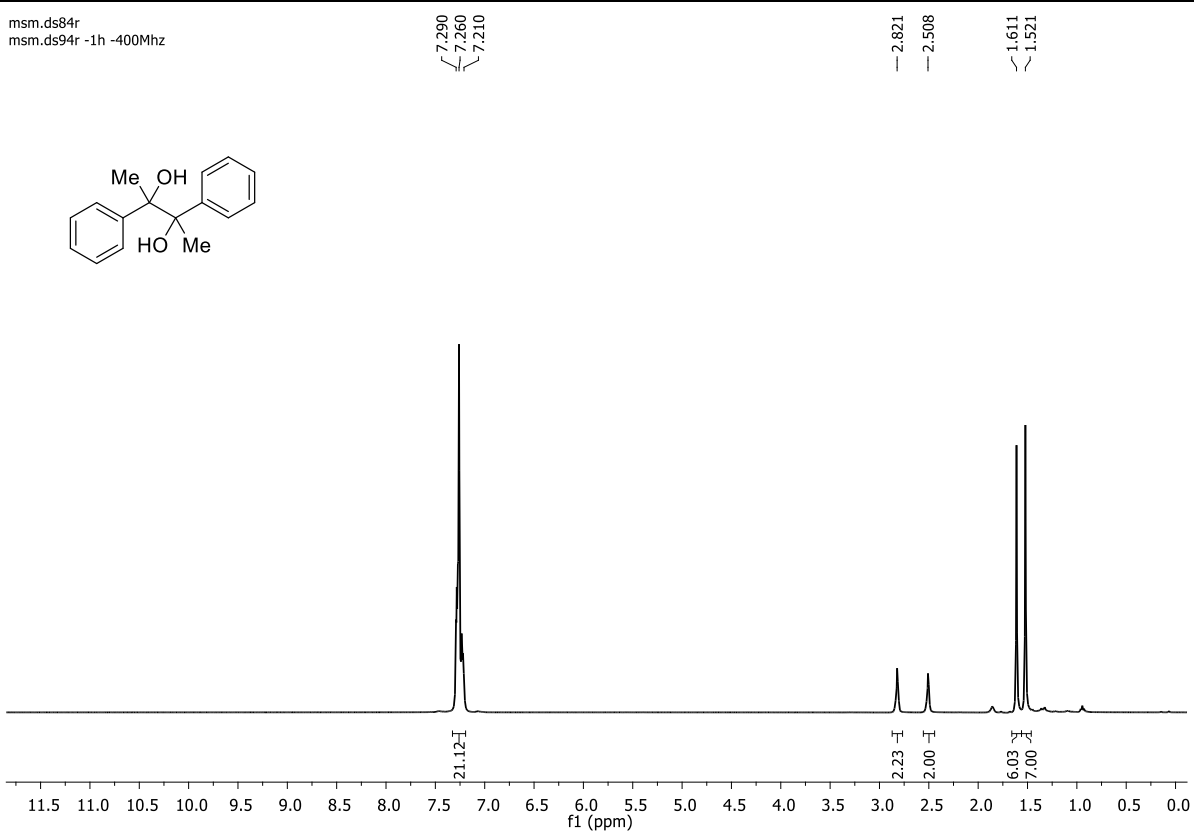

<sup>1</sup>H (400 MHz) NMR of **7h** in CDCl<sub>3</sub>

msm.ds95r

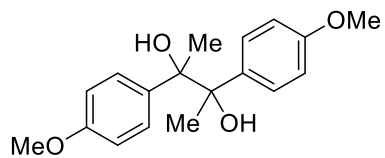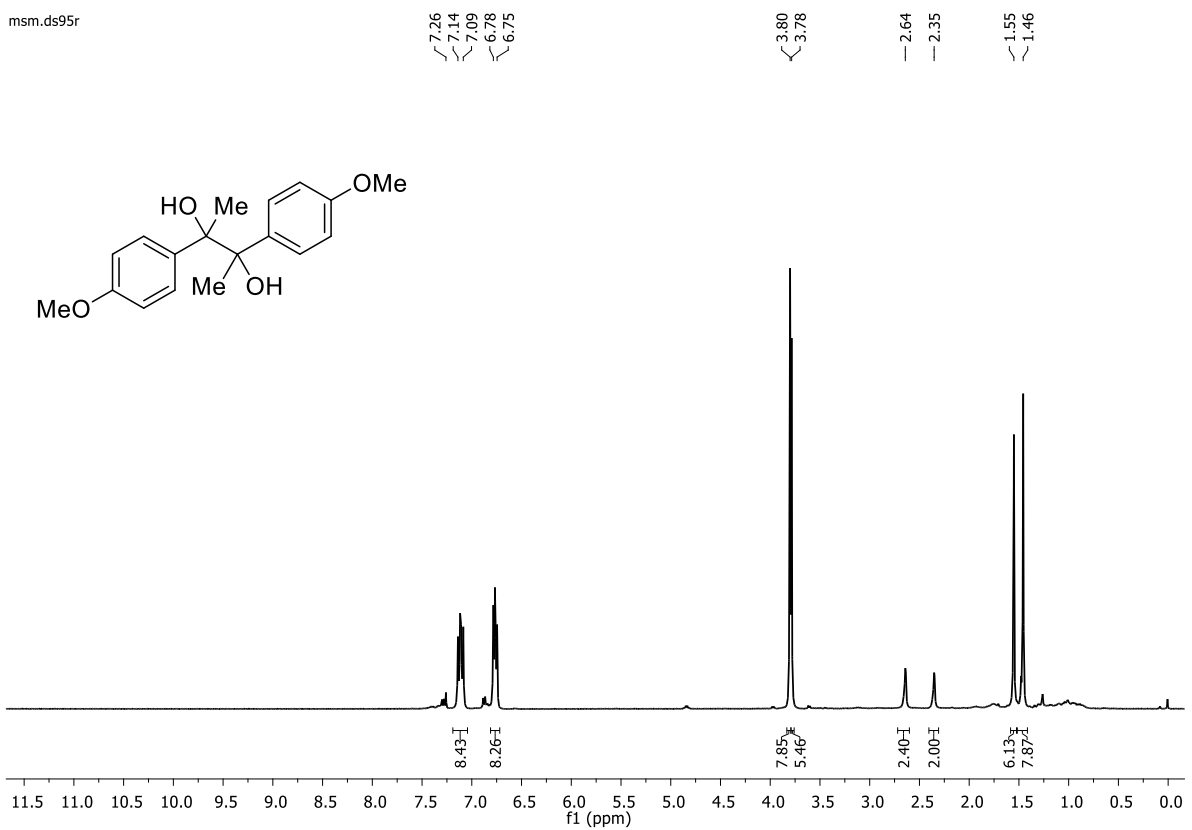

<sup>1</sup>H (500 MHz) NMR of **7i** in CDCl<sub>3</sub>

msm.ds81  
msm / ds / 81 - 1h - 500mhz

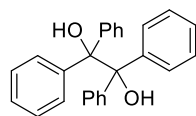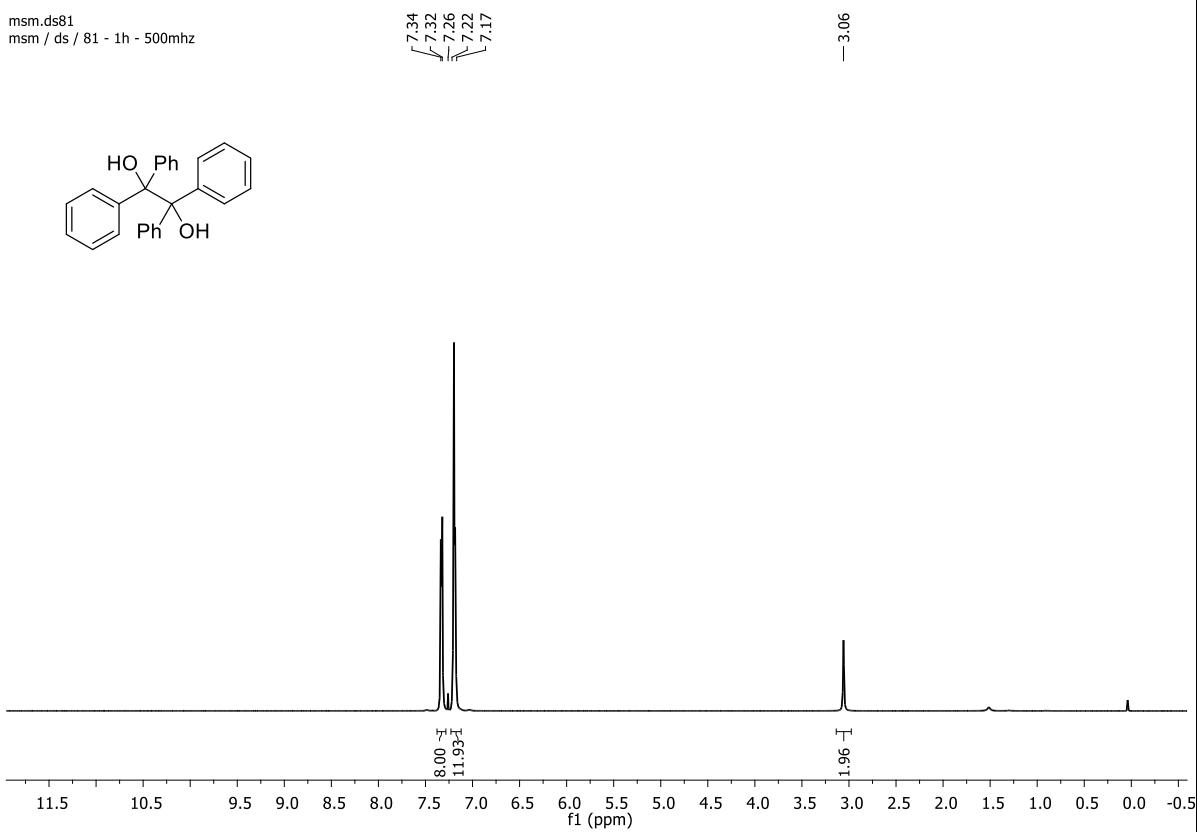

<sup>1</sup>H (400 MHz) NMR of **9a** in CDCl<sub>3</sub>

msm.ds98r

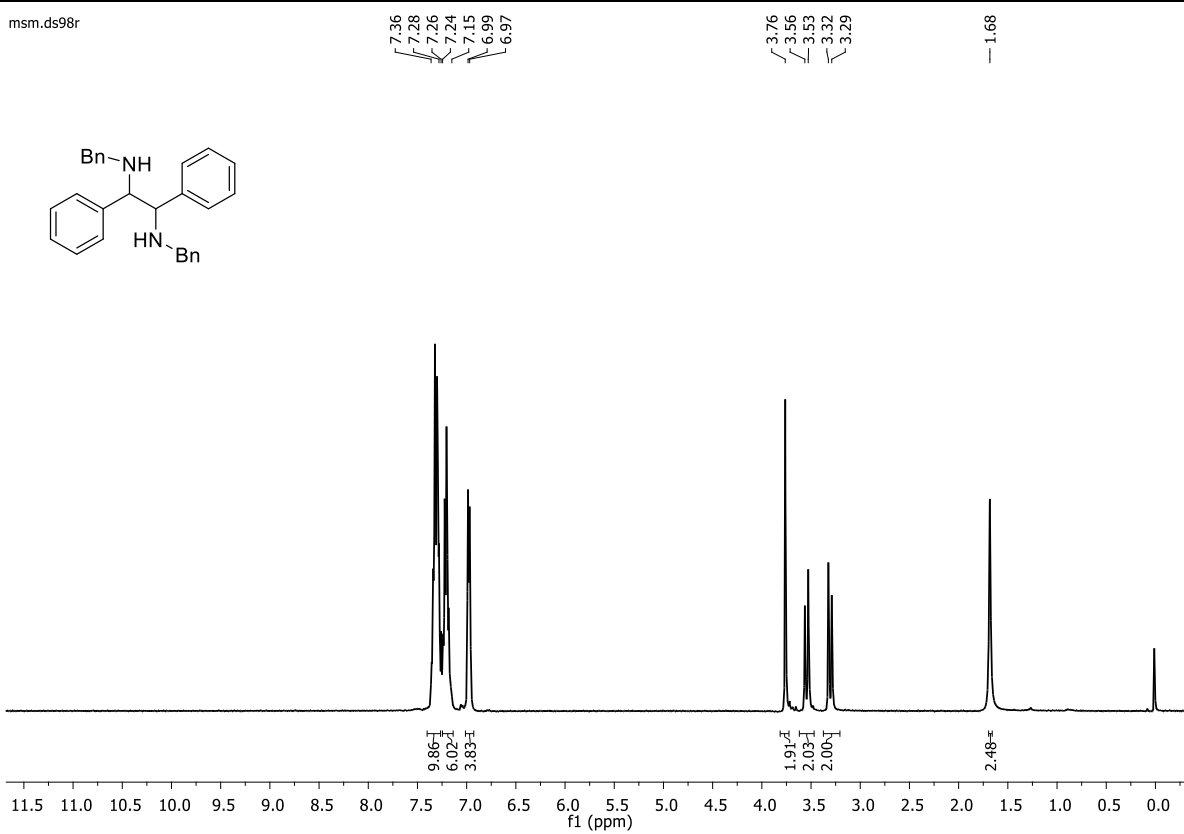

<sup>1</sup>H (400 MHz) NMR of **9b** in CDCl<sub>3</sub>

msm.ds98r

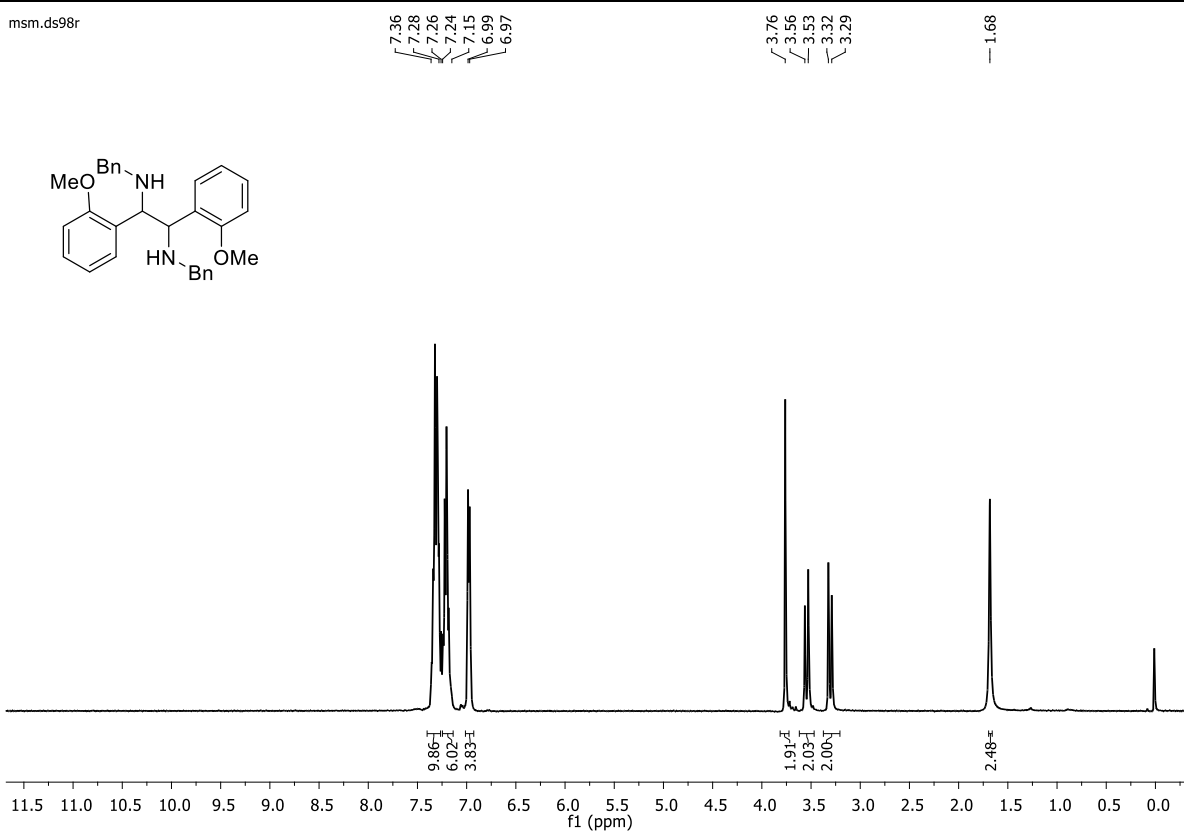



<sup>1</sup>H (500 MHz) NMR of **9c** in CDCl<sub>3</sub>

msm.ds149  
msm / ds / 149 - 1h - 500mhz

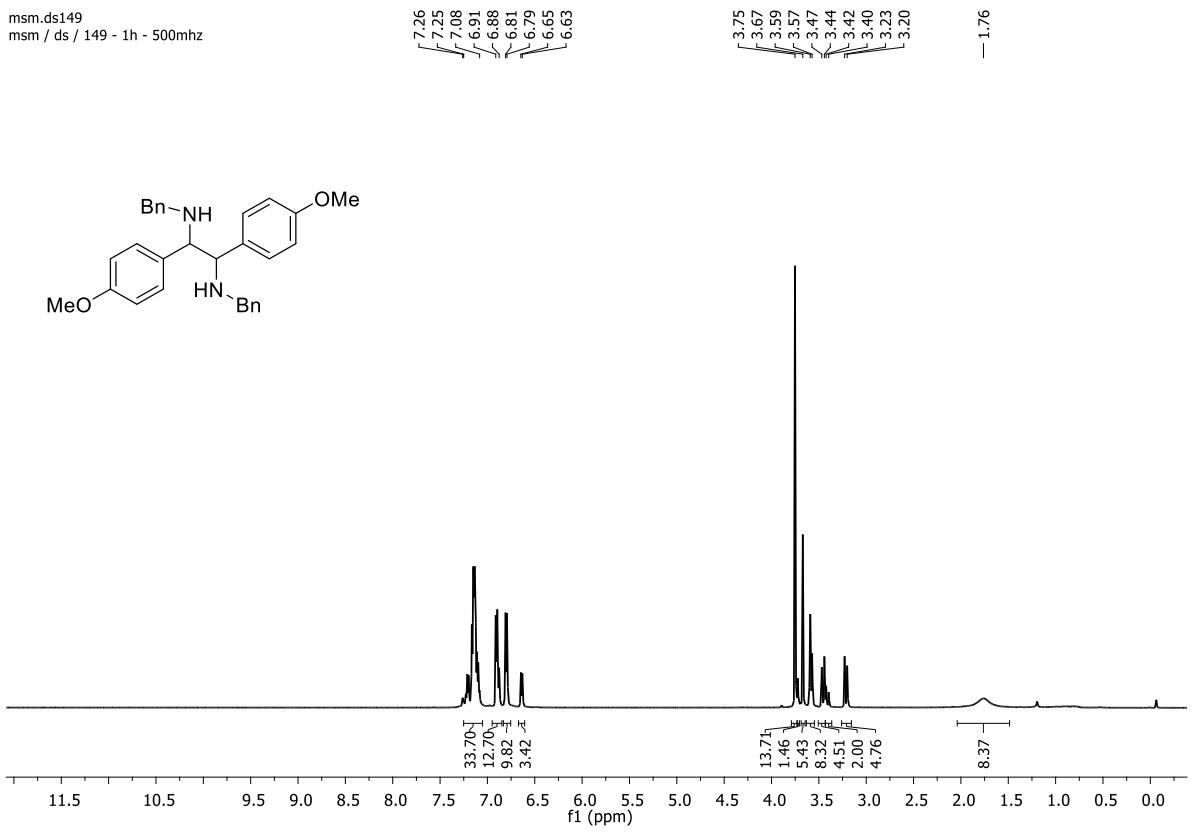

<sup>1</sup>H (400 MHz) NMR of **9d** in CDCl<sub>3</sub>

msm.ds83

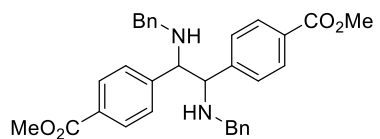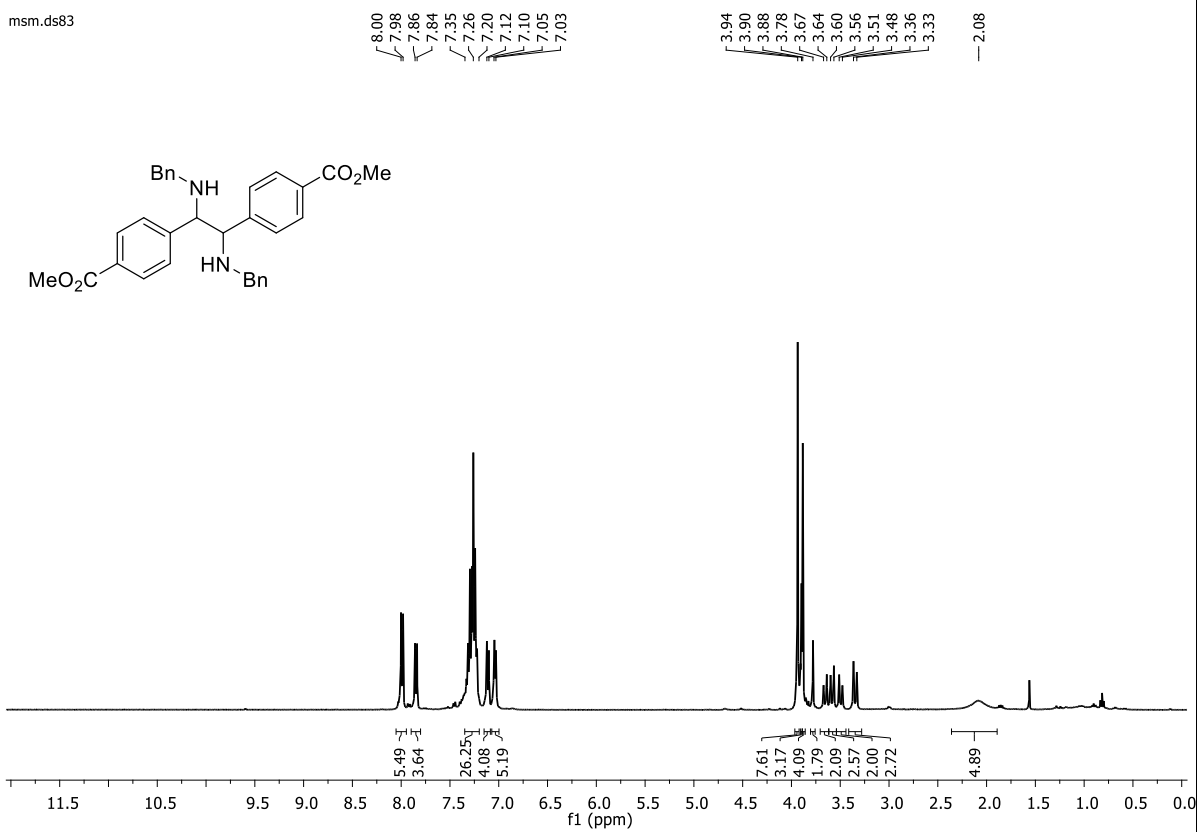

<sup>1</sup>H (400 MHz) NMR of **9e** in CDCl<sub>3</sub>

msm.ds148r  
msm.ds148r -1h NMR 400 MHz

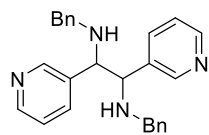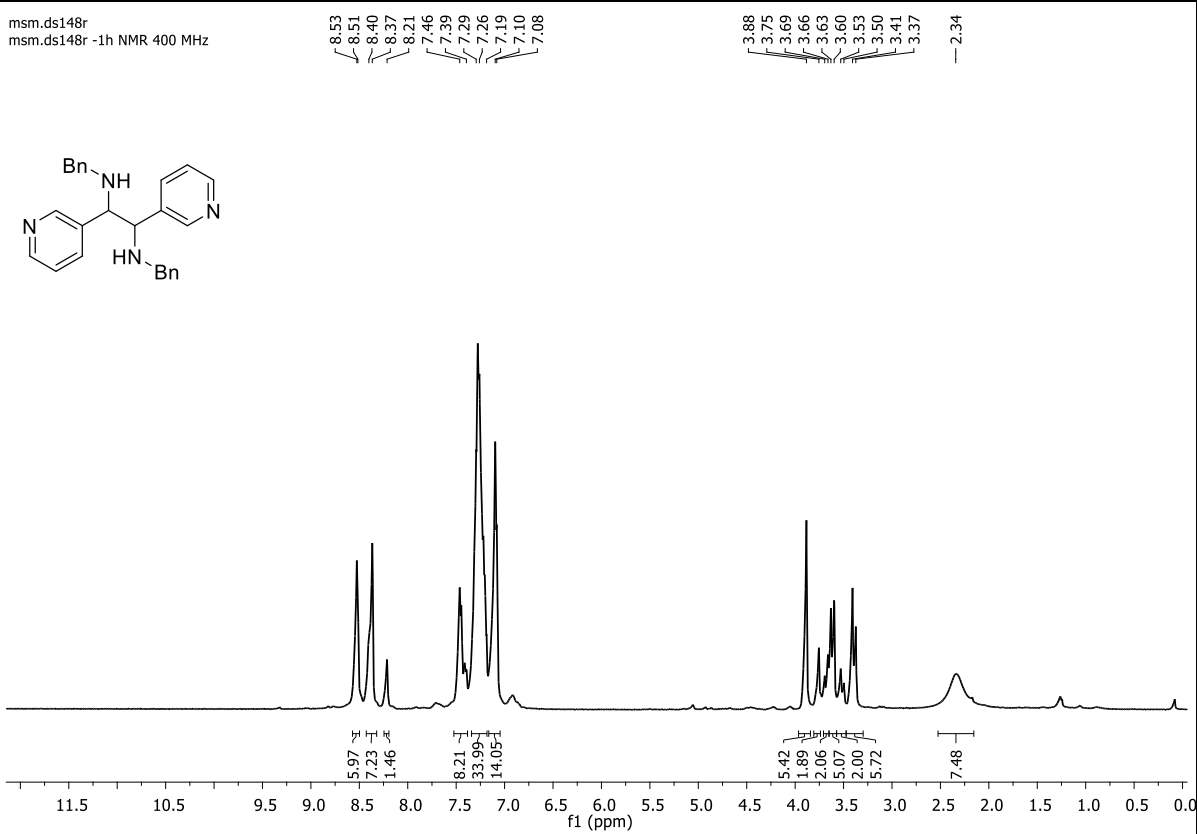

<sup>1</sup>H (400 MHz) NMR of **9f** in CDCl<sub>3</sub>

msm.ds152  
msm.ds152 -1h NMR - 400 MHz

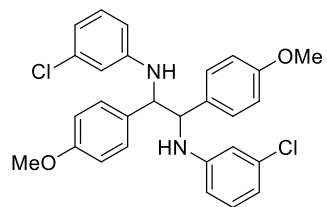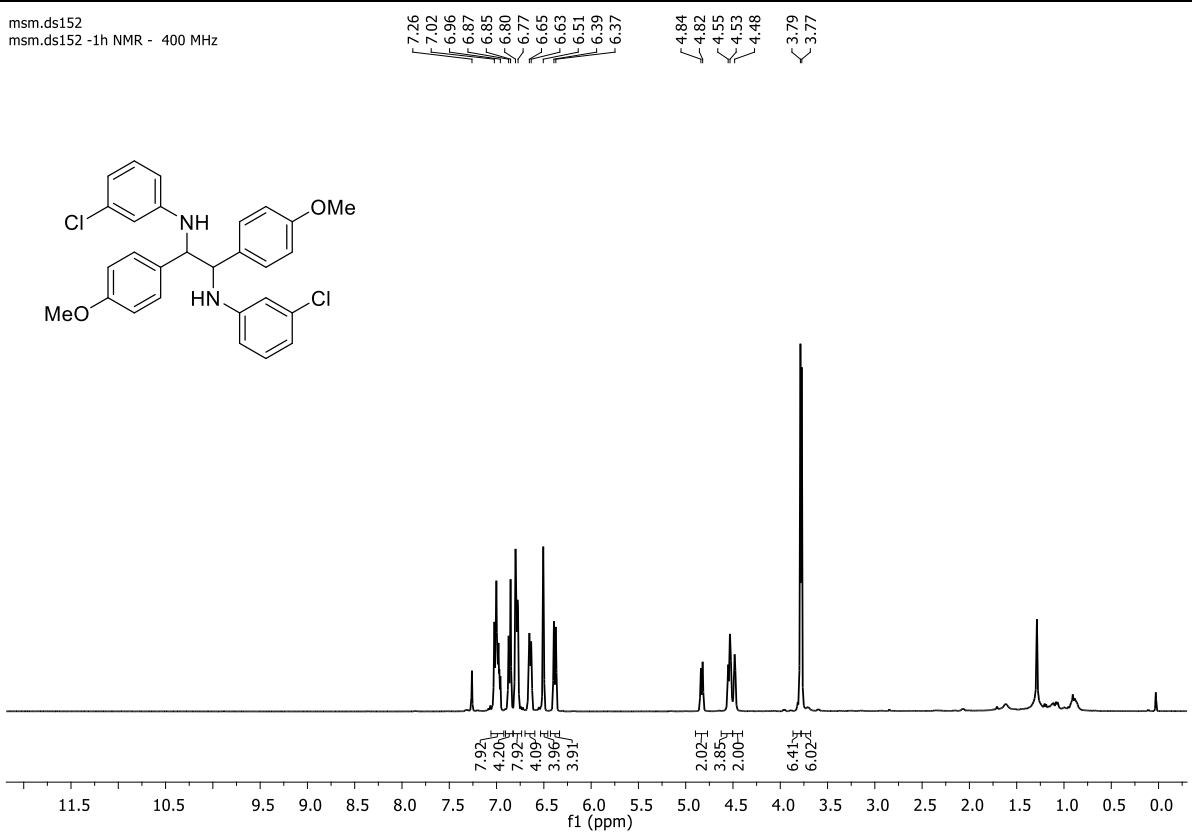

<sup>1</sup>H (400 MHz) NMR of **12a** in CDCl<sub>3</sub>

indole  
msm.ds314a -1h - 400 MHz

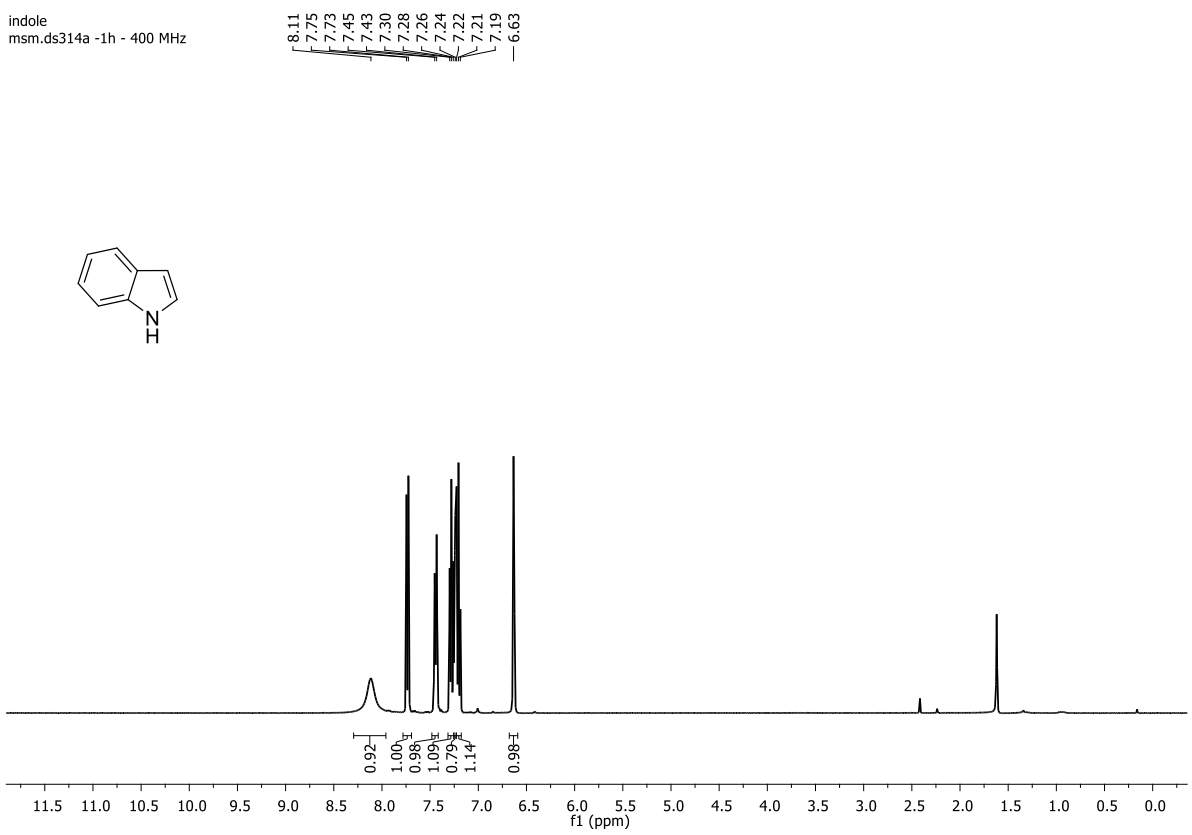

<sup>1</sup>H (500 MHz) NMR of **12b** in CDCl<sub>3</sub>

msm.ds120c  
msm.ds120c-1h-500mhz

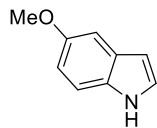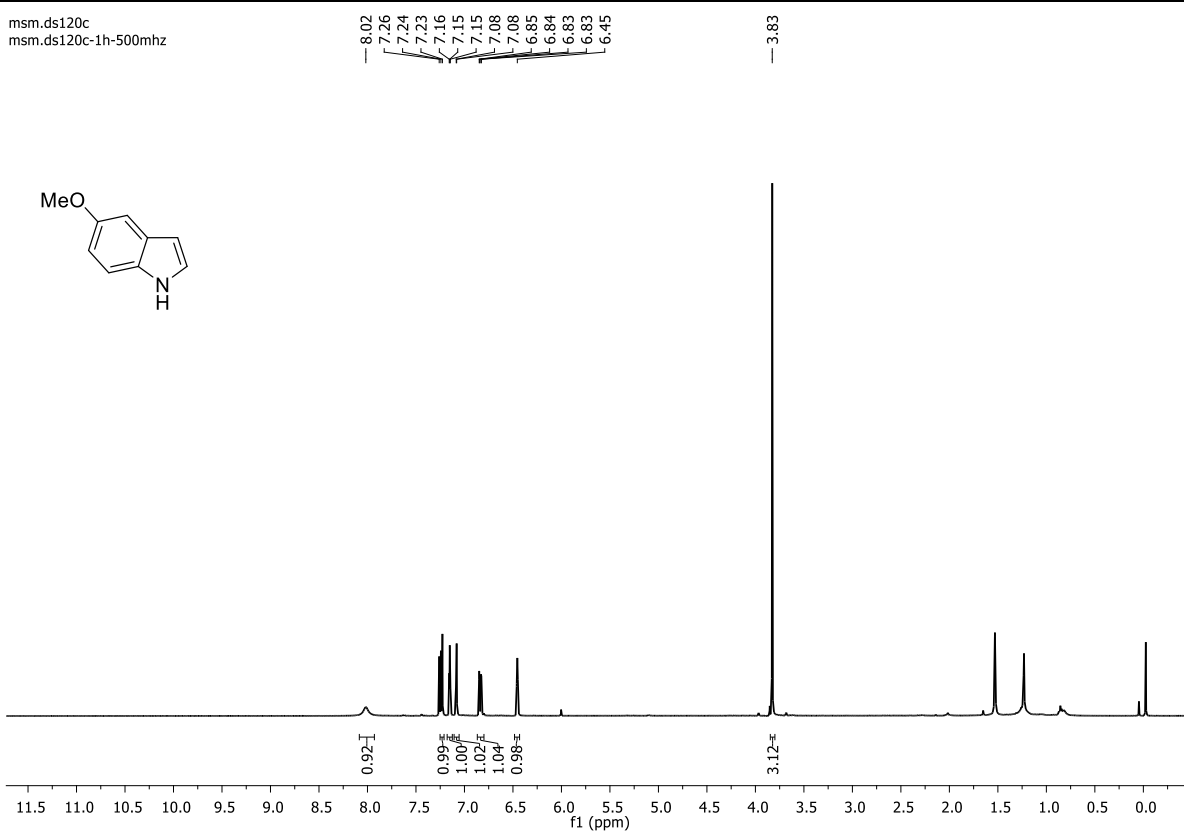

<sup>1</sup>H (400 MHz) NMR of **12c** in CDCl<sub>3</sub>

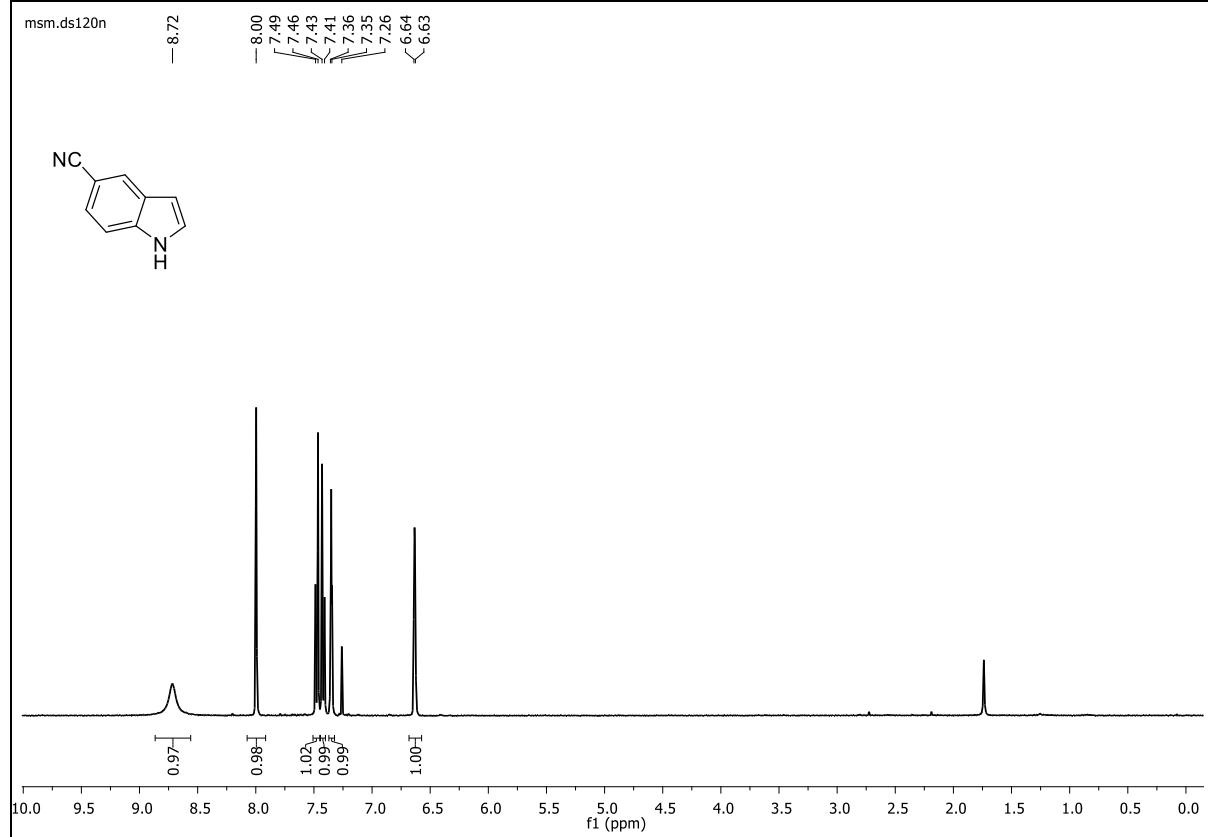

<sup>1</sup>H (400 MHz) NMR of **12d** in CDCl<sub>3</sub>

mzm.ds129R  
mzm.ds129R 1H NMR 400mhz

8.23  
7.35  
7.35  
7.34  
7.32  
7.23  
7.11  
7.09  
6.82

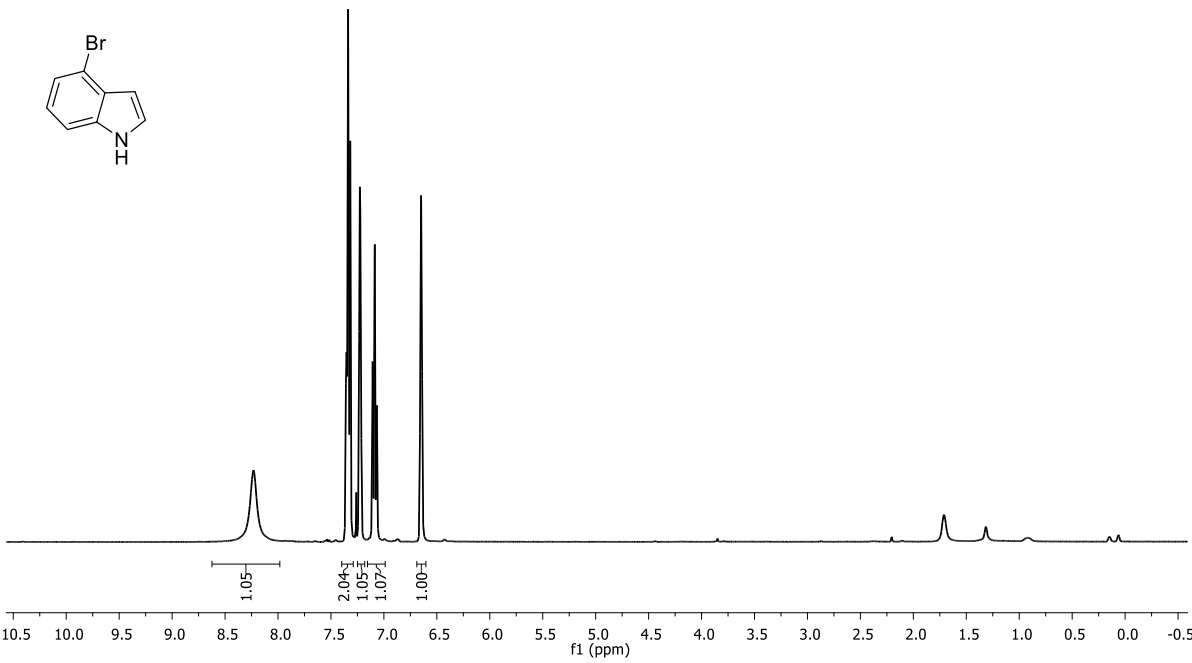



<sup>1</sup>H (400 MHz) NMR of **12e** in CDCl<sub>3</sub>

msm.sk1057r  
msm.sk1057r - 1H-400MHz

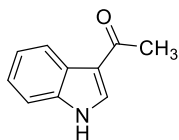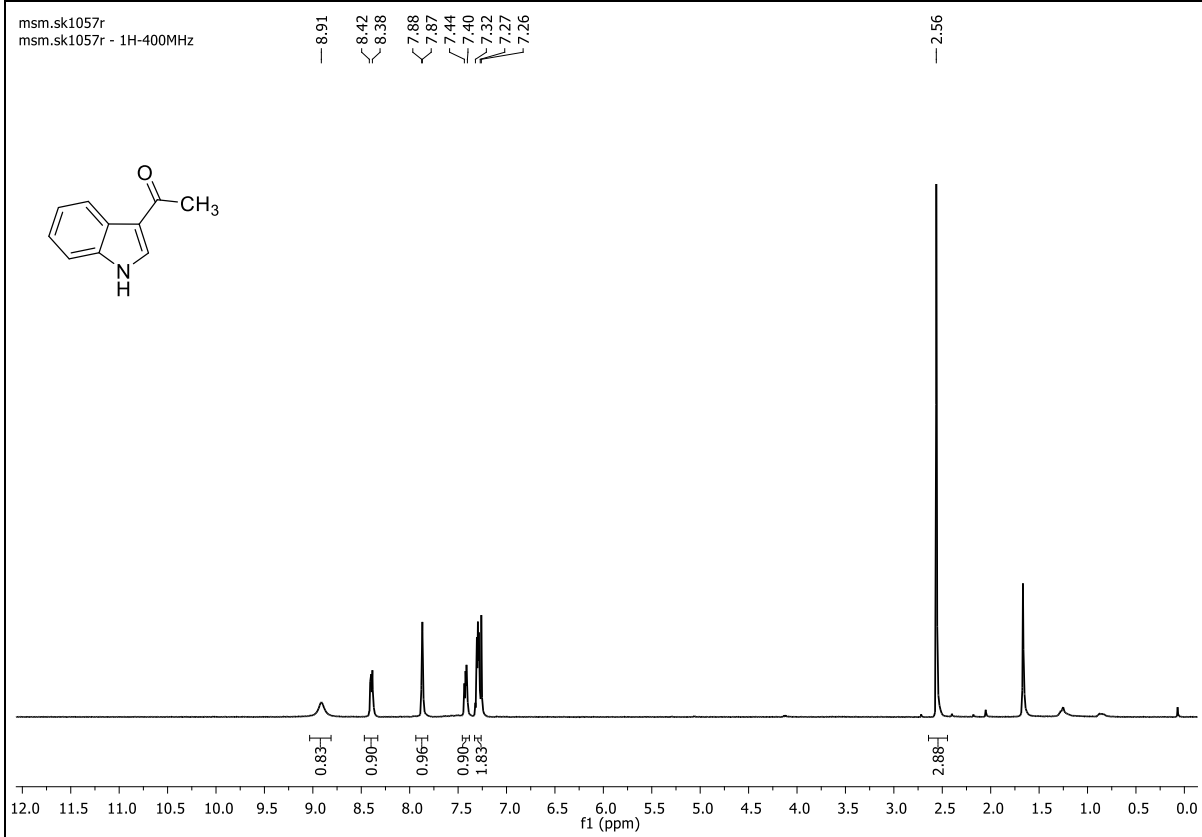

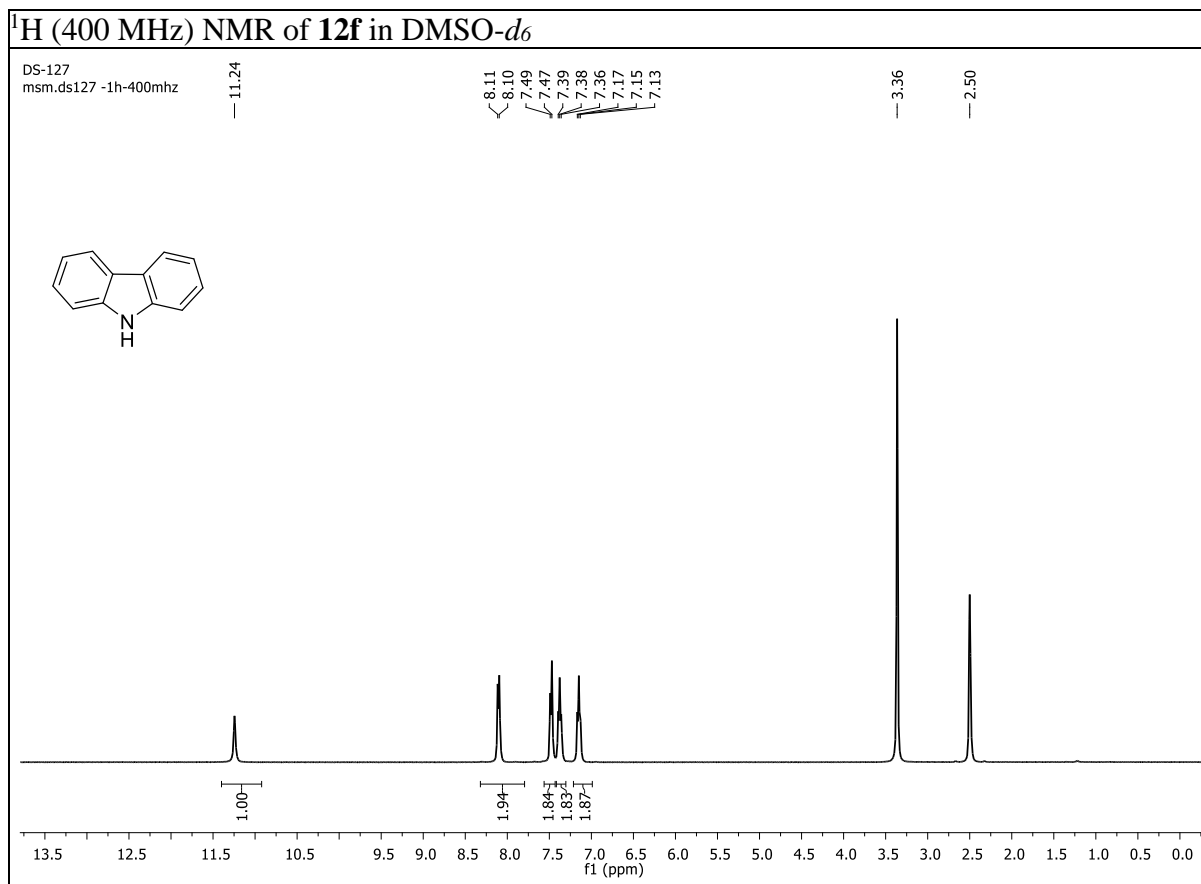

<sup>1</sup>H (400 MHz) NMR of **12g** in CDCl<sub>3</sub>

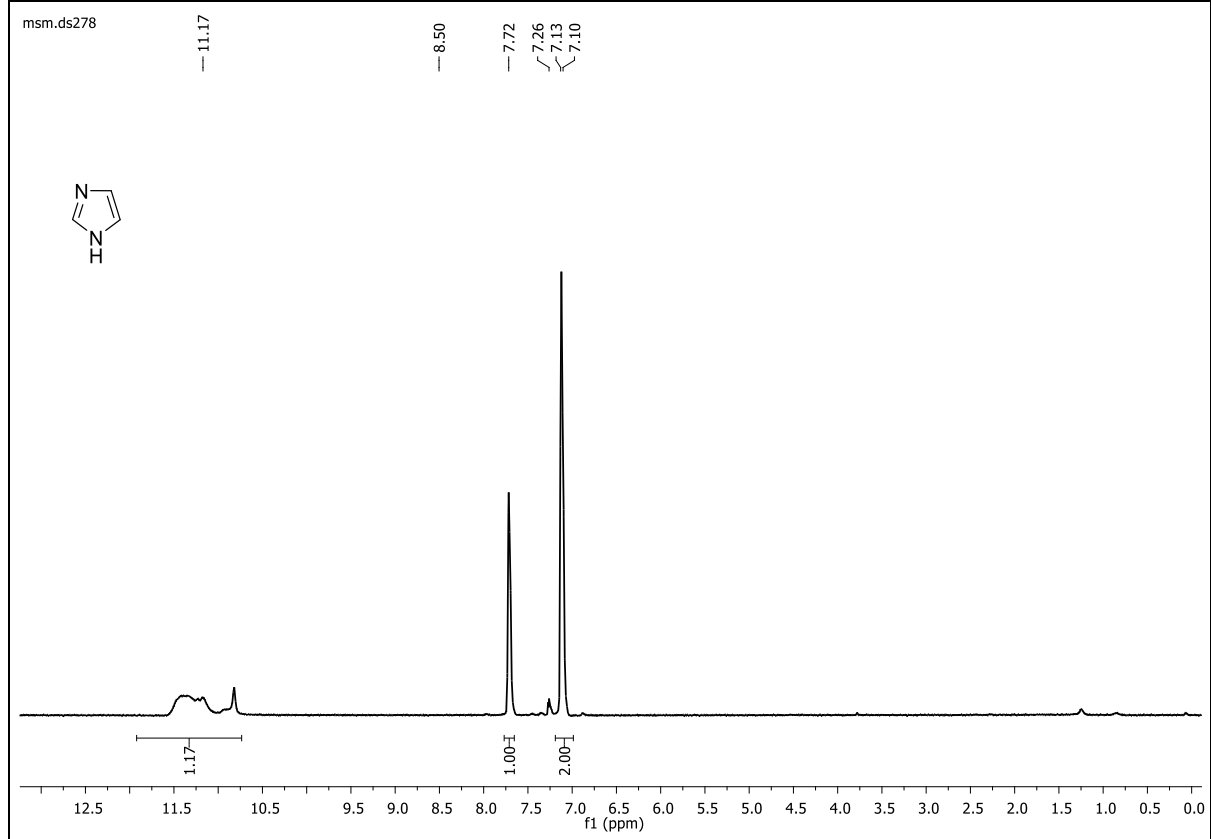

<sup>1</sup>H (400 MHz) NMR of **12h** in CDCl<sub>3</sub>

msm.dstr  
msm.dstr 1H NMR -400MHz

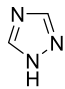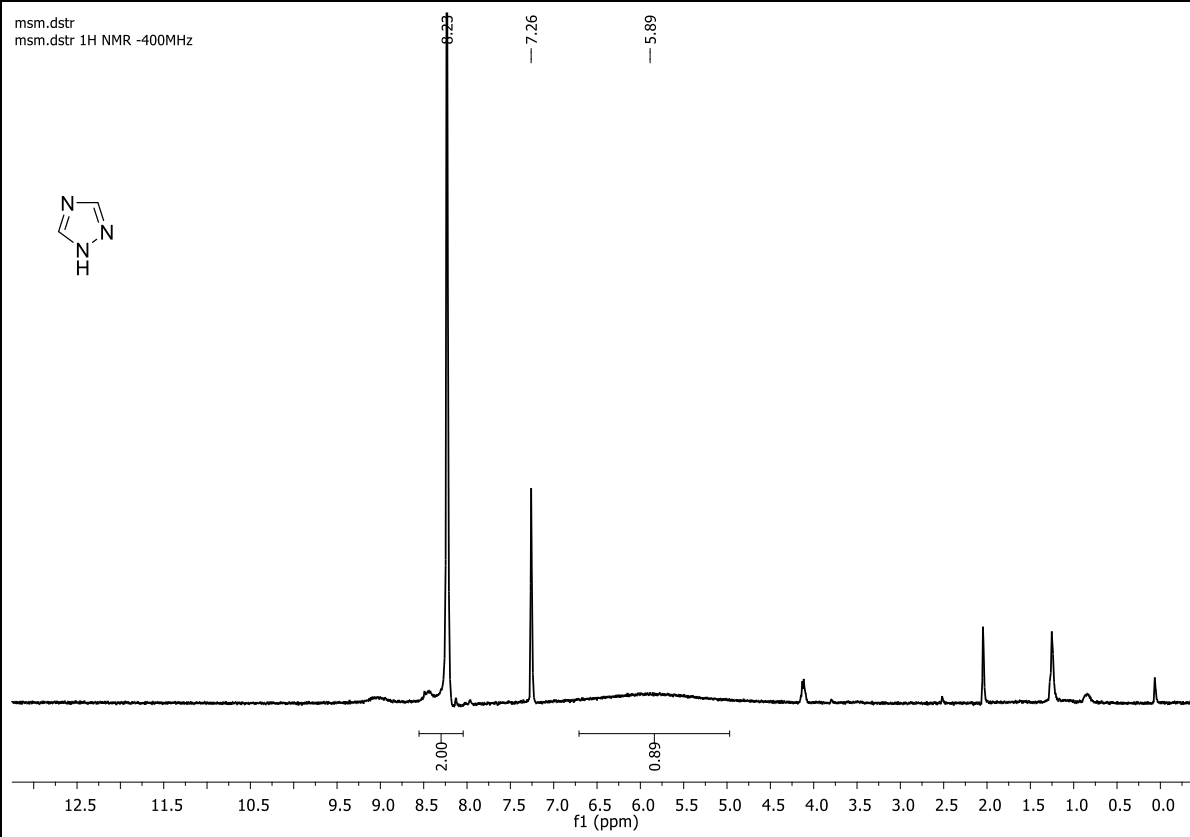

<sup>1</sup>H (500 MHz) NMR of **12i** in CDCl<sub>3</sub>

msm.ds272  
msm / ds / 272 - 1h - 500MHz

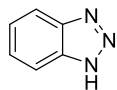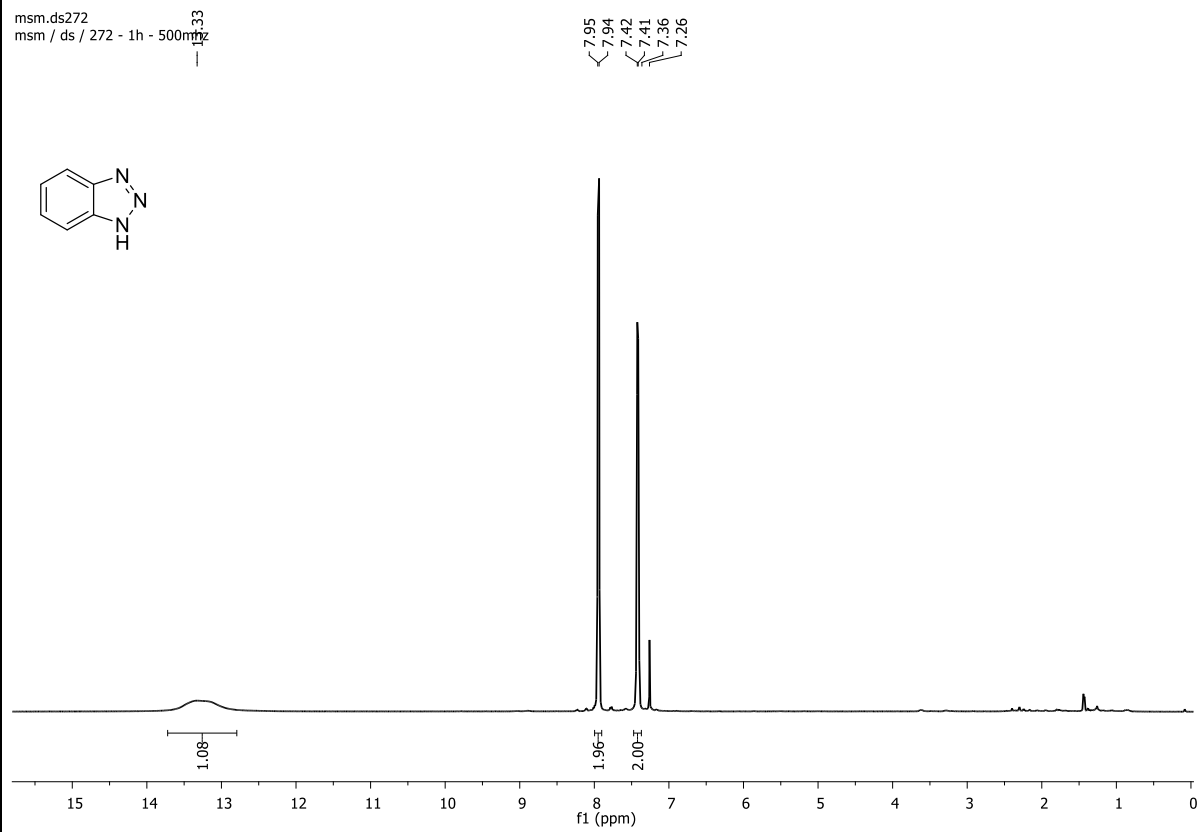

<sup>1</sup>H (400 MHz) NMR of **12j** in CDCl<sub>3</sub>

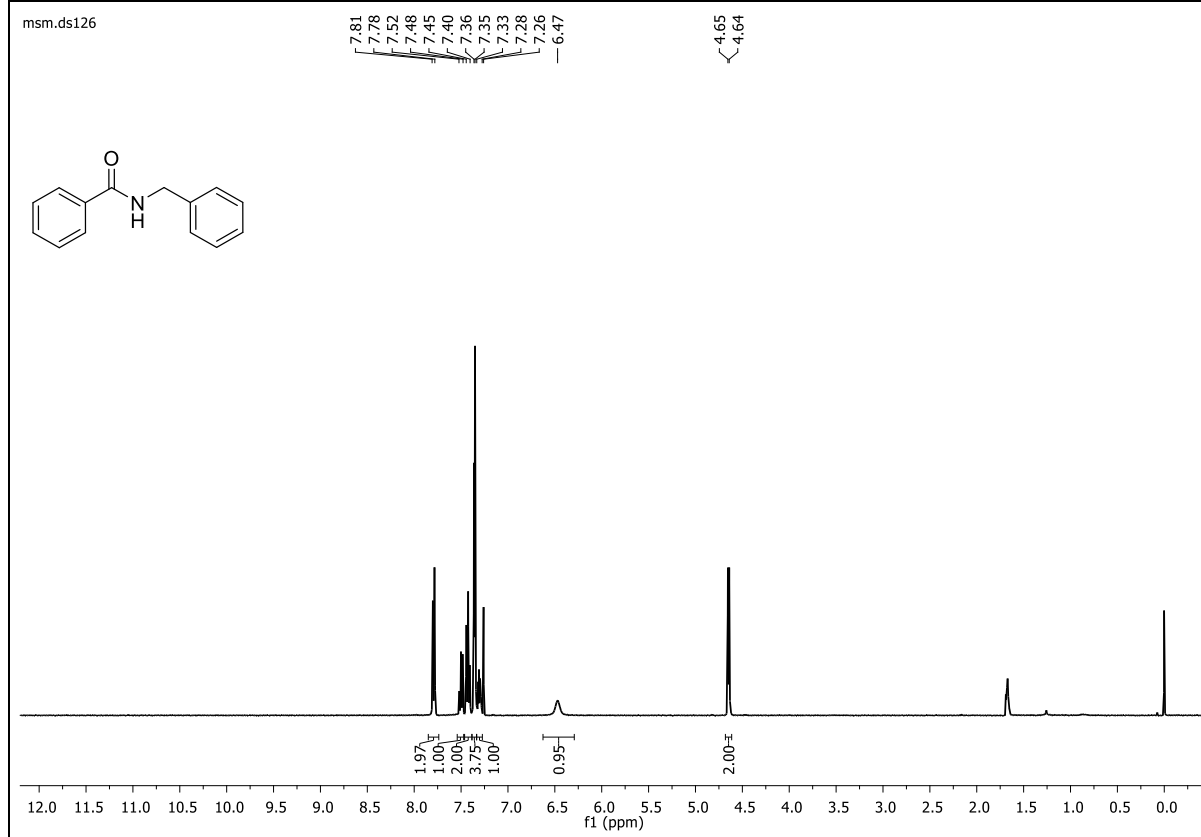

<sup>1</sup>H (400 MHz) NMR of **12k** in CDCl<sub>3</sub>

msm.ds313b  
msm.ds313b -1h - 400 MHz

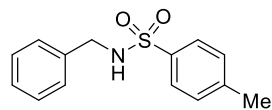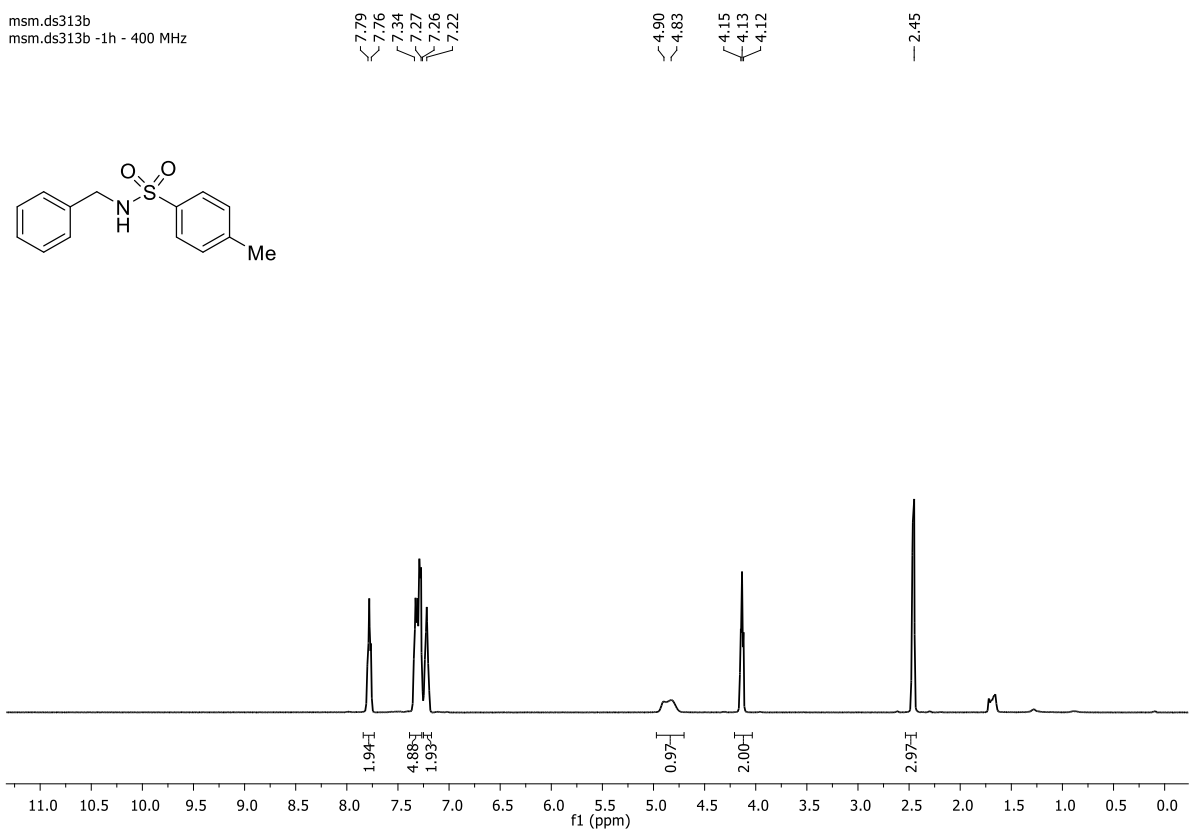

<sup>1</sup>H (400 MHz) NMR of **12l** in CDCl<sub>3</sub>

msm.sk1055au  
msm.sk1055au 1H NMR 400 MHz

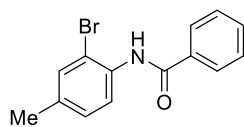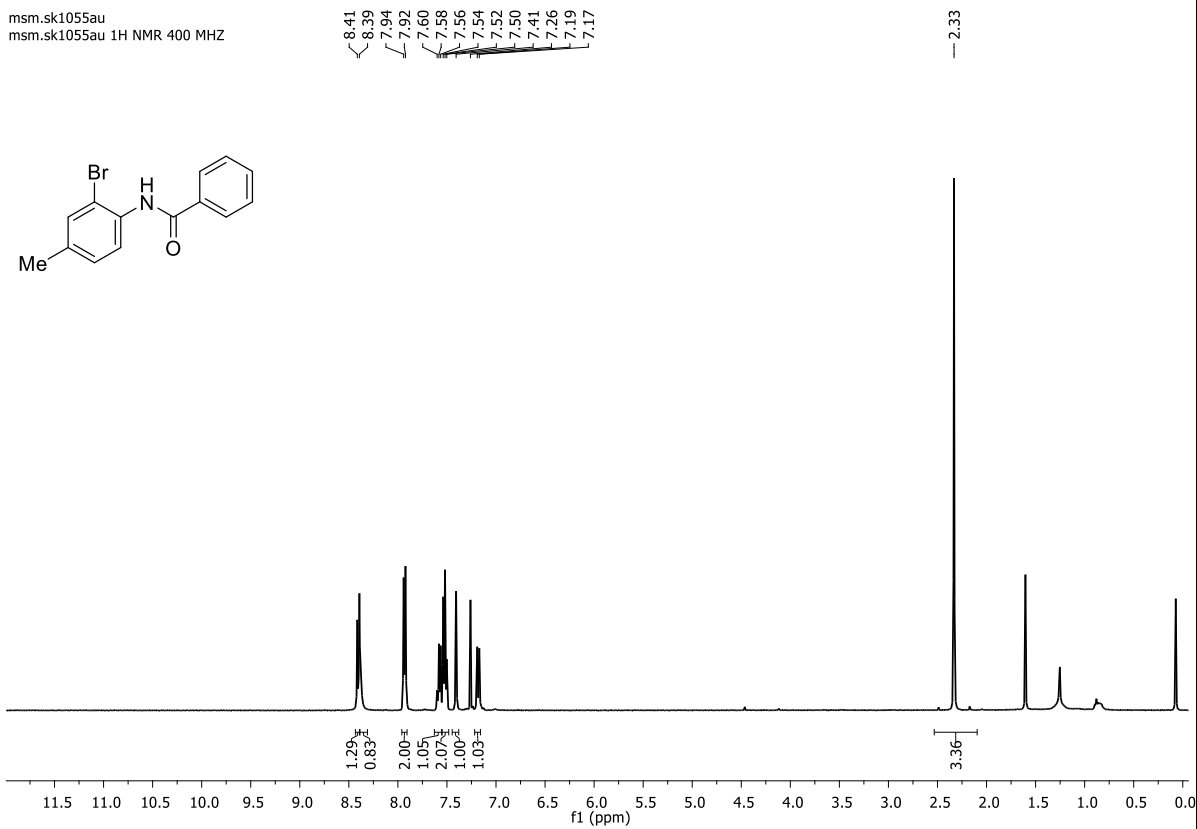



<sup>1</sup>H (400 MHz) NMR of **12m** in CDCl<sub>3</sub>

msm.ds279b

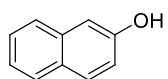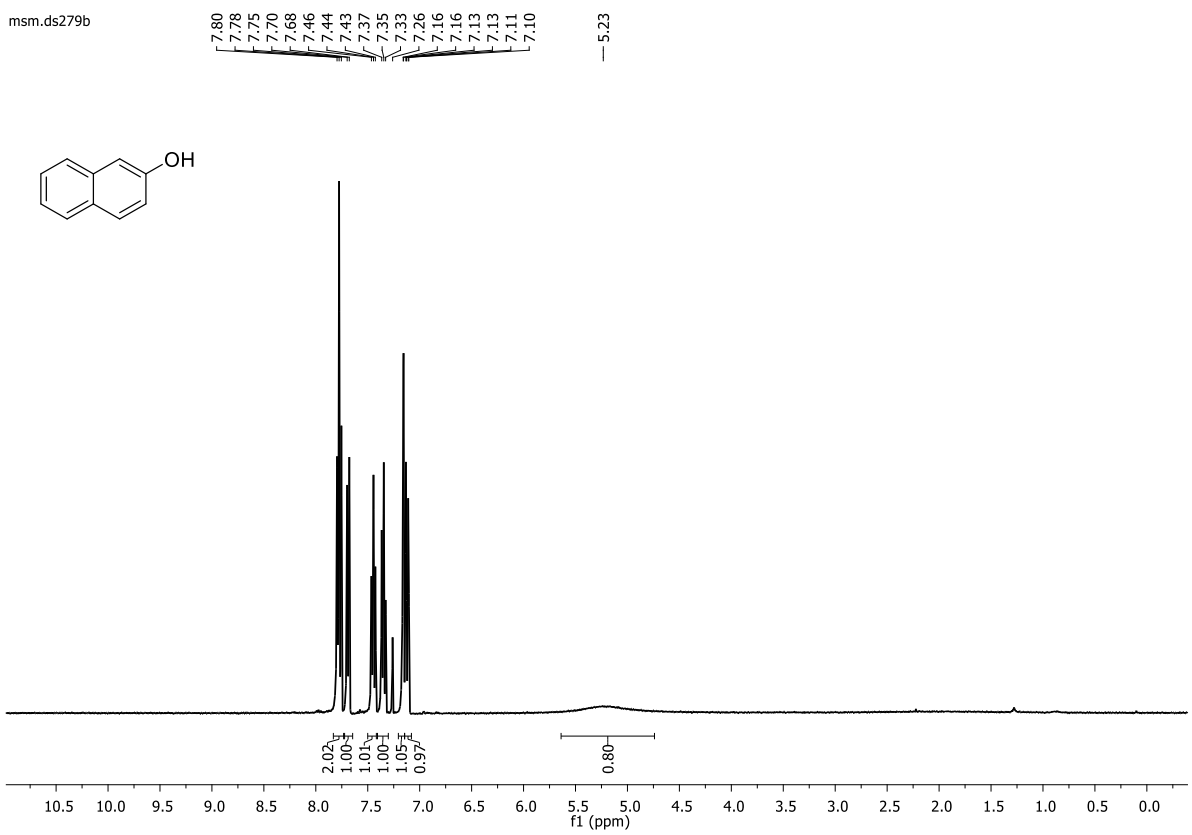

<sup>1</sup>H (500 MHz) NMR of **13a** in DMSO-d<sub>6</sub>

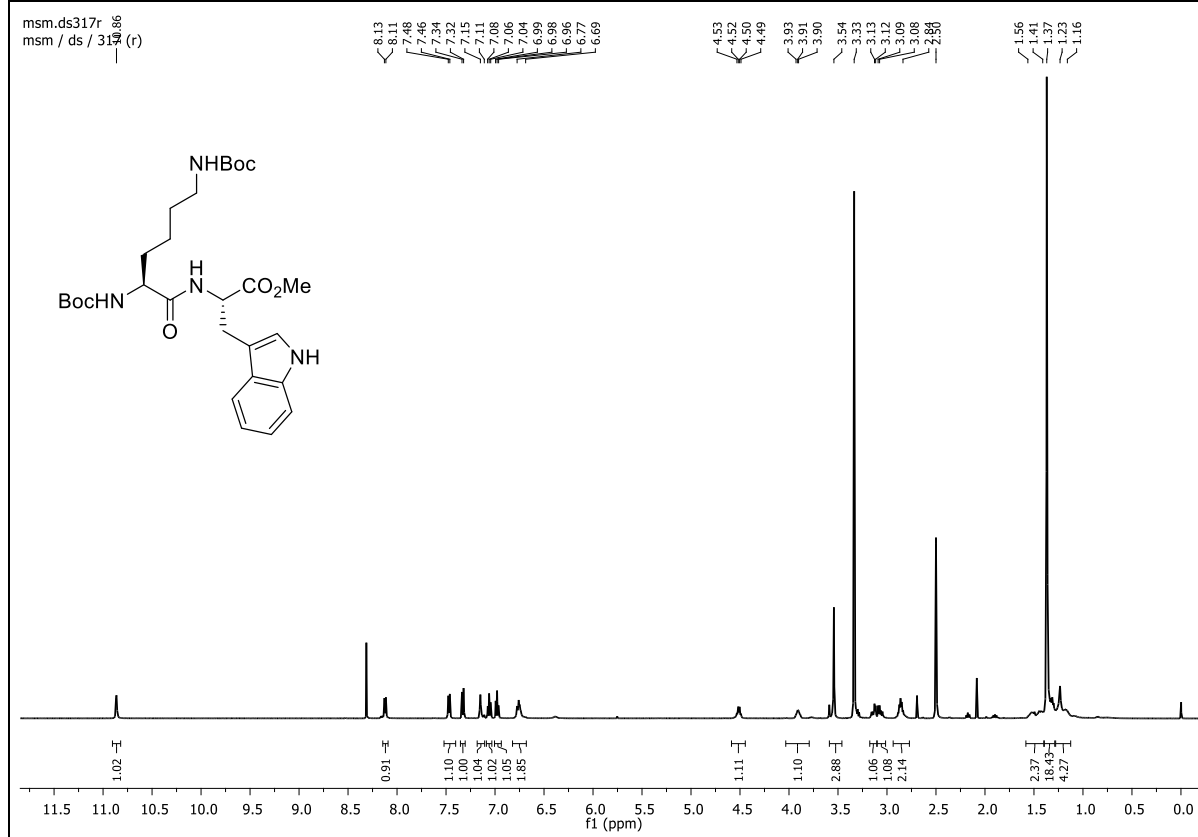

<sup>1</sup>H (400 MHz) NMR of **13b** in DMSO-*d*<sub>6</sub>

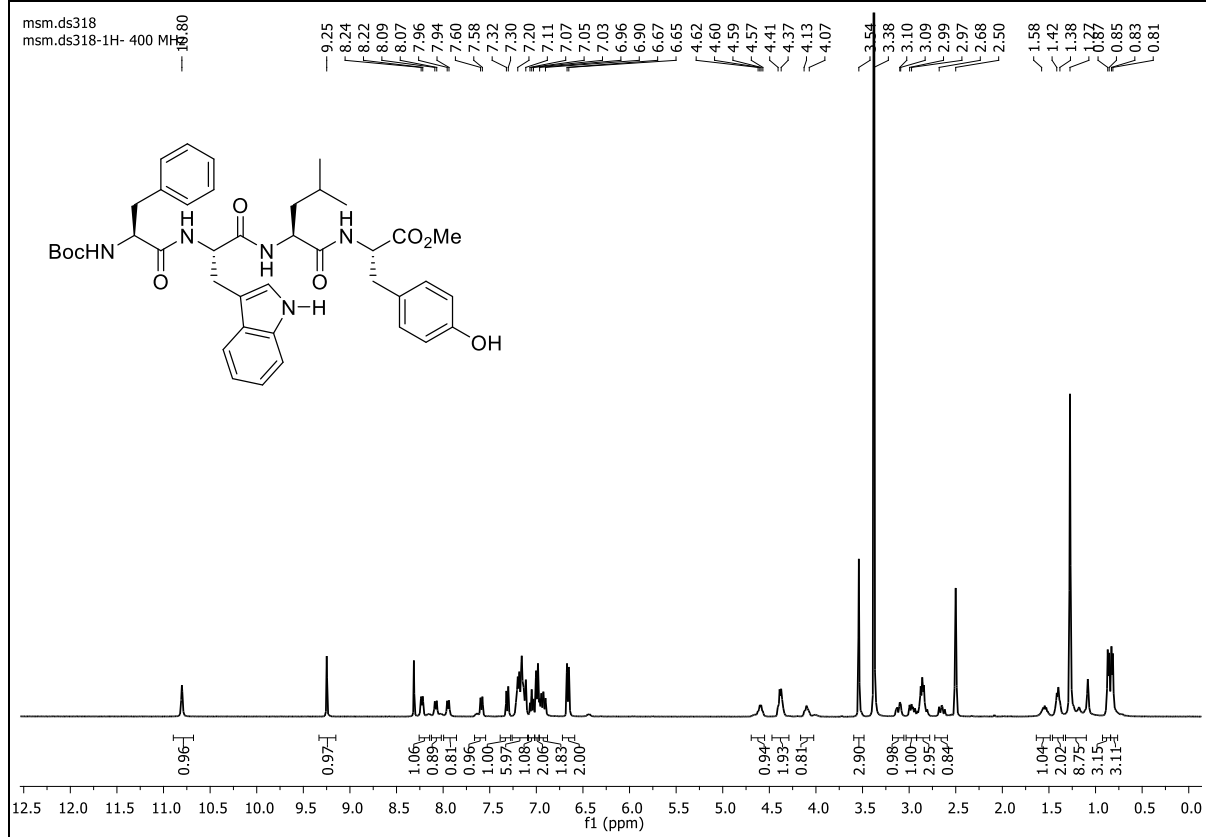

<sup>1</sup>H (400 MHz) NMR of **13c** in DMSO-d<sub>6</sub>

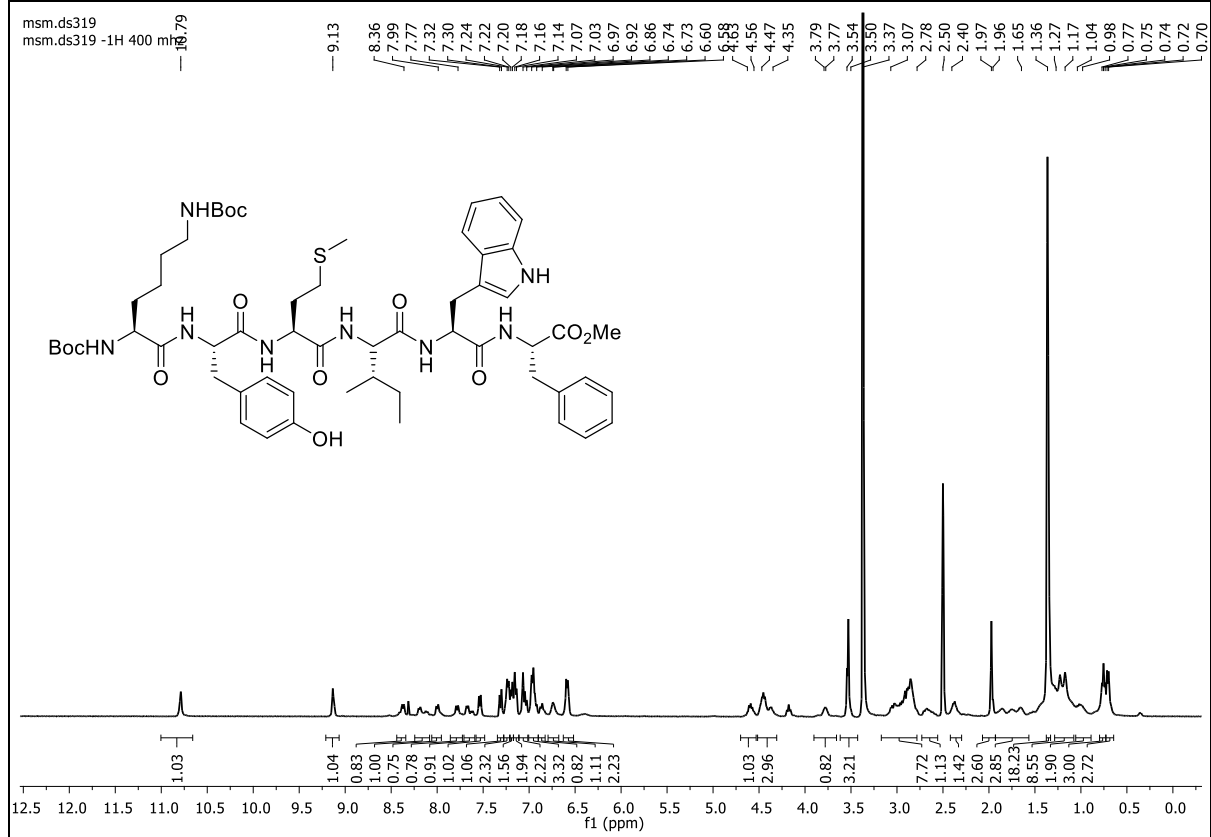

<sup>1</sup>H (400 MHz) NMR of **13d** in DMSO-*d*<sub>6</sub>

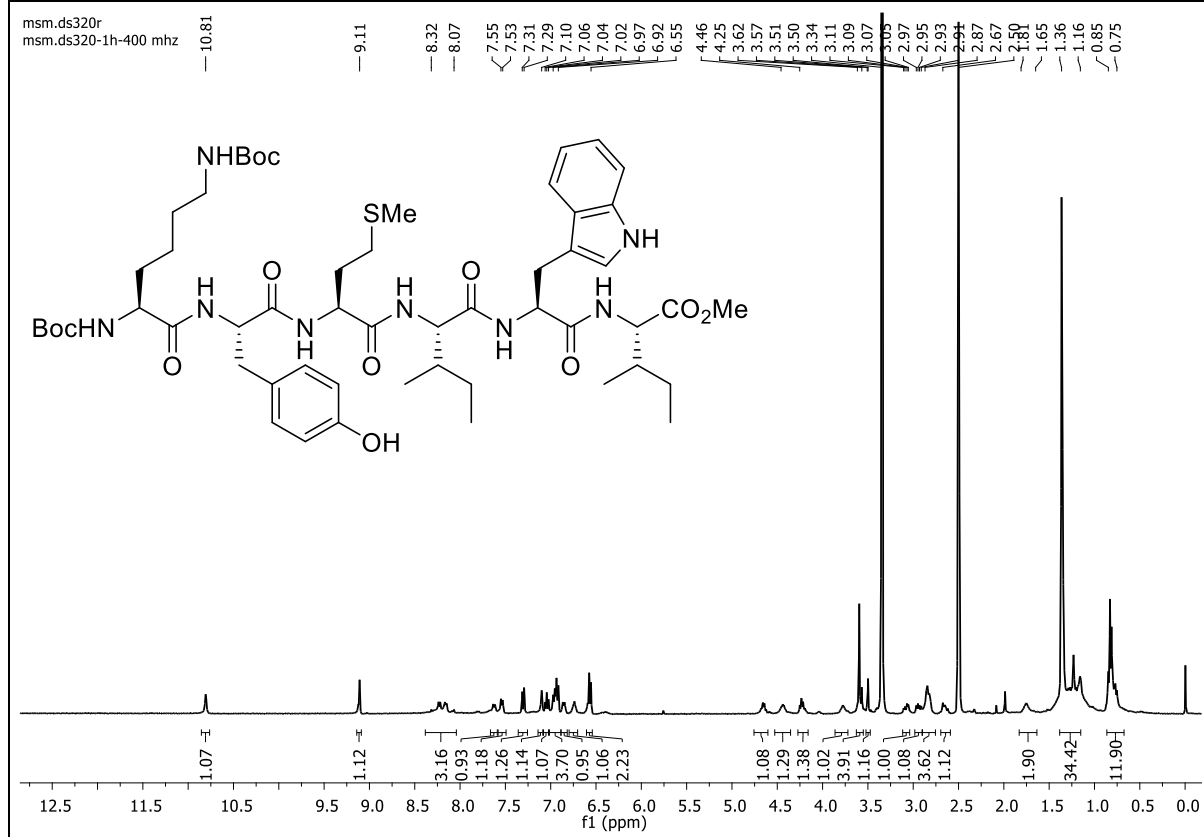

<sup>1</sup>H (400 MHz) NMR of **13e** in DMSO-*d*<sub>6</sub>

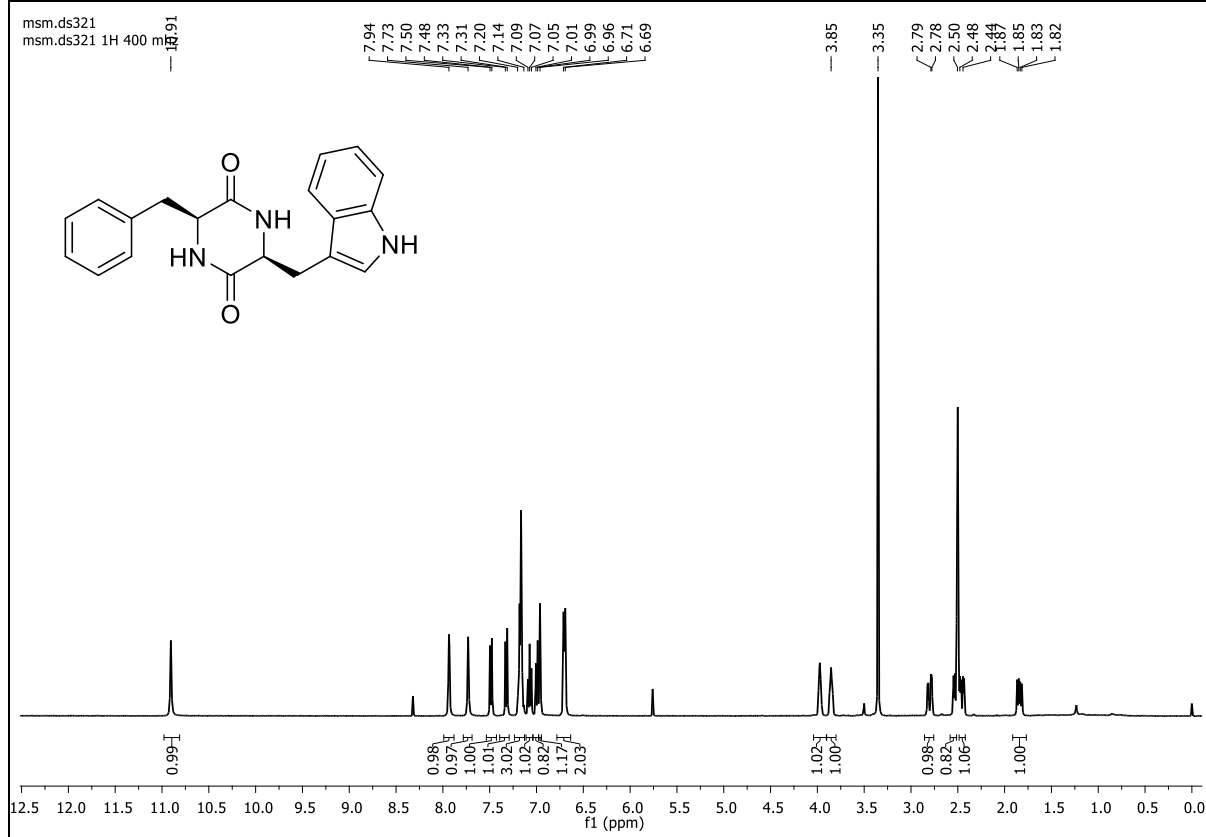

Supplement: d4sc03438d1.pdf [file d4sc03438d1.pdf]
